# Supplementary material for: Highly enantioselective synthesis of chiral 7-ring O- and N-heterocycles by a one-pot nitro-Michael–cyclization tandem reaction
Source: Royal Society of Chemistry journal article supplement (doi:10.1039/c3cc47397j), 2013-01-01

## Highly Enantioselective Synthesis of Chiral 7-Ring O- and N-Heterocycles by a One-pot Nitro-Michael/Cyclization Tandem Reaction

Renate Rohlmann, Constantin-Gabriel Daniliuc, Olga García Mancheño\*

*Westfälischen Wilhelms-Universität Münster, Organisch-Chemisches Institut, Corrensstraße 40,  
D-48149 Münster (Germany). Fax: (0049) 251 83 33202.*

E-mail: [olga.garcia@uni-muenster.de](mailto:olga.garcia@uni-muenster.de)

### Supporting Information

#### Contents

---

|                                                                                           |     |
|-------------------------------------------------------------------------------------------|-----|
| General information and materials                                                         | S1  |
| Experimental procedures and characterization                                              | S2  |
| Synthesis of the aldehyde precursors <b>9a</b> and <b>9b</b>                              | S2  |
| General procedure for the O- and N-allylation or propargylation                           | S3  |
| Analytical data for compounds <b>10a-s</b>                                                | S3  |
| General procedures for the synthesis of nitroolefins <b>2</b>                             | S8  |
| Analytical data for compounds <b>2a-s</b>                                                 | S9  |
| Optimization and general procedure for the enantioselective nitro-Michael addition        | S14 |
| Analytical data for compound <b>4a</b>                                                    | S14 |
| Optimization and general procedure for the nitrile cycloaddition reaction                 | S16 |
| General procedure for the one-pot reaction                                                | S16 |
| Analytical data for compounds <b>5</b>                                                    | S17 |
| Proposed mechanism and analytical data for the conjugated nitriles <b>6</b> side-products | S42 |
| Synthesis of bioactive compound <b>ent-8</b>                                              | S43 |
| References                                                                                | S48 |
| X-Ray ORTEP and data of compound <b>5a</b>                                                | S49 |
| NMR Spectra of compounds                                                                  | S50 |

---

**General information and materials.** NMR spectra were acquired on a Bruker ARX-300 and a Varian AV-300 or AV-400 MHz. Chemical shifts ( $\delta$ ) are reported in ppm relative to residual solvent signals ( $\text{CHCl}_3$ , 7.26 ppm for  $^1\text{H}$  NMR and 77.16 ppm for  $^{13}\text{C}$  NMR) and spin-spin coupling constants ( $J$ ) are given in Hz.  $^{13}\text{C}$  NMR spectra were acquired on a broad band decoupled mode. Mass spectra were recorded on a Micromass LCT spectrometer using electrospray ionisation ( $\text{ESI}^+$ ) techniques. Analytical thin layer chromatography (TLC) was performed using pre-coated aluminium-backed plates (Merck Kieselgel 60 F254) and visualised by ultraviolet irradiation or  $\text{KMnO}_4$  dip. Infrared spectra were recorded on a Varian Associated FT-IR 3100

Excalibur. The wave numbers ( $\nu$ ) of recorded IR-signals are quoted in  $\text{cm}^{-1}$ . Optical rotations,  $[\alpha]_{\text{D}}^{20}$ , were measured on a Perkin-Elmer 241 polarimeter. The enantiomeric excess (*ee*) of the products was determined by chiral stationary phase HPLC (Daicel Chiralpak IA, IC and AD-H or Daicel Chiralcel OD-H columns). Catalysts **1a-d**, **1e**<sup>2</sup> and **1f**<sup>3</sup> were prepared according to reported procedures in the literature.

X-Ray diffraction: Data sets were collected with a Nonius KappaCCD diffractometer. Programs used: data collection, COLLECT (Nonius B.V., 1998); data reduction Denzo-SMN (Z. Otwinowski, W. Minor, *Methods Enzymol.* **1997**, 276, 307-326); absorption correction, Denzo (Z. Otwinowski, D. Borek, W. Majewski, W. Minor, *Acta Crystallogr.* **2003**, A59, 228-234); structure solution SHELXS-97 (G. M. Sheldrick, *Acta Crystallogr.* **1990**, A46, 467-473); structure refinement SHELXL-97 (G. M. Sheldrick, *Acta Crystallogr.* **2008**, A64, 112-122) and graphics, XP (BrukerAXS, 2000). Thermals ellipsoids are shown with 30% probability, *R*-values are given for observed reflections, and *wR*<sup>2</sup> values are given for all reflections.

## Experimental procedures and characterization:

### Synthesis of the aldehyde precursors **9a** and **9b**<sup>4</sup>

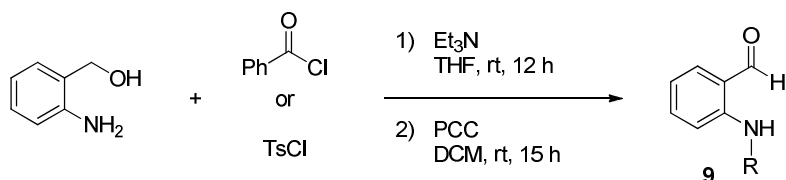

#### *N*-(2-Formylphenyl)benzamide (**9a**)<sup>5</sup>

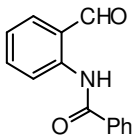 2-Aminobenzyl alcohol (2.00 g, 16.24 mmol, 1.0 equiv.) and Et<sub>3</sub>N (2.7 mL, 19.45 mmol, 1.2 equiv.) was dissolved in 50 mL of dry THF. Benzoyl chloride (2.1 mL, 17.86 mmol, 1.1 equiv.) was slowly added. After stirring the reaction mixture for 12 h at room temperature, the solvent was removed in vacuo and the residue was dissolved in ethylacetate, washed with saturated NaHCO<sub>3</sub> (aq.) and dried over MgSO<sub>4</sub>. Without further purification the alcohol was dissolved in 250 mL CH<sub>2</sub>Cl<sub>2</sub> and treated with pyridinium chlorochromate (4.20 g, 19.45 mmol, 1.2 equiv.). After full oxidation to the aldehyde, the reaction mixture was filtrated over a celite pad and the solvent removed in vacuo. The residue was purified by column chromatography (pentane-EtOAc: 15:1 → 9:1) affording *N*-(2-formylphenyl)benzamide (**9a**) (3.25 g, 14.45 mmol, 89%) as a white solid. <sup>1</sup>H NMR (400 MHz, CDCl<sub>3</sub>):  $\delta$  = 12.07 (s, 1H), 9.96 (d, *J* = 0.8 Hz, 1H), 8.94 (d, *J* = 8.5 Hz, 1H), 8.08 – 8.03 (m, 2H), 7.69 (dd, *J* = 7.6, 1.7 Hz, 1H), 7.64 (ddd, *J* = 8.8, 7.4, 1.7 Hz, 1H), 7.59 – 7.48 (m, 3H), 7.28 – 7.19 (m, 1H); <sup>13</sup>C NMR (100 MHz, CDCl<sub>3</sub>):  $\delta$  = 196.0, 166.1, 141.3, 136.4, 136.3, 134.4, 132.3, 129.0 (2C), 127.6 (2C), 123.1, 122.0, 120.0; HRMS (ESI<sup>+</sup>): calculated for C<sub>14</sub>H<sub>11</sub>NO<sub>2</sub>+Na<sup>+</sup> [*M*+Na]<sup>+</sup>: *m/z* = 248.0682, found 248.0685.

#### *N*-(2-Formylphenyl)-4-methylbenzenesulfonamide (**9b**)<sup>4</sup>

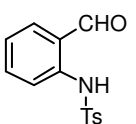 2-Aminobenzyl alcohol (2.00 g, 16.24 mmol, 1.0 equiv.) and pyridine (1.6 mL, 19.81 mmol, 1.2 equiv.) was dissolved in 60 mL of dry CHCl<sub>3</sub>. 4-Toluenesulfonyl chloride (3.44 g, 17.86 mmol, 1.1 equiv.) was dissolved in 60 mL CHCl<sub>3</sub> and slowly added. After stirring the

reaction mixture for 12 h at room temperature, the solvent was removed in vacuo and the residue was dissolved in ethylacetate, washed with saturated NaHCO<sub>3</sub> (aq.) and dried over MgSO<sub>4</sub>. Without further purification the alcohol was dissolved in 250 mL CH<sub>2</sub>Cl<sub>2</sub> and treated with pyridinium chlorochromate (4.20 g, 19.45 mmol, 1.2 equiv.). After full oxidation to the aldehyde, the reaction mixture was filtrated over a celite pad and the solvent removed in vacuo. The residue was purified by column chromatography (pentane-EtOAc: 15:1→9:1) affording *N*-(2-formylphenyl)-4-methylbenzenesulfonamide (**9b**) (4.24 g, 15.43 mmol, 95%) as a white solid. <sup>1</sup>H NMR (300 MHz, CDCl<sub>3</sub>): δ = 10.79 (s, 1H), 9.82 (d, *J* = 0.7 Hz, 1H), 7.80 – 7.72 (m, 2H), 7.68 (d, *J* = 8.4 Hz, 1H), 7.59 (dd, *J* = 7.6, 1.6 Hz, 1H), 7.50 (ddd, *J* = 8.6, 7.4, 1.6 Hz, 1H), 7.23 (dd, *J* = 8.2, 0.9 Hz, 2H), 7.16 (td, *J* = 7.5, 1.0 Hz, 1H), 2.36 (s, 3H); <sup>13</sup>C NMR (75 MHz, CDCl<sub>3</sub>): δ = 195.1, 144.3, 140.0, 136.4, 136.2, 135.9, 129.9, 127.4, 123.1, 122.0, 117.8, 21.7; HRMS (ESI<sup>+</sup>) calculated for C<sub>14</sub>H<sub>13</sub>NO<sub>3</sub>S+Na<sup>+</sup> [M+Na]<sup>+</sup>: *m/z* = 298.0508, found 298.0508.

### General procedure for the O- and N-allylation or propargylation<sup>5</sup>

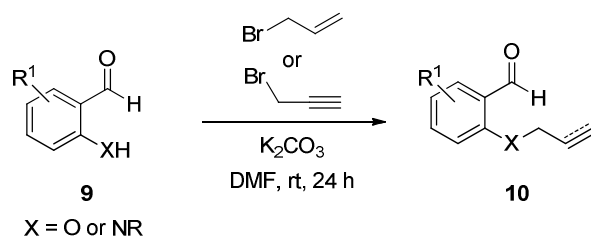

An ordinary vial equipped with a magnetic stirring bar was charged with aldehyde **9** (1 equiv.) and K<sub>2</sub>CO<sub>3</sub> (1.1 equiv.) in DMF (0.6 M). To the stirring solution allyl bromide or propargyl bromide (1.1 equiv.) was added dropwise. After stirring the solution for 2 days water was added and extracted 3 times with Et<sub>2</sub>O. The combined organic phases was dried over Na<sub>2</sub>SO<sub>4</sub> and concentrated. The residue was purified by column chromatography.

### 2-Allyloxy benzaldehyde (**10a**)<sup>5</sup>

Following the general procedure, salicylaldehyde (3.00 g, 24.56 mmol, 1.0 equiv.) was treated with K<sub>2</sub>CO<sub>3</sub> (3.73 g, 27.02 mmol, 1.1 equiv.) and allyl bromide (2.40 mL, 27.02 mmol, 1.1 equiv.) in 30 mL DMF. The 2-allyloxy benzaldehyde (**10a**) was isolated by distillation (1 Torr, 90 °C) as colorless oil (3.82 g, 23.53 mmol, 96%). <sup>1</sup>H NMR (300 MHz, CDCl<sub>3</sub>): δ = 10.53 (d, *J* = 0.8 Hz, 1H), 7.83 (dd, *J* = 7.7, 1.8 Hz, 1H), 7.52 (ddd, *J* = 8.4, 7.3, 1.9 Hz, 1H), 7.13 – 6.88 (m, 2H), 6.20 – 5.94 (m, 1H), 5.44 (dq, *J* = 17.3, 1.6 Hz, 1H), 5.33 (dq, *J* = 10.6, 1.4 Hz, 1H), 4.65 (dt, *J* = 5.1, 1.6 Hz, 2H); <sup>13</sup>C NMR (75 MHz, CDCl<sub>3</sub>): δ = 189.8, 161.0, 136.0, 132.5, 128.5, 125.1, 120.9, 118.1, 112.9, 69.2; HRMS (ESI<sup>+</sup>) calculated for C<sub>10</sub>H<sub>10</sub>O<sub>2</sub>+Na<sup>+</sup> [M+Na]<sup>+</sup>: *m/z* = 85.0573, found 85.0571.

### 2-(Allyloxy)-5-methylbenzaldehyde (**10e**)<sup>6</sup>

Following the general procedure, 5-methylsalicylaldehyde (855 mg, 6.28 mmol, 1.0 equiv.) was treated with K<sub>2</sub>CO<sub>3</sub> (927 mg, 6.71 mmol, 1.1 equiv.) and allyl bromide

(530  $\mu$ L, 6.71 mmol, 1.1 equiv.) in DMF (10 mL). The 2-(allyloxy)-5-methylbenzaldehyde (**10e**) was isolated by column chromatography (petane-EtOAc 400:3) as colorless oil (916 mg, 5.20 mmol, 83%). **<sup>1</sup>H NMR** (300 MHz, CDCl<sub>3</sub>):  $\delta$  = 10.50 (s, 1H), 7.64 (dd,  $J$  = 2.5, 1.0 Hz, 1H), 7.33 (ddd,  $J$  = 8.5, 2.1, 1.0 Hz, 1H), 6.88 (d,  $J$  = 8.5 Hz, 1H), 6.07 (ddt,  $J$  = 17.2, 10.4, 5.1 Hz, 1H), 5.44 (dq,  $J$  = 17.2, 1.6 Hz, 1H), 5.32 (dq,  $J$  = 10.6, 1.4 Hz, 1H), 4.63 (dt,  $J$  = 5.0, 1.4 Hz, 2H), 2.31 (s, 3H); **<sup>13</sup>C NMR** (75 MHz, CDCl<sub>3</sub>):  $\delta$  = 190.1, 159.2, 136.6, 132.7, 130.4, 128.6, 124.9, 118.1, 113.0, 69.4, 20.4. **HRMS** (ESI<sup>+</sup>): calculated for C<sub>11</sub>H<sub>12</sub>O<sub>2</sub>+Na<sup>+</sup> [M+Na]<sup>+</sup>:  $m/z$  = 199.0730, found 199.0732.

### 2-(Allyloxy)-5-methoxybenzaldehyde (**10f**)

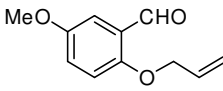 Following the general procedure, 5-methoxysalicylaldehyde (1.12 g, 7.35 mmol, 1.0 equiv.) was treated with K<sub>2</sub>CO<sub>3</sub> (1.10 g, 7.85 mmol, 1.1 equiv.) and allyl bromide (670  $\mu$ L, 7.85 mmol, 1.1 equiv.) in DMF (10 mL). The 2-(allyloxy)-5-methoxybenzaldehyde (**10f**) was isolated by column chromatography (petane-EtOAc 400:3) as colorless oil (1.41 mg, 7.34 mmol, 99%). **<sup>1</sup>H NMR** (400 MHz, CDCl<sub>3</sub>):  $\delta$  = 10.47 (s, 1H), 7.30 (d,  $J$  = 3.3 Hz, 1H), 7.08 (dd,  $J$  = 9.1, 3.3 Hz, 1H), 6.91 (d,  $J$  = 9.1 Hz, 1H), 6.03 (ddt,  $J$  = 17.3, 10.4, 5.2 Hz, 1H), 5.40 (dq,  $J$  = 17.3, 1.6 Hz, 1H), 5.29 (dq,  $J$  = 10.6, 1.4 Hz, 1H), 4.58 (dt,  $J$  = 5.2, 1.6 Hz, 2H), 3.77 (s, 3H); **<sup>13</sup>C NMR** (100 MHz, CDCl<sub>3</sub>):  $\delta$  = 189.5, 155.8, 153.8, 132.7, 125.4, 123.5, 118.0, 114.9, 110.3, 70.0, 55.8; **HRMS** (ESI<sup>+</sup>) calculated for C<sub>11</sub>H<sub>12</sub>O<sub>3</sub>+Na<sup>+</sup> [M+Na]<sup>+</sup>:  $m/z$  = 215.0679, found 215.0686.

### 2-(Allyloxy)-4-methoxybenzaldehyde (**10g**)<sup>6</sup>

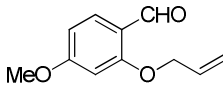 Following the general procedure, 4-methoxysalicylaldehyde (500 mg, 3.29 mmol, 1.0 equiv.) was treated with K<sub>2</sub>CO<sub>3</sub> (499 mg, 3.61 mmol, 1.1 equiv.) and allyl bromide (313  $\mu$ L, 3.61 mmol, 1.1 equiv.) in DMF (5 mL). The 2-(allyloxy)-4-methoxybenzaldehyde (**10g**) was isolated by column chromatography (petane-EtOAc 9:1) as colorless oil (620 mg, 3.23 mmol, 98%). **<sup>1</sup>H NMR** (300 MHz, CDCl<sub>3</sub>):  $\delta$  = 10.35 (d,  $J$  = 0.8 Hz, 1H), 7.82 (d,  $J$  = 8.7 Hz, 1H), 6.55 (ddd,  $J$  = 8.7, 2.2, 0.8 Hz, 1H), 6.43 (d,  $J$  = 2.2 Hz, 1H), 6.07 (ddt,  $J$  = 17.3, 10.4, 5.1 Hz, 1H), 5.45 (dq,  $J$  = 17.3, 1.6 Hz, 1H), 5.33 (dq,  $J$  = 10.5, 1.4 Hz, 1H), 4.62 (dt,  $J$  = 5.1, 1.6 Hz, 2H), 3.86 (s, 3H); **<sup>13</sup>C NMR** (75 MHz, CDCl<sub>3</sub>):  $\delta$  = 188.3, 166.0, 162.6, 132.3, 130.5, 119.2, 118.1, 106.0, 99.0, 69.1, 55.6; **HRMS** (ESI<sup>+</sup>) calculated for C<sub>11</sub>H<sub>12</sub>O<sub>3</sub>+Na<sup>+</sup> [M+Na]<sup>+</sup>:  $m/z$  = 215.0679, found 215.0688.

### 2-(Allyloxy)-5-methoxybenzaldehyde (**10h**)<sup>5</sup>

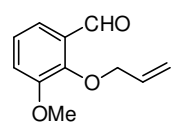 Following the general procedure, 3-methoxysalicylaldehyde (1.09 g, 7.14 mmol, 1.0 equiv.) was treated with K<sub>2</sub>CO<sub>3</sub> (1.10 g, 7.85 mmol, 1.1 equiv.) and allyl bromide (670  $\mu$ L, 7.85 mmol, 1.1 equiv.) in DMF (10 mL). The 2-(allyloxy)-5-methoxybenzaldehyde (**10h**) was isolated by column chromatography (petane-EtOAc 400:3→400:14) as colorless oil (1.31 g, 6.82 mmol, 95%). **<sup>1</sup>H NMR** (400 MHz, CDCl<sub>3</sub>):  $\delta$  = 10.42 (d,  $J$  = 0.8 Hz, 1H), 7.39 (dd,  $J$  = 6.9, 2.5 Hz, 1H), 7.17 – 7.04 (m,

2H), 6.05 (ddt,  $J = 17.1, 10.3, 6.1$  Hz, 1H), 5.33 (dq,  $J = 17.2, 1.5$  Hz, 1H), 5.24 (dq,  $J = 10.3, 1.2$  Hz, 1H), 4.64 (dt,  $J = 6.1, 1.3$  Hz, 2H), 3.88 (s, 3H);  $^{13}\text{C}$  NMR (100 MHz,  $\text{CDCl}_3$ ):  $\delta = 190.5, 153.1, 151.3, 133.2, 130.2, 124.2, 119.1, 119.0, 118.0, 75.2, 56.1$ ; HRMS ( $\text{ESI}^+$ ): calculated for  $\text{C}_{11}\text{H}_{12}\text{O}_3 + \text{Na}^+$   $[\text{M} + \text{Na}]^+$ :  $m/z = 215.0679$ , found 215.0689.

### 2-(Allyloxy)-4-diethylaminobenzaldehyde (10i)

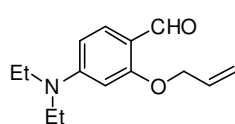

Following the general procedure, 4-diethylaminosalicylaldehyde (1.00 g, 5.17 mmol, 1.0 equiv.) was treated with  $\text{K}_2\text{CO}_3$  (786 mg, 5.69 mmol, 1.1 equiv.) and allyl bromide (490  $\mu\text{L}$ , 5.69 mmol, 1.1 equiv.) in DMF (8 mL). The 2-(allyloxy)-4-diethylaminobenzaldehyde (**10i**) was isolated by column chromatography (petane-EtOAc 9:1) as a yellow solid (1.20 g, 5.14 mmol, 99%).  $^1\text{H}$  NMR (300 MHz,  $\text{CDCl}_3$ ):  $\delta = 10.20$  (s, 1H), 7.72 (d,  $J = 8.9$  Hz, 1H), 6.37 – 6.22 (m, 1H), 6.07 (ddt,  $J = 17.5, 10.4, 5.1$  Hz, 2H), 5.45 (dq,  $J = 17.3, 1.6$  Hz, 1H), 5.32 (dq,  $J = 10.4, 1.4$  Hz, 1H), 4.63 (dt,  $J = 5.2, 1.6$  Hz, 2H), 3.41 (q,  $J = 7.1$  Hz, 4H), 1.21 (t,  $J = 7.1$  Hz, 6H);  $^{13}\text{C}$  NMR (75 MHz,  $\text{CDCl}_3$ ):  $\delta = 187.2, 163.3, 133.1$  (2C), 130.5 (2C), 117.8 (2C), 104.8, 69.1, 45.2 (2C), 12.7 (2C); HRMS ( $\text{ESI}^+$ ) calculated for  $\text{C}_{14}\text{H}_{19}\text{NO}_2 + \text{Na}^+$   $[\text{M} + \text{Na}]^+$ :  $m/z = 256.1208$ , found 256.1309.

### 2-(Allyloxy)-1-naphthaldehyde (10j)<sup>5</sup>

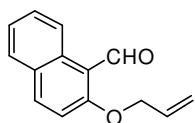

Following the general procedure, 2-hydroxy-1-naphthaldehyde (2.00 g, 11.62 mmol, 1.0 equiv.) was treated with  $\text{K}_2\text{CO}_3$  (1.77 g, 12.78 mmol, 1.1 equiv.) and allyl bromide (1.10 mL, 142.78 mmol, 1.1 equiv.) in DMF (18 mL). 2-(allyloxy)-1-naphthaldehyde (**10j**) was isolated by column chromatography (petane-EtOAc 9:1) as a white solid (2.44 g, 11.50 mmol, 99%).  $^1\text{H}$  NMR (300 MHz,  $\text{CDCl}_3$ ):  $\delta = 10.95$  (s, 1H), 9.28 (dd,  $J = 8.8, 1.0$  Hz, 1H), 8.03 (dt,  $J = 9.1, 0.6$  Hz, 1H), 7.77 (ddt,  $J = 8.2, 1.4, 0.6$  Hz, 1H), 7.62 (ddd,  $J = 8.6, 6.9, 1.5$  Hz, 1H), 7.42 (ddd,  $J = 8.1, 6.9, 1.2$  Hz, 1H), 7.26 (d,  $J = 9.1$  Hz, 1H), 6.10 (ddt,  $J = 17.3, 10.4, 5.1$  Hz, 1H), 5.48 (dtd,  $J = 17.2, 1.7, 1.2$  Hz, 1H), 5.36 (dq,  $J = 10.6, 1.4$  Hz, 1H), 4.79 (dt,  $J = 5.1, 1.6$  Hz, 2H);  $^{13}\text{C}$  NMR (75 MHz,  $\text{CDCl}_3$ ):  $\delta = 192.2, 163.2, 137.6, 132.4, 131.7, 130.0, 128.7, 128.3, 125.1, 125.0, 118.5, 117.2, 113.9, 70.3$ ; HRMS ( $\text{ESI}^+$ ) calculated for  $\text{C}_{14}\text{H}_{12}\text{O}_2 + \text{Na}^+$   $[\text{M} + \text{Na}]^+$ :  $m/z = 235.0730$ , found 235.0737.

### 2-(Allyloxy)-5-fluorobenzaldehyde (10k)<sup>5</sup>

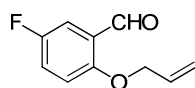

Following the general procedure, 5-fluorobenzaldehyde (1.00 g, 7.14 mmol, 1.0 equiv.) was treated with  $\text{K}_2\text{CO}_3$  (1.10 g, 7.85 mmol, 1.1 equiv.) and allyl bromide (670  $\mu\text{L}$ , 7.85 mmol, 1.1 equiv.) in DMF (10 mL). The 2-(allyloxy)-5-fluorobenzaldehyde (**10k**) was isolated by column chromatography (petane-EtOAc 400:5) as colorless oil (1.89 g, 6.60 mmol, 93%).  $^1\text{H}$  NMR (300 MHz,  $\text{CDCl}_3$ ):  $\delta = 10.48$  (d,  $J = 3.2$  Hz, 1H), 7.51 (dd,  $J = 8.3, 3.3$  Hz, 1H), 7.23 (ddd,  $J = 9.1, 7.6, 3.3$  Hz, 1H), 6.95 (dd,  $J = 9.1, 3.9$  Hz, 1H), 6.06 (ddt,  $J = 17.1, 10.5, 5.2$  Hz, 1H), 5.44 (dq,  $J = 17.3, 1.6$  Hz, 1H), 5.35 (dq,  $J = 10.5, 1.4$  Hz, 1H), 4.64 (dt,  $J = 5.3, 1.5$  Hz, 2H);  $^{13}\text{C}$  NMR (75 MHz,  $\text{CDCl}_3$ ):  $\delta = 188.8$  (d,  $^4J = 1.8$  Hz),

157.4 (d,  $^4J = 1.5$  Hz), 157.1 (d,  $^1J = 241.5$  Hz), 132.3, 126.0 (d,  $^3J = 6.1$  Hz), 122.6 (d,  $^2J = 23.9$  Hz), 118.5, 114.7 (d,  $^3J = 7.2$  Hz), 114.2 (d,  $^2J = 23.4$  Hz), 70.0;  **$^{19}\text{F}$  NMR** (282 MHz,  $\text{CDCl}_3$ ):  $\delta = -122.33$ ; **HRMS** ( $\text{ESI}^+$ ) calculated for  $\text{C}_{10}\text{H}_9\text{FO}_2 + \text{Na}^+$   $[\text{M} + \text{Na}]^+$ :  $m/z = 203.0479$ , found 203.0483.

### 2-(Allyloxy)-5-bromobenzaldehyde (**10l**)<sup>5</sup>

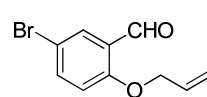 Following the general procedure, 5-bromosalicylaldehyde (1.44 g, 7.14 mmol, 1.0 equiv.) was treated with  $\text{K}_2\text{CO}_3$  (1.10 g, 7.85 mmol, 1.1 equiv.) and allyl bromide (670  $\mu\text{L}$ , 7.85 mmol, 1.1 equiv.) in DMF (10 mL). The 2-(allyloxy)-5-bromobenzaldehyde (**10l**) was isolated by column chromatography (petane-EtOAc 400:3) as a yellow solid (1.67 g, 6.93 mmol, 97%).  **$^1\text{H}$  NMR** (400 MHz,  $\text{CDCl}_3$ ):  $\delta = 10.41$  (s, 1H), 7.89 (d,  $J = 2.7$  Hz, 1H), 7.57 (dd,  $J = 8.9, 2.6$  Hz, 1H), 6.86 (d,  $J = 8.9$  Hz, 1H), 6.04 (ddt,  $J = 17.3, 10.4, 5.2$  Hz, 1H), 5.42 (dq,  $J = 17.2, 1.6$  Hz, 1H), 5.33 (dq,  $J = 10.6, 1.4$  Hz, 1H), 4.63 (dt,  $J = 5.2, 1.6$  Hz, 2H);  **$^{13}\text{C}$  NMR** (100 MHz,  $\text{CDCl}_3$ ):  $\delta = 188.3, 159.9, 138.3, 132.0, 131.0, 126.4, 118.6, 115.0, 113.7, 69.6$ ; **HRMS** ( $\text{ESI}^+$ ) calculated for  $\text{C}_{10}\text{H}_9\text{BrO}_2 + \text{Na}^+$   $[\text{M} + \text{Na}]^+$ :  $m/z = 262.9678$ , found 262.9677.

### 2-(Allyloxy)-4,6-dichlorobenzaldehyde (**10m**)<sup>5</sup>

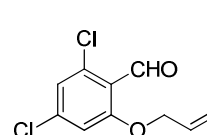 Following the general procedure, 4,6-dichlorosalicylaldehyde (701 mg, 3.67 mmol, 1.0 equiv.) was treated with  $\text{K}_2\text{CO}_3$  (558 mg, 4.04 mmol, 1.1 equiv.) and allyl bromide (350  $\mu\text{L}$ , 4.04 mmol, 1.1 equiv.) in DMF (6 mL). The 2-(allyloxy)-4,6-dichlorobenzaldehyde (**10m**) was isolated by column chromatography (petane-EtOAc 400:3) as colorless oil (796 mg, 3.44 mmol, 94%).  **$^1\text{H}$  NMR** (400 MHz,  $\text{CDCl}_3$ ):  $\delta = 10.47$  (s, 1H), 7.06 (dd,  $J = 1.9, 0.5$  Hz, 1H), 6.89 (d,  $J = 1.8$  Hz, 1H), 6.03 (ddt,  $J = 17.3, 10.6, 5.1$  Hz, 1H), 5.48 (dtd,  $J = 17.3, 1.7, 1.1$  Hz, 1H), 5.37 (dq,  $J = 10.6, 1.4$  Hz, 1H), 4.64 (dt,  $J = 5.1, 1.6$  Hz, 2H);  **$^{13}\text{C}$  NMR** (100 MHz,  $\text{CDCl}_3$ ):  $\delta = 188.0, 161.5, 140.4, 137.3, 131.4, 123.5, 121.2, 119.0, 112.5, 70.2$ ; **HRMS** ( $\text{ESI}^+$ ) calculated for  $\text{C}_{10}\text{H}_8\text{Cl}_2\text{O}_2 + \text{Na}^+$   $[\text{M} + \text{Na}]^+$ :  $m/z = 252.9794$ , found 252.9800.

### *N*-Allyl-*N*-(2-formylphenyl)benzamide (**10n**)<sup>5</sup>

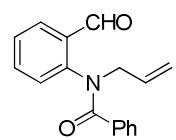 Following the general procedure, *N*-(2-formylphenyl)benzamide **8a** (1.00 g, 4.44 mmol, 1.0 equiv.) was treated with  $\text{K}_2\text{CO}_3$  (675 mg, 4.88 mmol, 1.1 equiv.) and allyl bromide (420  $\mu\text{L}$ , 4.88 mmol, 1.1 equiv.) in DMF (7.5 mL). The *N*-allyl-*N*-(2-formylphenyl)benzamide (**10n**) was isolated by column chromatography (petane-DCM-EtOAc 2:1:0.1) as colorless oil (1.11 g, 4.17 mmol, 94%).  **$^1\text{H}$  NMR** (400 MHz,  $\text{CDCl}_3$ ):  $\delta = 10.05$  (s, 1H), 7.70 (d,  $J = 7.8$  Hz, 1H), 7.54 (t,  $J = 7.8$  Hz, 1H), 7.34 (d,  $J = 7.8$  Hz, 1H), 7.28 – 7.07 (m, 6H), 6.00 (dd,  $J = 16.9, 8.8$  Hz, 1H), 5.14 (t,  $J = 14.6$  Hz, 2H), 4.55 (ddd,  $J = 69.0, 14.0, 6.4$  Hz, 2H);  **$^{13}\text{C}$  NMR** (100 MHz,  $\text{CDCl}_3$ ):  $\delta = 189.4, 170.5, 145.0, 135.3, 134.9$  (2C), 132.4, 132.0, 130.3, 130.1 (2C), 129.9, 128.6, 128.1, 128.0, 119.7, 54.2; **HRMS** ( $\text{ESI}^+$ ) calculated for  $\text{C}_{17}\text{H}_{15}\text{NO}_2 + \text{Na}^+$   $[\text{M} + \text{Na}]^+$ :  $m/z = 288.0995$ , found 288.0993.



### *N*-Allyl-*N*-(2-formylphenyl)-4-methylbenzenesulfonamide (**10o**)<sup>5</sup>

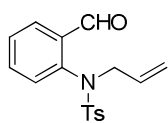

Following the general procedure, salicylaldehyde (1.30 g, 4.72 mmol, 1.0 equiv.) was treated with  $\text{K}_2\text{CO}_3$  (717 mg, 5.19 mmol, 1.1 equiv.) and allyl bromide (500  $\mu\text{L}$ , 5.19 mmol, 1.1 equiv.) in DMF (7.5 mL). The *N*-allyl-*N*-(2-formylphenyl)-4-methylbenzenesulfonamide (**10o**) was isolated by column chromatography (petane-DCM-EtOAc 2:1:0.1) as a white solid (1.44 g, 4.57 mmol, 97%).  $^1\text{H}$  NMR (400 MHz,  $\text{CDCl}_3$ ):  $\delta$  = 10.40 (s, 1H), 8.04 – 7.77 (m, 1H), 7.51 – 7.33 (m, 4H), 7.34 – 7.14 (m, 2H), 6.67 (dd,  $J$  = 7.7, 1.4 Hz, 1H), 5.70 (ddt,  $J$  = 16.9, 10.2, 6.8 Hz, 1H), 5.20 – 4.88 (m, 2H), 4.56 (br.s, 1H), 3.81 (br.s, 1H), 2.41 (s, 3H);  $^{13}\text{C}$  NMR (100 MHz,  $\text{CDCl}_3$ ):  $\delta$  = 190.2, 144.3, 141.3, 136.0, 134.2, 134.1, 131.6, 129.7 (2C), 128.6, 128.3, 127.9 (2C), 127.8, 120.5, 54.3, 21.6; HRMS (ESI<sup>+</sup>) calculated for  $\text{C}_{17}\text{H}_{17}\text{NO}_3\text{S}+\text{Na}^+$   $[\text{M}+\text{Na}]^+$ :  $m/z$  = 338.0821, found 338.0817.

### 2-(Prop-2-yn-1-yloxy)benzaldehyde (**10p**)<sup>7</sup>

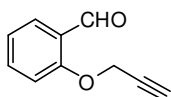

Following the general procedure, salicylaldehyde (1.00 g, 8.19 mmol, 1.0 equiv.) was treated with  $\text{K}_2\text{CO}_3$  (1.00 mL, 9.01 mmol, 1.1 equiv.) and propargyl bromide (80% in toluene; 1.00 mL, 9.01 mmol, 1.1 equiv.) in DMF (13 mL). The 2-(prop-2-yn-1-yloxy)benzaldehyde (**7l**) was isolated by column chromatography (petane-DCM 5:3) as colorless oil (1.28 g, 7.99 mmol, 98%).  $^1\text{H}$  NMR (300 MHz,  $\text{CDCl}_3$ ):  $\delta$  = 10.47 (s, 1H), 7.85 (dd,  $J$  = 7.7, 1.9 Hz, 1H), 7.56 (ddd,  $J$  = 8.4, 7.3, 1.9 Hz, 1H), 7.08 (ddt,  $J$  = 14.2, 7.5, 1.0 Hz, 2H), 4.82 (d,  $J$  = 2.4 Hz, 2H), 2.57 (t,  $J$  = 2.4 Hz, 1H);  $^{13}\text{C}$  NMR (75 MHz,  $\text{CDCl}_3$ ):  $\delta$  = 189.6, 159.8, 135.8, 128.6, 125.5, 121.8, 113.3, 77.8, 76.6, 56.4; HRMS (ESI<sup>+</sup>) calculated for  $\text{C}_{10}\text{H}_8\text{O}_2+\text{Na}^+$   $[\text{M}+\text{Na}]^+$ :  $m/z$  = 183.0417, found 183.0420.

### 5-Methyl-2-(prop-2-yn-1-yloxy)benzaldehyde (**10q**)<sup>6</sup>

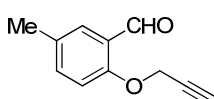

Following the general procedure, 5-methylsalicylaldehyde (739 mg, 5.43 mmol, 1.0 equiv.) was treated with  $\text{K}_2\text{CO}_3$  (825 mg, 5.97 mmol, 1.1 equiv.) and propargyl bromide (80% in toluene; 0.67 mL, 5.97 mmol, 1.1 equiv.) in DMF (4.7 mL). The 2-(allyloxy)-5-methylbenzaldehyde (**10q**) was isolated by column chromatography (petane-EtOAc 20:1) as a yellow solid (696 mg, 4.00 mmol, 74%).  $^1\text{H}$  NMR (300 MHz,  $\text{CDCl}_3$ ):  $\delta$  = 10.44 (s, 1H), 7.71 – 7.57 (m, 1H), 7.36 (ddd,  $J$  = 8.5, 2.4, 0.8 Hz, 1H), 7.01 (d,  $J$  = 8.5 Hz, 1H), 4.79 (d,  $J$  = 2.4 Hz, 2H), 2.55 (t,  $J$  = 2.4 Hz, 1H), 2.31 (t,  $J$  = 0.7 Hz, 3H);  $^{13}\text{C}$  NMR (75 MHz,  $\text{CDCl}_3$ ):  $\delta$  = 189.8, 158.0, 136.5, 131.3, 128.7, 125.3, 113.4, 78.0, 76.5, 56.6, 20.4; HRMS (ESI<sup>+</sup>): calculated for  $\text{C}_{11}\text{H}_{10}\text{O}_2+\text{Na}^+$   $[\text{M}+\text{Na}]^+$ :  $m/z$  = 197.0573, found 197.0586.

### 5-Methoxy-2-(prop-2-yn-1-yloxy)benzaldehyde (**10r**)<sup>6</sup>

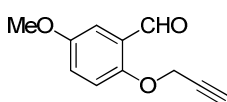

Following the general procedure, 5-methoxysalicylaldehyde (974mg, 6.40mmol, 1.0 equiv.) was treated with  $\text{K}_2\text{CO}_3$  (973 mg, 7.04 mmol, 1.1 equiv.) and propargyl bromide (80% in toluene; 0.82 mL, 7.04 mmol, 1.1 equiv.) in DMF (5 mL). The 2-

(allyloxy)-5-methylbenzaldehyde (**10r**) was isolated by column chromatography (petane-EtOAc 20:1) as a yellow solid (1.14 g, 6.01 mmol, 64%). <sup>1</sup>H NMR (300 MHz, CDCl<sub>3</sub>): δ = 10.44 (s, 1H), 7.34 (d, *J* = 3.2 Hz, 1H), 7.14 (dd, *J* = 9.1, 3.1 Hz, 1H), 7.07 (d, *J* = 9.0 Hz, 1H), 4.78 (d, *J* = 2.4 Hz, 2H), 3.80 (s, 3H), 2.55 (t, *J* = 2.4 Hz, 1H); <sup>13</sup>C NMR (75 MHz, CDCl<sub>3</sub>): δ = 189.5, 154.6, 154.5, 126.2, 123.4, 115.7, 110.5, 78.0, 76.5, 57.5, 55.9; HRMS (ESI<sup>+</sup>) calculated for C<sub>11</sub>H<sub>10</sub>O<sub>2</sub>+Na<sup>+</sup> [M+Na]<sup>+</sup>: *m/z* = 213.0522, found 213.0532.

### 5-Chloro-2-(prop-2-yn-1-yloxy)benzaldehyde (**10s**)<sup>6</sup>

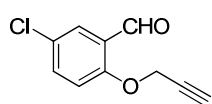

Following the general procedure, 5-chlorosalicylaldehyde (1.00 g, 6.40 mmol, 1.0 equiv.) was treated with K<sub>2</sub>CO<sub>3</sub> (973 mg, 7.04 mmol, 1.1 equiv.) and propargyl bromide (80% in toluene; 0.82 mL, 7.04 mmol, 1.1 equiv.) in DMF (5 mL). The 2-(allyloxy)-5-methylbenzaldehyde (**7b**) was isolated by column chromatography (petane-EtOAc 20:1) as a yellow solid (1.14 g, 6.01 mmol, 64%). <sup>1</sup>H NMR (300 MHz, CDCl<sub>3</sub>): δ = 10.39 (s, 1H), 7.79 (d, *J* = 2.8 Hz, 1H), 7.50 (dd, *J* = 8.9, 2.8 Hz, 1H), 7.08 (d, *J* = 8.9 Hz, 1H), 4.82 (d, *J* = 2.4 Hz, 2H), 2.59 (t, *J* = 2.4 Hz, 1H); <sup>13</sup>C NMR (75 MHz, CDCl<sub>3</sub>): δ = 188.3, 158.2, 135.3, 128.2, 127.5, 126.4, 115.1, 77.3, 77.1, 56.8; HRMS (ESI<sup>+</sup>) calculated for C<sub>10</sub>H<sub>7</sub>O<sub>2</sub>+Na<sup>+</sup> [M+Na]<sup>+</sup>: *m/z* = 217.0027, found 217.0027.

### General procedures for the synthesis of nitroolefins **2**

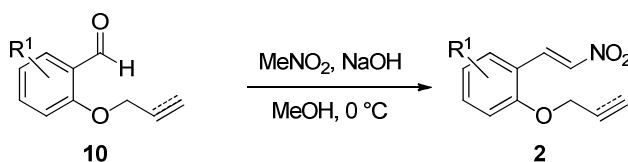

**Method A:**<sup>8</sup> Aldehyde **10** (1.0 equiv.) was treated with MeNO<sub>2</sub> (1 equiv.) and 10 M NaOH aq. solution (1.1 equiv.) in MeOH (4 M) at 0 °C for 15 min. Nitroolefin **2** was then isolated by column chromatography.

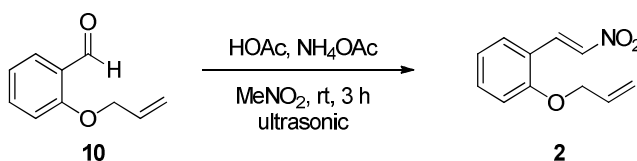

**Method B:**<sup>9</sup> Aldehyde **10** (1.0 equiv.) was treated with MeNO<sub>2</sub> (12.1 equiv.), AcOH (2.9 equiv.) and NH<sub>4</sub>OAc (2.2 equiv.) at rt under ultrasound irradiation for 3 h. The nitroolefin **2** was then isolated by column chromatography.

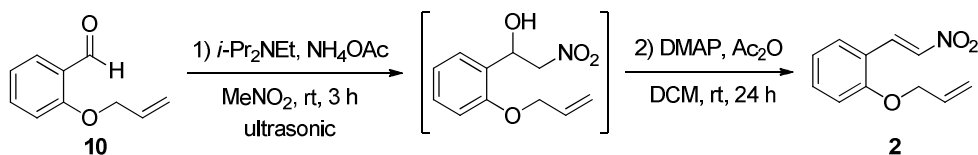

**Method C:**<sup>9</sup> Aldehyde **10** (1.0 equiv.) was treated with nitromethane (18.7 equiv.), diisopropylethylamine (0.1 equiv.) and NH<sub>4</sub>OAc (2.5 equiv.) at rt under ultrasound irradiation for 3 h. The generated crude alcohol was treated in CH<sub>2</sub>Cl<sub>2</sub> (0.1 M) with Ac<sub>2</sub>O (1.1 equiv.) in the presence of 4-dimethylaminopyridine (0.05 equiv.) for 24 h. The nitroolefin **2** was then isolated by column chromatography.



**(E)-1-(Allyloxy)-2-(2-nitrovinyl)benzene (2a)**<sup>10</sup>

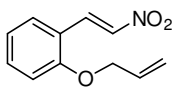 Following the general procedure **A**, aldehyde **10a** (3.80 g, 23.42 mmol, 1.0 equiv.) was treated with nitromethane (1.26 mL, 23.42 mmol, 1.0 equiv.) and 10 M NaOH aq. solution (2.6 mL, 25.76 mmol, 1.1 equiv.) in MeOH (6 mL). The corresponding nitroolefin **2a** was isolated by column chromatography (petane-DCM 4:1) as a yellow solid (2.80 g, 13.60 mmol, 58%). <sup>1</sup>H NMR (300 MHz, CDCl<sub>3</sub>): δ = 8.17 (d, *J* = 13.6 Hz, 1H), 7.88 (d, *J* = 13.6 Hz, 1H), 7.54 – 7.35 (m, 2H), 7.07 – 6.90 (m, 2H), 6.10 (ddt, *J* = 17.1, 10.6, 5.4 Hz, 1H), 5.44 (dq, *J* = 17.3, 1.5 Hz, 1H), 5.37 (dq, *J* = 10.5, 1.3 Hz, 1H), 4.68 (dt, *J* = 5.5, 1.5 Hz, 2H); <sup>13</sup>C NMR (75 MHz, CDCl<sub>3</sub>): δ = 158.6, 138.4, 135.6, 133.5, 132.5, 132.3, 121.4, 119.4, 119.0, 112.6, 69.5; HRMS (ESI<sup>+</sup>) calculated for C<sub>11</sub>H<sub>11</sub>NO<sub>3</sub>+Na<sup>+</sup> [M+Na]<sup>+</sup>: *m/z* = 228.0631, found 228.0636.

**(E)-1-(Allyloxy)-4-methyl-2-(2-nitrovinyl)benzene (2e)**

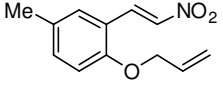 Following the general procedure **B**, aldehyde **10e** (916 mg, 5.20 mmol, 1.0 equiv.) was treated with nitromethane (3.40 mL, 63.00 mmol, 12.1 equiv.), acetic acid (0.86 mL, 15.08 mmol, 2.9 equiv.) and NH<sub>4</sub>OAc (882 mg, 11.44 mmol, 2.2 equiv.). The corresponding nitroolefin **2e** was isolated by column chromatography (petane-EtOAc 98:2→7:1) as a yellow solid (990 mg, 4.52 mmol, 87%). <sup>1</sup>H NMR (300 MHz, CDCl<sub>3</sub>): δ = 8.14 (d, *J* = 13.6 Hz, 1H), 7.87 (d, *J* = 13.6 Hz, 1H), 7.26 – 7.19 (m, 2H), 6.86 (d, *J* = 8.3 Hz, 1H), 6.08 (ddt, *J* = 17.3, 10.6, 5.4 Hz, 1H), 5.42 (dq, *J* = 17.3, 1.5 Hz, 1H), 5.35 (dq, *J* = 10.5, 1.3 Hz, 1H), 4.64 (dt, *J* = 5.4, 1.5 Hz, 2H), 2.31 (s, 3H); <sup>13</sup>C NMR (75 MHz, CDCl<sub>3</sub>): δ = 156.6, 138.2, 135.8, 134.1, 132.7, 132.5, 130.7, 119.1, 118.7, 112.6, 69.6, 20.4; HRMS (ESI<sup>+</sup>) calculated for C<sub>12</sub>H<sub>13</sub>NO<sub>3</sub>+Na<sup>+</sup> [M+Na]<sup>+</sup>: *m/z* = 242.0788, found 242.0785.

**(E)-1-(Allyloxy)-4-methoxy-2-(2-nitrovinyl)benzene (2f)**

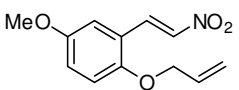 Following the general procedure **B**, aldehyde **10f** (1.41 g, 7.34 mmol, 1.0 equiv.) was treated with nitromethane (4.80 mL, 88.78 mmol, 12.1 equiv.), acetic acid (1.20 mL, 21.28, 2.9 equiv.) and NH<sub>4</sub>OAc (1.24 g, 16.14 mmol, 2.2 equiv.). The corresponding nitroolefin **2f** was isolated by column chromatography (petane-DCM 4:1→3:1) as a yellow solid (1.46 mg, 6.20 mmol, 85%). <sup>1</sup>H NMR (300 MHz, CDCl<sub>3</sub>): δ = 8.14 (d, *J* = 13.6 Hz, 1H), 7.85 (d, *J* = 13.6 Hz, 1H), 7.02 – 6.86 (m, 3H), 6.08 (ddt, *J* = 17.3, 10.6, 5.4 Hz, 1H), 5.42 (dq, *J* = 17.3, 1.5 Hz, 1H), 5.34 (dq, *J* = 10.5, 1.3 Hz, 1H), 4.62 (dt, *J* = 5.4, 1.5 Hz, 2H), 3.80 (s, 3H); <sup>13</sup>C NMR (75MHz, CDCl<sub>3</sub>): δ = 153.8, 153.0, 138.6, 135.4, 132.6, 120.0, 119.3, 118.7, 116.1, 114.0, 70.1, 56.0; HRMS (ESI) calculated for C<sub>12</sub>H<sub>13</sub>NO<sub>4</sub>+Na<sup>+</sup> [M+Na]<sup>+</sup>: *m/z* = 258.0737, found 258.0739.

**(E)-1-(Allyloxy)-5-methoxy-2-(2-nitrovinyl)benzene (2g)**

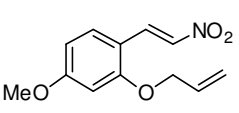 Following the general procedure **B**, aldehyde **10g** (620 mg, 3.20 mmol, 1.0 equiv.) was treated with nitromethane (2.10 mL, 39.03 mmol, 12.1 equiv.), acetic acid (0.53 mL, 9.28 mmol, 2.9 equiv.) and NH<sub>4</sub>OAc (543 mg, 7.04 mmol, 2.2 equiv.). The

corresponding nitroolefin **2g** was isolated by column chromatography (petane-DCM 5:1→3:1→1:1) as a yellow solid (685 mg, 2.91 mmol, 91%). **<sup>1</sup>H NMR** (300 MHz, CDCl<sub>3</sub>): δ = 8.12 (d, *J* = 13.5 Hz, 1H), 7.84 (d, *J* = 13.5 Hz, 1H), 7.39 (d, *J* = 8.6 Hz, 1H), 6.56 (dd, *J* = 8.6, 2.4 Hz, 1H), 6.48 (d, *J* = 2.3 Hz, 1H), 6.10 (ddt, *J* = 17.3, 10.7, 5.4 Hz, 1H), 5.44 (dq, *J* = 17.2, 1.5 Hz, 1H), 5.38 (dq, *J* = 10.5, 1.3 Hz, 1H), 4.65 (dt, *J* = 5.4, 1.4 Hz, 2H), 3.86 (s, 3H); **<sup>13</sup>C NMR** (75 MHz, CDCl<sub>3</sub>): δ = 164.4, 160.3, 136.2, 135.9, 134.4, 132.2, 119.1, 112.7, 106.3, 99.9, 69.7, 55.8; **HRMS** (ESI<sup>+</sup>) calculated for C<sub>12</sub>H<sub>13</sub>NO<sub>4</sub>+Na<sup>+</sup> [M+Na]<sup>+</sup>: *m/z* = 258.0737, found 258.0742.

**(*E*)-1-(Allyloxy)-6-methoxy-2-(2-nitrovinyl)benzene (2h)**

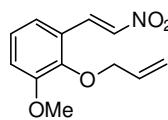

Following the general procedure **B**, aldehyde **10h** (1.31 g, 6.80 mmol, 1.0 equiv.) was treated with nitromethane (4.45 mL, 82.28 mmol, 12.1 equiv.), acetic acid (1.11 mL, 19.72 mmol, 2.9 equiv.) and NH<sub>4</sub>OAc (1.15 mg, 14.96 mmol, 2.2 equiv.). The corresponding nitroolefin **2h** was isolated by column chromatography (petane-DCM 4:1) as a yellow solid (1.17 mg, 4.97 mmol, 73%). **<sup>1</sup>H NMR** (300 MHz, CDCl<sub>3</sub>): δ = 8.22 (d, *J* = 13.7 Hz, 1H), 7.75 (d, *J* = 13.7 Hz, 1H), 7.14 – 6.98 (m, 3H), 6.07 (ddt, *J* = 17.1, 10.3, 6.1 Hz, 1H), 5.37 (dq, *J* = 17.1, 1.5 Hz, 1H), 5.27 (dq, *J* = 10.3, 1.1 Hz, 1H), 4.60 (dt, *J* = 6.1, 1.3 Hz, 2H), 3.89 (s, 3H); **<sup>13</sup>C NMR** (75 MHz, CDCl<sub>3</sub>): δ = 153.3, 148.1, 138.5, 135.0, 133.3, 124.6, 124.6, 121.3, 119.1, 115.8, 74.5, 56.0; **HRMS** (ESI<sup>+</sup>) calculated for C<sub>12</sub>H<sub>13</sub>NO<sub>4</sub>+Na<sup>+</sup> [M+Na]<sup>+</sup>: *m/z* = 258.0737, found 258.0738.

**(*E*)-1-(Allyloxy)-5-diethylamino-2-(2-nitrovinyl)benzene (2i)**

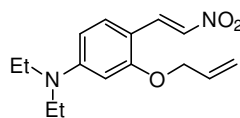

Following the general procedure **B**, aldehyde **10i** (933 mg, 4.00 mmol, 1.0 equiv.) was treated with nitromethane (2.62 mL, 48.40 mmol, 12.1 equiv.), acetic acid (0.66 mL, 11.60 mmol, 2.9 equiv.) and NH<sub>4</sub>OAc (678 mg, 8.80 mmol, 2.2 equiv.). The corresponding nitroolefin **2i** was isolated by column chromatography (petane-DCM 7:3→1:1) as a yellow solid (1.02 mg, 3.68 mmol, 92%). **<sup>1</sup>H NMR** (300 MHz, CDCl<sub>3</sub>): δ = 8.11 (d, *J* = 13.2 Hz, 1H), 7.77 (d, *J* = 13.2 Hz, 1H), 7.25 (d, *J* = 9.0 Hz, 1H), 6.29 (dd, *J* = 8.9, 2.4 Hz, 1H), 6.18 – 6.00 (m, 2H), 5.44 (dq, *J* = 17.3, 1.5 Hz, 1H), 5.35 (dq, *J* = 10.5, 1.3 Hz, 1H), 4.65 (dt, *J* = 5.5, 1.5 Hz, 2H), 3.41 (q, *J* = 7.1 Hz, 4H), 1.21 (t, *J* = 7.1 Hz, 6H). **<sup>13</sup>C NMR** (75 MHz, CDCl<sub>3</sub>): δ = 161.1, 152.3, 137.0, 134.8, 132.8, 132.7, 118.6, 107.3, 105.1, 94.9, 69.3, 45.0, 12.7; **HRMS** (ESI<sup>+</sup>) calculated for C<sub>15</sub>H<sub>20</sub>N<sub>2</sub>O<sub>3</sub>+Na<sup>+</sup> [M+Na]<sup>+</sup>: *m/z* = 299.1366, found 299.1367.

**(*E*)-2-(Allyloxy)-1-(2-nitrovinyl)naphthalene (2j)**

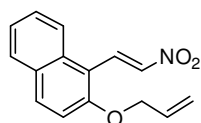

Following the general procedure **B**, aldehyde **10j** (620 mg, 3.20 mmol, 1.0 equiv.) was treated with nitromethane (2.62 mL, 48.40 mmol, 12.1 equiv.), acetic acid (0.66 mL, 11.60 mmol, 2.9 equiv.) and NH<sub>4</sub>OAc (678 mg, 8.80 mmol, 2.2 equiv.). The corresponding nitroolefin **2j** was isolated by column chromatography (petane-DCM 7:1) as a yellow solid (932 mg,

3.65 mmol, 91%). **<sup>1</sup>H NMR** (400 MHz, CDCl<sub>3</sub>): δ = 8.84 (d, *J* = 13.3 Hz, 1H), 8.24 – 8.10 (m, 2H), 7.94 (d, *J* = 9.1 Hz, 1H), 7.90 – 7.76 (m, 1H), 7.61 (ddd, *J* = 8.5, 6.9, 1.4 Hz, 1H), 7.44 (ddd, *J* = 8.0, 6.9, 1.0 Hz, 1H), 7.28 (d, *J* = 9.2 Hz, 1H), 6.14 (ddt, *J* = 17.3, 10.6, 5.4 Hz, 1H), 5.47 (dq, *J* = 17.3, 1.5 Hz, 1H), 5.40 (dq, *J* = 10.5, 1.3 Hz, 1H), 4.84 (dt, *J* = 5.4, 1.5 Hz, 2H); **<sup>13</sup>C NMR** (100 MHz, CDCl<sub>3</sub>): δ = 158.1, 140.5, 134.3, 133.5, 132.3, 131.0, 129.1, 129.1, 128.6, 124.7, 122.4, 119.3, 113.5, 112.0, 70.2; **HRMS** (ESI<sup>+</sup>) calculated for C<sub>15</sub>H<sub>13</sub>NO<sub>3</sub>+Na<sup>+</sup> [M+Na]<sup>+</sup>: *m/z* = 278.0788, found 278.0790.

**(*E*)-1-(Allyloxy)-4-fluoro-2-(2-nitrovinyl)benzene (2k)**

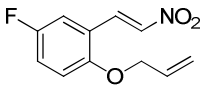 Following the general procedure **C**, aldehyde **10k** (1.19 g, 6.59 mmol, 1.0 equiv.) was treated with nitromethane (6.60 mL, 123 mmol, 18.7 equiv.), diisopropylethylamine (113 μL, 0.66 mmol, 0.1 equiv.) and NH<sub>4</sub>OAc (1.27 g, 16.5 mmol, 2.5 equiv.). The generated alcohol was treated with Ac<sub>2</sub>O (0.69 mL, 7.25 mmol, 1.1 equiv.) in the presence of 4-dimethylaminopyridine (40.3 mg, 0.33 mmol, 0.05 equiv.). The corresponding nitroolefin **2k** was isolated by column chromatography (petane-DCM 8:2) as a yellow solid (366 mg, 1.58 mmol, 24%). **<sup>1</sup>H NMR** (300 MHz, CDCl<sub>3</sub>): δ = 8.10 (d, *J* = 13.6 Hz, 1H), 7.81 (d, *J* = 13.6 Hz, 1H), 7.21 – 7.06 (m, 2H), 6.96 – 6.86 (m, 1H), 6.07 (ddt, *J* = 17.3, 10.6, 5.4 Hz, 1H), 5.43 (dq, *J* = 17.3, 1.5 Hz, 1H), 5.36 (dq, *J* = 10.5, 1.3 Hz, 1H), 4.64 (dt, *J* = 5.5, 1.5 Hz, 2H); **<sup>13</sup>C NMR** (75 MHz, CDCl<sub>3</sub>): δ = 156.8 (d, <sup>1</sup>*J* = 240.7 Hz), 154.7 (d, <sup>4</sup>*J* = 2.1 Hz), 139.2, 134.2 (d, <sup>4</sup>*J* = 2.4 Hz), 132.1, 120.4 (d, <sup>3</sup>*J* = 7.7 Hz), 119.7 (d, <sup>2</sup>*J* = 23.1 Hz), 119.1, 117.6 (d, <sup>2</sup>*J* = 23.6 Hz), 113.9 (d, <sup>3</sup>*J* = 8.0 Hz), 70.1; **<sup>19</sup>F NMR** (282 MHz, Chloroform-*d*): δ = -122.56; **HRMS** (ESI<sup>+</sup>) calculated for C<sub>11</sub>H<sub>10</sub>FNO<sub>3</sub>+Na<sup>+</sup> [M+Na]<sup>+</sup>: *m/z* = 246.0537, found 246.0539.

**(*E*)-1-(Allyloxy)-4-bromo-2-(2-nitrovinyl)benzene (2l)<sup>10</sup>**

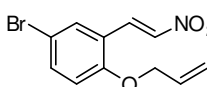 Following the general procedure **C**, aldehyde **10l** (1.67 g, 6.91 mmol, 1.0 equiv.) was treated with nitromethane (6.92 mL, 129.18 mmol, 18.7 equiv.), diisopropylethylamine (118 μL, 0.69 mmol, 0.1 equiv.) and NH<sub>4</sub>OAc (1.33 g, 17.27 mmol, 2.5 equiv.). The generated alcohol was treated with Ac<sub>2</sub>O (0.72 mL, 7.60 mmol, 1.1 equiv.) in the presence of 4-dimethylaminopyridine (42.2 mg, 0.35 mmol, 0.05 equiv.). The corresponding nitroolefin **2l** was isolated by column chromatography (petane-DCM 8:2) as a yellow solid (1.10 g, 3.85 mmol, 56%). **<sup>1</sup>H NMR** (300 MHz, CDCl<sub>3</sub>): δ = 8.00 (d, *J* = 13.6 Hz, 1H), 7.75 (d, *J* = 13.7 Hz, 1H), 7.50 (d, *J* = 2.5 Hz, 1H), 7.43 (dd, *J* = 8.9, 2.5 Hz, 1H), 6.78 (d, *J* = 8.9 Hz, 1H), 6.00 (ddt, *J* = 17.3, 10.7, 5.4 Hz, 1H), 5.40 – 5.28 (m, 2H), 4.59 (dt, *J* = 5.4, 1.5 Hz, 2H); **<sup>13</sup>C NMR** (75 MHz, CDCl<sub>3</sub>): δ = 157.4, 139.2, 135.7, 134.3, 133.9, 131.8, 121.3, 119.3, 114.4, 113.4, 69.9; **HRMS** (ESI<sup>+</sup>) calculated for C<sub>11</sub>H<sub>10</sub>BrNO<sub>3</sub>+Na<sup>+</sup> [M+Na]<sup>+</sup>: *m/z* = 305.9736, found 305.9729.

**(*E*)-1-(allyloxy)-3,5-dichloro-2-(2-nitrovinyl)benzene (2m)**

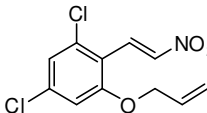 Following the general procedure **B**, aldehyde **10m** (749 mg, 3.24 mmol, 1.0 equiv.) was treated with nitromethane (2.1 mL, 39.2 mmol, 12.1 equiv.), acetic acid (0.54 mL,

9.40 mmol, 2.9 equiv.) and  $\text{NH}_4\text{OAc}$  (549 mg, 7.13 mmol, 2.2 equiv.). The corresponding nitroolefin **2m** was isolated by column chromatography (petane-DCM 8:1) as a yellow solid (533 mg, 1.94 mmol, 60%).  **$^1\text{H}$  NMR** (300 MHz,  $\text{CDCl}_3$ ):  $\delta$  = 8.42 (d,  $J$  = 13.6 Hz, 1H), 8.05 (d,  $J$  = 13.6 Hz, 1H), 7.16 (d,  $J$  = 1.9 Hz, 1H), 6.89 (d,  $J$  = 1.9 Hz, 1H), 6.08 (ddt,  $J$  = 17.2, 10.4, 5.5 Hz, 1H), 5.47 (dq,  $J$  = 10.0, 1.2 Hz, 1H), 5.42 (dq,  $J$  = 3.3, 1.2 Hz, 1H), 4.69 (dt,  $J$  = 5.5, 1.4 Hz, 2H);  **$^{13}\text{C}$  NMR** (75 MHz,  $\text{CDCl}_3$ ):  $\delta$  = 159.3, 140.9, 138.2, 138.1, 130.6, 130.0, 122.7, 119.9, 116.3, 111.6, 70.6; **HRMS** ( $\text{ESI}^+$ ) calculated for  $\text{C}_{11}\text{H}_9\text{Cl}_2\text{NO}_3 + \text{Na}^+$   $[\text{M} + \text{Na}]^+$ :  $m/z$  = 295.9852, found 295.9858.

**(E)-N-Allyl-N-(2-(2-nitrovinyl)phenyl)benzamide (2n)**

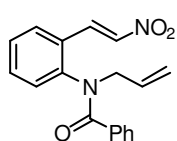

Following the general procedure **A**, aldehyde **10n** (660 mg, 2.48 mmol, 1.0 equiv.) was treated with nitromethane (140  $\mu\text{L}$ , 2.48 mmol, 1.0 equiv.) and 10 M  $\text{NaOH}$  aq. solution (0.27 mL, 2.73 mmol, 1.1 equiv.) in MeOH (1 mL). The corresponding nitroolefine **2n** was isolated by column chromatography (petane-EtOAc 6:1 $\rightarrow$ 3:1) as a yellow solid (534 mg, 1.73 mmol, 80%).  **$^1\text{H}$  NMR** (300 MHz,  $\text{CDCl}_3$ ):  $\delta$  = 8.04 (d,  $J$  = 13.6 Hz, 1H), 7.56 – 7.00 (m, 10H), 6.02 (dq,  $J$  = 16.5, 7.5 Hz, 1H), 5.23 – 5.09 (m, 2H), 4.64 (dd,  $J$  = 14.3, 6.5 Hz, 1H), 4.34 (dd,  $J$  = 14.2, 7.0 Hz, 1H);  **$^{13}\text{C}$  NMR** (75 MHz,  $\text{CDCl}_3$ ):  $\delta$  = 138.6, 135.3, 134.4, 132.8, 131.9 (2C), 130.3 (2C), 128.5 (2C), 128.5 (2C), 128.4, 128.2, 128.0 (2C), 119.9, 54.0; **HRMS** ( $\text{ESI}^+$ ) calculated for  $\text{C}_{18}\text{H}_{16}\text{N}_2\text{O}_3 + \text{Na}^+$   $[\text{M} + \text{Na}]^+$ :  $m/z$  = 331.1053, found 331.1054.

**(E)-N-Allyl-4-Methyl-N-(2-(2-nitrovinyl)phenyl)benzenesulfonamide (2o)**

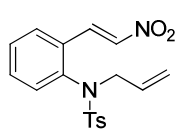

Following the general procedure **A**, aldehyde **10o** (1.00 g, 3.17 mmol, 1.0 equiv.) was treated with nitromethane (178  $\mu\text{L}$ , 3.33 mmol, 1.05 equiv.) and 10 M  $\text{NaOH}$  aq. solution (0.35 mL, 3.49 mmol, 1.1 equiv.) in MeOH (0.78 mL). The corresponding nitroolefin **2o** was isolated by column chromatography (petane-DCM-EtOAc 4:1:0.1) as a yellow solid (357 mg, 1.00 mmol, 31%).  **$^1\text{H}$  NMR** (300 MHz,  $\text{CDCl}_3$ ):  $\delta$  = 8.21 (d,  $J$  = 13.8 Hz, 1H), 7.64 – 7.58 (m, 1H), 7.54 (d,  $J$  = 8.3 Hz, 2H), 7.48 (d,  $J$  = 13.8 Hz, 1H), 7.42 – 7.36 (m, 2H), 7.29 (d,  $J$  = 8.1 Hz, 2H), 6.94 – 6.83 (m, 1H), 5.74 (ddt,  $J$  = 16.9, 10.0, 6.8 Hz, 1H), 5.13 – 4.85 (m, 2H), 4.44 (br.s, 1H), 3.94 (br.s, 1H), 2.44 (s, 3H);  **$^{13}\text{C}$  NMR** (75 MHz,  $\text{CDCl}_3$ ):  $\delta$  = 144.5, 139.7, 138.4, 135.2, 134.9, 132.3, 132.0, 131.8, 130.1, 129.9 (2C), 129.2, 128.2 (2C), 128.0, 120.6, 55.0, 21.7; **HRMS** ( $\text{ESI}^+$ ) calculated for  $\text{C}_{18}\text{H}_{18}\text{N}_2\text{O}_4\text{S} + \text{Na}^+$   $[\text{M} + \text{Na}]^+$ :  $m/z$  = 381.0879, found 381.0878.

**(E)-1-(2-Nitrovinyl)-2-(prop-2-yn-1-yloxy)benzene (2p)<sup>7</sup>**

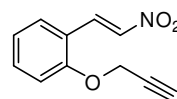

Following the general procedure **B**, aldehyde **10p** (1.00 g, 6.24 mmol, 1.0 equiv.) was treated with nitromethane (4.04 mL, 75.5 mmol, 12.1 equiv.), acetic acid (1.03 mL, 18.10 mmol, 2.9 equiv.) and  $\text{NH}_4\text{OAc}$  (1.06 g, 13.73 mmol, 2.2 equiv.). The corresponding nitroolefin **2p** was isolated by column chromatography (petane-DCM 8:2) as a yellow solid (938 mg, 4.62 mmol, 74%).  **$^1\text{H}$  NMR** (300 MHz,  $\text{CDCl}_3$ ):  $\delta$  = 8.15 (d,  $J$  = 13.6 Hz, 1H), 7.85 (d,  $J$  = 13.6 Hz, 1H), 7.54 – 7.40 (m, 2H), 7.16 – 7.00 (m, 2H),

4.84 (d,  $J = 2.4$  Hz, 2H), 2.59 (t,  $J = 2.4$  Hz, 1H);  $^{13}\text{C}$  NMR (75 MHz,  $\text{CDCl}_3$ ):  $\delta = 157.3, 138.6, 135.18, 133.4, 132.4, 122.1, 119.7, 112.8, 77.5, 76.8, 56.3$ ; HRMS (ESI $^+$ ): calculated for  $\text{C}_{11}\text{H}_9\text{NO}_3 + \text{Na}^+$   $[\text{M} + \text{Na}]^+$ :  $m/z = 226.0475$ , found 226.0476.

**(E)-4-Methyl-2-(2-nitrovinyl)-1-(prop-2-yn-1-yloxy)benzene (2q)**

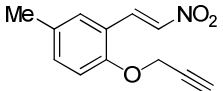 Following the general procedure **B**, aldehyde **10q** (650 mg, 3.73 mmol, 1.0 equiv.) was treated with nitromethane (2.42 mL, 45.13 mmol, 12.1 equiv.), acetic acid (0.62 mL, 10.82 mmol, 2.9 equiv.) and  $\text{NH}_4\text{OAc}$  (633 mg, 8.21 mmol, 2.2 equiv.). The corresponding nitroolefin **2q** was isolated by column chromatography (petane-DCM 3:1) as a yellow solid (651 mg, 2.99 mmol, 80%).  $^1\text{H}$  NMR (300 MHz,  $\text{CDCl}_3$ ):  $\delta = 8.13$  (d,  $J = 13.7$  Hz, 1H), 7.84 (d,  $J = 13.6$  Hz, 1H), 7.34 – 7.18 (m, 2H), 6.99 (d,  $J = 8.9$  Hz, 1H), 4.81 (d,  $J = 2.4$  Hz, 2H), 2.56 (t,  $J = 2.4$  Hz, 1H), 2.32 (s, 3H);  $^{13}\text{C}$  NMR (75 MHz,  $\text{CDCl}_3$ ):  $\delta = 155.4, 138.5, 135.4, 134.0, 132.6, 131.5, 119.5, 112.9, 76.6, 56.4, 20.4$ ; HRMS (ESI $^+$ ): calculated for  $\text{C}_{12}\text{H}_{11}\text{NO}_3 + \text{Na}^+$   $[\text{M} + \text{Na}]^+$ :  $m/z = 240.0631$ , found 240.0639.

**(E)-4-Methoxy-2-(2-nitrovinyl)-1-(prop-2-yn-1-yloxy)benzene (2r)**

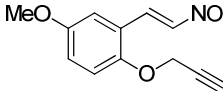 Following the general procedure **B**, aldehyde **10r** (1.12 g, 5.89 mmol, 1.0 equiv.) was treated with nitromethane (3.82 mL, 71.25 mmol, 12.1 equiv.), acetic acid (0.98 mL, 17.08 mmol, 2.9 equiv.) and  $\text{NH}_4\text{OAc}$  (999 mg, 12.96 mmol, 2.2 equiv.). The corresponding nitroolefin **2r** was isolated by column chromatography (petane-DCM 2:1) as a yellow solid (1.14 g, 4.90 mmol, 83%).  $^1\text{H}$  NMR (300 MHz,  $\text{CDCl}_3$ ):  $\delta = 8.13$  (d,  $J = 13.6$  Hz, 1H), 7.82 (d,  $J = 13.6$  Hz, 1H), 7.16 – 6.86 (m, 3H), 4.78 (d,  $J = 2.4$  Hz, 2H), 3.81 (s, 3H), 2.56 (t,  $J = 2.4$  Hz, 1H);  $^{13}\text{C}$  NMR (75 MHz,  $\text{CDCl}_3$ ):  $\delta = 154.3, 151.7, 138.8, 135.0, 120.5, 119.0, 116.1, 114.4, 77.9, 76.6, 56.9, 56.0, 20.4$ ; HRMS (ESI $^+$ ): calculated for  $\text{C}_{12}\text{H}_{11}\text{NO}_4 + \text{Na}^+$   $[\text{M} + \text{Na}]^+$ :  $m/z = 256.0580$ , found 256.0580.

**(E)-4-Chloro-2-(2-nitrovinyl)-1-(prop-2-yn-1-yloxy)benzene (2s)**

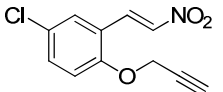 Following the general procedure **A**, aldehyde **10s** (1.18 g, 6.06 mmol, 1.0 equiv.) was treated with nitromethane (341  $\mu\text{L}$ , 6.36 mmol, 1.05 equiv.) and 10 M NaOH aq. solution (666  $\mu\text{L}$ , 6.67 mmol, 1.1 equiv.) in MeOH (1.38 mL). The corresponding nitroolefin **2s** was isolated by column chromatography (petane-DCM 4:1) as a yellow solid (1.08 g, 4.55 mmol, 75%).  $^1\text{H}$  NMR (300 MHz,  $\text{CDCl}_3$ ):  $\delta = 8.08$  (d,  $J = 13.7$  Hz, 1H), 7.81 (d,  $J = 13.7$  Hz, 1H), 7.49 – 7.38 (m, 2H), 7.05 (d,  $J = 8.8$  Hz, 1H), 4.83 (d,  $J = 2.4$  Hz, 2H), 2.59 (t,  $J = 2.4$  Hz, 1H);  $^{13}\text{C}$  NMR (75 MHz,  $\text{CDCl}_3$ ):  $\delta = 155.7, 139.4, 133.6, 132.7, 131.2, 127.1, 121.2, 114.3, 77.2, 77.1, 56.7$ ; HRMS (ESI $^+$ ): calculated for  $\text{C}_{11}\text{H}_8\text{ClNO}_3 + \text{Na}^+$   $[\text{M} + \text{Na}]^+$ :  $m/z = 260.0085$ , found 260.0086.

# Optimization of the model organocatalyzed asymmetric reaction<sup>[a]</sup>

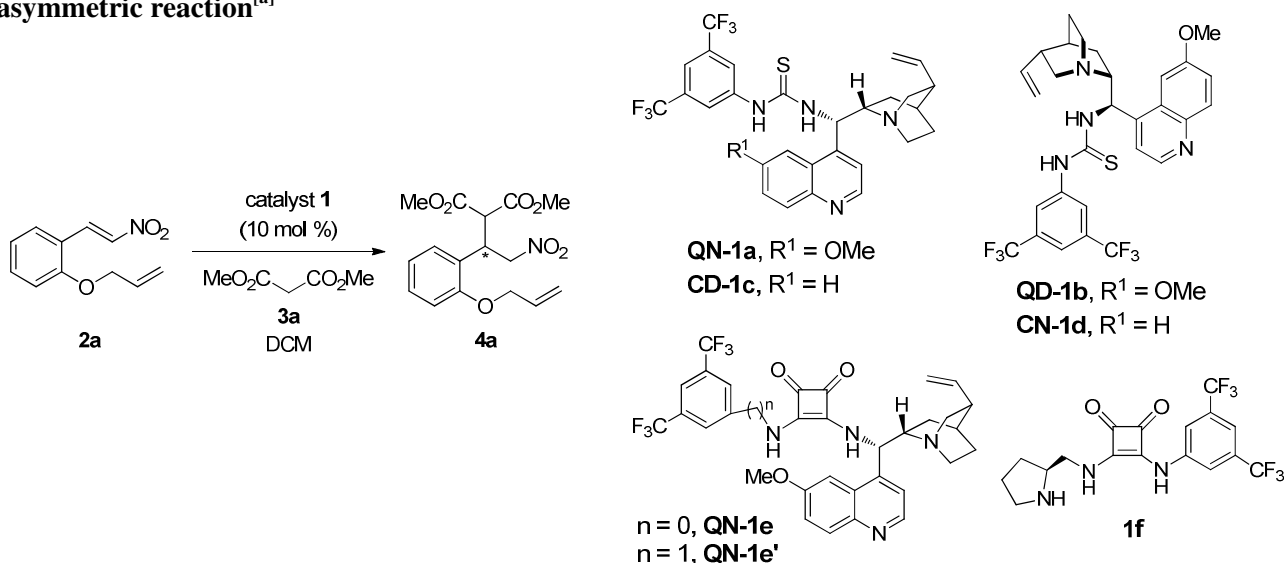

| entry | 1            | Temp. (°C)            | time (d) | yield (%) <sup>[b]</sup> | Ee (%) <sup>[c]</sup> | (Conf.)      |
|-------|--------------|-----------------------|----------|--------------------------|-----------------------|--------------|
| 1     | <b>QN-1a</b> | 30                    | 3        | 99                       | -90                   | ( <i>S</i> ) |
| 2     | <b>QD-1b</b> | 30                    | 3        | 99                       | 92                    | ( <i>R</i> ) |
| 3     | <b>CD-1c</b> | 30                    | 3        | 99                       | -92                   | ( <i>S</i> ) |
| 4     | <b>CN-1d</b> | 30                    | 3        | 99                       | 91                    | ( <i>R</i> ) |
| 5     | <b>QN-1e</b> | 30                    | 3        | 99                       | -74                   | ( <i>S</i> ) |
| 6     | <b>1f</b>    | 30                    | 3        | <10                      | 0                     | 0            |
| 7     | <b>QD-1b</b> | 10                    | 4        | 99                       | 95                    | ( <i>R</i> ) |
| 8     | <b>QD-1b</b> | 10 <sup>[d]</sup>     | 7        | 99                       | 96                    | ( <i>R</i> ) |
| 9     | <b>QD-1b</b> | 10 <sup>[d],[e]</sup> | 7        | 99                       | 96                    | ( <i>R</i> ) |

<sup>[a]</sup> Catalyst **1** (10 mol %), **2a** (0.1 mmol) and **3** (0.12 mmol) in DCM (0.5 mL, 0.2 M). <sup>[b]</sup> GC-yield. <sup>[c]</sup> Ee determined by chiral HPLC. <sup>[d]</sup> Reaction in *o*-xylene. <sup>[e]</sup> Same results for the reactions in 1 mL *o*-xylene (0.1 M) and 0.2 mL (0.5 M).

An ordinary vial equipped with a magnetic stirring bar was charged with catalyst **1** (10 mol%), malonate **3** (0.24 mmol), nitroolefin **2** (0.20 mmol) and *o*-xylene (1.0 mL) at 10 °C. The stirring was maintained at 10 °C for 7 d. The crude reaction mixture was directly charged onto silica-gel and purified by column chromatography.

The corresponding racemic products were prepared using DABCO (leading to very low yields) or a 1:1 mixture of pseudoenantiomers of the thiourea-chinona derivatives in CH<sub>2</sub>Cl<sub>2</sub> at 40 °C for 3 d.

## (*R*)-Dimethyl 2-(1-(2-(allyloxy)phenyl)-2-nitroethyl)malonate (**4a**)

According to the general procedure using 10 mol% of catalyst **1b**, the title compound **4a** was obtained after FC (petane-EtOAc 6:1) as a white solid (99%, 96% ee).  $[\alpha]_D^{20} = -21.7$  (*c* 1.05 CHCl<sub>3</sub>); <sup>1</sup>H NMR (400 MHz, CDCl<sub>3</sub>):  $\delta = 7.22$  (ddd, *J* = 8.1, 7.5, 1.7 Hz, 1H), 7.15 (dd, *J* = 7.6, 1.7 Hz, 1H), 6.92 – 6.81 (m, 2H), 6.08 (ddt, *J* = 17.3, 10.5, 5.2 Hz, 1H), 5.43 (dq, *J* = 17.3, 1.6 Hz, 1H), 5.32 (dq, *J* = 10.6, 1.4 Hz, 1H), 5.06 (dd, *J* = 13.0, 9.1 Hz, 1H), 4.89 (dd, *J* = 13.0, 4.6 Hz, 1H),



4.65 – 4.54 (m, 2H), 4.42 (td,  $J = 9.5, 4.6$  Hz, 1H), 4.21 (d,  $J = 9.9$  Hz, 1H), 3.75 (s, 3H), 3.50 (s, 3H);  $^{13}\text{C}$  NMR (100 MHz,  $\text{CDCl}_3$ ):  $\delta = 168.4, 167.7, 156.4, 132.9, 130.8, 129.7, 123.9, 121.1, 118.1, 112.4, 76.1, 69.2, 53.0, 52.7, 52.7, 40.5$ ; HRMS (ESI $^+$ ) calculated for  $\text{C}_{16}\text{H}_{19}\text{NO}_7 + \text{Na}^+$   $[\text{M} + \text{Na}]^+$ :  $m/z = 360.1054$ , found 360.1051. IR:  $\nu_{\text{max}}$  3027, 2960, 2875, 2360, 2337, 1757, 1723, 1600, 1587, 1552, 1495, 1457, 1433, 1379, 1365, 1348, 1332, 1307, 1288, 1229, 1197, 1170, 1121, 1084, 1067, 1011, 999, 984, 937, 924, 851, 837, 762; HPLC: OD-H, Pentane:*i*-PrOH 90:10,  $F = 1.0$  mL/min,  $\lambda = 230$  nm,  $t_{\text{R}}$  minor (*S*) = 10.3 min,  $t_{\text{R}}$  major (*R*) = 15.1 min.

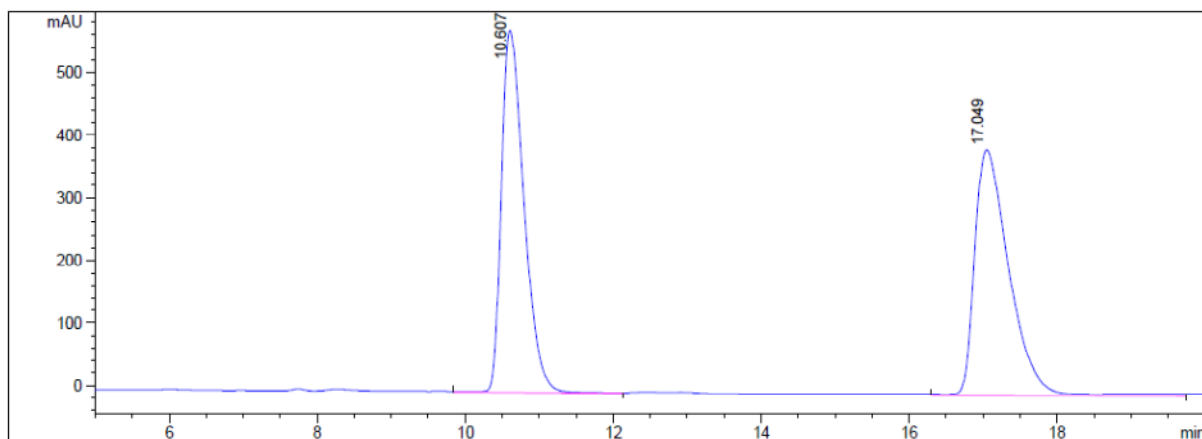

| # | Meas. Ret. Time | Height  | Height % | Area      | Area % |
|---|-----------------|---------|----------|-----------|--------|
| 1 | 10.607          | 577.765 | 59.559   | 12287.461 | 49.099 |
| 2 | 17.049          | 392.306 | 40.441   | 12738.391 | 50.901 |

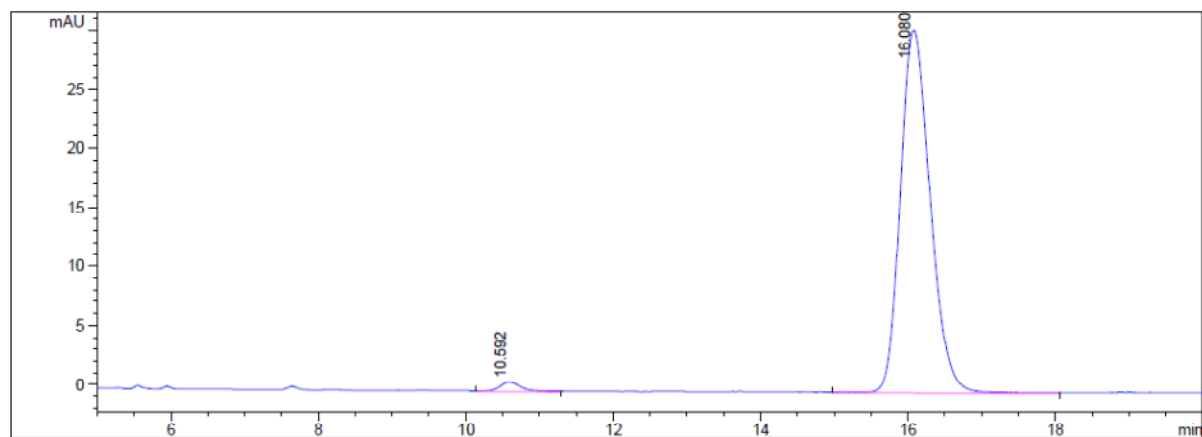

| # | Meas. Ret. Time | Height | Height % | Area    | Area % |
|---|-----------------|--------|----------|---------|--------|
| 1 | 10.592          | 0.828  | 2.622    | 17.675  | 1.999  |
| 2 | 16.080          | 30.742 | 97.378   | 866.649 | 98.001 |

## Optimization and general procedure for the nitrile cycloaddition reaction

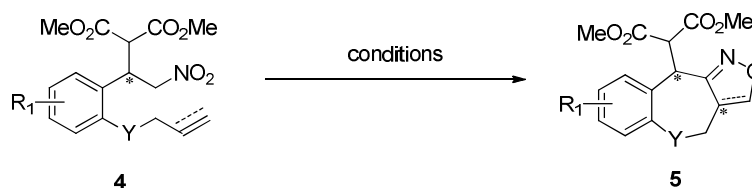

| Entry | reagent (equiv.)         | additive          | Solvent           | time (h) | Temp.      | Yield (%) <sup>[a]</sup> | Ee (%) <sup>[d]</sup> |
|-------|--------------------------|-------------------|-------------------|----------|------------|--------------------------|-----------------------|
| 1     | ClCO <sub>2</sub> Et (2) | Et <sub>3</sub> N | Benzene           | 6 h      | 90 °C      | 30                       | Nd                    |
| 2     | PhSO <sub>2</sub> Cl (2) | Et <sub>3</sub> N | CHCl <sub>3</sub> | 15 h     | 0 °C à rt  | 40                       | Nd                    |
| 3     | PhNCO (1.8)              | Et <sub>3</sub> N | Benzene           | 4 h      | rt à 90 °C | 72 <sup>[b]</sup>        | Nd                    |
| 4     | Boc <sub>2</sub> O (2.5) | DMAP              | MeCN              | 3.5 h    | 60 °C      | 32                       | Nd                    |
| 5     | Boc <sub>2</sub> O (2.5) | DMAP              | DCM               | 3.5 h    | 60 °C      | traces                   | Nd                    |
| 6     | Boc <sub>2</sub> O (2.5) | DMAP              | Toluene           | 3.5 h    | 90 °C      | 60(75) <sup>[c]</sup>    | 96 <sup>[e]</sup>     |
| 7     | Boc <sub>2</sub> O (2.5) | DMAP              | Toluene           | 24 h     | 90 °C      | 40%                      | Nd                    |
| 8     | Ac <sub>2</sub> O (2.5)  | DMAP              | Toluene           | 3.5 h    | 90 °C      | 57%                      | Nd                    |

<sup>[a]</sup> Isolated yields. <sup>[b]</sup> **5a** together with inseparable byproducts. <sup>[c]</sup> NMR yield in brackets. <sup>[d]</sup> Ee determined by HPLC.

<sup>[e]</sup> Starting from **4a** with 96% ee. N.d. = not determined.

### General Procedure with Boc<sub>2</sub>O and DMAP:

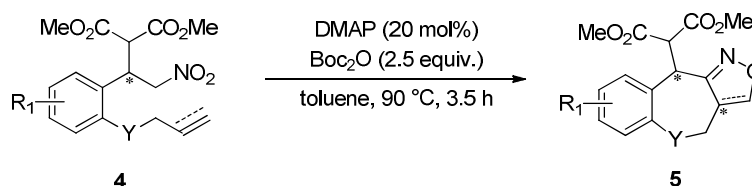

Nitro compound **4** (0.2 mmol, 1.0 equiv.) and DMAP (0.04 mmol, 0.2 equiv.) were dissolved in freshly distilled toluene and heated to 90 °C. To the hot reaction mixture, a solution of Boc<sub>2</sub>O in toluene (0.5 M, 1.0 mL, 2.5 equiv.) was added over 20 min. The reaction was then allowed to proceed for further 3.5 h at 90 °C. After cooling to room temperature, the crude reaction mixture was directly charged onto silica-gel and purified by column chromatography.

### General procedure for the one-pot reaction

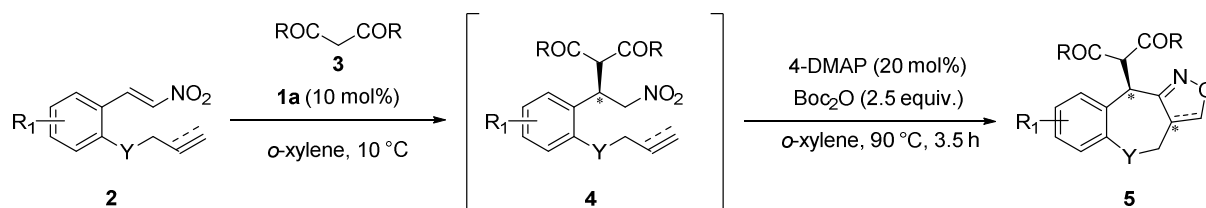

A schlenk tube was charged with catalyst **1** (10 mol%), malonate or diketone **3** (0.24 mmol), nitroolefin **2** (0.20 mmol) and dry *o*-xylene (1.0 mL) at 10 °C. The stirring was maintained at 10 °C for 7 d. Then, 0.1 mL of

a solution of 4-DMAP (4.9 mg, 0.04 mmol, 0.2 equiv.) and Boc<sub>2</sub>O (109.1 mg, 0.5 mmol, 2.5 equiv.) in dry *o*-xylene (1.0 mL) was added at room temperature and the mixture stirred for 5 min. The reaction mixture was then heated at 90 °C and the rest of the solution (0.9 mL) added dropwise. (Alternatively, the reaction mixture was added dropwise to a mixture of DMAP and Boc<sub>2</sub>O in *o*-xylene heated at 90 °C). The reaction was then allowed to proceed for further 3.5 h at 90 °C. After cooling to room temperature the crude reaction mixture was directly charged onto silica-gel and purified by column chromatography.

**Dimethyl 2-((3a*R*,10*R*)-3,3a,4,10-tetrahydrobenzo[6,7]oxepino[4,3-*c*]isoxazol-10-yl)malonate (5a)**

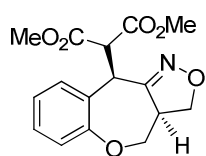

Following the general procedure, the title compound **5a** was obtained after FC (petane-EtOAc 8:1) as a white solid (61%) and a 3:1 mixture of diastereoisomers (96% ee each). <sup>1</sup>H NMR (300 MHz, CDCl<sub>3</sub>): δ = 7.36 – 6.94 (m, 4H major + 4H minor), 4.88 (d, *J* = 11.8 Hz, 1H major), 4.67 (d, *J* = 11.8 Hz, 1H minor), 4.56 – 4.41 (m, 2H major + 2H minor), 4.40 – 4.28 (m, 1H major + 1H minor), 3.79 (s, 3H major), 3.76 (s, 3H minor), 3.62 (s, 3H major), 3.50 (s, 3H minor) 3.92-3.50 (m, 3H major + 2H minor); <sup>13</sup>C NMR (75 MHz, CDCl<sub>3</sub>): Major isomer: δ = 168.1, 167.8, 158.1, 132.0, 130.1, 129.6, 126.8, 125.5, 122.7, 74.1, 70.5, 53.3, 53.1, 53.1, 51.6, 39.5; Minor isomer: δ = 167.4, 167.2, 156.7, 131.9, 131.2, 130.0, 128.8, 125.2, 122.8, 74.5, 70.4, 53.8, 53.2, 52.7, 50.2, 44.0; HRMS (ESI<sup>+</sup>) calculated for C<sub>16</sub>H<sub>17</sub>NO<sub>6</sub>+Na<sup>+</sup> [M+Na]<sup>+</sup>: *m/z* = 342.0948, found 342.0950; IR: ν<sub>max</sub> 3075, 2957, 2889, 2360, 1738, 1718, 1635, 1603, 1579, 1488, 1453, 1438, 1431, 1352, 1325, 1312, 1294, 1282, 1267, 1240, 1223, 1199, 1178, 1148, 1008, 890, 875, 788, 774; HPLC: IC, Pentane:*i*-PrOH 65:35, F = 1.0 mL/min, λ = 230 nm: Major isomer: *t*<sub>R</sub> minor = 20.3 min, *t*<sub>R</sub> major = 54.7 min; Minor isomer: *t*<sub>R</sub> major = 16.7 min, *t*<sub>R</sub> minor = 25.0 min.

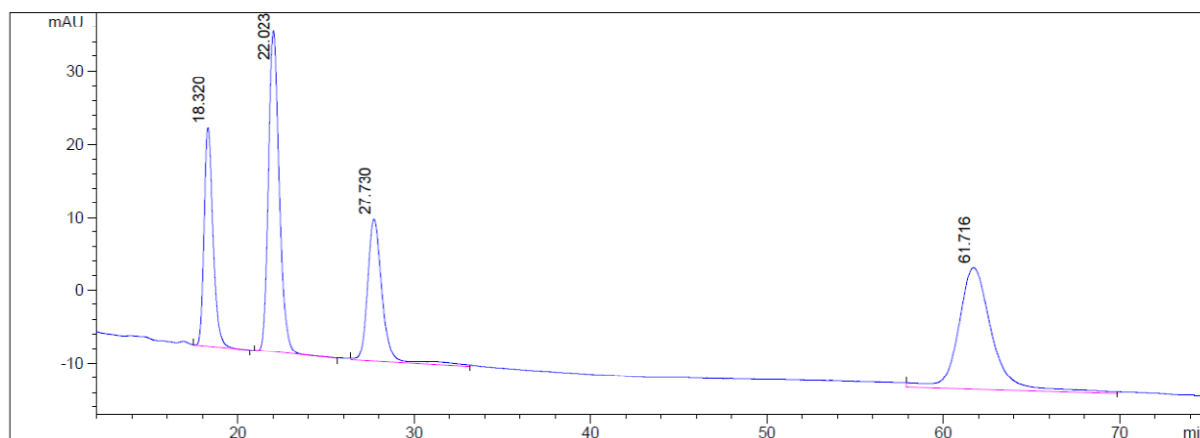

| # | Meas. Ret. Time | Height | Height % | Area     | Area % |
|---|-----------------|--------|----------|----------|--------|
| 1 | 18.320          | 29.879 | 27.203   | 1051.312 | 16.893 |
| 2 | 22.023          | 43.883 | 39.953   | 1864.406 | 29.958 |
| 3 | 27.730          | 19.500 | 17.754   | 1131.214 | 18.177 |
| 4 | 61.716          | 16.573 | 15.089   | 2176.367 | 34.971 |

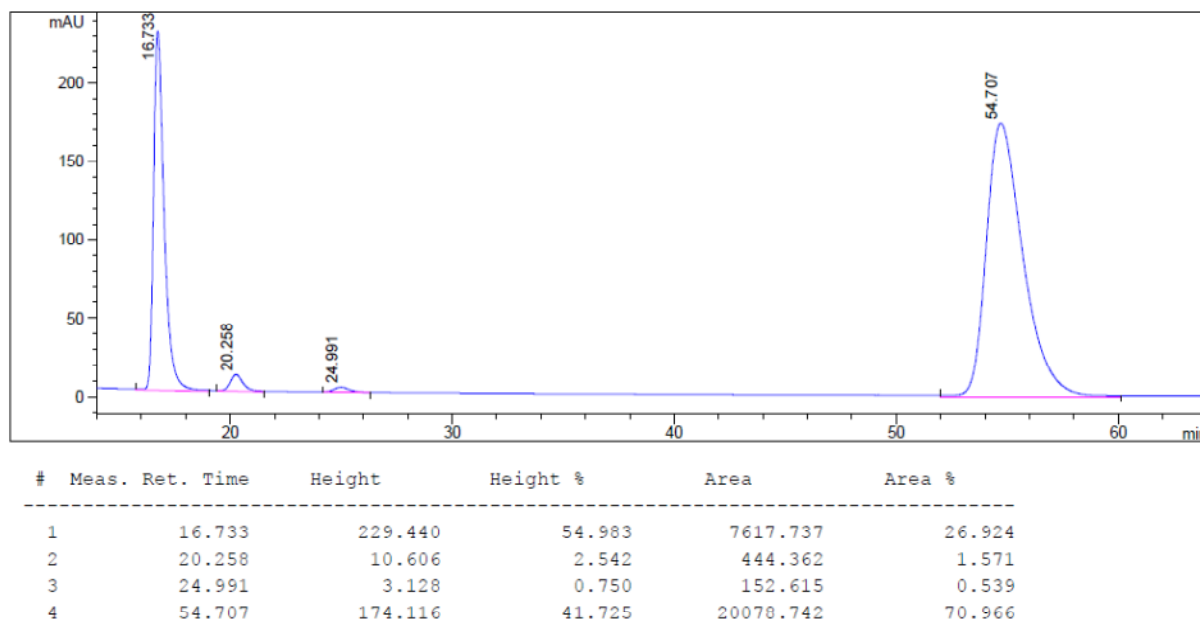

**Dimethyl 2-((3a*S*,10*S*)-3,3a,4,10-tetrahydrobenzo[6,7]oxepino[4,3-*c*]isoxazol-10-yl)malonate (*ent*-5a)**

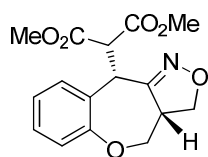

Following the general procedure, the title compound *ent*-5a was obtained after FC (petane-EtOAc 8:1) as a white solid (75%) and a 2.8:1 mixture of diastereoisomers (97% ee each).

**<sup>1</sup>H NMR** (400 MHz, CDCl<sub>3</sub>): δ = 7.32 (dd, *J* = 7.6, 1.7 Hz, 1H, minor), 7.30 – 7.19 (m, 2H major + 2H minor), 7.19 (dd, *J* = 7.8, 2.1 Hz, 1H, major), 7.12 (dd, *J* = 7.5, 1.4 Hz, 1H, major), 7.12 – 7.03 (m, 1H major + 1H minor), 7.01 (dd, *J* = 8.0, 1.3 Hz, 1H, minor), 4.89 (d, *J* = 11.8 Hz, 1H, major), 4.68 (d, *J* = 11.8 Hz, 1H, minor), 4.56 – 4.43 (m, 2H major + 2H minor), 4.40 – 4.29 (m, 1H major + 1H minor), 3.95 – 3.79 (m, 2H major + 2H minor), 3.80 (s, 3H major), 3.77 (s, 3H minor), 3.72 – 3.65 (m, 1H major), 3.63 (s, 3H), 3.58 – 3.53 (m, 1H minor), 3.51 (s, 3H minor); **<sup>13</sup>C NMR** (100 MHz, CDCl<sub>3</sub>): Major isomer: δ = 168.1, 167.8, 158.2, 132.1, 130.1, 129.6, 126.8, 125.6, 122.8, 74.1, 70.5, 53.3, 53.1, 53.1, 51.6, 39.5; Minor isomer: δ = 167.5, 167.2, 159.3, 156.7, 132.1, 130.1, 128.8, 125.2, 122.8, 74.5, 70.4, 53.8, 53.2, 52.7, 50.2, 44.0; **HRMS** (ESI<sup>+</sup>) calculated for C<sub>16</sub>H<sub>17</sub>NO<sub>6</sub>+Na<sup>+</sup> [M+Na]<sup>+</sup>: *m/z* = 342.0948, found 342.0951; **IR**: ν<sub>max</sub> 3075, 2957, 2889, 2360, 1738, 1718, 1635, 1603, 1579, 1488, 1453, 1438, 1431, 1352, 1325, 1312, 1294, 1282, 1267, 1240, 1223, 1199, 1178, 1148, 1008, 890, 875, 788, 774; **HPLC**: IC, Pentane:*i*-PrOH 65:35, F = 1.0 mL/min, λ = 230 nm: Major isomer: t<sub>R</sub> major = 20.0 min, t<sub>R</sub> minor = 54.3 min; Minor isomer: t<sub>R</sub> minor = 16.8 min, t<sub>R</sub> major = 24.6 min.

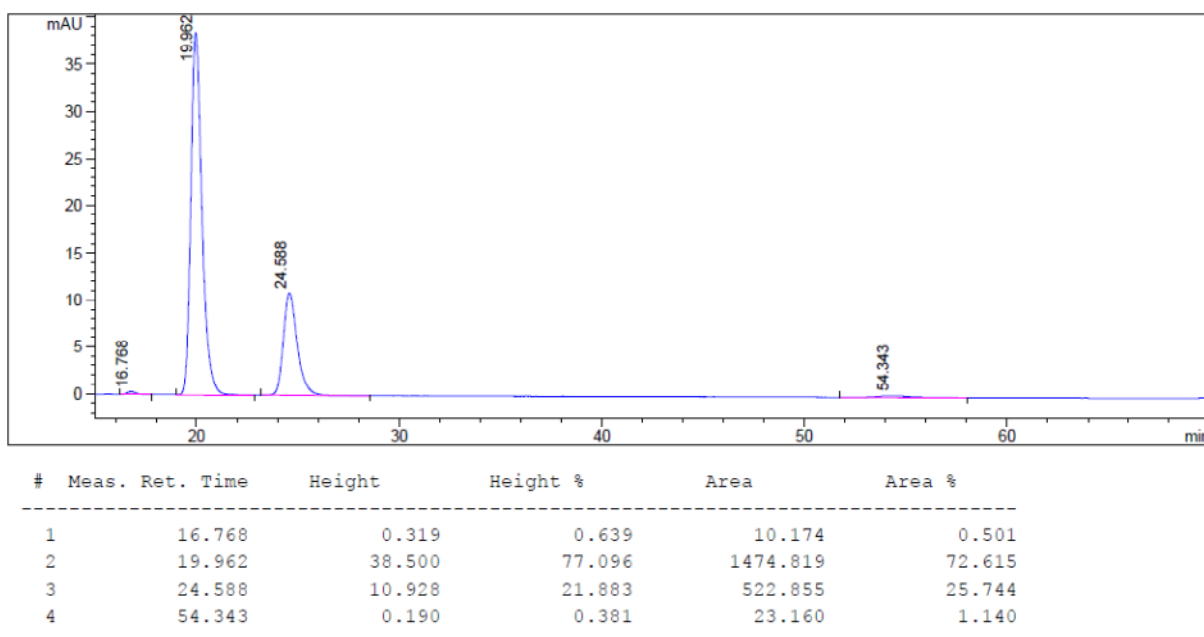

**Diethyl 2-((3a*R*,10*R*)-3a-methyl-3,3a,4,10-tetrahydrobenzo[6,7]oxepino[4,3-*c*]isoxazol-10-yl)malonate (5b)**

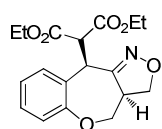

Following the general procedure, the title compound **5b** was obtained after FC (petane-EtOAc 8:1) as a white solid (69%) and a 2.5:1 mixture of diastereoisomers (96% ee each). **<sup>1</sup>H NMR** (400 MHz, CDCl<sub>3</sub>): δ = 7.32 (dd, *J* = 7.6, 1.7 Hz, 1H minor), 7.26 – 7.18 (m, 2H major + 1H minor), 7.13 – 6.96 (m, 2H major + 2H minor), 4.88 (d, *J* = 11.9 Hz, 1H major), 4.66 (d, *J* = 11.8 Hz, 1H minor), 4.55 – 4.40 (m, 2H major + 2H minor), 4.37 – 4.29 (m, 1H major + 1H minor), 4.29 – 4.16 (m, 2H major + 1H minor), 4.08 (q, *J* = 7.1 Hz, 2H major), 4.00 – 3.77 (m, 2H major + 3 H minor), 3.65 (t, *J* = 11.0 Hz, 1H major), 3.53 (t, *J* = 11.6 Hz, 1H minor), 1.27 (td, *J* = 7.1, 6.4 Hz, 3H major + 3H minor), 1.11 (t, *J* = 7.1 Hz, 3H major), 1.02 (t, *J* = 7.1 Hz, 3H minor); **<sup>13</sup>C NMR** (100 MHz, CDCl<sub>3</sub>): Major isomer: δ = 167.6, 167.4, 158.2, 158.1, 130.2, 129.5, 126.8, 125.4, 122.6, 74.1, 70.4, 62.2, 62.0, 53.4, 51.8, 39.3, 14.1, 14.0; Minor isomer: δ = 167.1, 166.7, 159.3, 156.7, 132.1, 129.9, 129.0, 125.1, 122.7, 74.6, 70.3, 62.2, 61.6, 53.9, 50.2, 44.0, 14.1, 13.9; **HRMS** (ESI<sup>+</sup>) calculated for C<sub>18</sub>H<sub>21</sub>NO<sub>6</sub>+Na<sup>+</sup> [M+Na]<sup>+</sup>: *m/z* = 370.1261, found 370.1263; **IR**: ν<sub>max</sub> 3065, 2982, 2895, 1739, 1717, 1602, 1489, 1447, 1374, 1344, 1276, 1267, 1217, 1192, 1145, 1105, 1059, 1040, 1015, 1000, 948, 916, 885, 857, 826, 786, 775, 625; **HPLC**: IC, Pentane:*i*-PrOH 80:20, F = 1.0 mL/min, λ = 230 nm: Major isomer: *t<sub>R</sub>* major = 107.3 min, *t<sub>R</sub>* minor = 39.3 min; Minor isomer: *t<sub>R</sub>* minor = 63.0 min, *t<sub>R</sub>* major = 28.5 min.

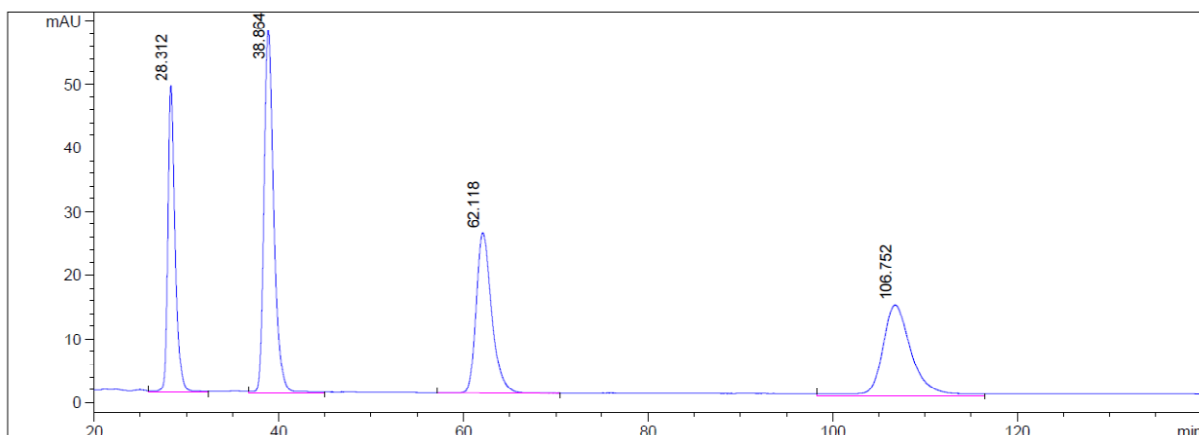

| # | Meas. Ret. Time | Height | Height % | Area     | Area % |
|---|-----------------|--------|----------|----------|--------|
| 1 | 28.312          | 48.170 | 33.308   | 2623.927 | 20.242 |
| 2 | 38.864          | 56.957 | 39.304   | 4213.660 | 32.505 |
| 3 | 62.118          | 25.213 | 17.434   | 2955.840 | 22.802 |
| 4 | 106.752         | 14.281 | 9.875    | 3169.610 | 24.451 |

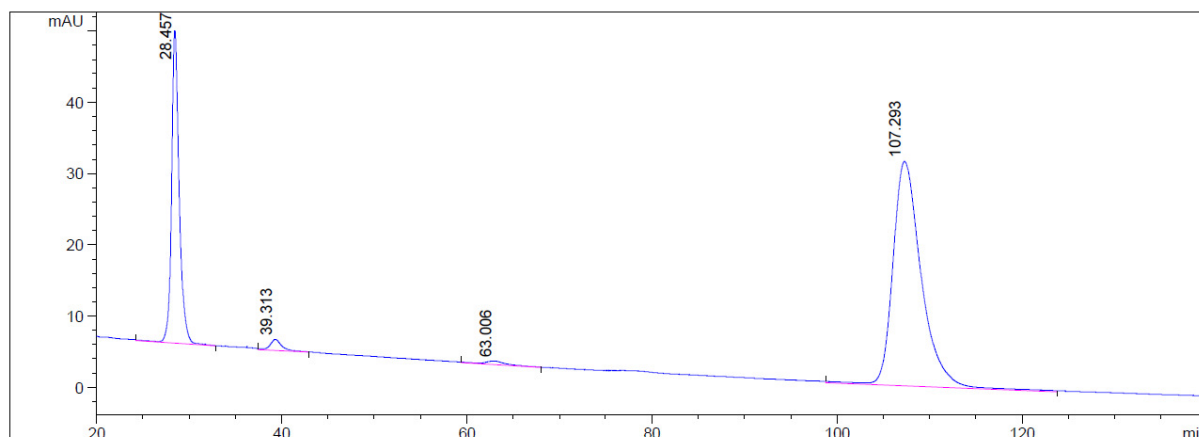

| # | Meas. Ret. Time | Height | Height % | Area     | Area % |
|---|-----------------|--------|----------|----------|--------|
| 1 | 28.457          | 43.908 | 56.707   | 2531.797 | 26.756 |
| 2 | 39.313          | 1.539  | 1.988    | 132.692  | 1.402  |
| 3 | 63.006          | 0.510  | 0.658    | 81.709   | 0.864  |
| 4 | 107.293         | 31.473 | 40.647   | 6716.169 | 70.978 |

### Diisopropyl 2-((3a*R*,10*R*)-3,3a,4,10-tetrahydrobenzo[6,7]oxepino[4,3-*c*]isoxazol-10-yl)malonate (**5c**)

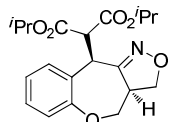

Following the general procedure, the title compound **5c** was obtained after FC (petane-EtOAc 8:1) as a white solid (75%) and a 2.2:1 mixture of diastereoisomers (90% ee each). <sup>1</sup>H NMR (400 MHz, CDCl<sub>3</sub>): δ = 7.33 (dd, *J* = 7.6, 1.7 Hz, 1H minor), 7.25 – 7.17 (m, 2H major + 1H minor), 7.10 – 7.02 (m, 2H major), 7.00 (dd, *J* = 8.0, 1.3 Hz, 1H minor), 5.07 (hept, *J* = 6.3 Hz, 1H major), 5.07 (hept, *J* = 6.3 Hz, 1H minor), 4.94 (hept, *J* = 6.3 Hz, 1H major), 4.87 (d, *J* = 12.0 Hz, 1H major), 4.81 (hept, *J* = 6.3 Hz, 1H minor), 4.64 (d, *J* = 11.9 Hz, 1H minor), 4.52 (ddd, *J* = 11.8, 6.7, 5.1 Hz, 1H major + 1H minor), 4.43 (d, *J* = 12.0 Hz, 1H major), 4.43 (dd, *J* = 10.9, 8.4 Hz, 1H minor), 4.34 (dd, *J* = 10.3, 8.1 Hz, 1H major), 4.27 (d, *J* = 11.9 Hz, 1H minor), 4.21 (tdd, *J* = 11.3, 8.4, 6.4 Hz, 1H minor), 3.96 – 3.85 (m, 1H major + 1H minor), 3.81 (t, *J* = 8.1 Hz, 1H major), 3.61 (t, *J* = 11.2 Hz, 1H major), 3.53 (t, *J* = 11.6 Hz, 1H minor),



1.28 (d,  $J = 6.3$  Hz, 3H major), 1.26 (d,  $J = 3.1$  Hz, 3H minor), 1.24 (d,  $J = 6.1$  Hz, 3H major), 1.24 (d,  $J = 3.1$  Hz, 3H minor), 1.14 (d,  $J = 6.3$  Hz, 3H major), 1.10 (d,  $J = 6.4$  Hz, 3H major) 1.15 – 1.10 (m, 3H minor), 0.93 (d,  $J = 6.3$  Hz, 3H minor);  $^{13}\text{C}$  NMR (100 MHz,  $\text{CDCl}_3$ ): Major isomer:  $\delta = 167.1, 167.0, 158.4, 158.1, 130.3, 129.3, 126.6, 125.3, 122.5, 74.2, 70.2, 69.7, 69.5, 53.5, 52.0, 39.0, 21.7, 21.6, 21.5, 21.4$ ; Minor isomer:  $\delta = 166.7, 166.3, 159.4, 156.8, 132.3, 129.9, 129.1, 125.0, 122.7, 74.6, 70.3, 69.9, 69.2, 54.2, 50.2, 43.8, 21.7$  (2C), 21.5, 21.4; **HRMS** ( $\text{ESI}^+$ ) calculated for  $\text{C}_{20}\text{H}_{25}\text{NO}_6 + \text{Na}^+$   $[\text{M} + \text{Na}]^+$ :  $m/z = 398.1574$ , found 398.1579; **IR**:  $\nu_{\text{max}}$  3065, 2982, 2936, 2881, 2363, 2342, 1744, 1729, 1488, 1466, 1454, 1375, 1297, 1260, 1239, 1219, 1177, 1164, 1097, 1006, 8914, 824, 785, 773; **HPLC**: AS-H, Pentane:*i*-PrOH 95:05,  $F = 1.0$  mL/min,  $\lambda = 230$  nm: Major isomer:  $t_{\text{R}}$  major = 20.2 min,  $t_{\text{R}}$  minor = 14.5 min; Minor isomer:  $t_{\text{R}}$  minor = 26.7 min,  $t_{\text{R}}$  major = 15.7 min.

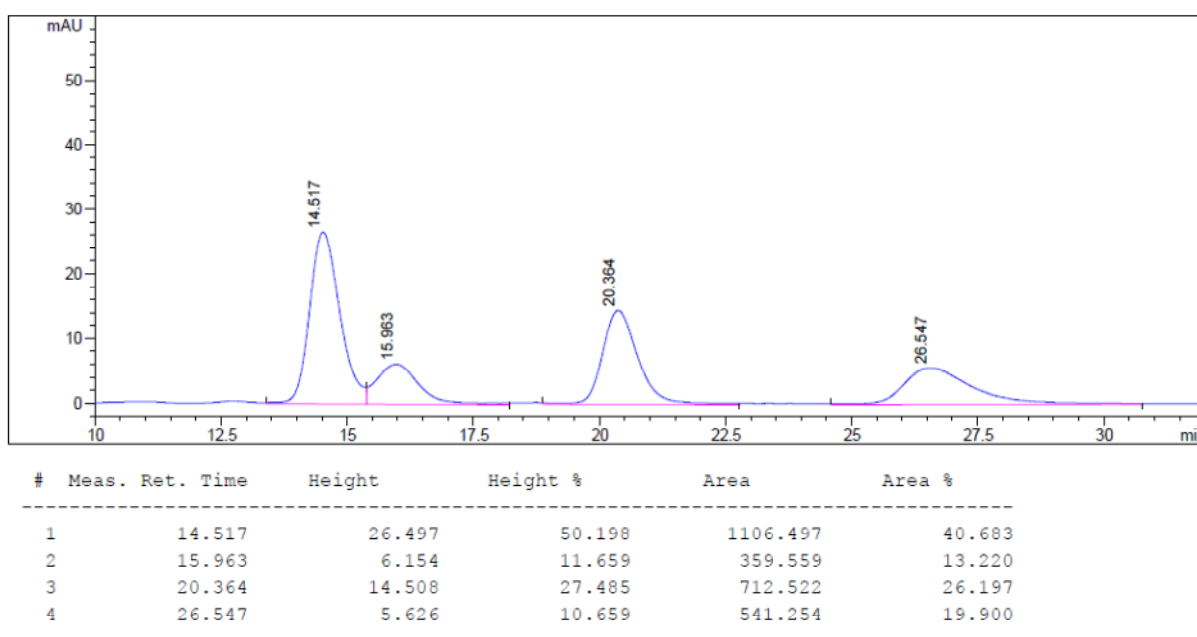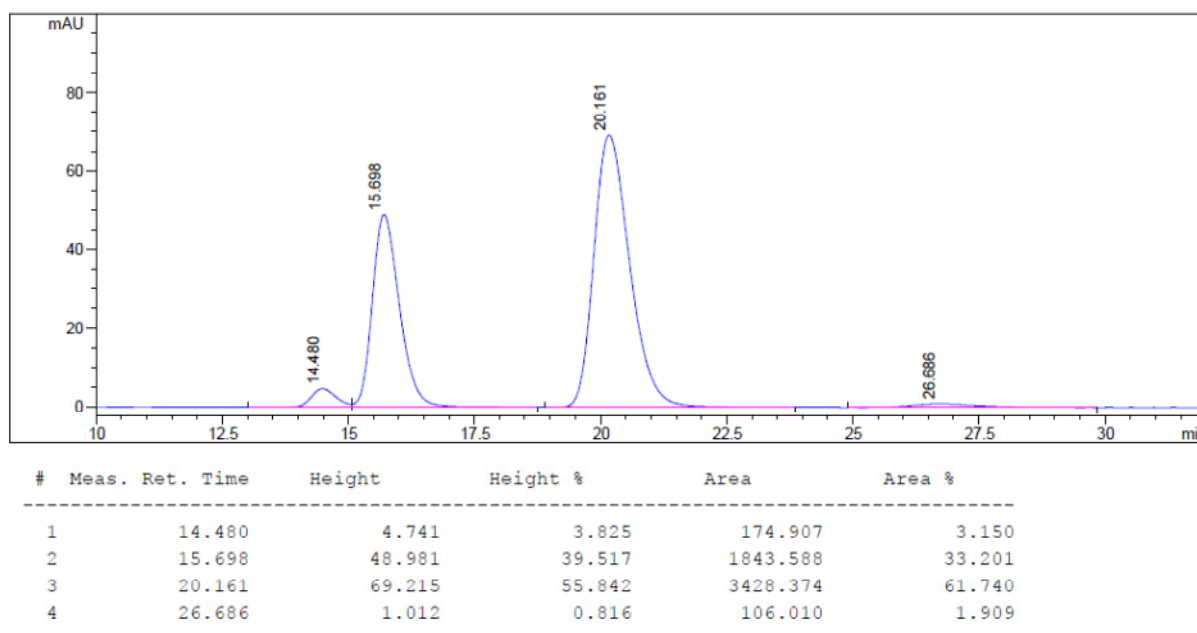

**3-((3*aR*,10*R*)-3,3*a*,4,10-Tetrahydrobenzo[6,7]oxepino[4,3-*c*]isoxazol-10-yl)pentane-2,4-dione (5d)**

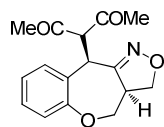

Following the general procedure, the title compound **5d** was obtained after FC (petane-EtOAc 6:1) as a white solid (46%) and a 5.0:1 mixture of diastereoisomers (90% ee each). <sup>1</sup>H NMR (400 MHz, CDCl<sub>3</sub>): δ 7.27 – 7.20 (m, 2H major + 2H minor), 7.11 – 7.05 (m, 1H major + 2H minor), 7.02 (dd, *J* = 7.9, 1.3 Hz, 1H major), 5.00 (d, *J* = 12.1 Hz, 1H minor), 4.93 (d, *J* = 12.1 Hz, 1H minor), 4.76 (d, *J* = 11.9 Hz, 1H major), 4.65 (d, *J* = 11. Hz, 1H major), 4.56 (dd, *J* = 11.3, 7.1 Hz, 1H minor), 4.52 (dd, *J* = 11.5, 6.3 Hz, 1H major), 4.43 (dd, *J* = 11.0, 8.4 Hz, 1H major), 4.36 (dd, *J* = 10.4, 8.2 Hz, 1H minor), 4.02 (tdd, *J* = 11.3, 8.9, 6.3 Hz, 1H major), 3.95 – 3.89 (m, 1H minor), 3.86 (t, *J* = 8.7 Hz, 1H major), 3.80 (t, *J* = 8.4 Hz, 1H minor), 3.58 (t, *J* = 11.3 Hz, 1H minor), 3.54 (t, *J* = 11.6 Hz, 1H major), 2.39 (s, 3H minor), 2.26 (s, 3H major), 2.02 (s, 3H minor), 1.86 (s, 3H major); <sup>13</sup>C NMR (100 MHz, CDCl<sub>3</sub>): Major isomer: δ = 202.5, 202.2, 159.1, 156.5, 132.0, 130.0, 128.6, 125.5, 123.0, 74.5, 70.8, 70.4, 50.0, 44.1, 32.1, 26.8; Minor isomer: δ = 202.4, 202.3, 159.1, 156.5, 132.0, 129.7, 126.7, 125.9, 122.8, 74.4, 70.5, 69.5, 52.1, 39.0, 30.8, 29.8; **HRMS** (ESI<sup>+</sup>) calculated for C<sub>16</sub>H<sub>17</sub>NO<sub>4</sub>+Na<sup>+</sup> [M+Na]<sup>+</sup>: *m/z* = 310.1050, found 310.1058; **IR**: ν<sub>max</sub> 3002, 2969, 2928, 2878, 2361, 2342, 1715, 1691, 1487, 1449, 1411, 1358, 1292, 1268, 1224, 1199, 1187, 1154, 1103, 1011, 922, 866, 843, 774, 621, 612; **HPLC**: OD-H, Pentane:*i*-PrOH 90:10, *F* = 1.0 mL/min, λ = 230 nm: Major isomer: *t<sub>R</sub>* major = 17.8 min, *t<sub>R</sub>* minor = 13.6 min; Minor isomer: *t<sub>R</sub>* minor = 24.8 min, *t<sub>R</sub>* major = 15.5 min.

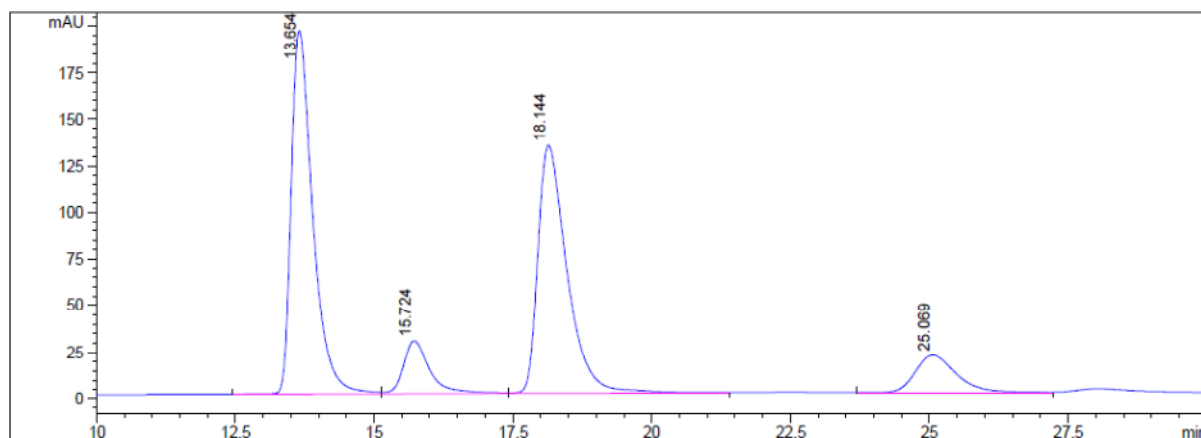

| # | Meas. Ret. Time | Height  | Height % | Area     | Area % |
|---|-----------------|---------|----------|----------|--------|
| 1 | 13.654          | 194.960 | 51.807   | 5268.562 | 43.472 |
| 2 | 15.724          | 28.457  | 7.562    | 944.606  | 7.794  |
| 3 | 18.144          | 132.879 | 35.310   | 4881.713 | 40.280 |
| 4 | 25.069          | 20.022  | 5.321    | 1024.559 | 8.454  |

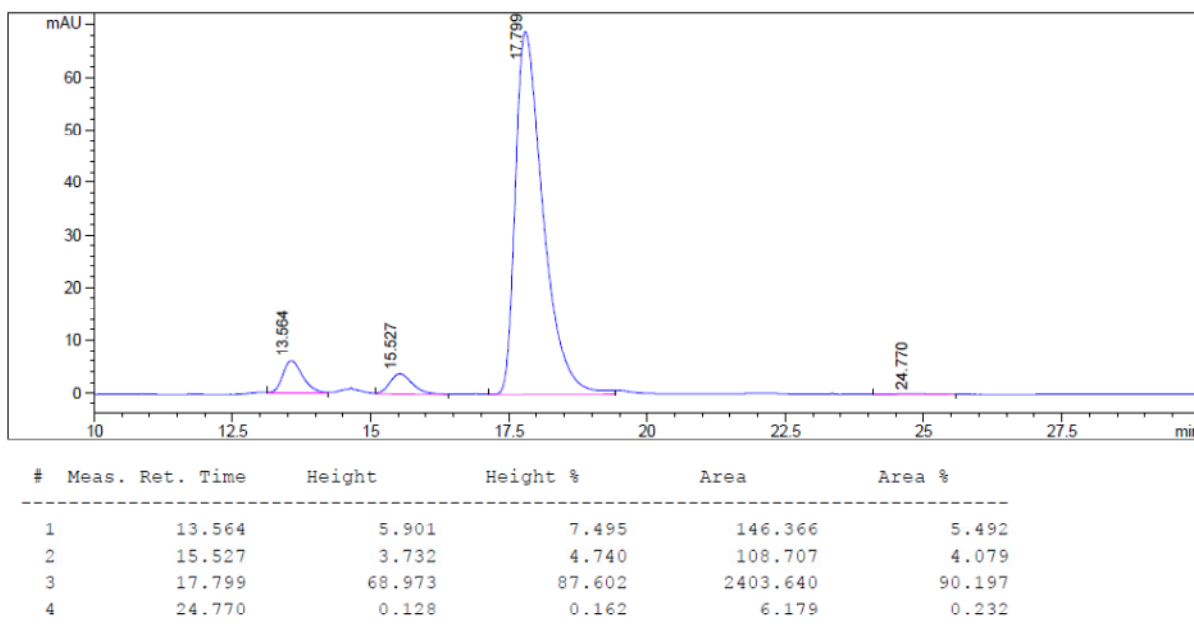

**Dimethyl 2-((3a*R*,10*R*)-8-methyl-3,3a,4,10-tetrahydrobenzo[6,7]oxepino[4,3-*c*]isoxazol-10-yl)malonate (5e)**

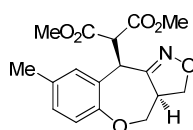

Following the general procedure, the title compound **5e** was obtained after FC (petane-EtOAc 8:1) as a white solid (72%) and a 2.7:1 mixture of diastereoisomers (95% ee each).

**<sup>1</sup>H NMR** (300 MHz, CDCl<sub>3</sub>): δ = 7.13 – 6.85 (m, 3H major + 3H minor), 4.84 (d, *J* = 11.8 Hz, 1H major), 4.60 (d, *J* = 11.8 Hz, 1H minor), 4.55 – 4.24 (m, 3H major + 3 minor), 4.17 (qd, *J* = 11.2, 7.1 Hz, 1H minor), 3.95 – 3.72 (m, 6H major + 2H minor), 3.63 (s, 3H major + 3H minor), 3.51 (s, 3H minor), 2.28 (s, 3H major + 3H minor); **<sup>13</sup>C NMR** (75 MHz, CDCl<sub>3</sub>): Major isomer: δ = 168.1, 167.8, 158.3, 155.8, 135.1, 129.9, 129.6, 127.3, 122.3, 74.1, 70.5, 53.3, 53.1, 53.0, 51.6, 39.4, 21.1; Minor isomer: δ = 167.5, 167.2, 157.1, 156.8, 134.8, 132.3, 130.4, 128.3, 122.4, 74.7, 70.4, 53.8, 53.2, 52.6, 50.2, 44.0, 20.8; **HRMS** (ESI<sup>+</sup>) calculated for C<sub>17</sub>H<sub>19</sub>NO<sub>6</sub>+Na<sup>+</sup> [M+Na]<sup>+</sup>: *m/z* = 356.1105, found 356.1104; **IR**: ν<sub>max</sub> 2978, 2957, 2920, 2904, 2360, 2337, 1746, 1722, 1496, 1452, 1428, 1299, 1261, 1240, 1200, 1156, 1004, 975, 915, 887, 831, 801; **HPLC**: AD-H, Pentane:*i*-PrOH 90:10, F = 1.0 mL/min, λ = 230 nm: Major isomer: *t<sub>R</sub>* major = 26.2 min, *t<sub>R</sub>* minor = 57.0 min; Minor isomer: *t<sub>R</sub>* minor = 21.4 min, *t<sub>R</sub>* major = 23.9 min.

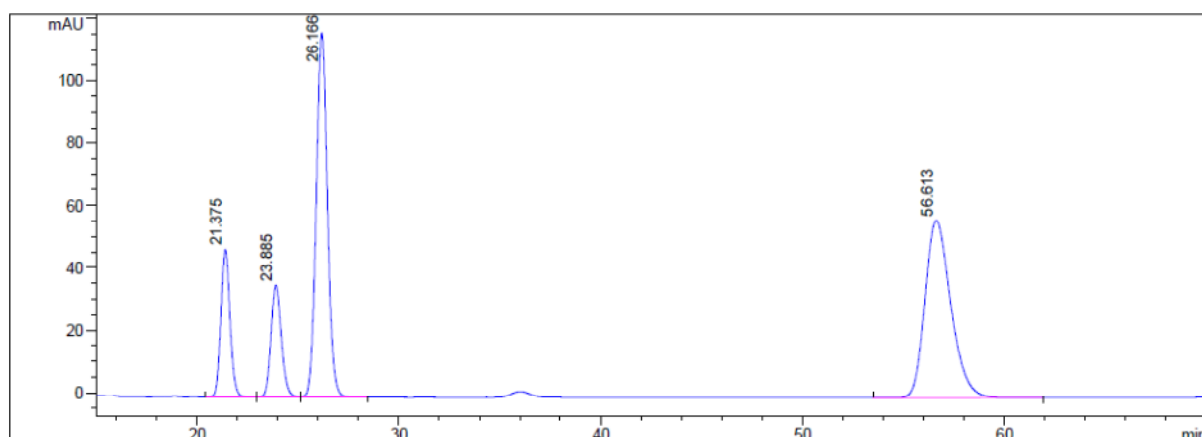

| # | Meas. Ret. Time | Height  | Height % | Area     | Area % |
|---|-----------------|---------|----------|----------|--------|
| 1 | 21.375          | 47.351  | 18.427   | 1476.363 | 11.971 |
| 2 | 23.885          | 35.850  | 13.951   | 1279.091 | 10.372 |
| 3 | 26.166          | 116.841 | 45.469   | 4494.651 | 36.445 |
| 4 | 56.613          | 56.928  | 22.154   | 5082.489 | 41.212 |

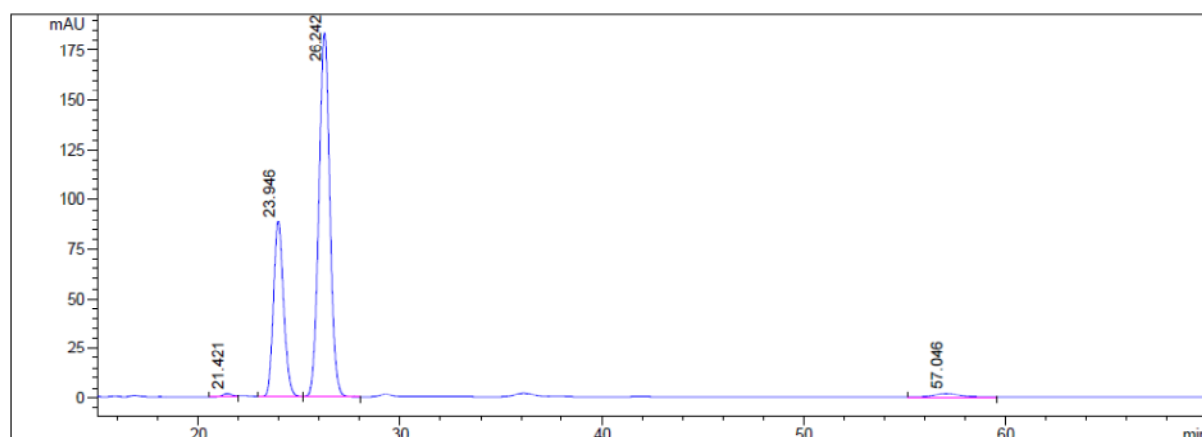

| # | Meas. Ret. Time | Height  | Height % | Area     | Area % |
|---|-----------------|---------|----------|----------|--------|
| 1 | 21.421          | 2.131   | 0.769    | 70.461   | 0.678  |
| 2 | 23.946          | 88.943  | 32.104   | 3142.225 | 30.229 |
| 3 | 26.242          | 183.765 | 66.329   | 6973.131 | 67.083 |
| 4 | 57.046          | 2.212   | 0.798    | 208.962  | 2.010  |

**Dimethyl 2-((3a*R*,10*R*)-8-methoxy-3,3a,4,10-tetrahydrobenzo[6,7]oxepino[4,3-*c*]isoxazol-10-yl)malonate (5f)**

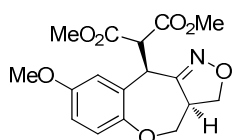

Following the general procedure, the title compound **5f** was obtained after FC (petane-EtOAc 5:1) as a white solid (63%) and a 3:1 mixture of diastereoisomers (95% ee each).

<sup>1</sup>H NMR (300 MHz, CDCl<sub>3</sub>): δ = 7.02 – 6.95 (m, 1H major), 6.92 (d, *J* = 8.7 Hz, 1H minor), 6.83 (d, *J* = 3.0 Hz, 1H minor), 6.76 – 6.69 (m, 2H major + 1H minor), 4.85 (d, *J* = 11.8 Hz, 1H major), 4.60 (d, *J* = 11.8 Hz, 1H minor), 4.54 – 4.28 (m, 3H major + 3H minor), 3.94 – 3.77 (m, 2H major + 2H minor), 3.78 (s, 3H major), 3.76 (s, 3H minor), 3.75 (s, 3H minor), 3.74 (s, 3H major), 3.66 (s, 3H major), 3.60 (t, *J* = 10.9 Hz, 1H major), 3.54 (s, 3H minor), 3.49 (t, *J* = 11.6 Hz, 1H minor); <sup>13</sup>C NMR (75 MHz, CDCl<sub>3</sub>): Major isomer: δ = 168.0, 167.8, 158.1, 156.8, 151.8, 130.8, 123.3, 114.0, 112.1, 74.5, 70.5, 55.7,

53.3, 53.2, 53.0, 51.7, 39.5; Minor isomer:  $\delta$  = 167.4, 167.1, 156.7, 156.4, 152.9, 129.5, 123.5, 116.4, 115.2, 74.9, 70.4, 55.8, 53.7, 53.2, 52.7, 50.1, 44.1; **HRMS** (ESI<sup>+</sup>) calculated for C<sub>17</sub>H<sub>19</sub>NO<sub>7</sub>+Na<sup>+</sup> [M+Na]<sup>+</sup>: m/z = 372.1054, found 372.1061; **IR**:  $\nu_{\max}$  3008, 2956, 2923, 2848, 2361, 1755; 1735, 1610, 1580, 1495, 1433, 1284, 1261, 1238, 1197, 1149, 1034, 1009, 993, 887, 831; **HPLC**: IC, Pentane:*i*-PrOH 65:35, F = 1.0 mL/min,  $\lambda$  = 230 nm: Major isomer:  $t_R$  minor = 23.9 min,  $t_R$  major = 90.9 min; Minor Isomer:  $t_R$  minor = 22.2 min,  $t_R$  major = 28.8 min.

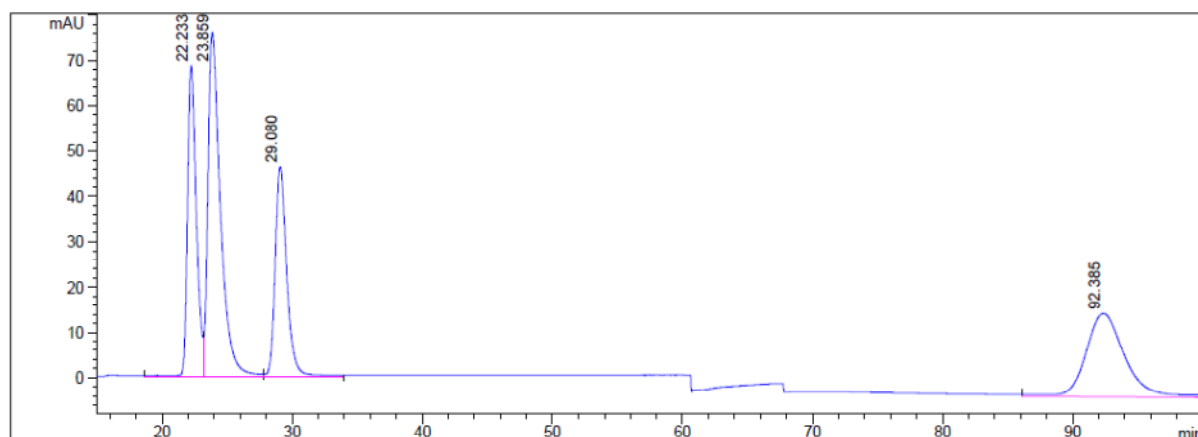

| # | Meas. Ret. Time | Height | Height % | Area     | Area % |
|---|-----------------|--------|----------|----------|--------|
| 1 | 22.233          | 68.535 | 32.747   | 3216.556 | 21.494 |
| 2 | 23.859          | 76.053 | 36.339   | 5055.543 | 33.783 |
| 3 | 29.080          | 46.317 | 22.131   | 2864.073 | 19.139 |
| 4 | 92.385          | 18.382 | 8.783    | 3828.540 | 25.584 |

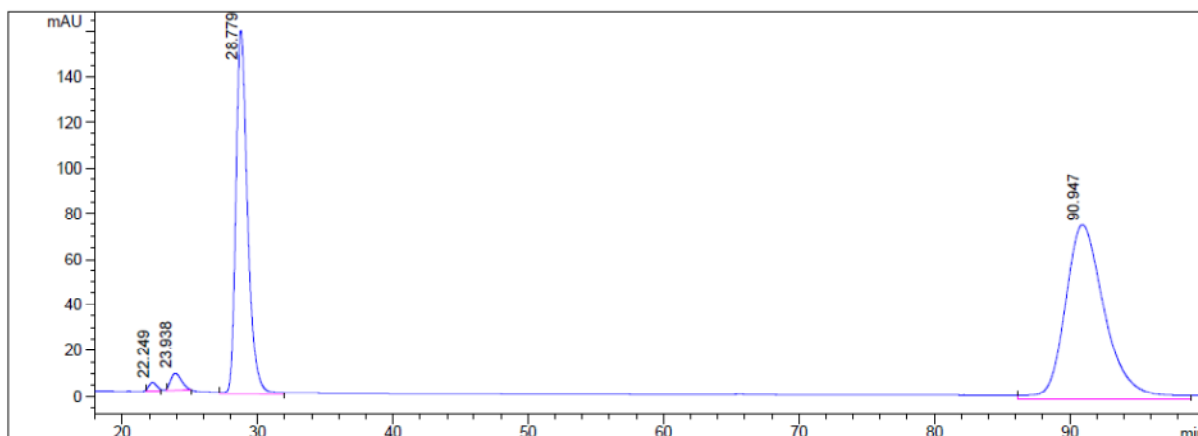

| # | Meas. Ret. Time | Height  | Height % | Area      | Area % |
|---|-----------------|---------|----------|-----------|--------|
| 1 | 22.249          | 3.899   | 1.580    | 166.418   | 0.643  |
| 2 | 23.938          | 7.340   | 2.974    | 410.448   | 1.586  |
| 3 | 28.779          | 159.288 | 64.534   | 9530.808  | 36.827 |
| 4 | 90.947          | 76.303  | 30.913   | 15772.138 | 60.944 |

**Dimethyl 2-((3a*R*,10*R*)-7-methoxy-3,3a,4,10-tetrahydrobenzo[6,7]oxepino[4,3-*c*]isoxazol-10-yl)malonate (5g)**

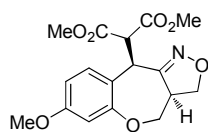

Following the general procedure, the title compound **5g** was obtained after FC (petane-EtOAc 4:1) as a white solid (52%) and a 3:1 mixture of diastereoisomers (95% ee each).

**<sup>1</sup>H NMR** (400 MHz, CDCl<sub>3</sub>): δ 7.20 (d, *J* = 8.5 Hz, 1H), 7.11 – 7.05 (m, 1H major), 6.66 – 6.58 (m, 2H major + 1H minor), 6.55 (d, *J* = 2.6 Hz, 1H minor), 4.77 (d, *J* = 11.6 Hz, 1H major), 4.61 (d, *J* = 11.8 Hz, 1H minor), 4.54 – 4.38 (m, 2H major + 2H minor), 4.35 – 4.25 (m, 1H major + 1H minor), 4.21 – 4.14 (m, 1H minor), 3.91 – 3.65 (m, 10H major + 8H minor), 3.61 (s, 3H major), 3.52 (s, 1H minor); **<sup>13</sup>C NMR** (100 MHz, CDCl<sub>3</sub>): Major isomer : δ = 168.1, 167.8, 160.5, 158.8, 158.4, 127.7, 121.9, 110.6, 108.9, 73.9, 70.5, 55.5, 53.4, 53.2, 53.0, 51.4, 39.1; Minor isomer: δ = 167.5, 167.2, 160.8, 160.2, 156.8, 132.6, 120.6, 110.6, 108.3, 74.6, 70.3, 55.5, 54.0, 53.1, 52.6, 50.2, 43.3; (ESI+) calculated for C<sub>17</sub>H<sub>19</sub>NO<sub>7</sub>+Na<sup>+</sup> [M+Na]<sup>+</sup>: *m/z* = 372.1054, found 372.1047; **IR**: ν<sub>max</sub> 3006, 2978, 2959, 2923, 2837, 2360, 2325, 1744, 1722, 1611, 1574, 1500, 1450, 1438, 1374, 1350, 1311, 1295, 1281, 1259, 1196, 1178, 1149, 1126, 1106, 1085, 1034, 1018, 976, 936, 914, 884, 851, 835, 824, 794; **HPLC**: IC, Pentane:*i*-PrOH 65:35, F = 1.0 mL/min, λ = 230 nm: Major isomer: *t<sub>R</sub>* major = 77.6 min, *t<sub>R</sub>* minor = 30.3 min; Minor isomer: *t<sub>R</sub>* minor = 37.9 min, *t<sub>R</sub>* major = 22.8 min.

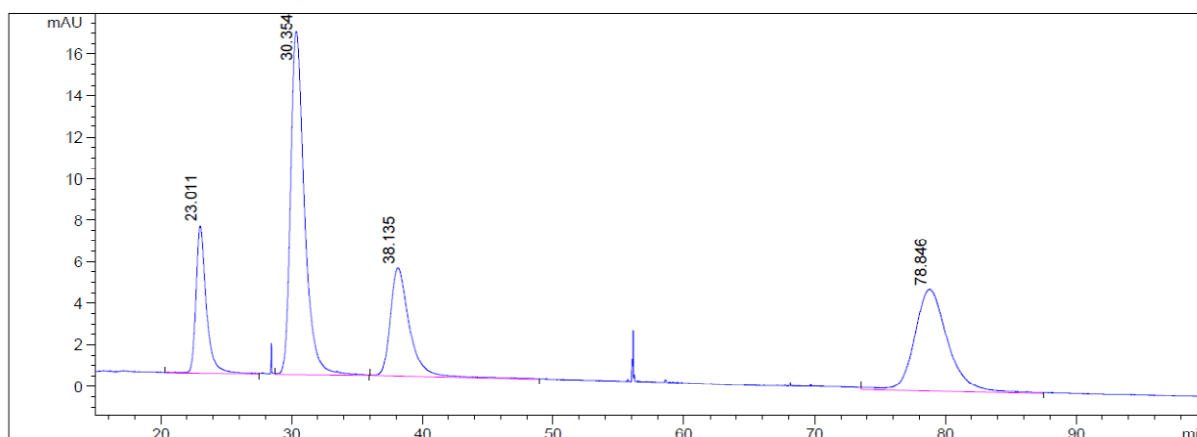

| # | Meas. Ret. Time | Height | Height % | Area     | Area % |
|---|-----------------|--------|----------|----------|--------|
| 1 | 23.011          | 7.098  | 21.058   | 394.240  | 13.080 |
| 2 | 30.354          | 16.526 | 49.030   | 1218.567 | 40.429 |
| 3 | 38.135          | 5.195  | 15.414   | 530.667  | 17.606 |
| 4 | 78.846          | 4.887  | 14.499   | 870.610  | 28.885 |



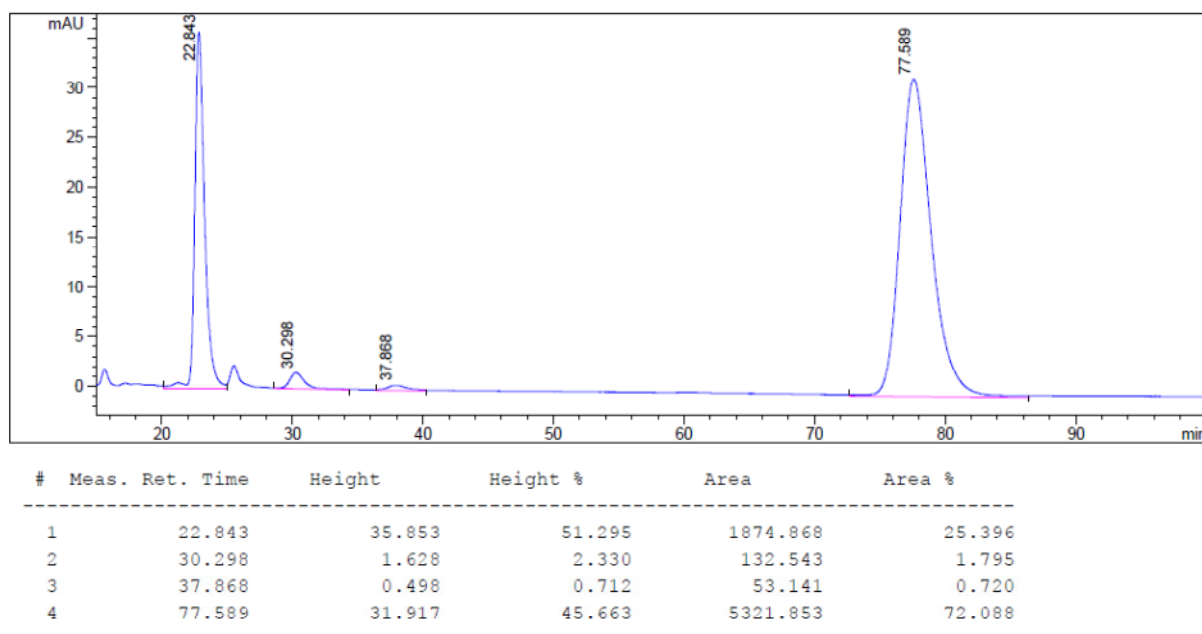

**Dimethyl 2-((3a*R*,10*R*)-6-methoxy-3,3a,4,10-tetrahydrobenzo[6,7]oxepino[4,3-*c*]isoxazol-10-yl)malonate (5h)**

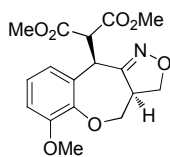

Following the general procedure, the title compound **5h** was obtained after FC (petane-EtOAc 8:1) as a white solid (87%) and a 20:1 mixture of diastereoisomers (95% ee each).

Only signals of the major diastereoisomer: **<sup>1</sup>H NMR** (400 MHz, CDCl<sub>3</sub>): δ = 7.05 (t, *J* = 8.1 Hz, 1H), 6.87 (dd, *J* = 8.4, 1.4 Hz, 1H), 6.76 (ddd, *J* = 7.9, 1.3, 0.6 Hz, 1H), 4.92 (d, *J* = 11.9

Hz, 1H), 4.57 (dd, *J* = 11.0, 7.2 Hz, 1H), 4.51 (d, *J* = 11.9 Hz, 1H), 4.37 – 4.31 (m, 1H), 3.88 – 3.81 (m, 1H), 3.84 (s, 3H), 3.79 (s, 3H), 3.63 (s, 3H); **<sup>13</sup>C NMR** (101 MHz, CDCl<sub>3</sub>): δ = 168.1, 167.8, 158.0, 152.6, 131.6, 125.7, 125.7, 118.0, 112.1, 73.6, 70.5, 56.1, 53.3, 53.1, 53.1, 51.8, 39.4; **HRMS** (ESI<sup>+</sup>) calculated for C<sub>17</sub>H<sub>19</sub>NO<sub>7</sub>+Na<sup>+</sup> [M+Na]<sup>+</sup>: *m/z* = 372.1054, found 372.1056; **IR**: ν<sub>max</sub> 3001, 2955, 2886, 2841, 2360, 2333, 1736, 1599, 1584, 1481, 1456, 1436, 1370, 1275, 1259, 1241, 1199, 1148, 1088, 1059, 1004, 915, 884, 753, 729; **HPLC**: OD-H, Pentane:*i*-PrOH 90:10, F = 1.0 mL/min, λ = 230 nm: Major isomer: *t<sub>R</sub>* major = 45.9 min, *t<sub>R</sub>* minor = 57.5 min; Minor isomer: *t<sub>R</sub>* minor = 23.1min, *t<sub>R</sub>* major = 26.0 min.

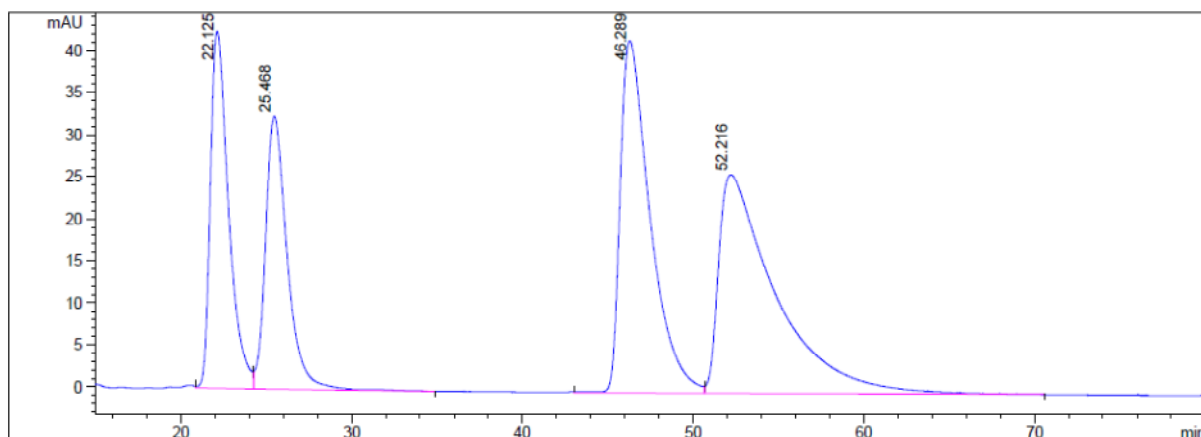

| # | Meas. Ret. Time | Height | Height % | Area     | Area % |
|---|-----------------|--------|----------|----------|--------|
| 1 | 22.125          | 42.467 | 29.758   | 3148.434 | 18.425 |
| 2 | 25.468          | 32.434 | 22.727   | 2864.733 | 16.765 |
| 3 | 46.289          | 41.879 | 29.346   | 5102.828 | 29.863 |
| 4 | 52.216          | 25.928 | 18.169   | 5971.644 | 34.947 |

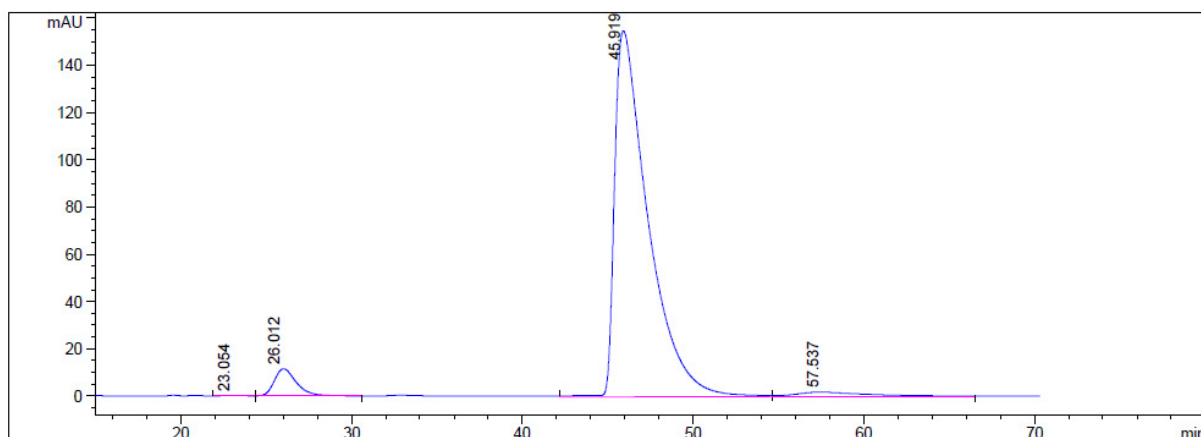

| # | Meas. Ret. Time | Height  | Height % | Area      | Area % |
|---|-----------------|---------|----------|-----------|--------|
| 1 | 23.054          | 0.269   | 0.160    | 22.191    | 0.097  |
| 2 | 26.012          | 11.596  | 6.873    | 1057.268  | 4.637  |
| 3 | 45.919          | 155.007 | 91.870   | 21139.598 | 92.722 |
| 4 | 57.537          | 1.851   | 1.097    | 579.850   | 2.543  |

**Dimethyl 2-((3a*R*,10*R*)-7-(diethylamino)-3,3a,4,10-tetrahydrobenzo[6,7]oxepino[4,3-*c*]isoxazol-10-yl)malonate (5i)**

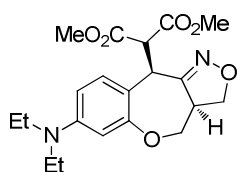

Following the general procedure, the title compound **5i** was obtained after FC (petane-EtOAc 5:1) as a white solid (66%) and a 2.5:1 mixture of diastereoisomers (95% ee each). <sup>1</sup>H NMR (300 MHz, CDCl<sub>3</sub>): δ = 7.09 (d, *J* = 8.5 Hz, 1H minor), 6.97 (d, *J* = 8.4 Hz, 1H major), 6.45 – 6.23 (m, 2H major + minor), 4.73 (d, *J* = 11.8 Hz, 1H major), 4.56 (d, *J* = 11.7 Hz, 1H minor), 4.51 – 4.38 (m, 2H major + 2 H minor), 4.37 – 4.24 (m, 1H major + 1H minor), 3.78 (s, 3H major), 3.74 (s, 1H minor), 3.64 (s, 3H major), 3.55 (s, 3H minor), 3.89 – 3.52 (m, 3H major + 3H minor), 3.30 (q, *J* = 7.1 Hz, 4H major + 4H minor), 1.13 (t, *J* = 7.1 Hz, 6H major + 6H minor); <sup>13</sup>C NMR (75 MHz, CDCl<sub>3</sub>): Major isomer: δ = 168.3, 168.0, 159.1, 159.0, 149.0, 127.5, 115.5, 108.1, 105.4,

74.0, 70.4, 53.5, 53.2, 53.0, 51.7, 44.4 (2C), 38.9, 12.6 (2C); Minor isomer:  $\delta$  = 167.7, 167.4, 160.4, 157.4, 149.3, 132.6, 114.0, 108.0, 105.0, 74.5, 70.2, 54.4, 53.1, 52.6, 50.3, 44.4 (2C), 43.2, 12.6 (2C); **HRMS** (ESI<sup>+</sup>) calculated for C<sub>20</sub>H<sub>26</sub>N<sub>2</sub>O<sub>6</sub>+Na<sup>+</sup> [M+Na]<sup>+</sup>:  $m/z$  = 413.1683, found 413.1681; **IR**:  $\nu_{\max}$  2969, 2933, 2882, 1756, 1736, 1614, 1557, 1512, 1434, 1398, 1376, 1297, 1272, 1257, 1238, 1216, 1193, 1146, 1108, 1080, 1021, 916, 882, 729; **HPLC**: IA, Pentane:*i*-PrOH 90:10, F = 1.0 mL/min,  $\lambda$  = 230 nm: Major isomer:  $t_R$  minor = 26.3 min,  $t_R$  major = 31.8 min; Minor isomer:  $t_R$  major = 17.9 min,  $t_R$  minor = 22.4 min.

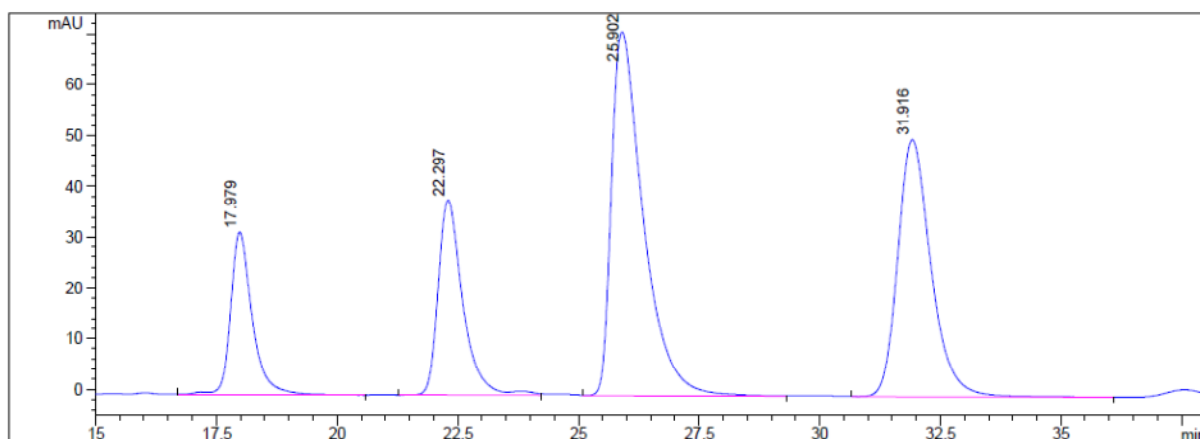

| # | Meas. Ret. Time | Height | Height % | Area     | Area % |
|---|-----------------|--------|----------|----------|--------|
| 1 | 17.979          | 32.074 | 16.656   | 1005.206 | 12.424 |
| 2 | 22.297          | 38.321 | 19.900   | 1362.953 | 16.846 |
| 3 | 25.902          | 71.618 | 37.190   | 3287.861 | 40.637 |
| 4 | 31.916          | 50.558 | 26.254   | 2434.723 | 30.093 |

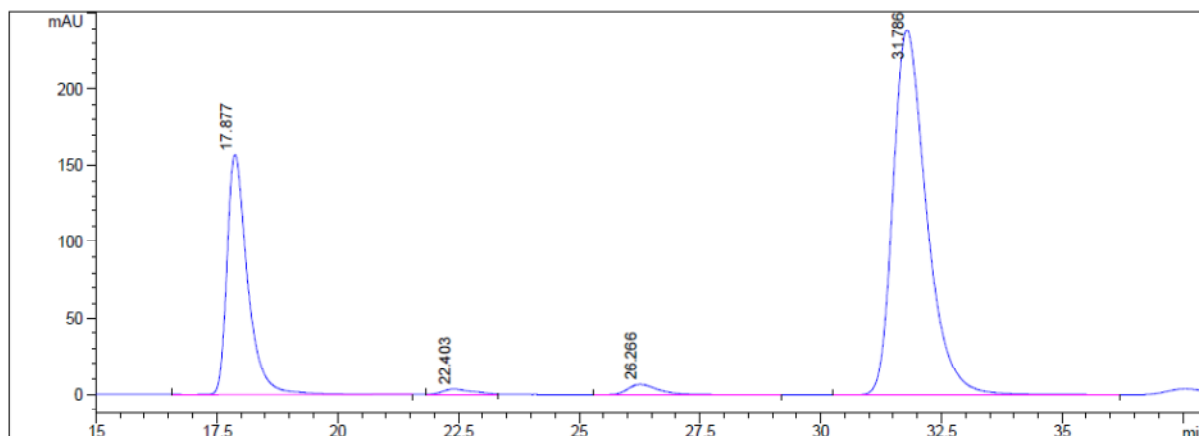

| # | Meas. Ret. Time | Height  | Height % | Area      | Area % |
|---|-----------------|---------|----------|-----------|--------|
| 1 | 17.877          | 157.791 | 38.721   | 4692.175  | 28.028 |
| 2 | 22.403          | 3.458   | 0.849    | 143.628   | 0.858  |
| 3 | 26.266          | 6.840   | 1.678    | 321.446   | 1.920  |
| 4 | 31.786          | 239.418 | 58.752   | 11584.077 | 69.195 |

**Dimethyl 2-((8a*R*,12*R*)-8,8a,9,12-tetrahydronaphtho[1',2':6,7]oxepino[4,3-*c*]isoxazol-12-yl)malonate (**5j**)**

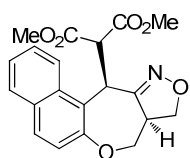

Following the general procedure, the title compound **5j** was obtained after FC (pentane-EtOAc 5:1) as a white solid (63%) and a 3.8:1 mixture of diastereoisomers (81% ee each).

**<sup>1</sup>H NMR** (300 MHz, CDCl<sub>3</sub>): δ = 8.36 (d, *J* = 8.7 Hz, 1H minor), 8.28 (d, *J* = 8.7 Hz, 2H major), 7.90 – 7.72 (m, 2H major + 2H minor), 7.66 – 7.53 (m, 1H major + 1H minor), 7.53

– 7.39 (m, 1H major + 1H minor), 7.26 (d, *J* = 8.7 Hz, 1H major), 7.20 (d, *J* = 8.8 Hz, 1H minor), 5.65 (d, *J* = 11.8 Hz, 1H minor), 5.63 (d, *J* = 9.8 Hz, 1H major), 4.76 (d, *J* = 11.7 Hz, 1H minor), 4.64 (dd, *J* = 11.3, 6.7 Hz, 1H minor), 4.54 (d, *J* = 9.8 Hz, 1H major), 4.49 (dd, *J* = 11.0, 8.3 Hz, 1H minor), 4.36 – 4.15 (m, 3H major + 1H minor), 4.08 (dd, *J* = 8.5, 6.3 Hz, 1H major), 3.86 (s, 3H major), 3.83 (s, 3H minor), 3.89 – 3.76 (m, 1H major) 3.66 – 3.55 (m, 2H minor), 3.45 – 3.29 (m, 1H major), 3.20 (s, 3H minor), 3.09 (s, 3H major);

**<sup>13</sup>C NMR** (75 MHz, CDCl<sub>3</sub>): Major isomer: δ = 168.4, 167.2, 159.7, 153.4, 131.9, 131.7, 131.1, 128.6, 127.0, 125.3, 125.0, 123.9, 122.1, 71.9, 71.3, 55.6, 53.1, 52.2, 48.5, 35.6; Minor isomer: δ = 167.7, 167.0, 157.9, 156.4, 131.8, 131.6, 130.9, 130.8, 128.5, 125.0, 124.3, 123.6, 122.3, 74.8, 70.3, 53.3, 53.2, 52.4, 49.9, 36.7;

**HRMS** (ESI<sup>+</sup>) calculated for C<sub>20</sub>H<sub>19</sub>NO<sub>6</sub>+Na<sup>+</sup> [*M*+Na]<sup>+</sup>: *m/z* = 392.1105, found 392.1109; **IR**: ν<sub>max</sub> 3059, 2953, 2884, 2361, 1735, 1622, 1594, 1512, 1434, 1376, 1332, 1297, 1242, 1219, 1150, 1079, 1008, 913, 885, 859, 830, 753, 730; **HPLC**: IC, Pentane:*i*-PrOH 75:25, *F* = 1.2 mL/min, λ = 230 nm: Major isomer: *t<sub>R</sub>* minor = 31.6 min, *t<sub>R</sub>* major = 194.6 min; Minor isomer: *t<sub>R</sub>* minor = 17.4 min, *t<sub>R</sub>* major = 27.5 min.

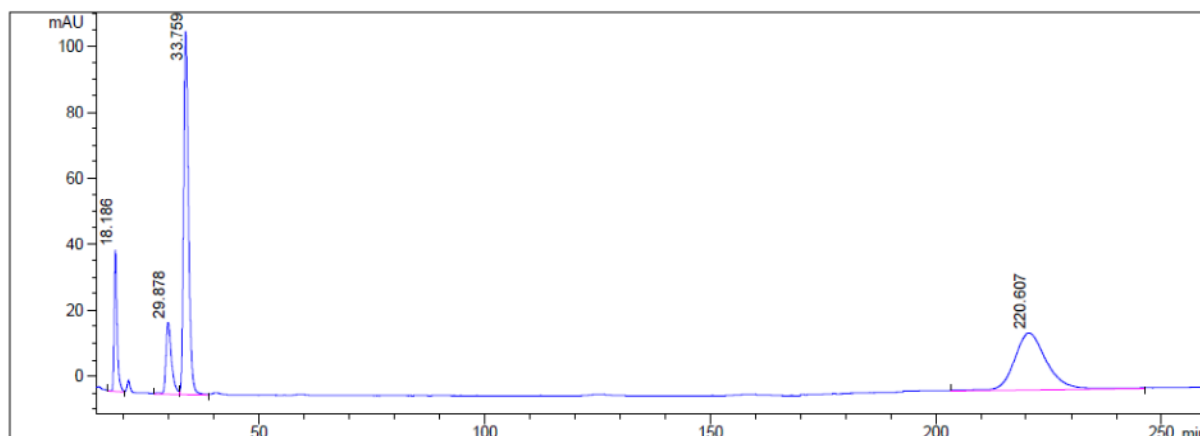

| # | Meas. Ret. Time | Height  | Height % | Area     | Area % |
|---|-----------------|---------|----------|----------|--------|
| 1 | 18.186          | 42.744  | 22.319   | 1937.726 | 9.349  |
| 2 | 29.878          | 21.545  | 11.250   | 1838.441 | 8.870  |
| 3 | 33.759          | 110.052 | 57.464   | 8273.394 | 39.916 |
| 4 | 220.607         | 17.175  | 8.968    | 8677.504 | 41.866 |

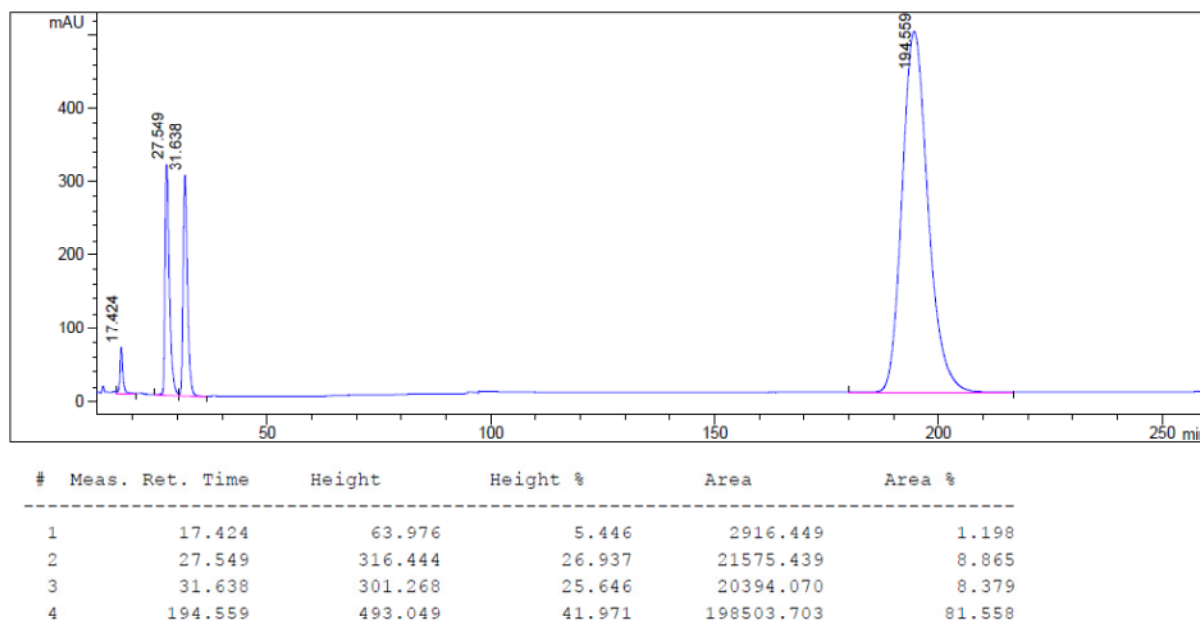

**Dimethyl 2-((3a*R*,10*R*)-8-fluoro-3,3a,4,10-tetrahydrobenzo[6,7]oxepino[4,3-*c*]isoxazol-10-yl)malonate (**5k**)**

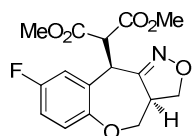

Following the general procedure, the title compound **5k** was obtained after FC (petane-EtOAc 5:1) as a white solid (57%) and a 2.8:1 mixture of diastereoisomers (96% ee each).

**<sup>1</sup>H NMR** (300 MHz, CDCl<sub>3</sub>):  $\delta$  = 7.10 – 6.86 (m, 3H major + 3H minor), 4.87 (d,  $J$  = 11.7 Hz, 1H major), 4.62 (d,  $J$  = 11.8 Hz, 1H minor), 4.56 – 4.41 (m, 2H major + 2H minor), 4.41 – 4.30 (m, 1H major+ 1H minor), 3.96 – 3.80 (m, 2H major + 2H minor), 3.79 (s, 3H major), 3.77 (s, 3H minor), 3.69 (s, 3H major), 3.66 – 3.47 (m, 1H major + 1 H minor); 3.57 (s, 3H minor); **<sup>13</sup>C NMR** (75 MHz, CDCl<sub>3</sub>): Major isomer:  $\delta$  = 167.8, 167.6, 159.7 (d,  $^1J$  = 244.5 Hz), 157.6, 154.2 (d,  $^4J$  = 2.9 Hz), 132.0 (d,  $^3J$  = 7.9 Hz), 124.0 (d,  $^3J$  = 8.7 Hz), 115.8 (d,  $^2J$  = 22.7 Hz), 113.7 (d,  $^3J$  = 25.0 Hz), 74.4 (d,  $^6J$  = 1.5 Hz), 70.6, 53.4, 53.3, 52.8, 51.6, 39.3 (d,  $^4J$  = 1.3 Hz); Minor Isomer:  $\delta$  = 167.2, 167.0, 159.1 (d,  $^1J$  = 244.6 Hz), 156.2; 155.3 (d,  $^4J$  = 2.8 Hz), 130.6 (d,  $^3J$  = 8.0 Hz), 124.2 (d,  $^3J$  = 8.5 Hz), 118.5 (d,  $^2J$  = 24.0 Hz), 116.5 (d,  $^2J$  = 22.8 Hz), 74.8 (d,  $^6J$  = 0.9 Hz), 70.5, 53.6, 53.3, 52.8, 50.1, 43.7 (d,  $^4J$  = 1.4 Hz); **HRMS** (ESI<sup>+</sup>) calculated for C<sub>16</sub>H<sub>16</sub>FNO<sub>6</sub>+Na<sup>+</sup> [M+Na]<sup>+</sup>:  $m/z$  = 360.0854, found 360.0844; **<sup>19</sup>F NMR** (282 MHz, CDCl<sub>3</sub>):  $\delta$  = -115.99 (major), -117.14 (minor); **IR**:  $\nu_{\max}$  3078, 3007, 2958, 2923, 2852, 1754, 1736, 1590, 1489, 1430, 1383, 1350, 1305, 1262, 1239, 1184, 1145, 1014, 1005, 978, 962, 918, 887, 870, 842, 823; **HPLC**: IC, Pentane:*i*-PrOH 80:20, F = 1.0 mL/min,  $\lambda$  = 210 nm: Major isomer:  $t_R$  minor = 27.4 min,  $t_R$  major = 63.4 min; Minor isomer:  $t_R$  major = 19.5 min,  $t_R$  minor = 35.5 min.

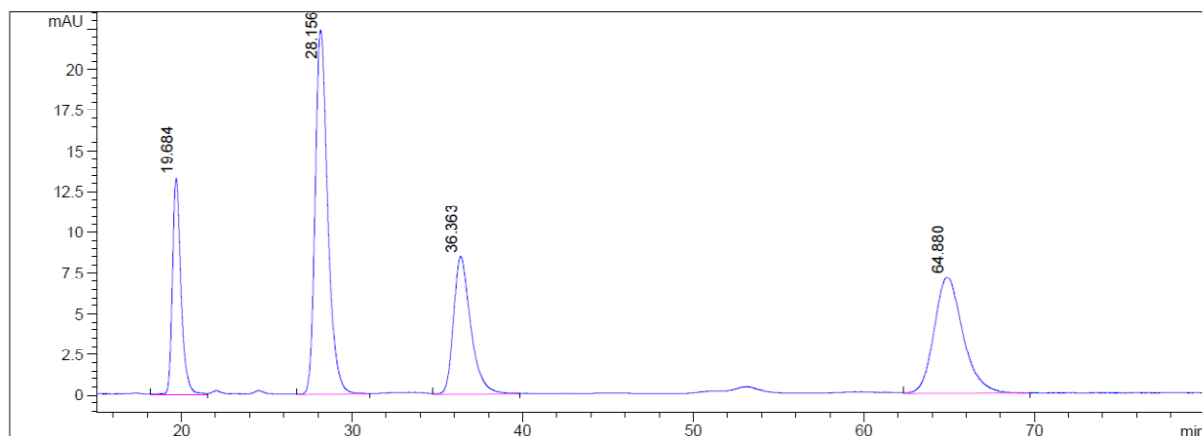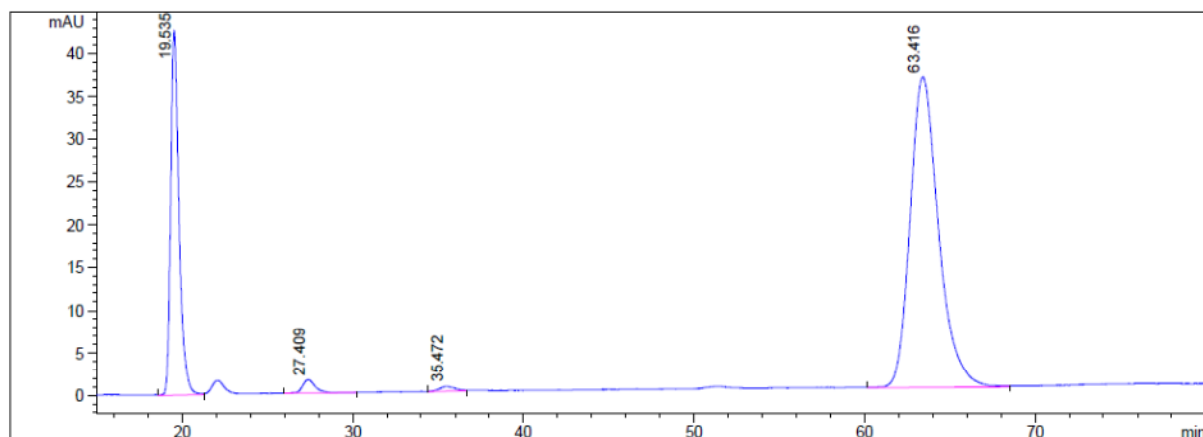

**Dimethyl 2-((3a*R*,10*R*)-8-bromo-3,3a,4,10-tetrahydrobenzo[6,7]oxepino[4,3-*c*]isoxazol-10-yl)malonate (**5I**)**

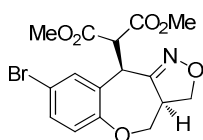

Following the general procedure, the title compound **5I** was obtained after FC (petane-EtOAc 5:1) as a white solid (50%) and a 3.6:1 mixture of diastereoisomers (92% ee each).

**<sup>1</sup>H NMR** (300 MHz, CDCl<sub>3</sub>): δ = 7.47 (d, *J* = 2.4 Hz, 1H, minor), 7.40 – 7.31 (m, 2H, major + 2H, minor), 6.96 (d, *J* = 8.4 Hz, 1H, major), 6.90 (d, *J* = 8.5 Hz, 1H, minor), 4.84 (d, *J* = 11.6 Hz, 1H, major), 4.61 (d, *J* = 11.7 Hz, 1H, minor), 4.56 – 4.15 (m, 4H, major + 1 H, minor), 3.96 – 3.81 (m, 2H, major + 2 H minor), 3.79 (s, 3H, major), 3.77 (s, 1H, minor), 3.70 (s, 3H, major), 3.65 (t, *J* = 9.0 Hz, 1H, major), 3.57 (s, 1H, minor), 3.56 – 3.43 (m, 2H, minor). **<sup>13</sup>C NMR** (150 MHz, CDCl<sub>3</sub>): Major isomer: δ = 167.8, 167.6, 157.5, 157.2, 132.5, 132.4, 130.1, 124.5, 118.2, 74.1, 70.6, 53.3, 53.2, 52.9, 51.4, 39.4; Minor isomer: δ = 167.2, 166.9, 158.4, 156.1, 134.6, 132.9, 131.0, 124.7, 117.7, 74.6, 70.4, 53.7, 53.3, 52.8,



50.0, 43.6; **HRMS** (ESI<sup>+</sup>) calculated for C<sub>16</sub>H<sub>16</sub>BrNO<sub>6</sub>+Na<sup>+</sup> [M+Na]<sup>+</sup>: m/z = 420.0053, found 420.0056; **IR**: ν<sub>max</sub> 2915, 2872, 1682, 1591, 1475, 1412, 1392, 1271, 1236, 1222, 1180, 1124, 1098, 1013, 993, 936, 901, 885, 876, 852, 810; **HPLC**: IA, Pentane:*i*-PrOH 90:10, F = 1.0 mL/min, λ = 230 nm: Major isomer: t<sub>R</sub> major = 22.0 min, t<sub>R</sub> minor = 55.6 min; Minor isomer: t<sub>R</sub> minor = 19.6 min, t<sub>R</sub> major = 24.1 min.

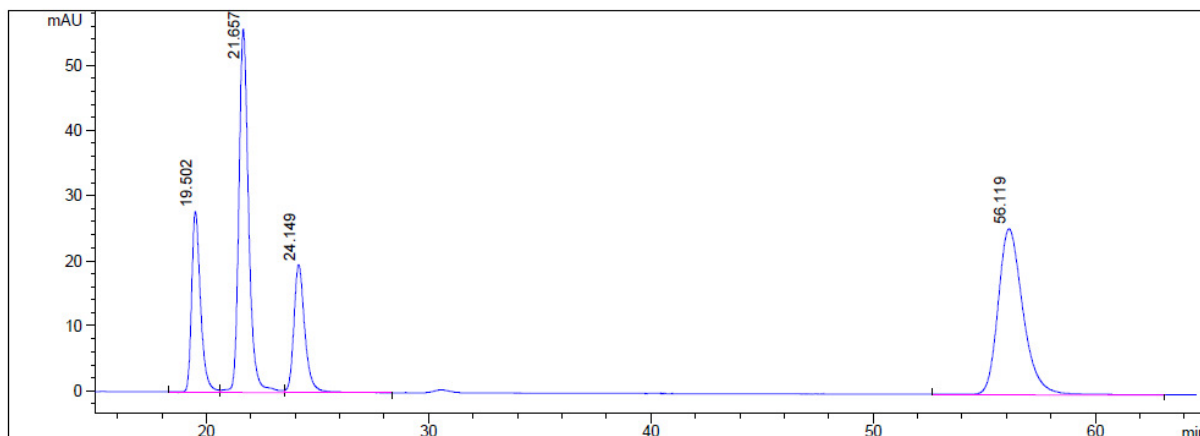

| # | Meas. Ret. Time | Height | Height % | Area     | Area % |
|---|-----------------|--------|----------|----------|--------|
| 1 | 19.502          | 27.810 | 21.588   | 777.864  | 15.027 |
| 2 | 21.657          | 55.843 | 43.348   | 1709.710 | 33.028 |
| 3 | 24.149          | 19.679 | 15.276   | 686.547  | 13.263 |
| 4 | 56.119          | 25.492 | 19.788   | 2002.349 | 38.682 |

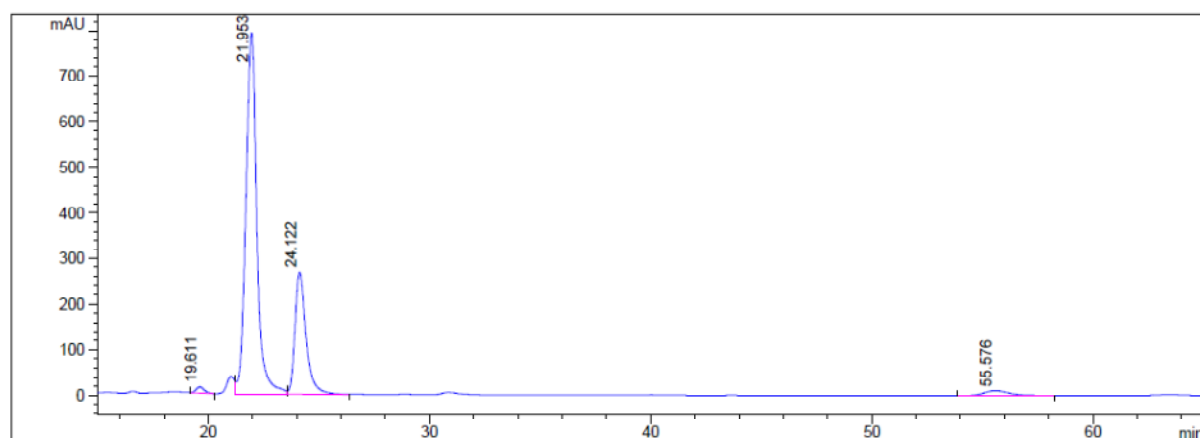

| # | Meas. Ret. Time | Height  | Height % | Area      | Area % |
|---|-----------------|---------|----------|-----------|--------|
| 1 | 19.611          | 14.304  | 1.314    | 379.654   | 0.989  |
| 2 | 21.953          | 794.109 | 72.950   | 27484.262 | 71.571 |
| 3 | 24.122          | 268.077 | 24.627   | 9395.403  | 24.466 |
| 4 | 55.576          | 12.074  | 1.109    | 1141.859  | 2.973  |

**Dimethyl 2-((3a*R*,10*R*)-7,9-dichloro-3,3a,4,10-tetrahydrobenzo[6,7]oxepino[4,3-*c*]isoxazol-10-yl)malonate (**5m**)**

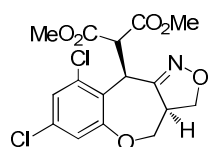

Following the general procedure, the title compound **5m** was obtained after FC (petane-EtOAc 6:1) as a white solid (58%) and a 2.9:1 mixture of diastereoisomers (80% ee each): <sup>1</sup>H NMR (300 MHz, CDCl<sub>3</sub>): δ = 7.28 (d, *J* = 2.1 Hz, 1H, major), 7.25 (d, *J* = 2.2 Hz, 1H, minor), 7.04 (d, *J* = 2.1 Hz, 1H, major), 6.99 (d, *J* = 2.1 Hz, 1H, minor), 5.37 (d, *J* = 11.7 Hz, 1H, minor),

5.31 (d,  $J = 9.9$  Hz, 1H, major), 4.58 (dd,  $J = 11.5$ , 6.6 Hz, 1H, minor), 4.47 (dd,  $J = 11.1$ , 8.6 Hz, 2H, minor), 4.35 – 4.21 (m, 2H, major), 4.21 (d,  $J = 9.0$  Hz, 2H, major), 4.04 (dd,  $J = 8.6$ , 6.8 Hz, 1H, major), 3.90 (t,  $J = 8.5$  Hz, 1H, minor), 3.81 (s, 3H, major), 3.78 (s, 1H, minor), 3.59 (s, 1H, minor), 3.54 (s, 3H, major), 3.50 – 3.29 (m, 1H, major + 1H, minor);  $^{13}\text{C NMR}$  (100 MHz,  $\text{CDCl}_3$ ): Major isomer:  $\delta = 167.7$ , 167.0, 157.6, 156.8, 135.8, 135.3, 128.7, 126.9, 122.6, 72.6, 71.2, 54.9, 53.2, 52.8, 48.2, 37.5; Minor isomer:  $\delta = 166.3$ , 163.8, 156.4, 155.1, 137.0, 135.0, 129.4, 126.5, 122.2, 71.4, 71.3, 53.5, 53.3, 52.7, 48.5, 40.5.

The major diastereomer could be isolated:  $^1\text{H NMR}$  (400 MHz,  $\text{CDCl}_3$ ):  $\delta = 7.28$  (d,  $J = 2.1$  Hz, 1H), 7.03 (dd,  $J = 2.1$ , 0.5 Hz, 1H), 5.30 (d,  $J = 9.7$  Hz, 0H), 4.31 (d,  $J = 9.8$  Hz, 1H), 4.27 (dd,  $J = 9.8$ , 8.6 Hz, 1H), 4.21 (d,  $J = 1.1$  Hz, 1H), 4.19 (d,  $J = 2.6$  Hz, 1H), 4.03 (dd,  $J = 8.6$ , 6.8 Hz, 1H), 3.80 (s, 3H), 3.54 (s, 3H), 3.46 – 3.32 (m, 1H);  $^{13}\text{C NMR}$  (100 MHz,  $\text{CDCl}_3$ ):  $\delta = 167.7$ , 167.0, 157.6, 156.8, 135.8, 135.3, 128.6, 126.9, 122.6, 72.6, 71.2, 54.9, 53.2, 52.8, 48.2, 37.5; **HRMS** ( $\text{ESI}^+$ ) calculated for  $\text{C}_{16}\text{H}_{15}\text{Cl}_2\text{NO}_6 + \text{Na}^+ [\text{M} + \text{Na}]^+$ :  $m/z = 410.0169$  found 410.0166; **IR**:  $\nu_{\text{max}}$  3081, 2954, 2888, 1736, 1586, 1558, 1435, 1406, 1370, 1334, 1297, 1258, 1238, 1194, 1151, 1089, 1011, 914, 882, 842, 803, 731, 650; **HPLC**: IA, Pentane:*i*-PrOH 90:10,  $F = 1.0$  mL/min,  $\lambda = 230$  nm: Major isomer:  $t_{\text{R}}$  major = 17.6 min,  $t_{\text{R}}$  minor = 24.1 min; Minor isomer:  $t_{\text{R}}$  minor = 13.1 min,  $t_{\text{R}}$  major = 14.5 min.

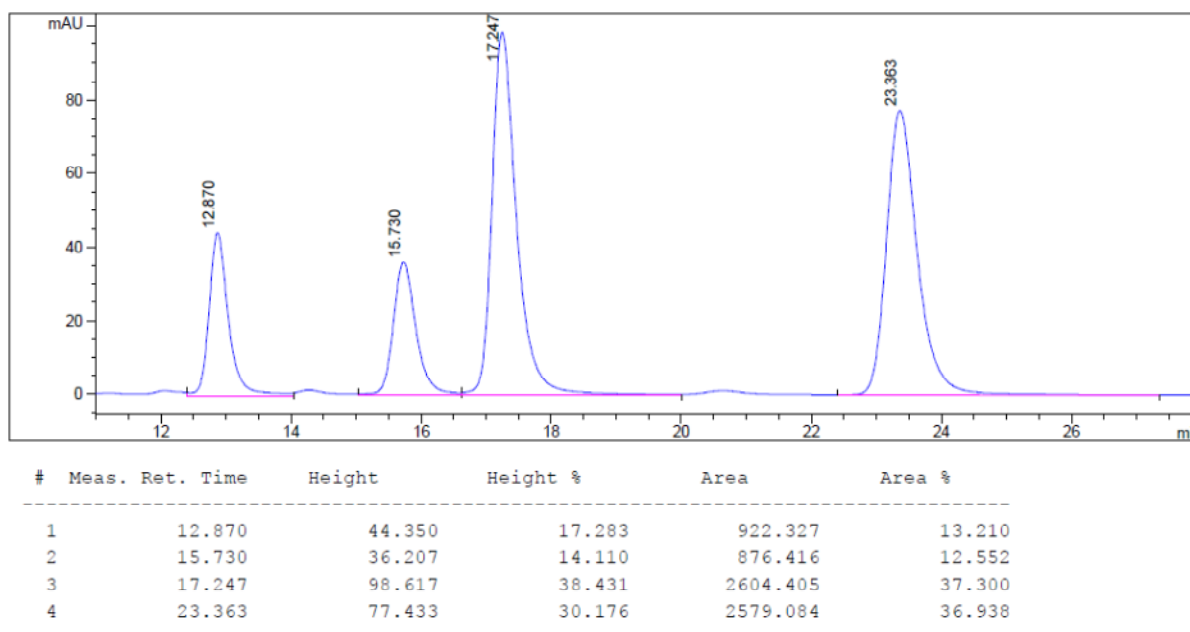

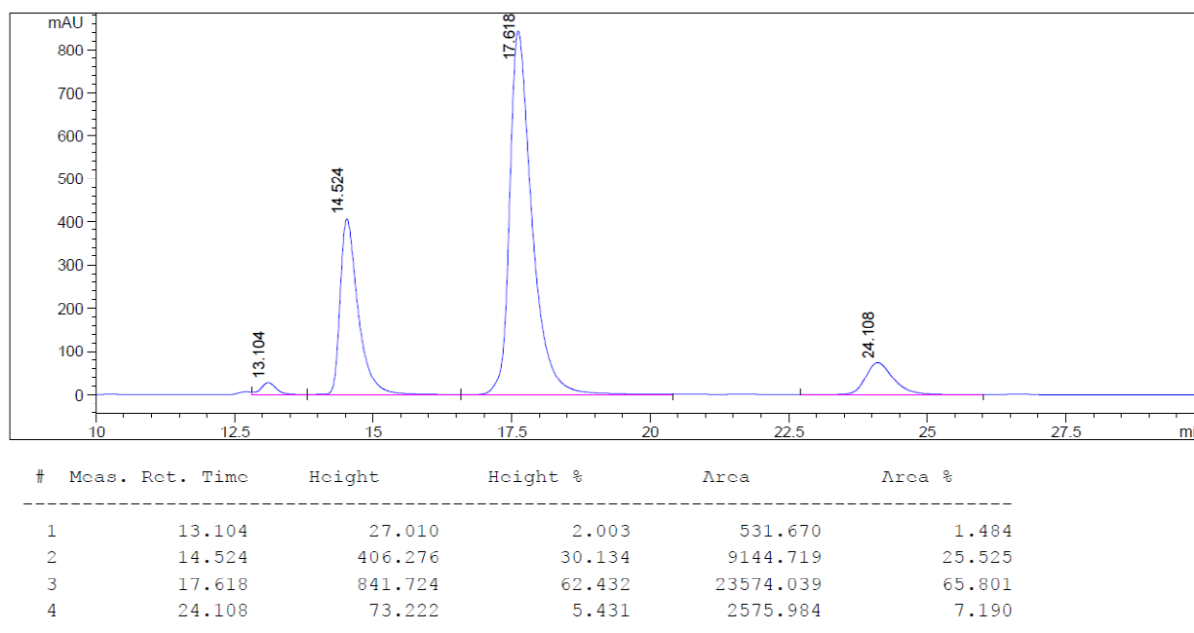

**Dimethyl 2-((3*aS*,10*R*)-5-benzoyl-3*a*,4,5,10-tetrahydro-3*H*-benzo[*b*]isoxazolo[3,4-*e*]azepin-10-yl)malonate (**5n**)**

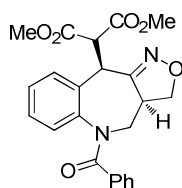

Following the general procedure, the title compound **5n** was obtained after FC (petane-EtOAc 4:1→2:1) as a white solid (60%) and a 3.6:1 mixture of diastereoisomers (95% ee each). <sup>1</sup>H NMR (300 MHz, CDCl<sub>3</sub>): δ = 7.51 (d, *J* = 7.8 Hz, 2H, minor), 7.45 – 7.38 (m, 2H, major), 7.36 – 7.11 (m, 6H, major, + 6 H, minor), 7.13 – 6.97 (m, 1H, major, + 1H, minor), 6.75 (d, *J* = 7.7 Hz, 1H, major), 6.66 (d, *J* = 7.8 Hz, 1H, minor), 5.36 (dd, *J* = 13.1, 6.5 Hz, 1H, major), 5.34 – 5.23 (m, 1H, minor), 5.05 (d, *J* = 12.6 Hz, 1H, major), 4.88 (d, *J* = 12.4 Hz, 1H, minor), 4.74 (d, *J* = 12.6 Hz, 1H, major), 4.52 (dd, *J* = 10.7, 8.2 Hz, 1H, major), 4.34 (d, *J* = 12.5 Hz, 1H, minor), 4.10 – 3.97 (m, 3H, minor), 3.92 – 3.84 (m, 1H, major), 3.82 (s, 3H, major), 3.76 (s, 3H, minor), 3.76 (s, 3H, major), 3.68 (s, 3H, minor), 2.82 (t, *J* = 12.3 Hz, 1H, minor), 2.71 (dd, *J* = 13.0, 11.6 Hz, 1H, major); <sup>13</sup>C NMR (100 MHz, CDCl<sub>3</sub>): Major isomer: δ = 169.7 (2C), 167.7, 167.7, 157.3, 143.9, 134.8, 133.8, 130.4, 129.4, 129.3, 128.9, 128.7, 128.5, 128.0, 125.1, 71.6, 53.6, 53.4, 52.1, 50.8, 49.9, 39.8; Minor isomer: δ = 166.9, 166.8, 158.4, 156.9, 143.1, 134.1, 131.7, 130.7, 130.0, 129.3, 128.9, 128.8, 128.6, 128.1, 128.1, 127.8, 72.2, 60.5, 53.9, 53.4, 52.9, 50.5, 48.6; HRMS (ESI<sup>+</sup>) calculated for C<sub>23</sub>H<sub>22</sub>NO<sub>6</sub>+Na<sup>+</sup> [M+Na]<sup>+</sup>: *m/z* = 445.1370, found 445.1369; IR: ν<sub>max</sub> 1745, 1725, 1649, 1602, 1579, 1490, 1449, 1435, 1395, 1345, 1320, 1294, 1275, 1264, 1199, 1151, 970, 926, 894, 875, 789, 777, 728, 708; HPLC: IC, Pentane:*i*-PrOH 80:20, F = 1.0 mL/min, λ = 230 nm: Major isomer: *t*<sub>R</sub> minor = 51.9 min, *t*<sub>R</sub> major = 184.4min; Minor isomer: *t*<sub>R</sub> minor = 79.5 min, *t*<sub>R</sub> major = 91.8 min.

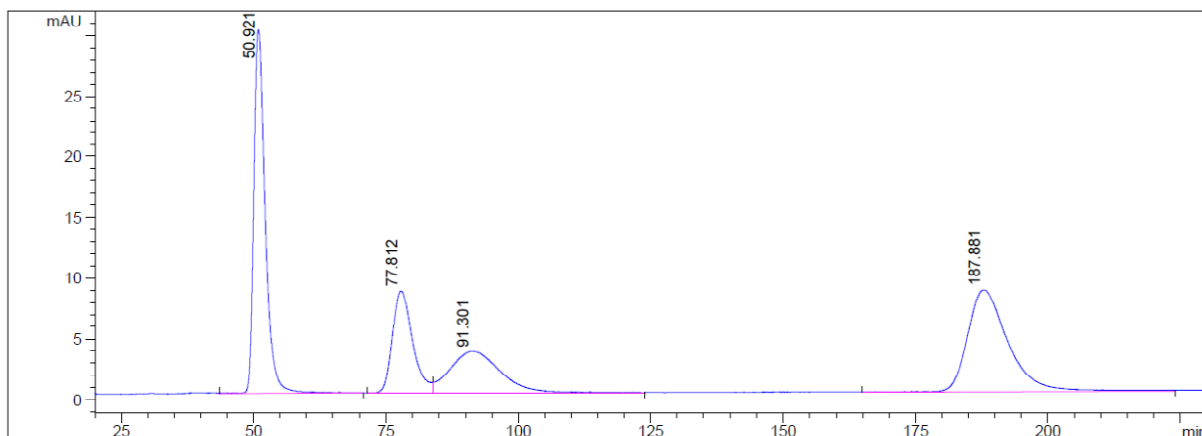

| # | Meas. Ret. Time | Height | Height % | Area     | Area % |
|---|-----------------|--------|----------|----------|--------|
| 1 | 50.921          | 29.969 | 59.735   | 4485.035 | 33.094 |
| 2 | 77.812          | 8.404  | 16.752   | 2242.413 | 16.546 |
| 3 | 91.301          | 3.433  | 6.842    | 2336.524 | 17.241 |
| 4 | 187.881         | 8.364  | 16.671   | 4488.320 | 33.119 |

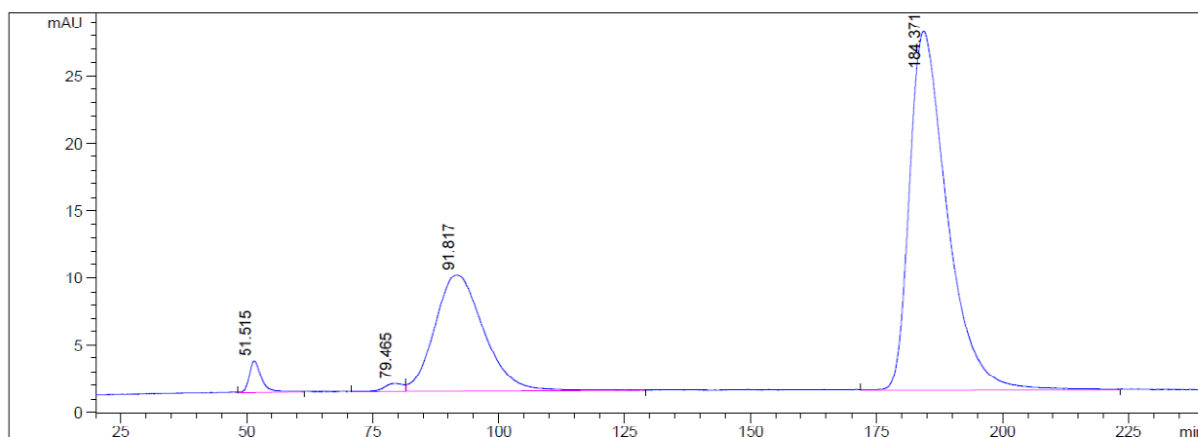

| # | Meas. Ret. Time | Height | Height % | Area      | Area % |
|---|-----------------|--------|----------|-----------|--------|
| 1 | 51.515          | 2.323  | 6.069    | 386.970   | 1.905  |
| 2 | 79.465          | 0.587  | 1.533    | 155.437   | 0.765  |
| 3 | 91.817          | 8.708  | 22.750   | 5862.489  | 28.853 |
| 4 | 184.371         | 26.659 | 69.648   | 13913.712 | 68.478 |

**Dimethyl 2-((3a*S*,10*R*)-5-(4-toluensulfonyl)-3a,4,5,10-tetrahydro-3*H*-benzo[*b*]isoxazolo[3,4-*e*]azepin-10-yl)malonate (**5o**)**

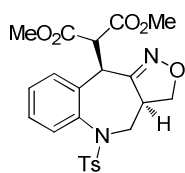

Following the general procedure, the title compound **5o** was obtained after FC (petane-EtOAc 2:1) as a white solid (57%) and a 2.3:1 mixture of diastereoisomers (97% ee each). <sup>1</sup>H NMR (300 MHz, CDCl<sub>3</sub>): δ = 7.84 (d, *J* = 8.3 Hz, 2H minor), 7.78 (d, 8.3 Hz, 2H major), 7.50 (dd, *J* = 7.6, 1.8 Hz, 1H minor), 7.44 – 7.10 (m, 6H major + 4H minor), 6.88 (dd, *J* = 7.8, 1.5 Hz, 1H minor), 4.83 – 4.53 (m, 3H major + 2H minor), 4.51 – 4.22 (m, 2H major + 1H minor), 4.01 – 3.83 (m, 1H major + 2H minor), 3.79 (d, *J* = 3.2 Hz, 1H minor), 3.77 (s, 3H minor), 3.74 (s, 3H major), 3.67 (s, 3H major), 3.61 (s, 3H minor), 3.04 – 2.83 (m, 1H major + 1H minor), 2.48 (s, 3H minor), 2.44 (s, 3H major); <sup>13</sup>C NMR (75 MHz, CDCl<sub>3</sub>): Major isomer: δ = 167.6, 167.4, 157.6, 144.1, 140.1, 138.3, 136.0, 133.8,

130.2, 129.9, 129.6, 129.4, 128.7, 127.3, 125.1, 71.3, 53.3, 52.8, 52.2, 51.8, 50.5, 39.1, 21.8; Minor isomer:  $\delta$  = 167.6, 167.3, 157.1, 144.4, 140.3, 138.5, 136.0, 134.7, 130.3, 129.9, 129.5, 129.4, 128.6, 127.4, 127.2, 71.7, 53.5, 53.2, 44.6, 21.8; **HRMS** (ESI<sup>+</sup>) calculated for C<sub>23</sub>H<sub>24</sub>N<sub>2</sub>O<sub>7</sub>S+Na<sup>+</sup> [M+Na]<sup>+</sup>: m/z = 495.1196, found 495.1190; **IR**:  $\nu_{\max}$  3291; 2954, 2924, 2850, 2361, 2343, 2257, 1755, 1732, 1599, 1553, 1493, 1452, 1435, 1344, 1304, 1241, 1157, 1089, 1018, 912, 880; **HPLC**: IC, Pentane:*i*-PrOH 80:20, F = 1.0 mL/min,  $\lambda$  = 230 nm: Major isomer:  $t_R$  minor = 72.5 min,  $t_R$  major = 317.2 min; Minor isomer:  $t_R$  major = 94.6 min,  $t_R$  minor = 167.0 min.

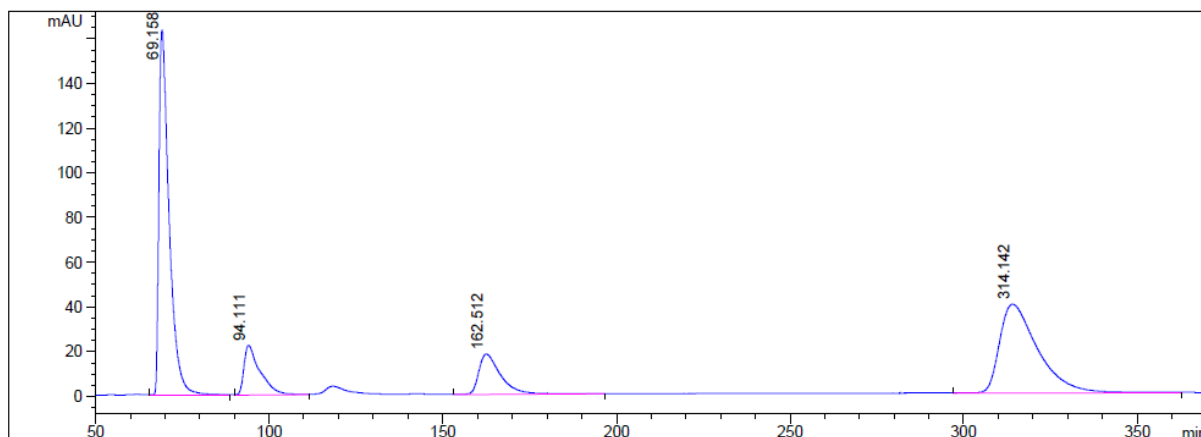

| # | Meas. Ret. Time | Height  | Height % | Area      | Area % |
|---|-----------------|---------|----------|-----------|--------|
| 1 | 69.158          | 163.469 | 67.133   | 33431.914 | 42.198 |
| 2 | 94.111          | 22.210  | 9.121    | 7234.951  | 9.132  |
| 3 | 162.512         | 17.993  | 7.389    | 7972.649  | 10.063 |
| 4 | 314.142         | 39.828  | 16.356   | 30586.051 | 38.606 |

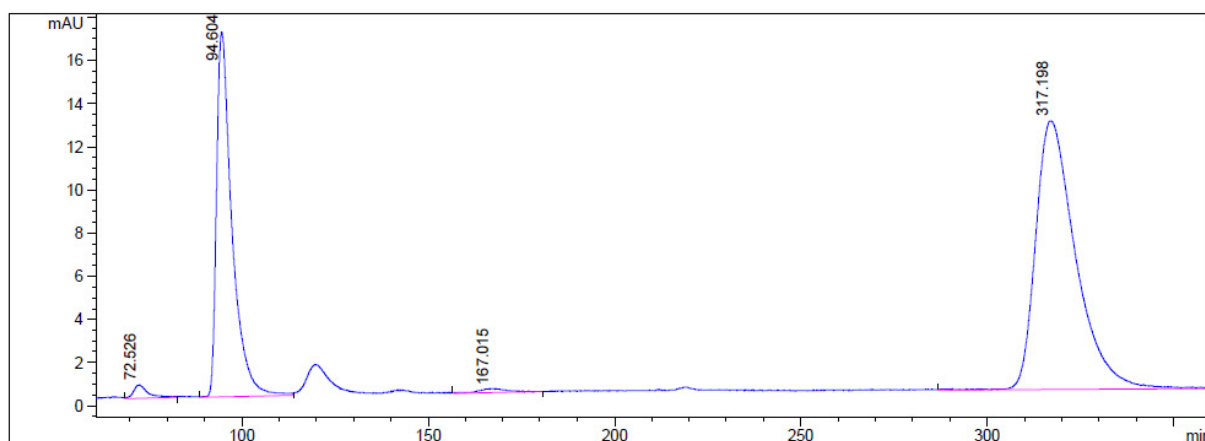

| # | Meas. Ret. Time | Height | Height % | Area     | Area % |
|---|-----------------|--------|----------|----------|--------|
| 1 | 72.526          | 0.616  | 2.041    | 164.617  | 1.139  |
| 2 | 94.604          | 16.912 | 56.063   | 4883.356 | 33.799 |
| 3 | 167.015         | 0.191  | 0.633    | 96.068   | 0.665  |
| 4 | 317.198         | 12.447 | 41.263   | 9304.162 | 64.397 |

**(R)-Dimethyl 2-(4,10-dihydrobenzo[6,7]oxepino[4,3-c]isoxazol-10-yl)malonate (5p)**

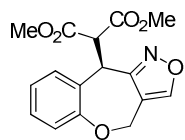

Following the general procedure, the title compound **5p** was obtained after FC (petane-EtOAc 4:1) as a white solid (99%, 96% ee).  $[\alpha]_D^{20} = +119$  (*c* 2.27, CHCl<sub>3</sub>); <sup>1</sup>H NMR (400 MHz, CDCl<sub>3</sub>): δ = 8.11 (d, *J* = 1.1 Hz, 1H), 7.39 (dd, *J* = 7.1, 1.5 Hz, 1H), 7.30 (ddd, *J* = 8.1, 7.3, 1.7 Hz, 1H), 7.12 (td, *J* = 7.8, 7.4, 1.1 Hz, 2H), 5.40 (dd, *J* = 14.6, 1.2 Hz, 1H), 4.93 (dd, *J* = 11.2, 0.8 Hz, 1H), 4.81 (dd, *J* = 14.6, 1.4 Hz, 1H), 4.53 (d, *J* = 11.2 Hz, 1H), 3.67 (s, 3H), 3.54 (s, 3H); <sup>13</sup>C NMR (100 MHz, CDCl<sub>3</sub>): δ = 167.5, 167.4, 158.9, 157.4, 153.3, 132.0, 131.3, 130.3, 125.5, 123.0, 116.1, 65.9, 56.2, 52.9, 52.6, 41.3; HRMS (ESI<sup>+</sup>) calculated for C<sub>16</sub>H<sub>15</sub>NO<sub>6</sub>+Na<sup>+</sup> [M+Na]<sup>+</sup>: *m/z* = 340.0792, found 340.0788; IR: ν<sub>max</sub> 3118, 3005, 2955, 2873, 1734, 1601, 1582, 1488, 1457, 1434, 1419, 1261, 1238, 1148, 1106, 1013, 894, 782; HPLC: OJ-H, Pentane:*i*-PrOH 85:15, F = 1.0 mL/min, λ = 230 nm, *t*<sub>R</sub> major (*R*) = 25.2 min, *t*<sub>R</sub> minor (*S*) = 32.8 min.

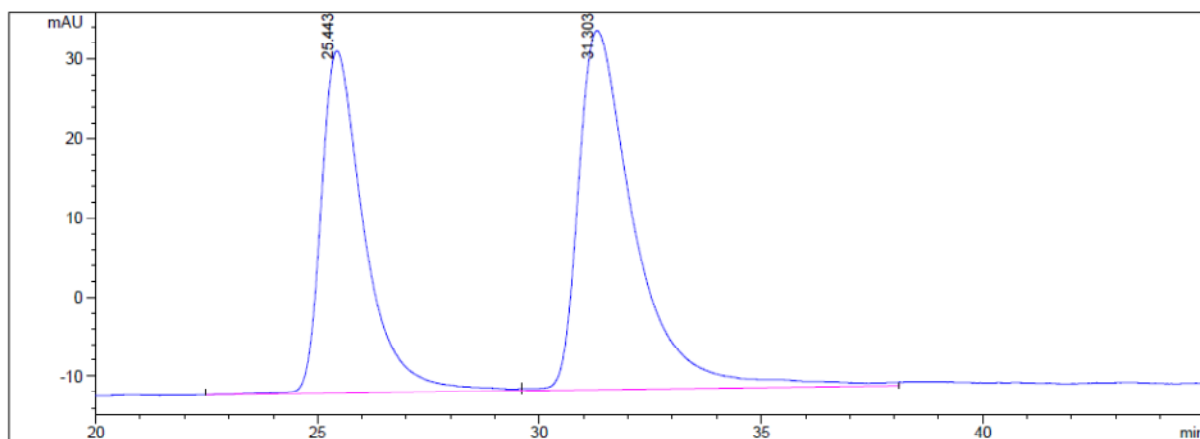

| # | Meas. Ret. Time | Height | Height % | Area     | Area % |
|---|-----------------|--------|----------|----------|--------|
| 1 | 25.443          | 43.143 | 48.776   | 2928.793 | 42.181 |
| 2 | 31.303          | 45.308 | 51.224   | 4014.544 | 57.819 |

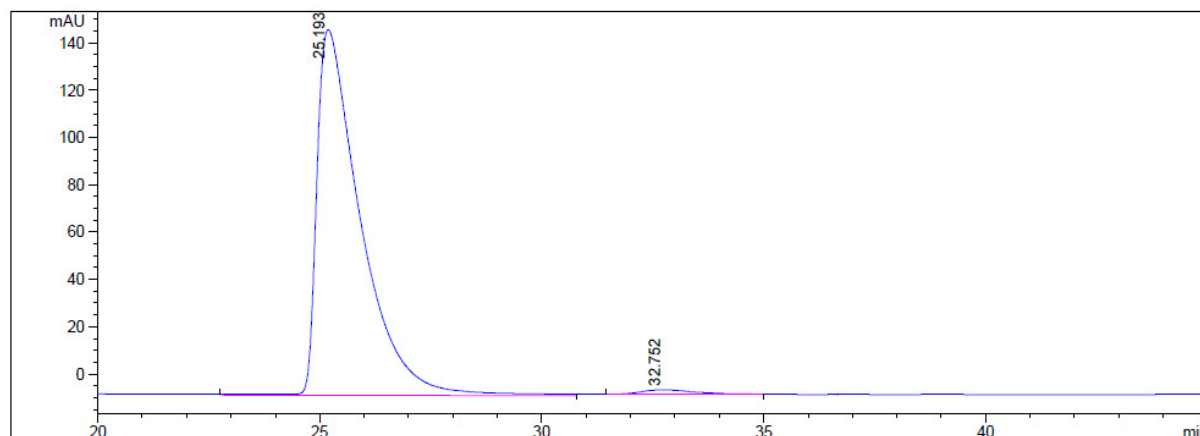

| # | Meas. Ret. Time | Height  | Height % | Area      | Area % |
|---|-----------------|---------|----------|-----------|--------|
| 1 | 25.193          | 154.763 | 98.657   | 10558.085 | 98.114 |
| 2 | 32.752          | 2.107   | 1.343    | 202.923   | 1.886  |

**(R)-Dimethyl 2-(8-methyl-4,10-dihydrobenzo[6,7]oxepino[4,3-c]isoxazol-10-yl)malonate (5q)**

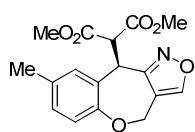

Following the general procedure, the title compound **5q** was obtained after FC (petane-EtOAc 6:1) as a white solid (55%, 95% ee).  $[\alpha]_D^{20} = +122$  (*c* 1.24, CHCl<sub>3</sub>); **<sup>1</sup>H NMR** (300

MHz, CDCl<sub>3</sub>):  $\delta$  = 8.03 (q, *J* = 1.1 Hz, 1H), 7.12 (dd, *J* = 2.2, 0.9 Hz, 1H), 7.02 (ddd, *J* =

8.1, 2.2, 0.8 Hz, 1H), 6.94 (d, *J* = 8.1 Hz, 1H), 5.31 (dd, *J* = 14.6, 1.2 Hz, 1H), 4.81 (d, *J* = 10.8 Hz, 1H), 4.71 (dd, *J* = 14.6, 1.4 Hz, 1H), 4.46 (d, *J* = 11.2 Hz, 1H), 3.60 (s, 3H), 3.49 (s, 3H), 2.23 (s, 3H); **<sup>13</sup>C NMR** (75

MHz, CDCl<sub>3</sub>):  $\delta$  = 167.6, 167.5, 159.1, 155.1, 153.2, 135.1, 131.7, 131.6, 130.7, 122.6, 116.2, 65.9, 56.1, 52.8, 52.6, 41.3, 20.9; **HRMS** (ESI<sup>+</sup>) calculated for C<sub>17</sub>H<sub>17</sub>NO<sub>6</sub>+Na<sup>+</sup> [M+Na]<sup>+</sup>: *m/z* = 354.0948, found 354.0948;

**IR**:  $\nu_{\max}$  3132, 3005, 2956, 2921, 2876, 2361, 2343, 1757, 1729, 1606, 1499, 1427, 1420, 1263, 1242, 1232, 1218, 1143, 1123, 1105, 1011, 881, 843, 828; **HPLC**: IA, Pentane:*i*-PrOH 90:10, *F* = 1.0 mL/min,  $\lambda$  = 230 nm: *t<sub>R</sub>* major = 19.4 min, *t<sub>R</sub>* minor = 15.6 min.

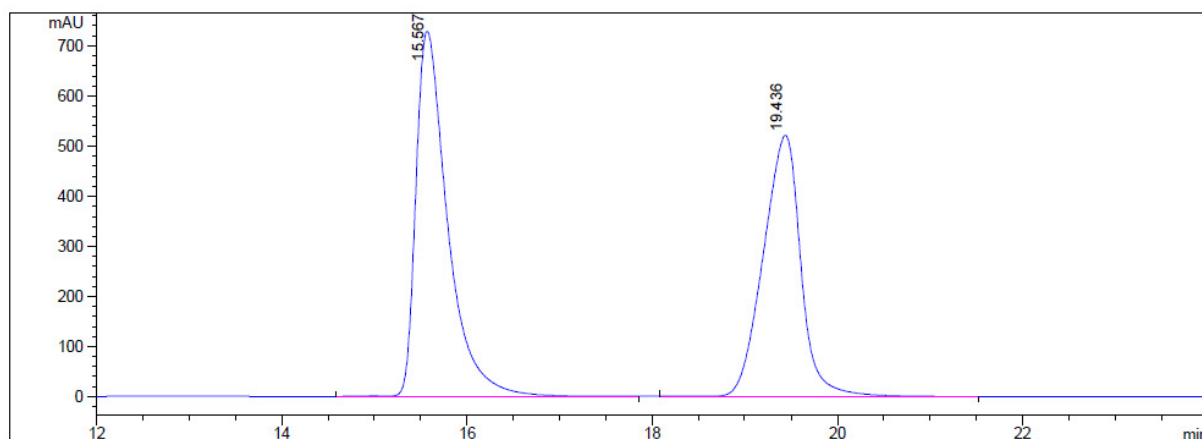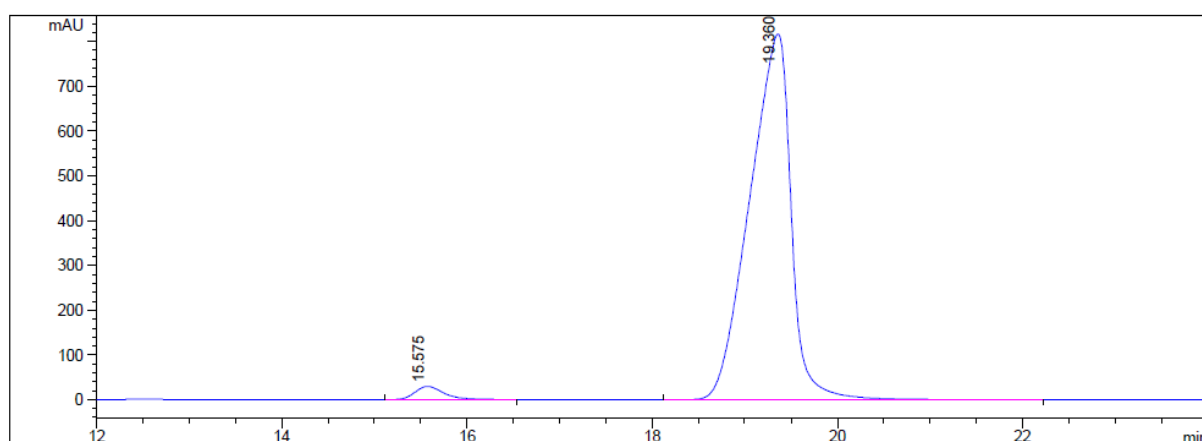



**(R)-Dimethyl 2-(8-methoxy-4,10-dihydrobenzo[6,7]oxepino[4,3-c]isoxazol-10-yl)malonate (5r)**

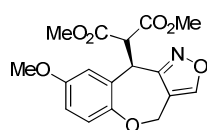

Following the general procedure, the title compound **5r** was obtained after FC (petane-

EtOAc 6:1) as a white solid (56%, 94% ee).  $[\alpha]_D^{20} = +109$  ( $c$  1.59,  $\text{CHCl}_3$ );  $^1\text{H NMR}$

(300 MHz,  $\text{CDCl}_3$ ):  $\delta$  = 8.10 (d,  $J$  = 1.0 Hz, 1H), 7.04 (d,  $J$  = 8.7 Hz, 1H), 6.91 (d,

$J$  = 3.0 Hz, 1H), 6.79 (dd,  $J$  = 8.7, 3.0 Hz, 1H), 5.34 (dd,  $J$  = 14.5, 1.1 Hz, 1H), 4.87 (dd,  $J$  = 11.2, 0.8 Hz, 1H),

4.76 (dd,  $J$  = 14.5, 1.4 Hz, 1H), 4.53 (d,  $J$  = 11.2 Hz, 1H), 3.76 (s, 3H), 3.66 (s, 3H), 3.57 (s, 3H);  $^{13}\text{C NMR}$

(75 MHz,  $\text{CDCl}_3$ ):  $\delta$  = 167.5, 167.4, 158.9, 156.6, 153.3, 150.9, 132.7, 123.6, 116.2, 116.0, 115.2, 66.0, 56.1,

55.8, 52.9, 52.7, 41.4; **HRMS** ( $\text{ESI}^+$ ) calculated for  $\text{C}_{17}\text{H}_{17}\text{NO}_7 + \text{Na}^+$   $[\text{M} + \text{Na}]^+$ :  $m/z$  = 370.0897, found

370.0892; **IR**:  $\nu_{\text{max}}$  3017, 2958, 2833, 2362, 2343, 1761, 1740, 1615, 1601, 1583, 1495, 1431, 1419, 1291,

1236, 1221, 1204, 1193, 1167, 1150, 1118, 1108, 1038, 1028, 1014, 925, 892, 830, 674, 665; **HPLC**: IA,

Pentane:*i*-PrOH 90:10,  $F$  = 1.0 mL/min,  $\lambda$  = 230 nm:  $t_R$  major = 30.6 min,  $t_R$  minor = 25.0 min.

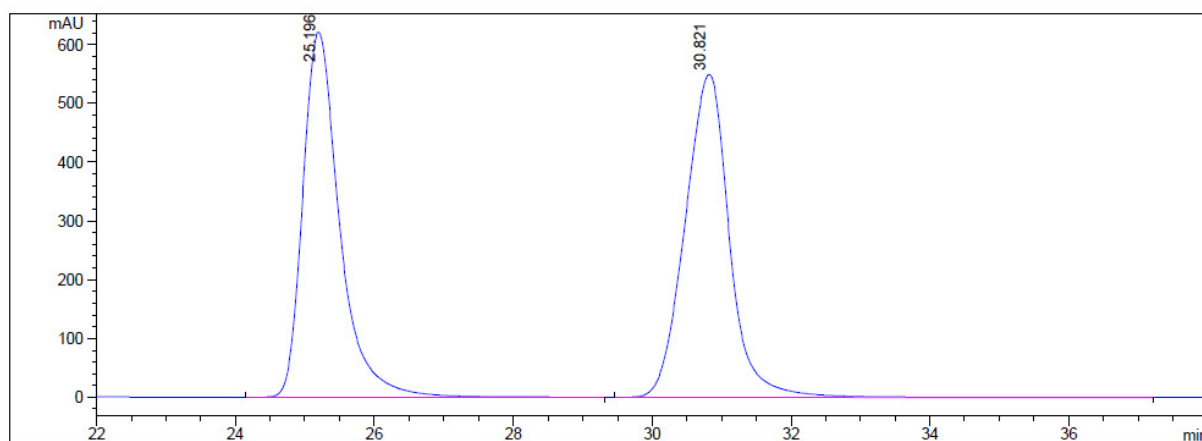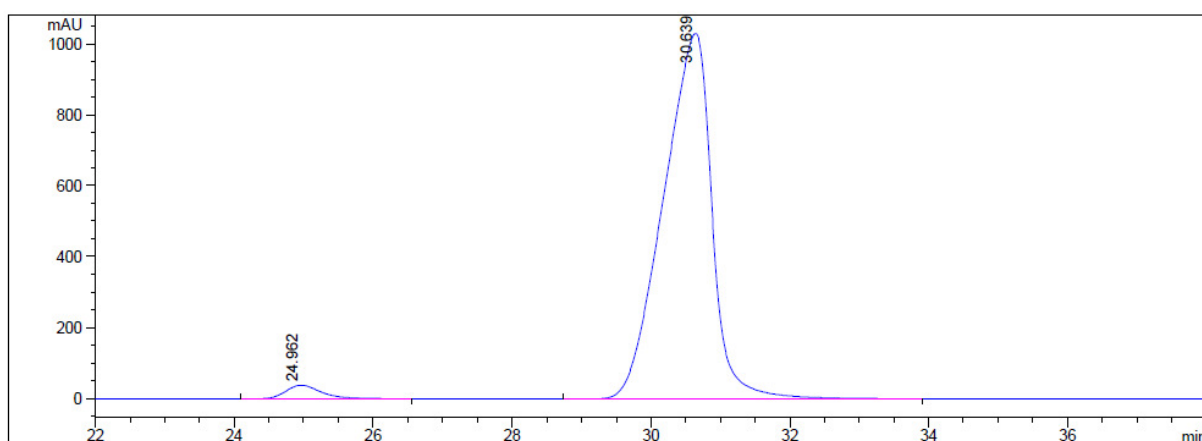

**(R)-Dimethyl 2-(8-chloro-4,10-dihydrobenzo[6,7]oxepino[4,3-c]isoxazol-10-yl)malonate (5s)**

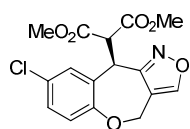

Following the general procedure, the title compound **5s** was obtained after FC (petane-EtOAc 8:1) as a white solid (56%, 93% ee).  $[\alpha]_D^{20} = +94$  ( $c$  0.76,  $\text{CHCl}_3$ );  $^1\text{H NMR}$  (300 MHz,  $\text{CDCl}_3$ ):  $\delta$  = 8.13 (d,  $J$  = 1.1 Hz, 1H), 7.40 (d,  $J$  = 2.6 Hz, 1H), 7.28 – 7.24 (m, 1H), 7.07 (d,  $J$  = 8.5 Hz, 1H), 5.40 (dd,  $J$  = 14.6, 1.2 Hz, 1H), 4.93 – 4.84 (m, 1H), 4.79 (dd,  $J$  = 14.6, 1.4 Hz, 1H), 4.48 (d,  $J$  = 11.1 Hz, 1H), 3.67 (s, 3H), 3.60 (s, 3H);  $^{13}\text{C NMR}$  (75 MHz,  $\text{CDCl}_3$ ):  $\delta$  = 167.3, 167.2, 158.4, 155.9, 153.5, 133.7, 131.2, 130.6, 130.2, 124.4, 115.8, 66.1, 56.0, 53.0, 52.8, 41.0; **HRMS** ( $\text{ESI}^+$ ) calculated for  $\text{C}_{16}\text{H}_{14}\text{ClNO}_6 + \text{Na}^+$   $[\text{M} + \text{Na}]^+$ :  $m/z$  = 374.0402, found 374.0398; **IR**:  $\nu_{\text{max}}$  2978, 2958, 2923, 2852, 2358, 1756, 1733, 1601, 1487, 1458, 1443, 1435, 1417, 1326, 1300, 1262, 1175, 1153, 1116, 1102, 1007, 900, 890, 841, 681, 667, 608, 592; **HPLC**: IA, Pentane:*i*-PrOH 90:10,  $F$  = 1.0 mL/min,  $\lambda$  = 230 nm:  $t_R$  major = 28.2 min,  $t_R$  minor = 24.5 min.

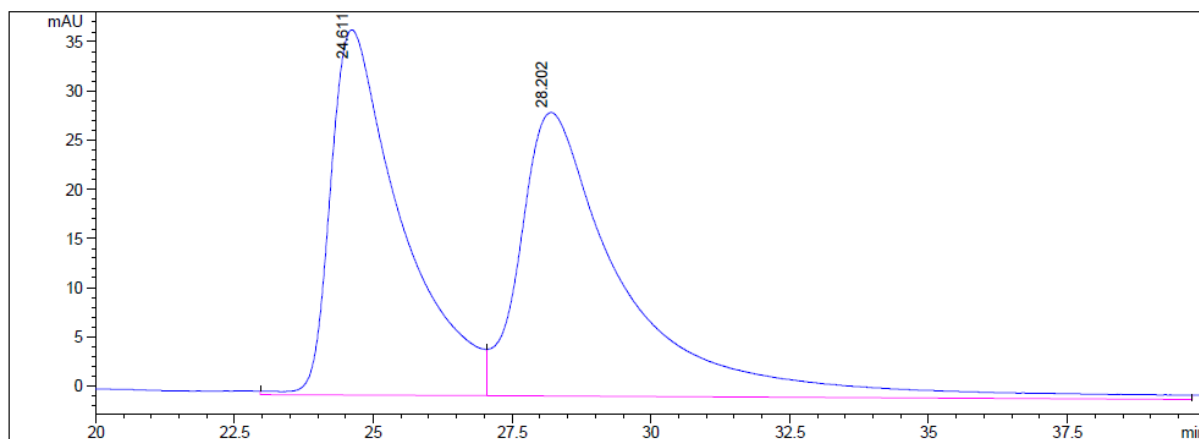

| # | Meas. Ret. Time | Height | Height % | Area     | Area % |
|---|-----------------|--------|----------|----------|--------|
| 1 | 24.611          | 37.108 | 56.290   | 3304.087 | 46.277 |
| 2 | 28.202          | 28.815 | 43.710   | 3835.777 | 53.723 |

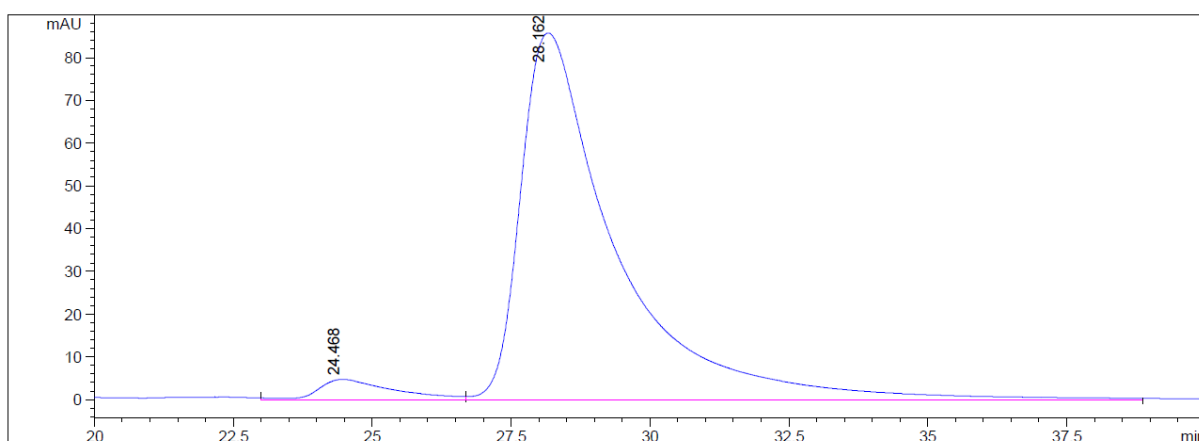

| # | Meas. Ret. Time | Height | Height % | Area      | Area % |
|---|-----------------|--------|----------|-----------|--------|
| 1 | 24.468          | 4.865  | 5.362    | 471.713   | 4.372  |
| 2 | 28.162          | 85.863 | 94.638   | 10316.749 | 95.628 |

### Proposed mechanism for the formation of conjugated nitriles **6** side-products

Only in the cases of the F, Br and Cl substituted derivatives **4**, nitriles **6** were formed and isolated as side-products. The formation of **6** can be rationalized by the relative higher acidity of the benzylic position in these compounds due to the electron-withdrawing nature of the halogen substituents. Subsequently, we propose that after the formation of the nitrile oxide **11**, under the basic conditions employed, the malonate moiety might also be deprotonated to form the corresponding enolate **12**. This could now undergo a proton shift in the cases that the benzylic proton has the appropriate acidity, leading to the ethenone oxime **13**. Finally, the expulsion of the hydroxyl group would lead to the observed unsaturated nitrile **6**.

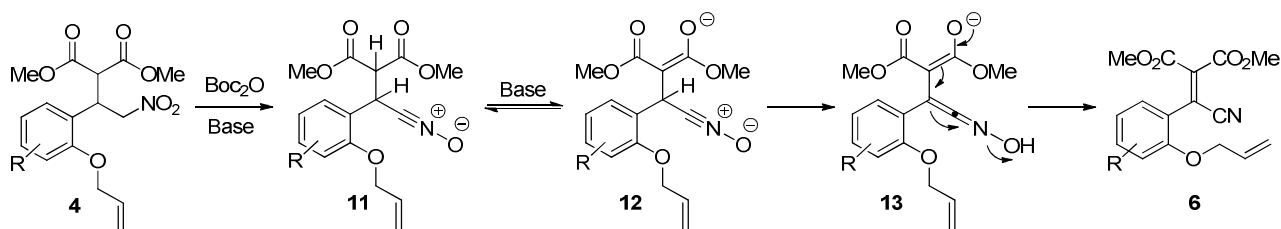

### Dimethyl 2-((2-(allyloxy)-5-fluorophenyl)(cyano)methylene)malonate (**6k**)

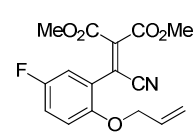

The title compound **6k** was obtained after FC (petane-EtOAc 5:1) as yellow oil (27%).

**<sup>1</sup>H NMR** (300 MHz, CDCl<sub>3</sub>): δ = 7.11 (ddd, *J* = 9.1, 7.8, 3.1 Hz, 1H), 7.01 (dd, *J* = 8.2, 3.1 Hz, 1H), 6.02 (ddt, *J* = 17.3, 10.5, 5.2 Hz, 1H), 5.40 (dq, *J* = 17.3, 1.5 Hz, 1H), 5.30 (dq, *J* = 10.6, 1.4 Hz, 1H), 4.59 (dt, *J* = 5.3, 1.6 Hz, 2H), 3.94 (s, 3H), 3.66 (s, 3H); **<sup>13</sup>C NMR** (75 MHz, CDCl<sub>3</sub>):

δ = 163.1, 161.9, 156.6 (d, <sup>1</sup>*J* = 242.6 Hz), 152.2 (d, <sup>3</sup>*J* = 2.8 Hz), 139.6, 132.2, 122.0 (d, <sup>4</sup>*J* = 1.3 Hz), 121.9 (d, <sup>4</sup>*J* = 1.5 Hz), 118.7 (d, <sup>2</sup>*J* = 22.9 Hz), 118.5, 116.6 (d, <sup>2</sup>*J* = 25.2 Hz), 114.8, 114.3 (d, <sup>3</sup>*J* = 8.1 Hz), 70.5, 53.7, 53.1; **<sup>19</sup>F NMR** (282 MHz, CDCl<sub>3</sub>): δ = -121.90; **HRMS** (ESI<sup>+</sup>) calculated for C<sub>16</sub>H<sub>14</sub>FNO<sub>5</sub>+Na<sup>+</sup> [M+Na]<sup>+</sup>: *m/z* = 342.0748, found 342.0754; **IR**: ν<sub>max</sub> 2363, 2343, 1736, 1612, 1590, 1493, 1456, 1436, 1426, 1371, 1303, 1256, 1194, 1180, 1152, 1126, 1083, 1028, 994, 935, 878, 843, 813, 750.

### Dimethyl 2-((2-(allyloxy)-5-bromophenyl)(cyano)methylene)malonate (**6l**)

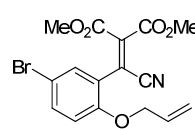

The title compound **6l** was obtained after FC (petane-EtOAc 5:1) as a yellow oil (34%).

**<sup>1</sup>H NMR** (300 MHz, CDCl<sub>3</sub>): δ = 7.49 (dd, *J* = 8.9, 2.4 Hz, 1H), 7.38 (d, *J* = 2.4 Hz, 1H), 6.82 (d, *J* = 8.9 Hz, 1H), 6.00 (ddt, *J* = 17.3, 10.4, 5.1 Hz, 1H), 5.40 (dq, *J* = 17.3, 1.6 Hz, 1H), 5.31 (dq, *J* = 10.6, 1.4 Hz, 1H), 4.60 (dt, *J* = 5.2, 1.6 Hz, 2H), 3.94 (s, 3H), 3.67 (s, 3H); **<sup>13</sup>C NMR** (75 MHz, CDCl<sub>3</sub>):

δ = 163.1, 161.8, 155.0, 139.6, 135.2, 132.3, 131.9, 122.7, 121.7, 118.6, 114.8, 114.6, 113.0, 70.1, 53.7, 53.1; **HRMS** (ESI<sup>+</sup>) calculated for C<sub>16</sub>H<sub>14</sub>BrNO<sub>5</sub>+Na<sup>+</sup> [M+Na]<sup>+</sup>: *m/z* = 401.9948, found 401.9951; **IR**: ν<sub>max</sub> 2951, 1779, 1735, 1615, 1591, 1483, 1455, 1435, 1400, 1371, 1264, 1242, 1146, 1121, 1093, 1026, 990, 931, 813, 764, 722.

### Dimethyl 2-((2-(allyloxy)-4,6-dichlorophenyl)(cyano)methylene)malonate (**6m**)

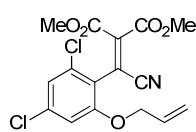

The title compound **6m** was obtained after FC (petane-EtOAc 4:1) as a white solid (25%).

**<sup>1</sup>H NMR** (300 MHz, CDCl<sub>3</sub>): δ = 6.95 (d, *J* = 2.0 Hz, 1H), 6.71 (d, *J* = 2.0 Hz, 1H), 5.99 (ddt, *J* = 17.2, 10.7, 5.4 Hz, 1H), 5.62 – 5.03 (m, 2H), 4.52 (dq, *J* = 5.5, 1.5 Hz, 2H), 3.71 (s, 3H), 3.42 (s, 3H); **HRMS** (ESI<sup>+</sup>) calculated for C<sub>16</sub>H<sub>13</sub>Cl<sub>2</sub>NO<sub>5</sub>+Na<sup>+</sup> [M+Na]<sup>+</sup>: *m/z* = 369.0171, found 369.01714.

### Dimethyl 2-((2-(allyloxy)-5-chlorophenyl)(cyano)methylene)malonate (**6s**)

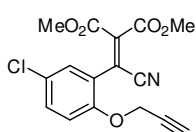

The title compound **6s** was obtained after FC (petane-EtOAc 8:1) as a yellow oil (26%).

**<sup>1</sup>H NMR** (300 MHz, CDCl<sub>3</sub>): δ = 7.40 (dd, *J* = 8.9, 2.6 Hz, 1H), 7.29 (d, *J* = 2.5 Hz, 1H), 7.06 (d, *J* = 8.9 Hz, 1H), 4.73 (d, *J* = 2.4 Hz, 2H), 3.94 (s, 3H), 3.69 (s, 3H), 2.57 (t, *J* = 2.4 Hz, 1H); **<sup>13</sup>C NMR** (75 MHz, CDCl<sub>3</sub>): δ = 163.0, 161.8, 153.4, 140.0, 132.2, 129.7, 127.0, 122.7, 121.2, 114.8, 114.6, 77.3, 77.1, 56.9, 53.7, 53.2; **HRMS** (ESI<sup>+</sup>) calculated for C<sub>16</sub>H<sub>12</sub>ClNO<sub>5</sub>+Na<sup>+</sup> [M+Na]<sup>+</sup>: *m/z* = 356.0296, found 356.0297. **IR**: ν<sub>max</sub> 3287, 2957, 1733, 1614, 1572, 1484, 1453, 1436, 1405, 1372, 1267, 1249, 1223, 1146, 1104, 1086, 1017, 990, 929, 891, 879, 813, 764, 675, 644, 612.

### Synthesis of bioactive compound *ent*-8

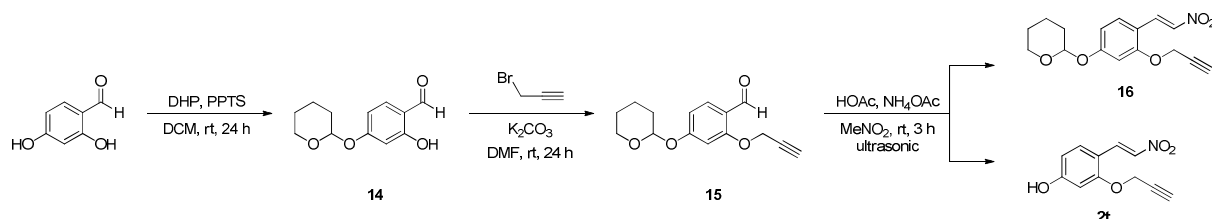

### 2-Hydroxy-4-((tetrahydro-2H-pyran-2-yl)oxy)benzaldehyde (**14**)

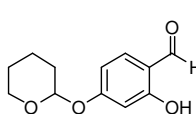

To a suspension of 2,4-dihydroxybenzaldehyde (2.00 g, 14.48 mmol, 1.0 equiv.) and pyridinium-4-toluolsulfonate (35.7 mg, 0.14 mmol, 0.01 equiv.) in 70 mL DCM a solution of dihydropyran (1.45 mL, 15.93 mmol, 1.1 equiv.) in 24 mL DCM was slowly added.

After stirring the reaction mixture for 1.5 h at room temperature, the reaction mixture was washed with saturated NaCl (aq.) and dried over Na<sub>2</sub>SO<sub>4</sub> and the solvent removed in vacuo. The residue was purified by column chromatography (pentane-EtOAc: 20:1), affording **14** (2.32 g, 10.42 mmol, 72%) as a colorless oil. **<sup>1</sup>H NMR** (400 MHz, CDCl<sub>3</sub>): δ = 11.35 (s, 1H), 9.71 (d, *J* = 0.7 Hz, 1H), 7.42 (d, *J* = 8.6 Hz, 1H), 6.64 (dd, *J* = 8.6, 2.3 Hz, 1H), 6.61 (d, *J* = 2.3 Hz, 1H), 5.49 (t, *J* = 3.2 Hz, 1H), 3.81 (ddd, *J* = 11.3, 9.8, 3.1 Hz, 1H), 3.62 (dtd, *J* = 11.4, 4.1, 1.5 Hz, 1H), 1.97 (dddd, *J* = 13.7, 12.0, 6.9, 3.2 Hz, 1H), 1.86 (ddd, *J* = 6.7, 4.6, 3.2 Hz, 2H), 1.77 – 1.63 (m, 2H), 1.65 – 1.52 (m, 1H); **<sup>13</sup>C NMR** (101 MHz, CDCl<sub>3</sub>): δ = 194.6, 164.4, 164.2, 135.4, 115.8, 109.5, 103.7, 96.3, 62.3, 30.0, 25.0, 18.5; **HRMS** (ESI<sup>+</sup>): calculated for C<sub>12</sub>H<sub>14</sub>O<sub>4</sub>+Na<sup>+</sup> [M+Na]<sup>+</sup>: *m/z* = 245.0784, found 245.0790.

## 2-(Prop-2-yn-1-yloxy)-4-((tetrahydro-2H-pyran-2-yl)oxy)benzaldehyde (**15**)

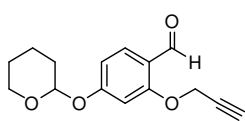

An ordinary vial equipped with a magnetic stirring bar was charged with **14** (2.23 g, 10.03 mmol, 1.0 equiv.), K<sub>2</sub>CO<sub>3</sub> (1.53 g, 11.04 mmol, 1.1 equiv.) and DMF (15 mL, 0.6 M). To the stirring solution, propargyl bromide (80%, 1.23 mL, 11.04 mmol, 1.1 equiv.) was added dropwise. After stirring the solution for 5 h water was added and the mixture extracted 3 times with DCM. The combined organic phases were dried over Na<sub>2</sub>SO<sub>4</sub> and concentrated. The residue was purified by column chromatography (pentane-EtOAc: 20:1) to obtain **15** (2.46 g, 9.44 mmol, 94%) as a light yellow oil. <sup>1</sup>H NMR (300 MHz, CD<sub>2</sub>Cl<sub>2</sub>): δ = 10.28 (d, *J* = 0.8 Hz, 1H), 7.76 (d, *J* = 8.5 Hz, 1H), 6.87 – 6.57 (m, 2H), 5.51 (t, *J* = 3.1 Hz, 1H), 4.82 (d, *J* = 2.4 Hz, 2H), 3.83 (ddd, *J* = 11.4, 9.6, 3.3 Hz, 1H), 3.61 (dtd, *J* = 11.5, 4.1, 1.4 Hz, 1H), 2.66 (t, *J* = 2.4 Hz, 1H), 2.06 – 1.92 (m, 1H), 1.92 – 1.79 (m, 2H), 1.77 – 1.43 (m, 4H); <sup>13</sup>C NMR (75 MHz, CD<sub>2</sub>Cl<sub>2</sub>): δ = 188.3, 164.1, 161.9, 130.5, 120.4, 110.0, 101.8, 97.1, 78.2, 76.7, 62.7, 57.0, 30.6, 25.6, 19.1; HRMS (ESI<sup>+</sup>): calculated for C<sub>15</sub>H<sub>16</sub>O<sub>4</sub>+Na<sup>+</sup> [M+Na]<sup>+</sup>: *m/z* = 283.0941, found 283.0944.

## (E)-2-(4-(2-Nitrovinyl)-3-(prop-2-yn-1-yloxy)phenoxy)tetrahydro-2H-pyran (**16**) and (E)-4-(2-nitrovinyl)-3-(prop-2-yn-1-yloxy)phenol (**2t**)

Aldehyde **15** (1.30 g, 4.99 mmol, 1.0 equiv.) was treated with nitromethane (3.23 mL, 60.34 mmol, 12.1 equiv.), acetic acid (828 μL, 14.47 mmol, 2.9 equiv.) and NH<sub>4</sub>OAc (846 mg, 10.98 mmol, 2.2 equiv.) at rt under ultrasound irradiation for 3 h. The corresponding nitroolefins **16** (1.07 g, 3.54 mmol, 71%) and **2t** (0.31 g, 1.39 mmol, 28%) were then isolated by column chromatography (pentane-EtOAc: 10:1→4:1).

### (E)-2-(4-(2-Nitrovinyl)-3-(prop-2-yn-1-yloxy)phenoxy)tetrahydro-2H-pyran (**16**)

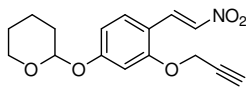

Not stable under slightly acidic conditions! <sup>1</sup>H NMR (300 MHz, CDCl<sub>3</sub>): δ = 8.04 (d, *J* = 13.6 Hz, 1H), 7.75 (d, *J* = 13.5 Hz, 1H), 7.32 (d, *J* = 8.3 Hz, 1H), 6.76 – 6.60 (m, 2H), 5.43 (t, *J* = 3.0 Hz, 1H), 4.74 (d, *J* = 2.5 Hz, 2H), 3.79 (ddd, *J* = 11.2, 9.7, 3.2 Hz, 1H), 3.57 (dtd, *J* = 11.4, 4.0, 1.6 Hz, 1H), 2.53 (t, *J* = 2.4 Hz, 1H), 2.01 – 1.87 (m, 1H), 1.82 (dt, *J* = 5.6, 3.6 Hz, 2H), 1.75 – 1.41 (m, 4H); <sup>13</sup>C NMR (75 MHz, CDCl<sub>3</sub>): δ = 161.8, 159.0, 136.6, 135.5, 134.0, 113.3, 109.8, 101.7, 96.6, 77.4, 76.8, 62.3, 56.4, 30.2, 25.1, 18.6. HRMS (ESI<sup>+</sup>) calculated for C<sub>16</sub>H<sub>17</sub>NO<sub>5</sub>+Na<sup>+</sup> [M+Na]<sup>+</sup>: *m/z* = 326.0999, found 326.0996.

### (E)-4-(2-Nitrovinyl)-3-(prop-2-yn-1-yloxy)phenol (**2t**)

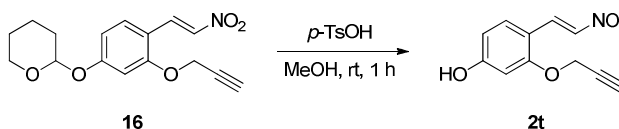

To a solution of nitroolefin **16** (1.00 g, 3.30 mmol, 1.0 equiv.) in MeOH (83 mL, 0.04 M), *p*-TsOH (56.6 mg, 0.33 mmol, 0.1 equiv.) was added and stirred at rt for 1 h until completion of reaction (followed by TLC). The

residue was purified by column chromatography (pentane-EtOAc: 4:1), affording **2t** as a yellow-orange solid (0.70 g, 3.20 mmol, 97%). <sup>1</sup>H NMR (300 MHz, DMSO-*d*<sub>6</sub>) δ = 10.65 (s, 1H), 8.12 (d, *J* = 13.4 Hz, 1H), 7.98 (d, *J* = 13.4 Hz, 1H), 7.66 (d, *J* = 8.5 Hz, 1H), 6.60 (d, *J* = 2.2 Hz, 1H), 6.51 (dd, *J* = 8.5, 2.2 Hz, 1H), 4.95 (d, *J* = 2.4 Hz, 2H), 3.70 (t, *J* = 2.3 Hz, 1H), 3.38 (br.s, 1H); <sup>13</sup>C NMR (75 MHz, DMSO): δ = 163.4, 159.2, 135.4, 134.8, 134.0, 110.2, 109.6, 100.7, 79.1, 78.6, 56.2. HRMS (ESI<sup>+</sup>): calculated for C<sub>11</sub>H<sub>9</sub>NO<sub>4</sub>+Na<sup>+</sup> [M+Na]<sup>+</sup>: *m/z* = 242.0424, found 242.0429.

**(*E*)-4-((4-Bromobenzyl)oxy)-1-(2-nitrovinyl)-2-(prop-2-yn-1-yloxy)benzene (7t)**

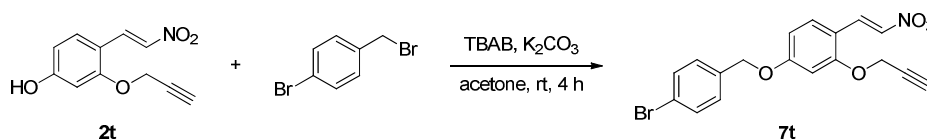

To a solution of nitroolefin **2t** (600 mg, 2.74 mmol, 1.0 equiv.) and 4-bromobenzyl bromide (685 mg, 2.74 mmol, 1.0 equiv.) in acetone (8.5 mL, 0.33 M), K<sub>2</sub>CO<sub>3</sub> (379 mg, 2.74 mmol, 1.0 equiv.) and TBAB (177 mg, 0.55 mmol, 0.2 equiv.) were added and stirred at rt for 4 h until completion of reaction (followed by TLC). The residue was purified by column chromatography (pentane-EtOAc: 4:1) affording **7t** as a yellow-orange solid (0.70 g, 3.20 mmol, 97%). <sup>1</sup>H NMR (300 MHz, CDCl<sub>3</sub>): δ = 8.09 (d, *J* = 13.6 Hz, 1H), 7.80 (d, *J* = 13.5 Hz, 1H), 7.59 – 7.46 (m, 2H), 7.40 (d, *J* = 8.5 Hz, 1H), 7.35 – 7.27 (m, 2H), 6.70 – 6.60 (m, 2H), 5.08 (s, 2H), 4.79 (d, *J* = 2.4 Hz, 2H), 2.58 (t, *J* = 2.4 Hz, 1H); <sup>13</sup>C NMR (75 MHz, CDCl<sub>3</sub>): δ = 163.0, 159.0, 136.6, 135.3, 135.0, 134.2, 132.1 (2C), 129.3 (2C), 122.5, 113.2, 107.8, 100.8, 77.3, 77.0, 69.8, 56.4. HRMS (ESI<sup>+</sup>) calculated for C<sub>18</sub>H<sub>14</sub>BrNO<sub>4</sub>+Na<sup>+</sup> [M+Na]<sup>+</sup>: *m/z* = 409.9998, found 410.0003.

**Dimethyl (*S*)-2-(7-((4-bromobenzyl)oxy)-4H,10H-benzo[6,7]oxepino[4,3-*c*]isoxazol-10-yl)malonate (*ent*-5t)**

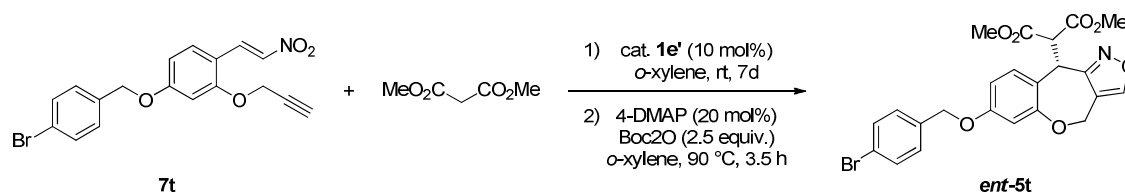

An ordinary vial equipped with a magnetic stirring bar was charged with catalyst **1e'** (10 mol%), malonate **3** (41.4 μL, 0.36 mmol, 1.2 equiv.), nitroolefin **7t** (77.6 mg, 0.30 mmol, 1.0 equiv.) and *o*-xylene (1.5 mL) at rt. The stirring was maintained at rt for 7 d. The crude reaction mixture was directly charged onto silica-gel and purified by column chromatography (pentane-EtOAc: 6:1) to afford compound **ent-4t** (93.4 mg, 0.18 mmol, 60%). <sup>1</sup>H NMR (300 MHz, CDCl<sub>3</sub>): δ = 7.56 – 7.45 (m, 2H), 7.31 – 7.26 (m, 2H), 7.06 (d, *J* = 8.4 Hz, 1H), 6.60 (d, *J* = 2.3 Hz, 1H), 6.48 (dd, *J* = 8.5, 2.4 Hz, 1H), 5.00 (dd, *J* = 13.0, 9.2 Hz, 1H), 4.95 (s, 2H),

4.85 (dd,  $J = 13.0, 4.6$  Hz, 1H), 4.71 (d,  $J = 2.4$  Hz, 2H), 4.33 (td,  $J = 9.5, 4.6$  Hz, 1H), 4.14 (d,  $J = 10.0$  Hz, 1H), 3.75 (s, 3H), 3.51 (s, 3H), 2.55 (t,  $J = 2.4$  Hz, 1H);  $^{13}\text{C}$  NMR (75 MHz,  $\text{CDCl}_3$ ):  $\delta = 168.4, 167.7, 159.7, 156.5, 135.7, 131.9$  (2C), 131.6, 129.3 (2C), 122.2, 117.0, 106.5, 101.2, 77.9, 76.3, 76.3, 69.5, 56.3, 53.0, 52.8, 52.7, 39.9; **HRMS** ( $\text{ESI}^+$ ) calculated for  $\text{C}_{23}\text{H}_{22}\text{BrNO}_8 + \text{Na}^+$   $[\text{M} + \text{Na}]^+$ :  $m/z = 544.0402$ , found 544.0394.

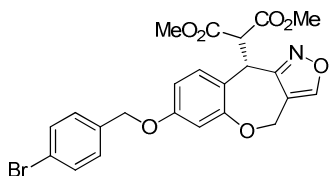

The nitro compound **ent-4t** (104.1 mg, 0.2 mmol, 1.0 equiv.) and DMAP (4.9 mg, 0.04 mmol, 0.2 equiv.) were dissolved in freshly distilled toluene (1.0 mL) and heated to 90 °C. To the hot reaction mixture, a solution of  $\text{Boc}_2\text{O}$  in toluene (0.5 M, 1.0 mL, 2.5 equiv.) was added over 20 min. The reaction was then allowed to proceed for further 3.5 h at 90 °C. After cooling to room temperature, the crude reaction mixture was directly charged onto silica-gel and purified by column chromatography to afford the titled compound **ent-5t** (58.2 mg, 0.12 mmol, 58%, 97% ee).  $^1\text{H}$  NMR (300 MHz,  $\text{CDCl}_3$ ):  $\delta = 8.11$  (d,  $J = 1.0$  Hz, 1H), 7.50 (d,  $J = 8.4$  Hz, 2H), 7.28 (dd,  $J = 8.4, 5.2$  Hz, 3H), 6.86 – 6.62 (m, 2H), 5.39 (dd,  $J = 14.6, 1.2$  Hz, 1H), 4.97 (s, 2H), 4.88 (d,  $J = 11.1$  Hz, 1H), 4.79 (dd,  $J = 14.7, 1.4$  Hz, 1H), 4.46 (d,  $J = 11.1$  Hz, 1H), 3.67 (s, 3H), 3.56 (s, 3H);  $^{13}\text{C}$  NMR (75 MHz,  $\text{CDCl}_3$ ):  $\delta = 167.6, 167.5, 159.9, 159.1, 158.4, 153.3, 135.6, 132.0, 131.9$  (2C), 129.2 (2C), 124.4, 122.2, 116.1, 111.6, 109.7, 69.5, 66.0, 56.4, 52.9, 52.7, 40.6; **HRMS** ( $\text{ESI}^+$ ) calculated for  $\text{C}_{23}\text{H}_{20}\text{BrNO}_7 + \text{Na}^+$   $[\text{M} + \text{Na}]^+$ :  $m/z = 524.0315$ , found 524.0336; **IR** (ATR):  $\nu_{\text{max}}$  2954, 2875, 1736, 1611, 1580, 1495, 1456, 1434, 1415, 1287, 1260, 1155, 1118, 1104, 1071, 1022, 1011, 946, 891, 805, 711, 559; **HPLC**: IA, Pentane:i-PrOH 70:30,  $F = 1.0$  mL/min,  $\lambda = 230$  nm,  $t_{\text{R}}$  major (*S*) = 12.3 min,  $t_{\text{R}}$  minor (*R*) = 22.2 min.

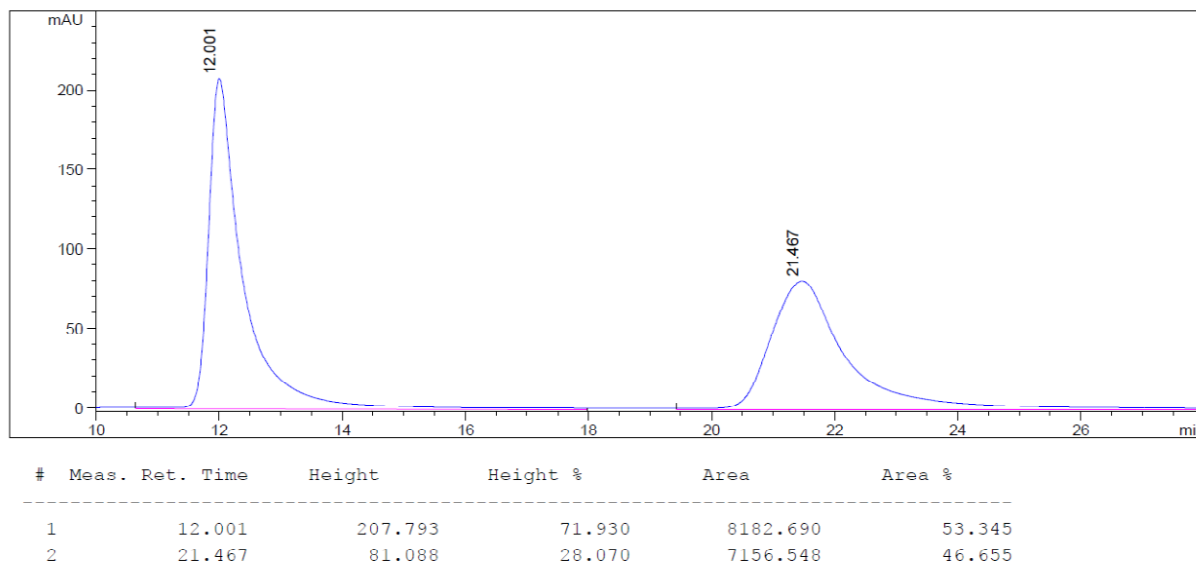



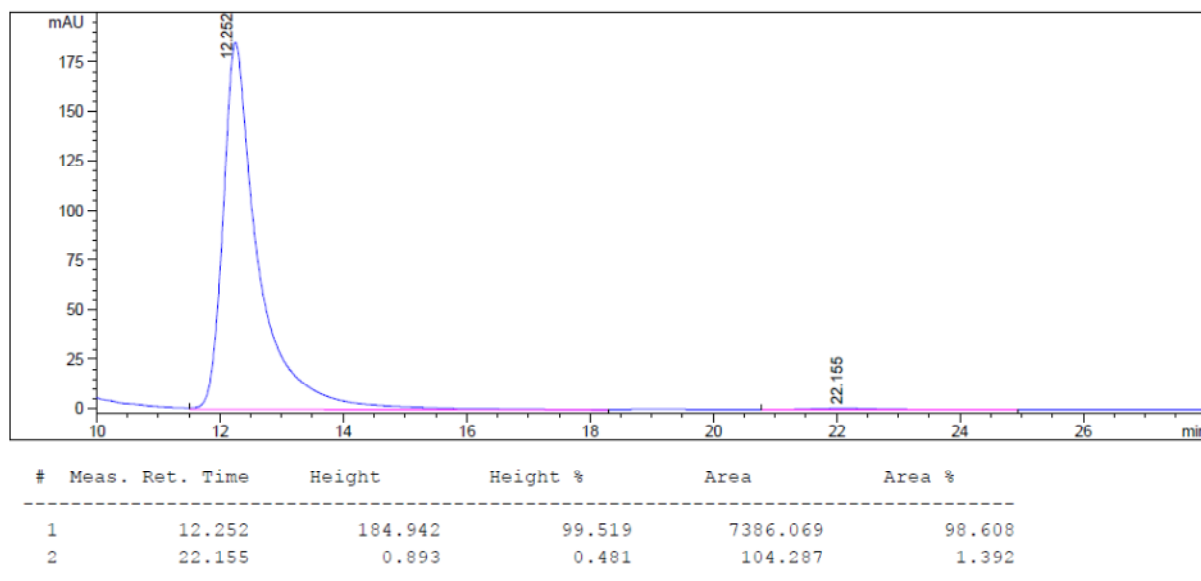

**Methyl (S)-2-(7-((4'-(trifluoromethyl)-[1,1'-biphenyl]-4-yl)methoxy)-4H,10H-benzo[6,7]oxepino[4,3-c]isoxazol-10-yl)acetate (*ent*-8)**

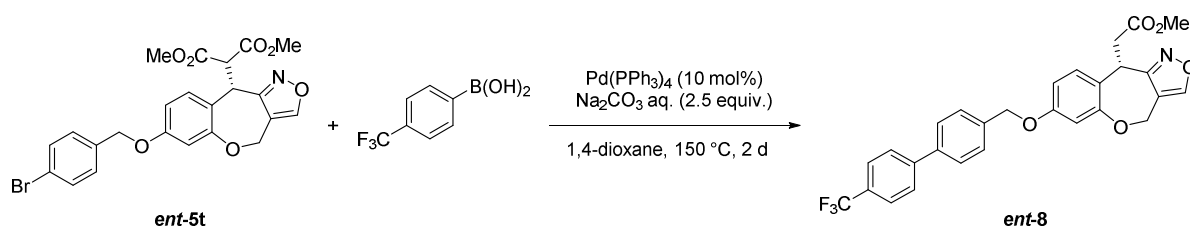

To a solution of *ent*-5t (50.2 mg, 0.1 mmol, 1.0 equiv.), boronic acid (22.8 mg, 0.12 mmol, 1.2 equiv.) and Na<sub>2</sub>CO<sub>3</sub> (26.5 mg, 0.25 mmol, 2.5 equiv.) in dry 1,4-dioxane (0.4 mL), Pd(PPh<sub>3</sub>)<sub>4</sub> (11.6 mg, 0.01 mmol, 10 mol%) and dest. water (50 µL) were added. The reaction mixture was heated at 150 °C for 2d. The crude reaction mixture was directly charged onto silica-gel and purified by column chromatography (pentane-EtOAc: 4:1) to afford the titled compound *ent*-8 as a white solid (50.4 mg, 0.99 mmol, 99%, 90% ee).  $[\alpha]_D^{20} = -108$  (*c* 0.98, CHCl<sub>3</sub>); <sup>1</sup>H NMR (600 MHz, CDCl<sub>3</sub>): δ = 8.10 (s, 1H), 7.70 (s, 4H), 7.65 – 7.59 (m, 2H), 7.55 – 7.50 (m, 1H), 7.23 (d, *J* = 8.5 Hz, 1H), 6.81 (d, *J* = 2.6 Hz, 1H), 6.76 (dd, *J* = 8.4, 2.6 Hz, 1H), 5.28 (dd, *J* = 14.5, 1.1 Hz, 1H), 5.09 (s, 2H), 4.89 (dd, *J* = 14.5, 1.4 Hz, 1H), 4.74 (dd, *J* = 9.0, 6.4 Hz, 1H), 3.63 (s, 3H), 3.18 (dd, *J* = 15.7, 9.0 Hz, 1H), 3.07 (dd, *J* = 15.7, 6.4 Hz, 1H). <sup>13</sup>C NMR (151 MHz, CDCl<sub>3</sub>): δ = 171.6, 161.2, 159.8, 158.6, 153.0, 144.3 (q, <sup>4</sup>*J* = 1.3 Hz, 2C), 139.7, 136.8, 130.3, 129.6 (q, <sup>2</sup>*J* = 32.6 Hz), 128.2 (2C), 127.7 (2C), 127.5 (2C), 126.3, 125.9 (q, <sup>3</sup>*J* = 3.7 Hz, 2C), 124.4 (d, <sup>1</sup>*J* = 272.0 Hz), 116.1, 111.5, 109.9, 70.0, 66.0, 51.9, 39.7, 37.1; HRMS (ESI<sup>+</sup>) calculated for C<sub>28</sub>H<sub>22</sub>F<sub>3</sub>NO<sub>5</sub>+Na<sup>+</sup> [M+Na]<sup>+</sup>: *m/z* = 532.1342, found 532.1341; IR (ATR): ν<sub>max</sub> 3119, 2953, 2925, 2856, 2365, 2342, 1736, 1613, 1580, 1496, 1458, 1415, 1358, 1324, 1260, 1160, 1109, 1070, 1023, 1007, 909, 885, 850, 816, 732, 647, 621, 603. HPLC: AD-H, Pentane:*i*-PrOH 80:20, F = 1.0 mL/min, λ = 230 nm, t<sub>R</sub> major (*S*) = 25.3 min, t<sub>R</sub> minor (*R*) = 22.4 min.

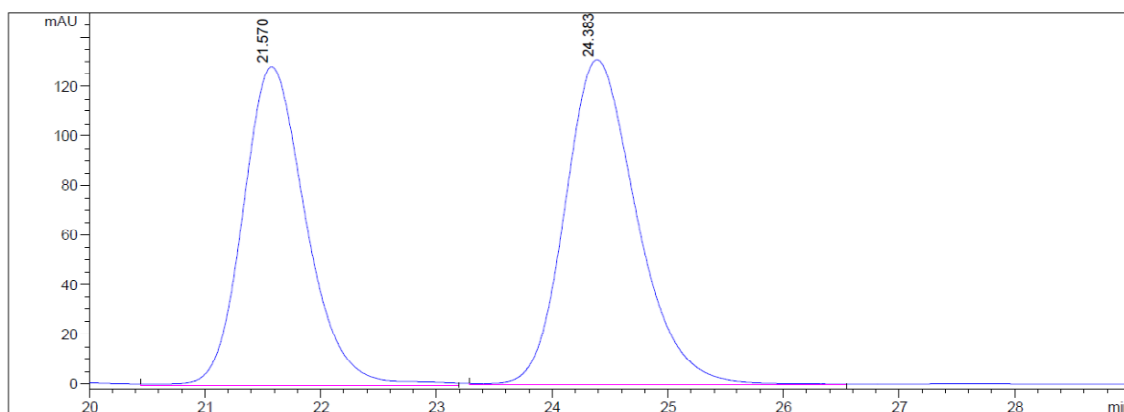

| # | Meas. Ret. Time | Height  | Height % | Area     | Area % |
|---|-----------------|---------|----------|----------|--------|
| 1 | 21.570          | 128.415 | 49.529   | 4863.388 | 46.446 |
| 2 | 24.383          | 130.856 | 50.471   | 5607.558 | 53.554 |

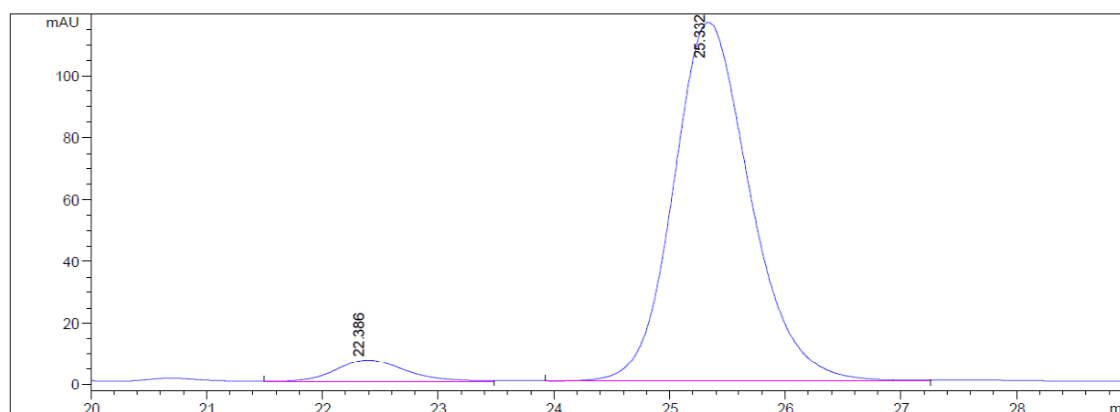

| # | Meas. Ret. Time | Height  | Height % | Area     | Area % |
|---|-----------------|---------|----------|----------|--------|
| 1 | 22.386          | 6.859   | 5.570    | 287.303  | 5.070  |
| 2 | 25.332          | 116.284 | 94.430   | 5378.982 | 94.930 |

## References:

- (1) B. Vakulya, S. Varga, A. Csámpai, T. Soós, *Org. Lett.* 2005, **7**, 1967.
- (2) J. P. Malerich, K. Hagihara, V. H. Rawal, *J. Am. Chem. Soc.* 2008, **130**, 14416.
- (3) Ł. Albrecht, G. Dickmeiss, F. Cruz Acosta, C. Rodríguez-Esrich, R. L. Davis, K. A. Jørgensen, *J. Am. Chem. Soc.* 2012, **134**, 2543.
- (4) Y.-T. Lee, Y.-J. Jang, S.-e. Syu, S.-C. Chou, C.-J. Lee, W. Lin, *Chem. Commun.* 2012, **48**, 8135.
- (5) K. Hirano, A. T. Biju, I. Piel, F. Glorius, *J. Am. Chem. Soc.* 2009, **131**, 14190.
- (6) F. Miege, C. Meyer, J. Cossy, *Angew. Chem. Int. Ed.* 2011, **50**, 5932.
- (7) K. Ramachandiran, K. Karthikeyan, D. Muralidharan, P. T. Perumal, *Tetrahedron Lett.* 2010, **51**, 3006.
- (8) B. M. Trost, C. Müller, *J. Am. Chem. Soc.* 2008, **130**, 2438.
- (9) J. McNulty, J. A. Steere, S. Wolf, *Tetrahedron Lett.* 1998, **39**, 8013.
- (10) K. Ramachandiran, K. Karthikeyan, T. Nandhakumar, D. Muralidharan, P. T. Perumal, *Synthesis* 2011, 3277.
- (11) T. Shiizu, Y. Hayashi, H. Shibafuchi, K. Teramura, *Bull. Chem. Soc. Jpn.* 1986, **59**, 2827.
- (12) H. R. Kim, H. J. Kim, J. L. Duffy, M. M. Olmstead, K. Ruhlandt-Senge, M. J. Kurth, *Tetrahedron Lett.* 1991, **32**, 4259.
- (13) Y. Basel, A. Hassner, *Synthesis* 1997, 309.

### X-Ray ORTEP and data of compound (3a*R*,10*R*)-5a

Formula C<sub>16</sub>H<sub>17</sub>NO<sub>6</sub>, *M* = 319.31

Colourless crystal, 0.25 x 0.10 x 0.08 mm

*a* = 8.2054(1), *b* = 10.5740(1), *c* = 8.6556(1) Å, β = 95.960(1)

*V* = 746.9(1) Å<sup>3</sup>, ρ<sub>calc</sub> = 1.420 gcm<sup>-3</sup>, μ = 0.923 mm<sup>-1</sup>

Empirical absorption correction (0.802 ≤ *T* ≤ 0.929)

*Z* = 2, monoclinic, space group *P*2<sub>1</sub> (No. 4)

λ = 1.54178 Å, *T* = 223(2) K

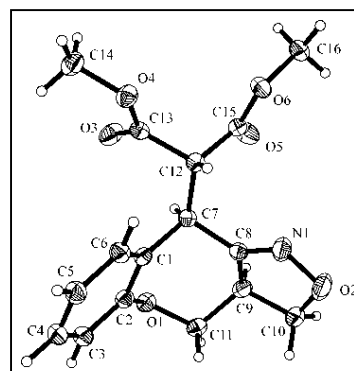

ω and φ scans, 3697 reflections collected ( $\pm h$ ,  $\pm k$ ,  $\pm l$ ),  $[(\sin\theta)/\lambda] = 0.60 \text{ \AA}^{-1}$ , 2081 independent ( $R_{int} = 0.026$ ) and 2077 observed reflections [ $I > 2\sigma(I)$ ], 210 refined parameters,  $R = 0.030$ ,  $wR^2 = 0.07$ , max. (min.) residual electron density 0.09 (-0.10) e.Å<sup>-3</sup>, the hydrogens were calculated and refined as riding atoms. Flack parameter was refined to 0.07(2).

It was possible to measure the crystal by HPLC, showing that the structure corresponds to the major enantiomer (*R,R*) of the major diastereomer pair (*R,R*)/(*S,S*).

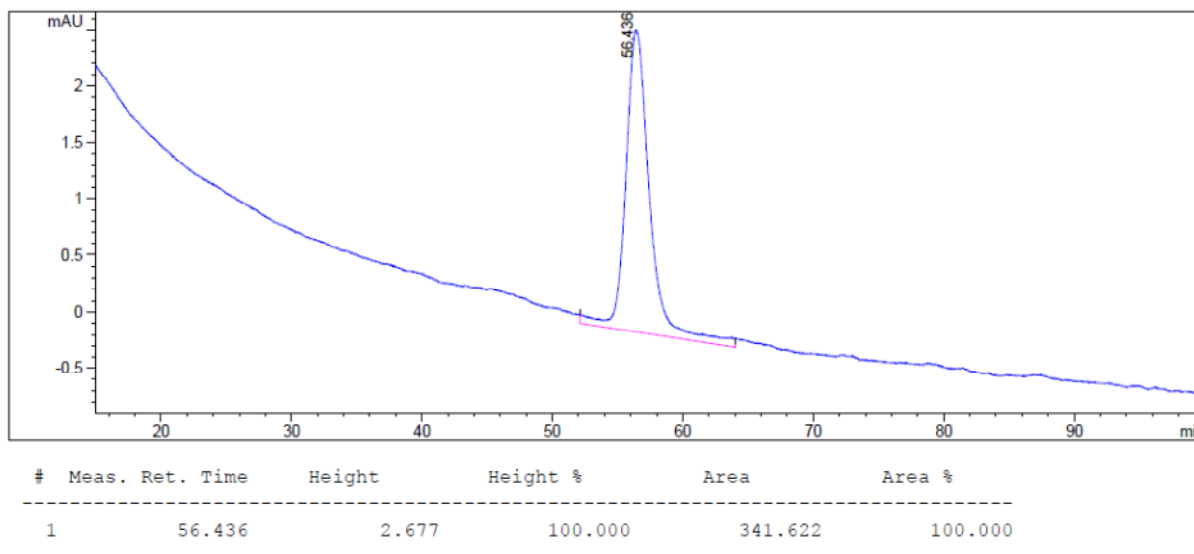

NMR Spectra:

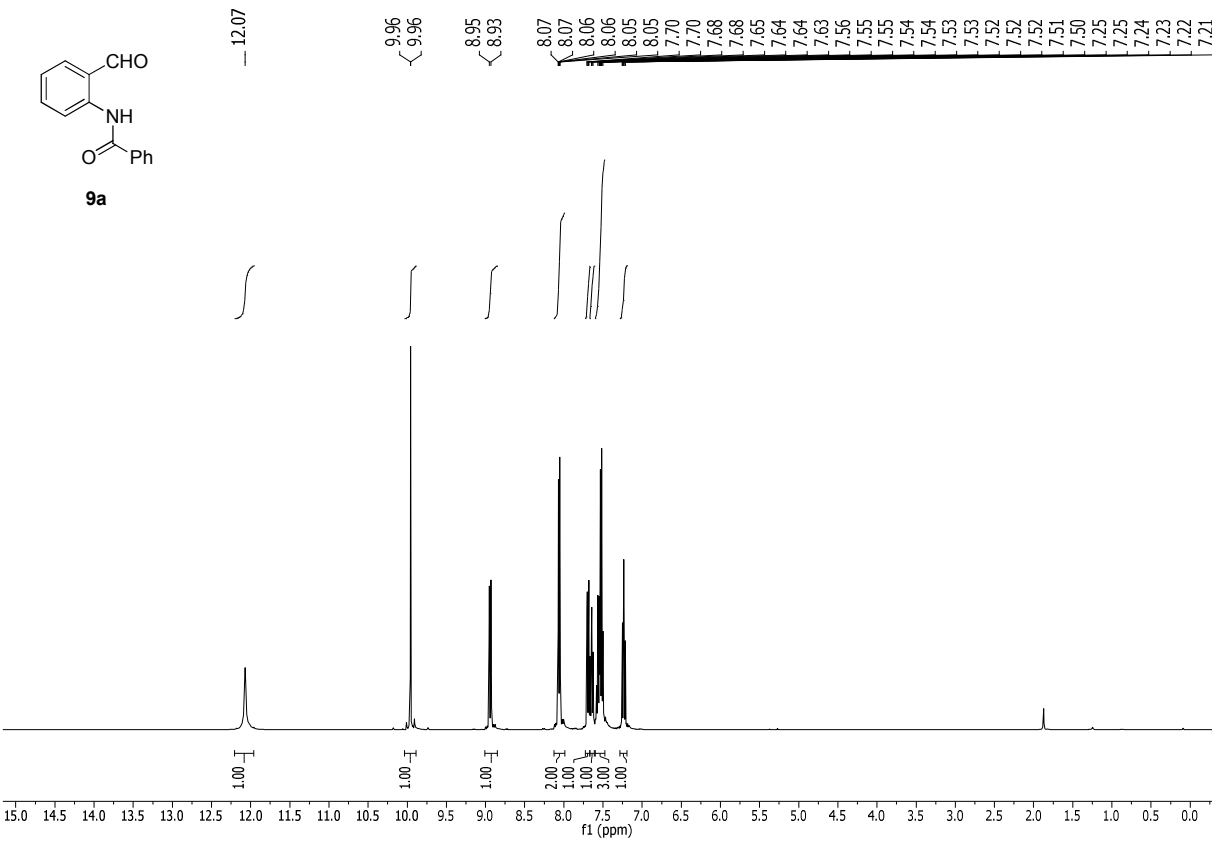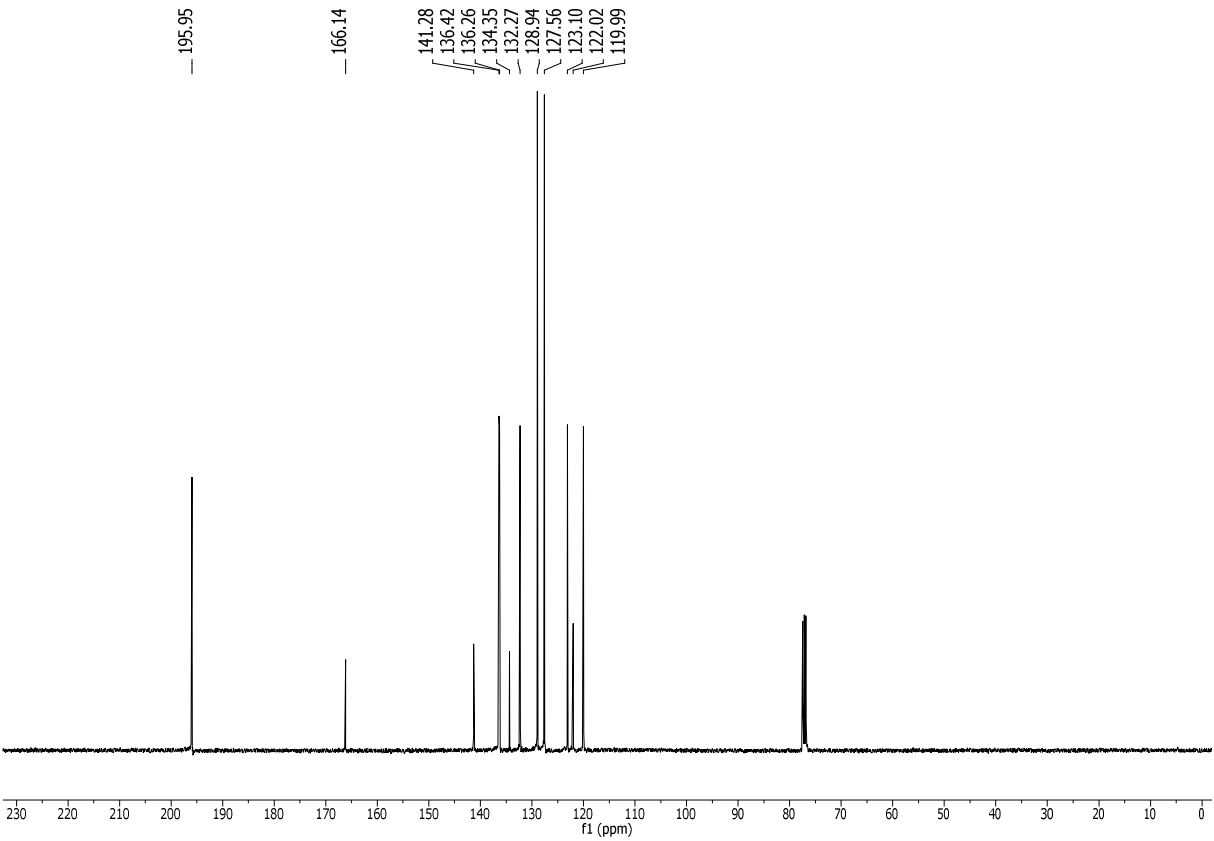

S51

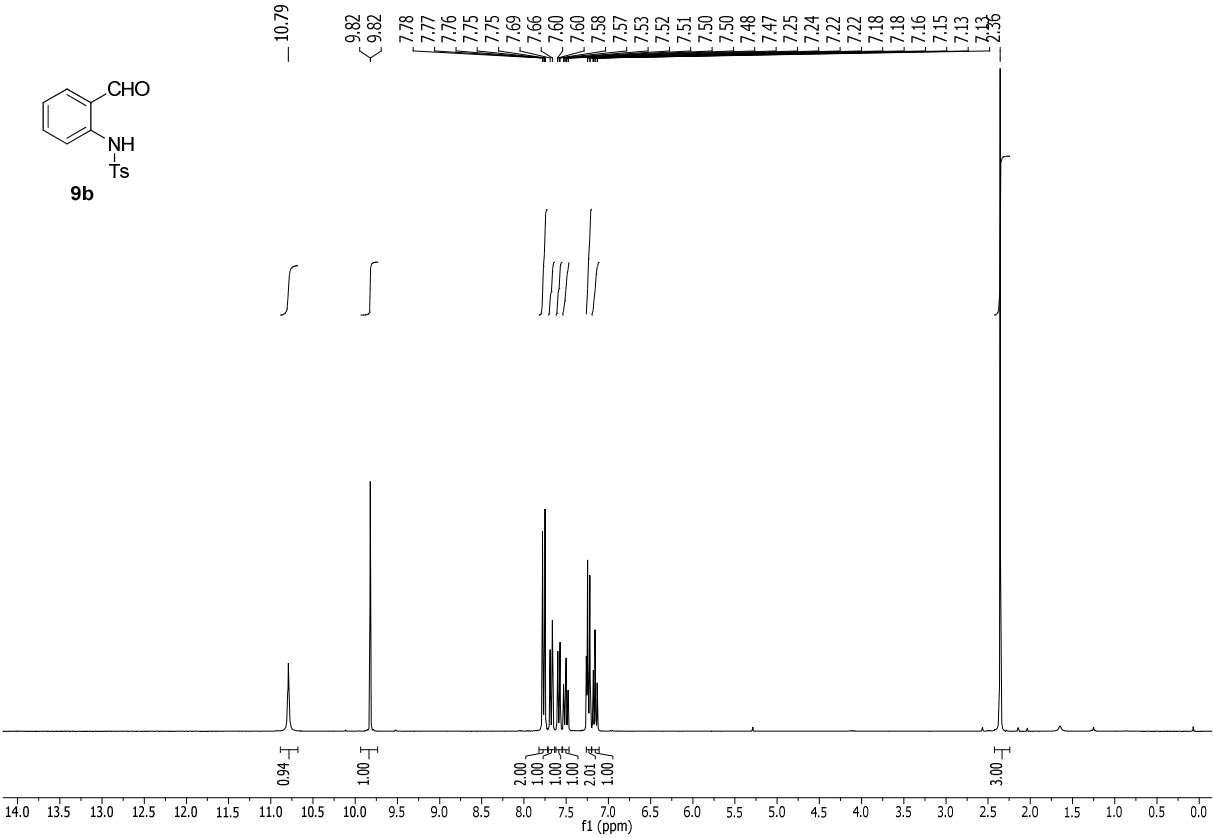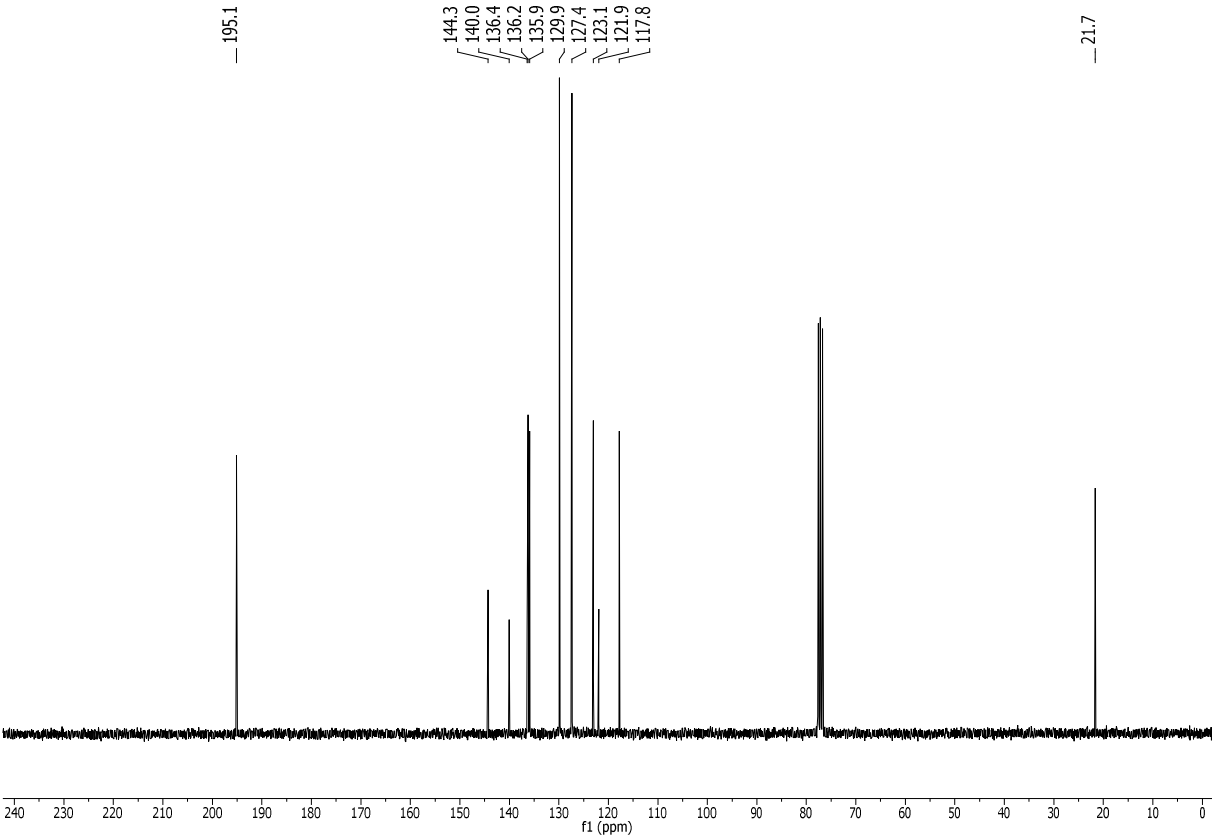

S52

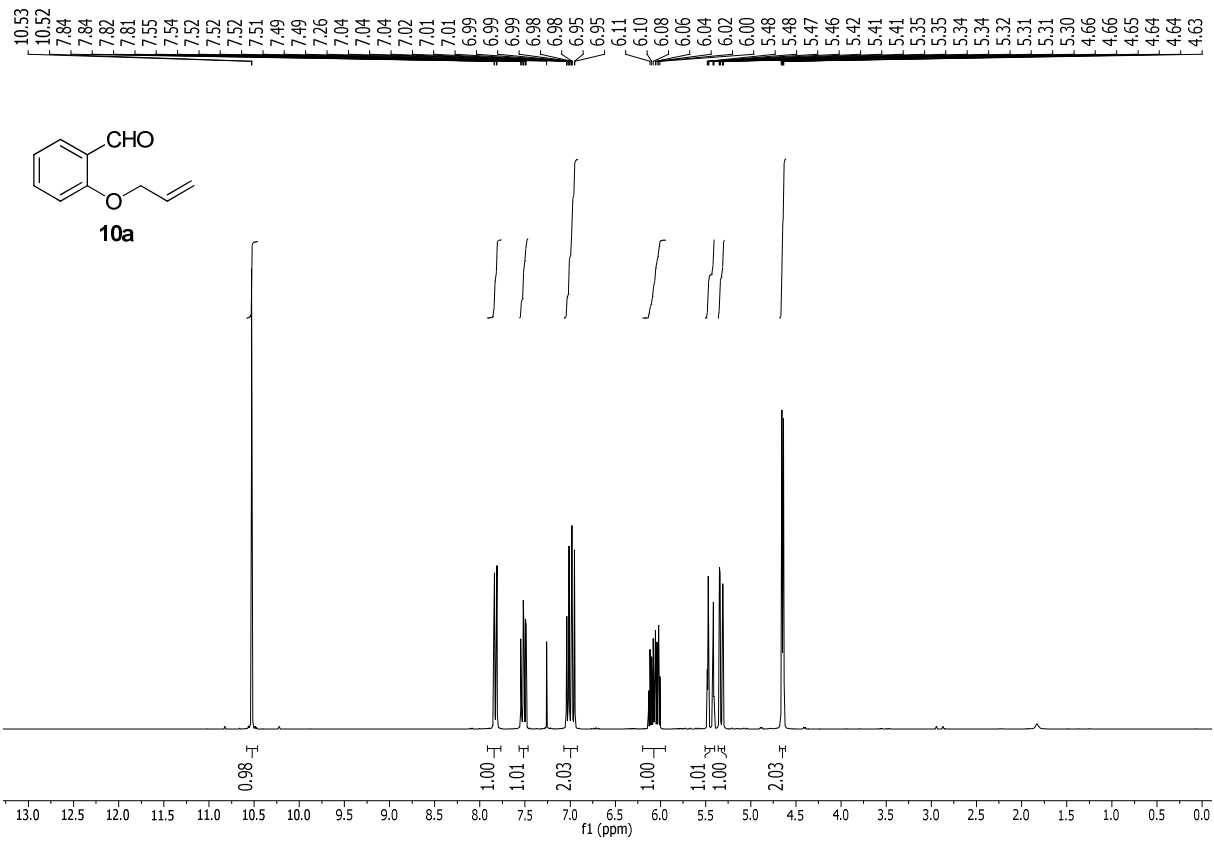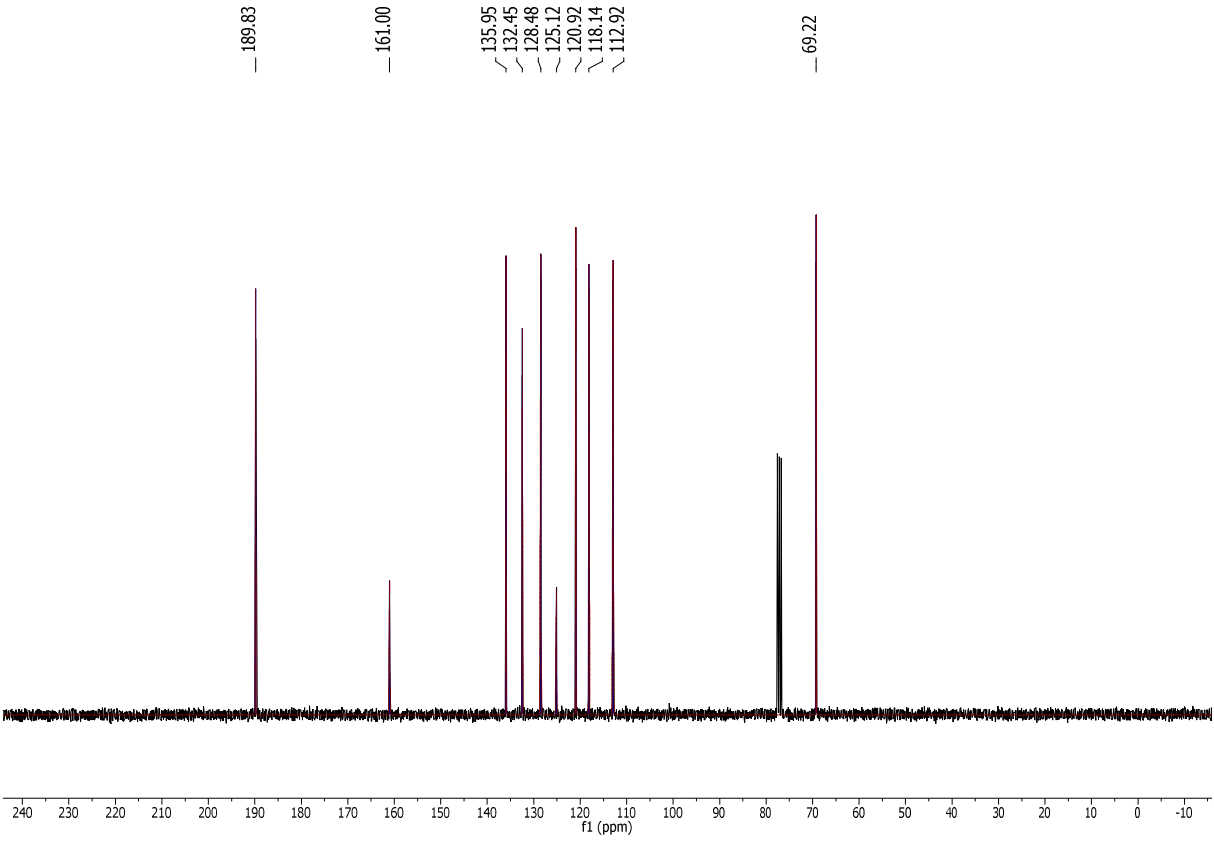

S53

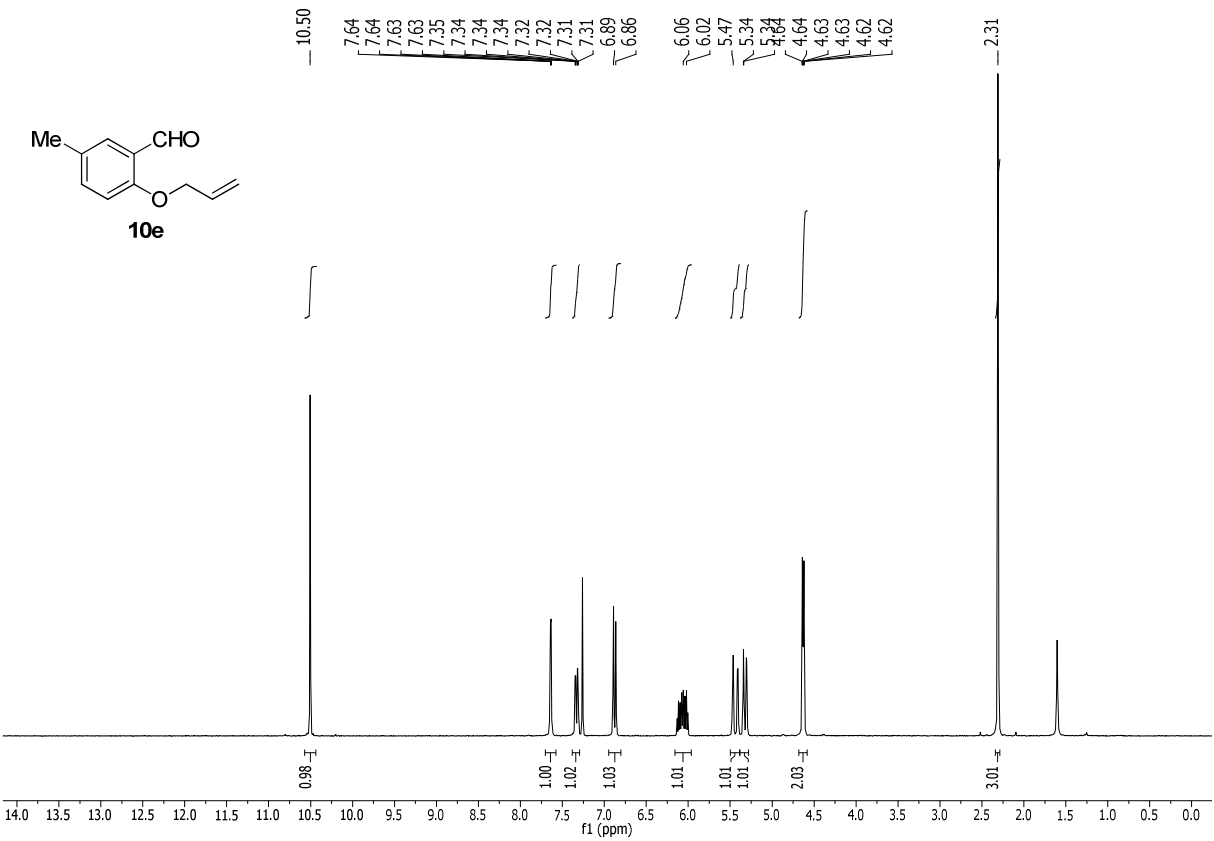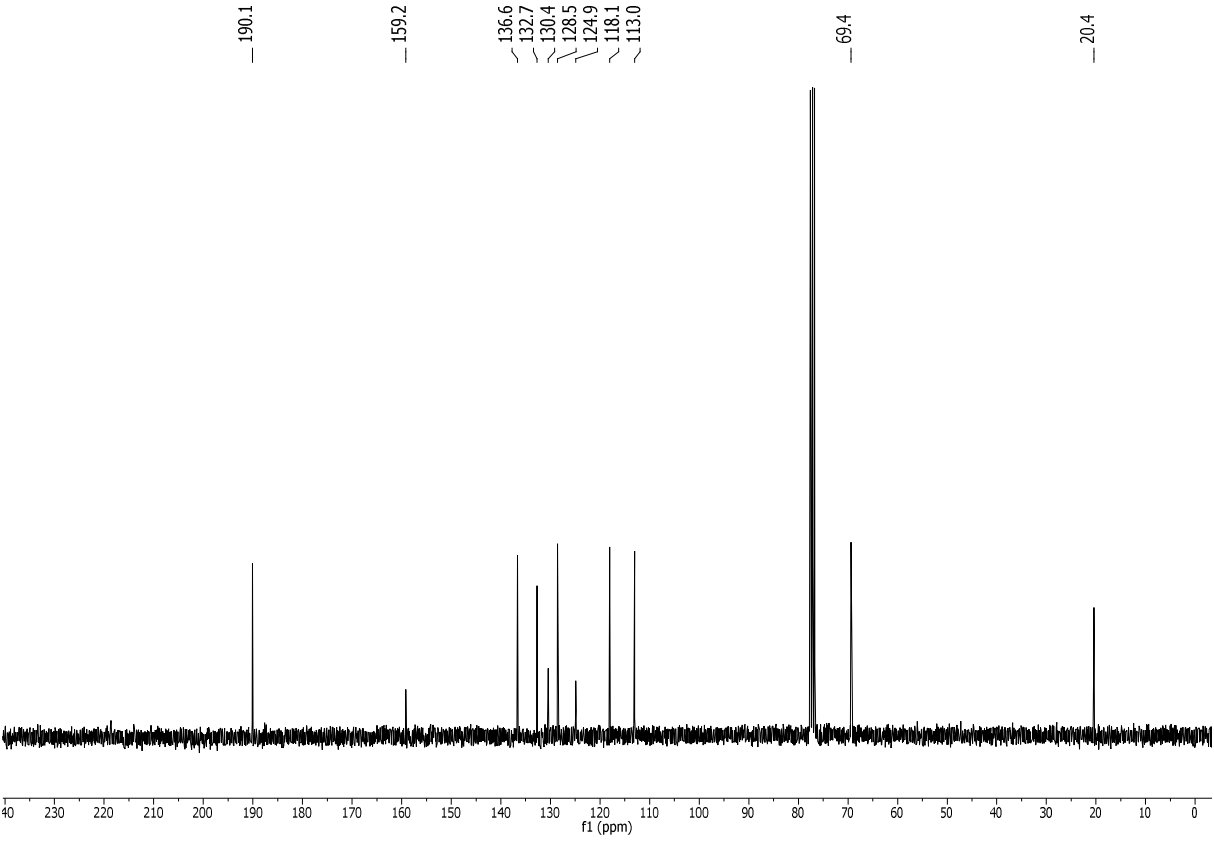



S54

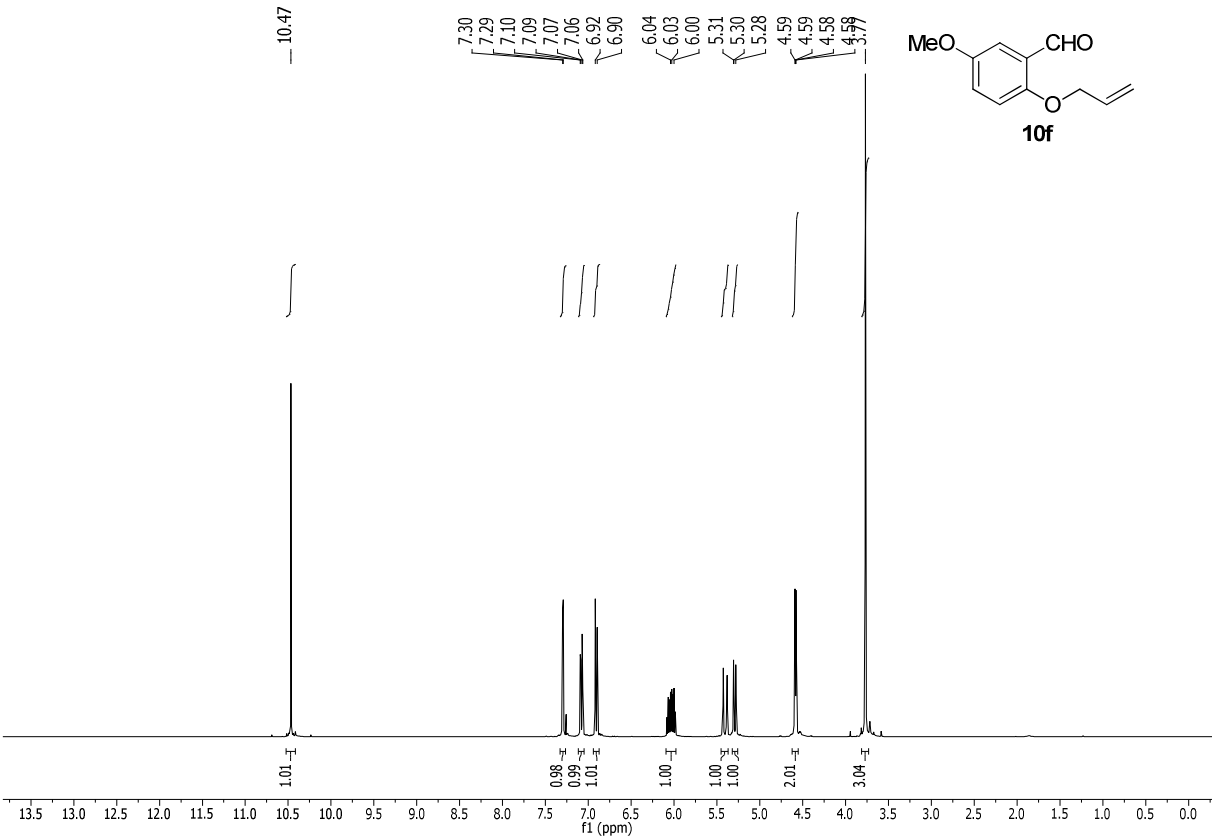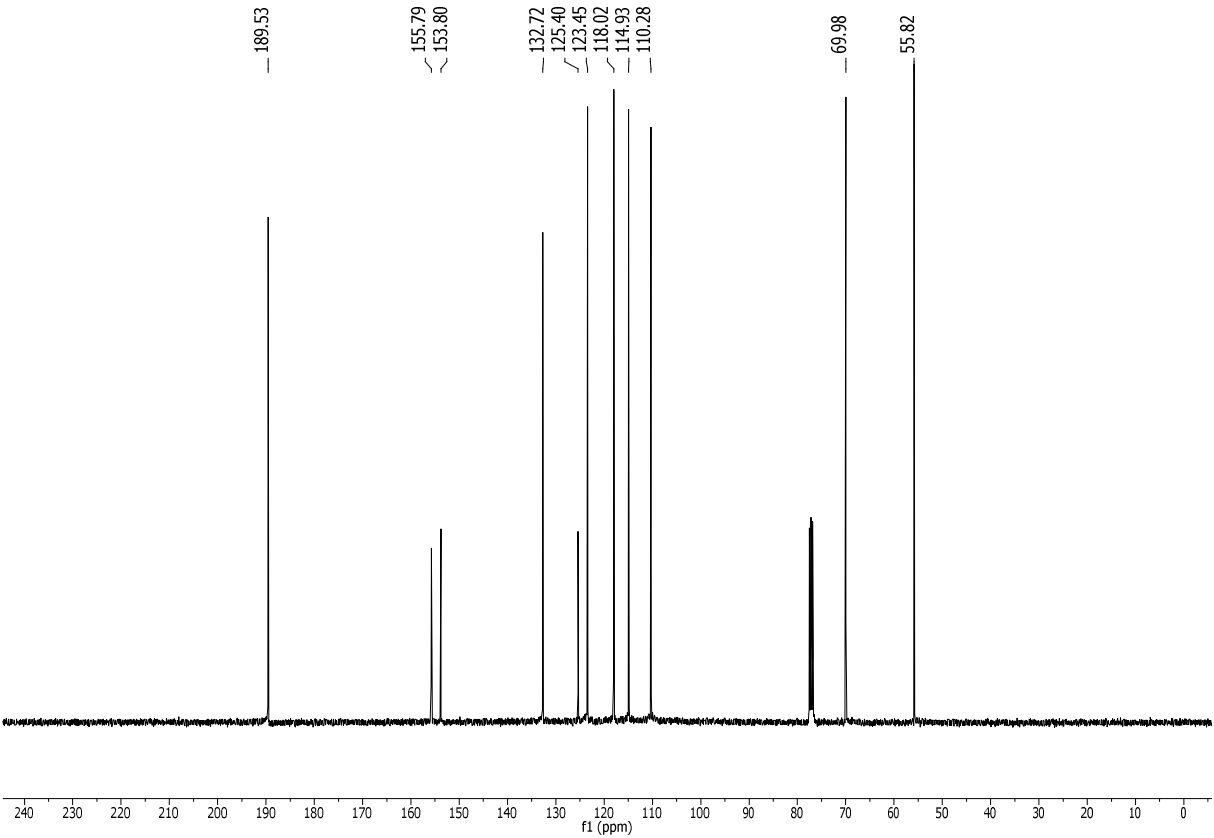

S55

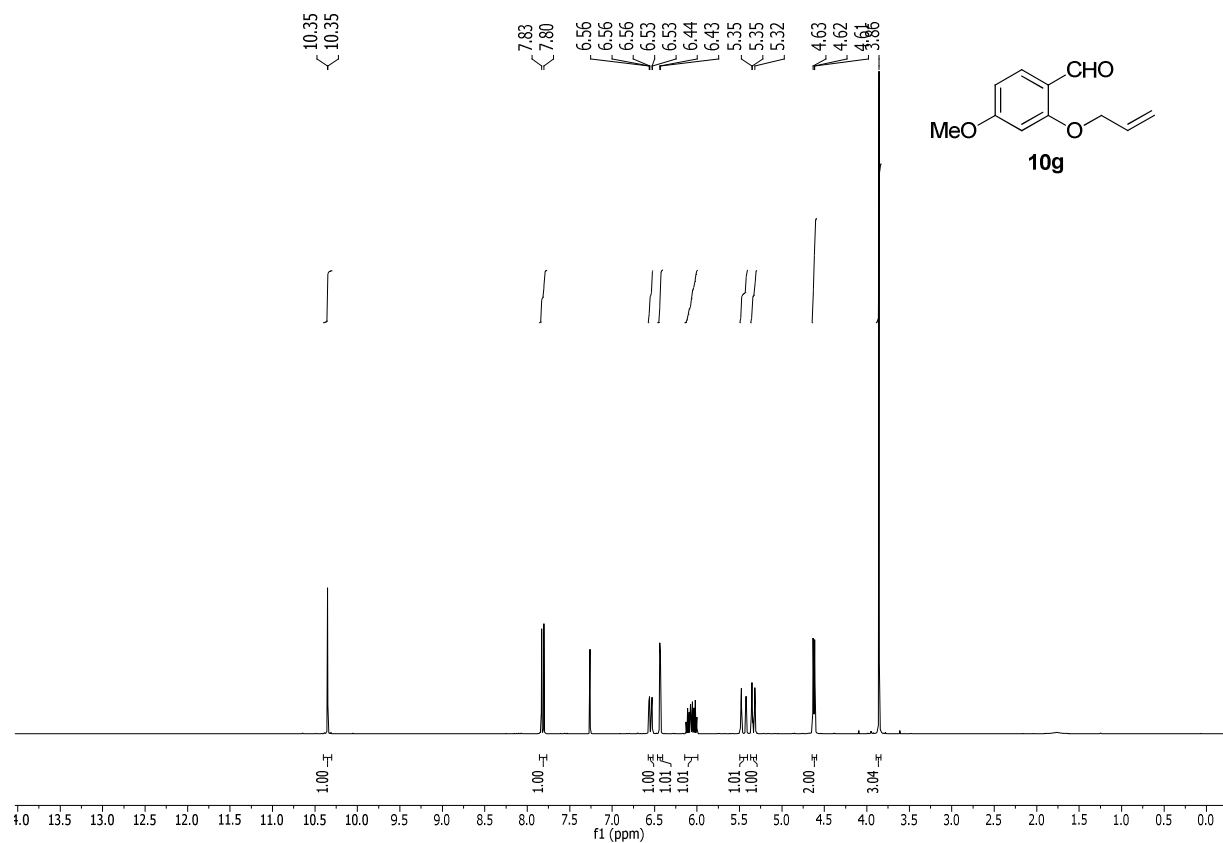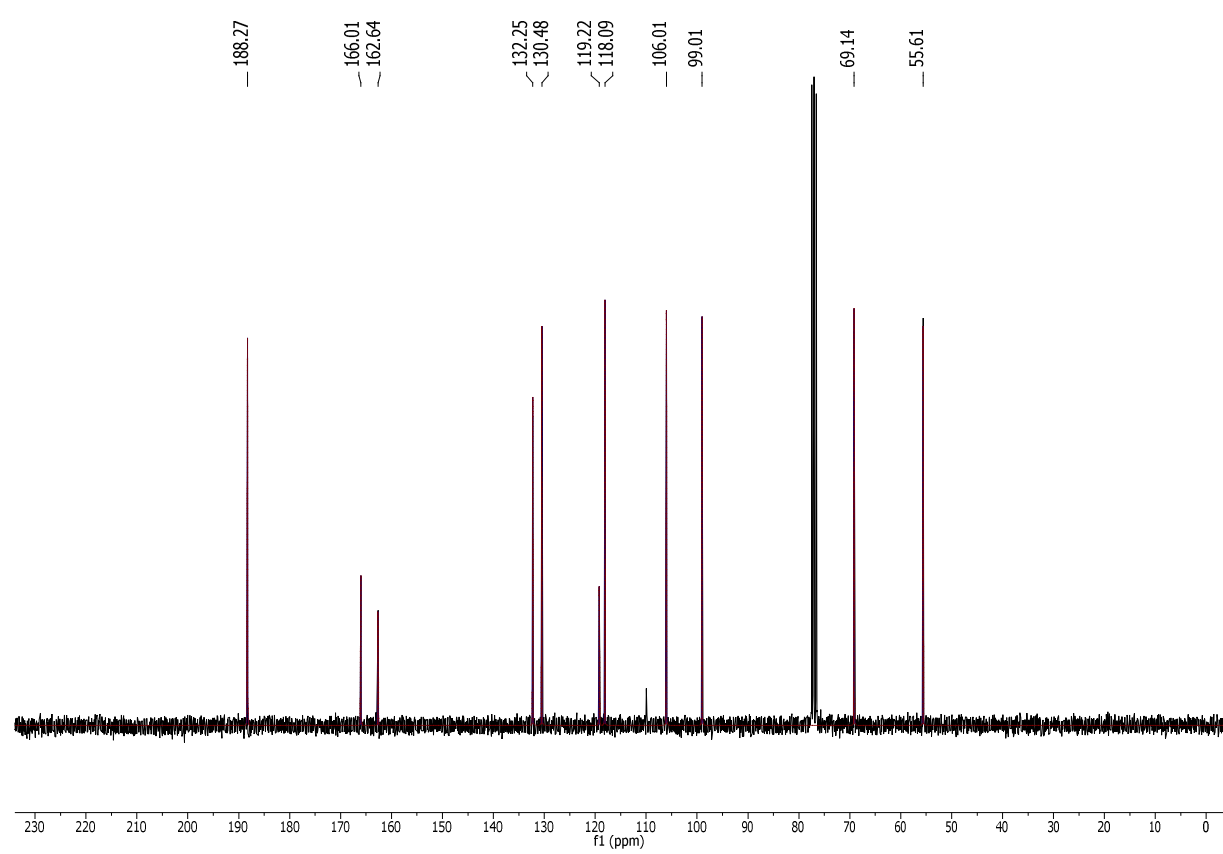

S56

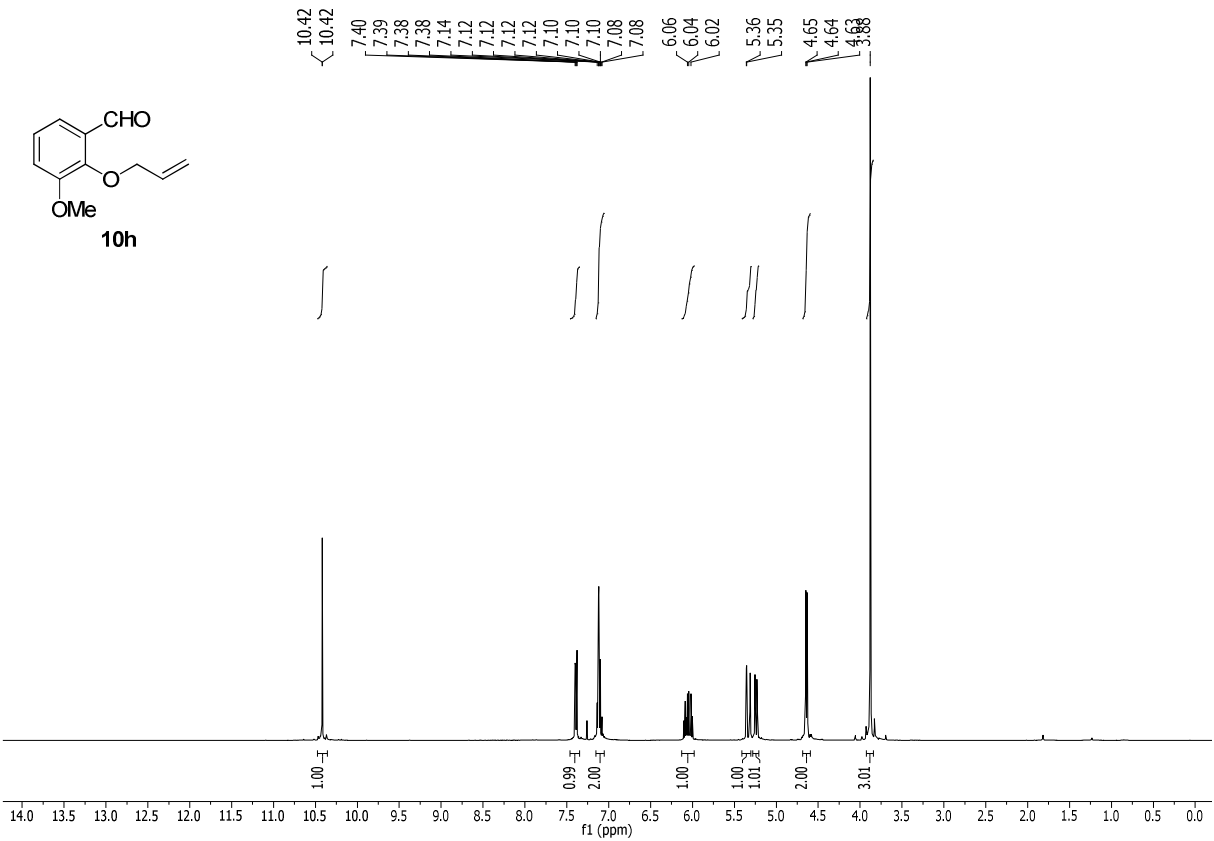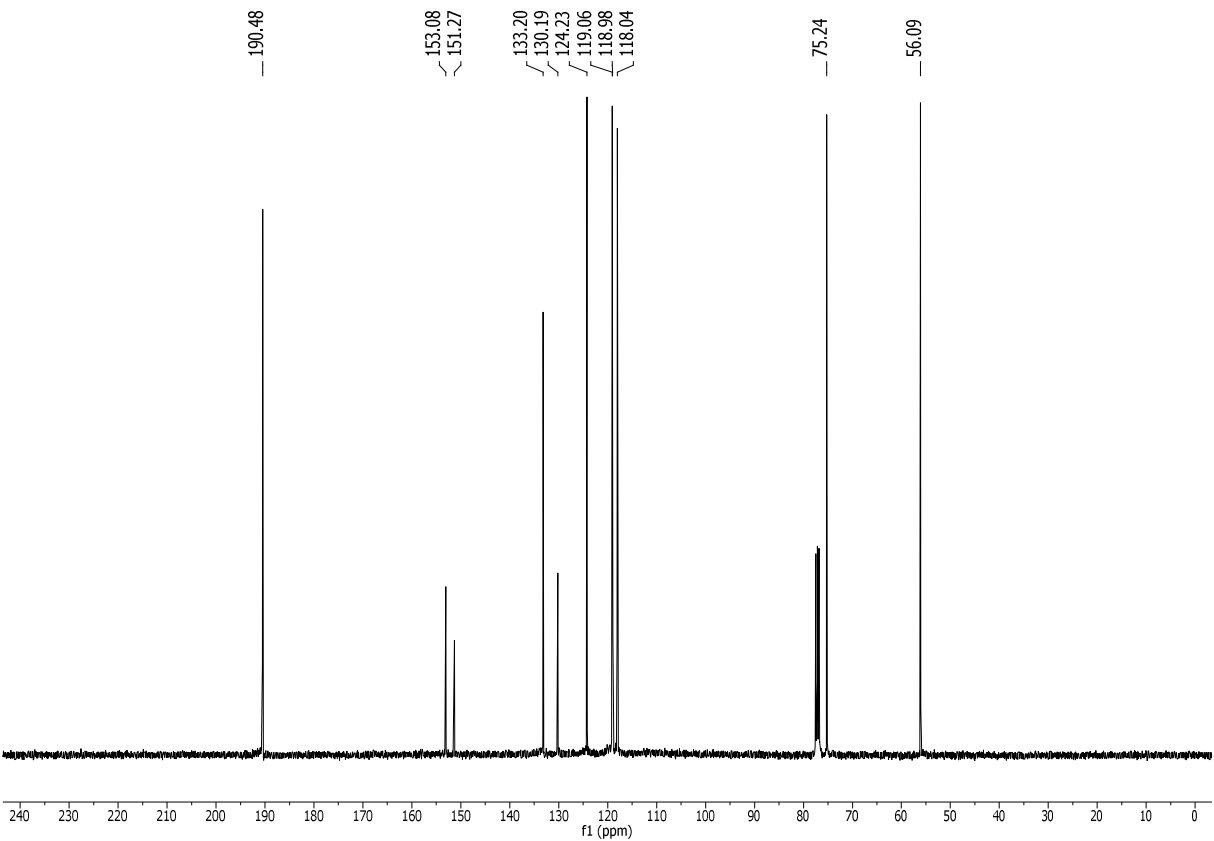

S57

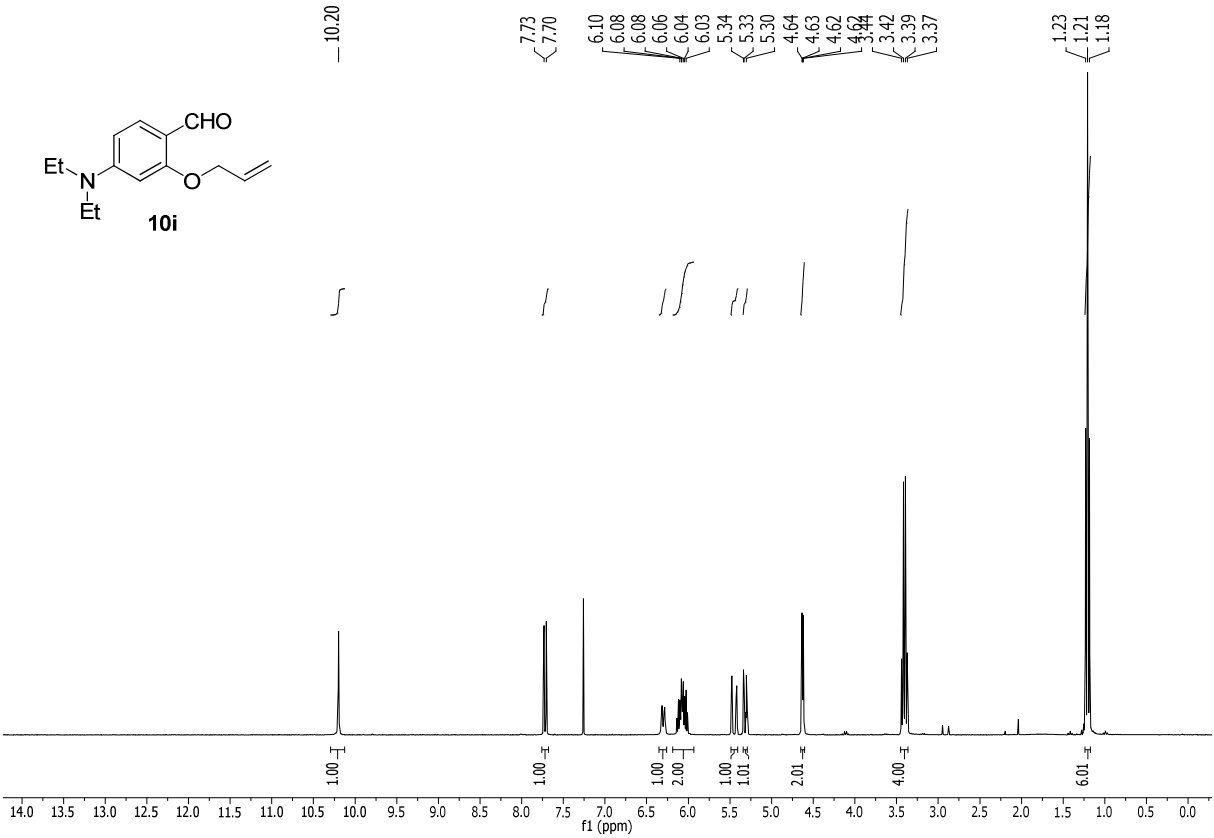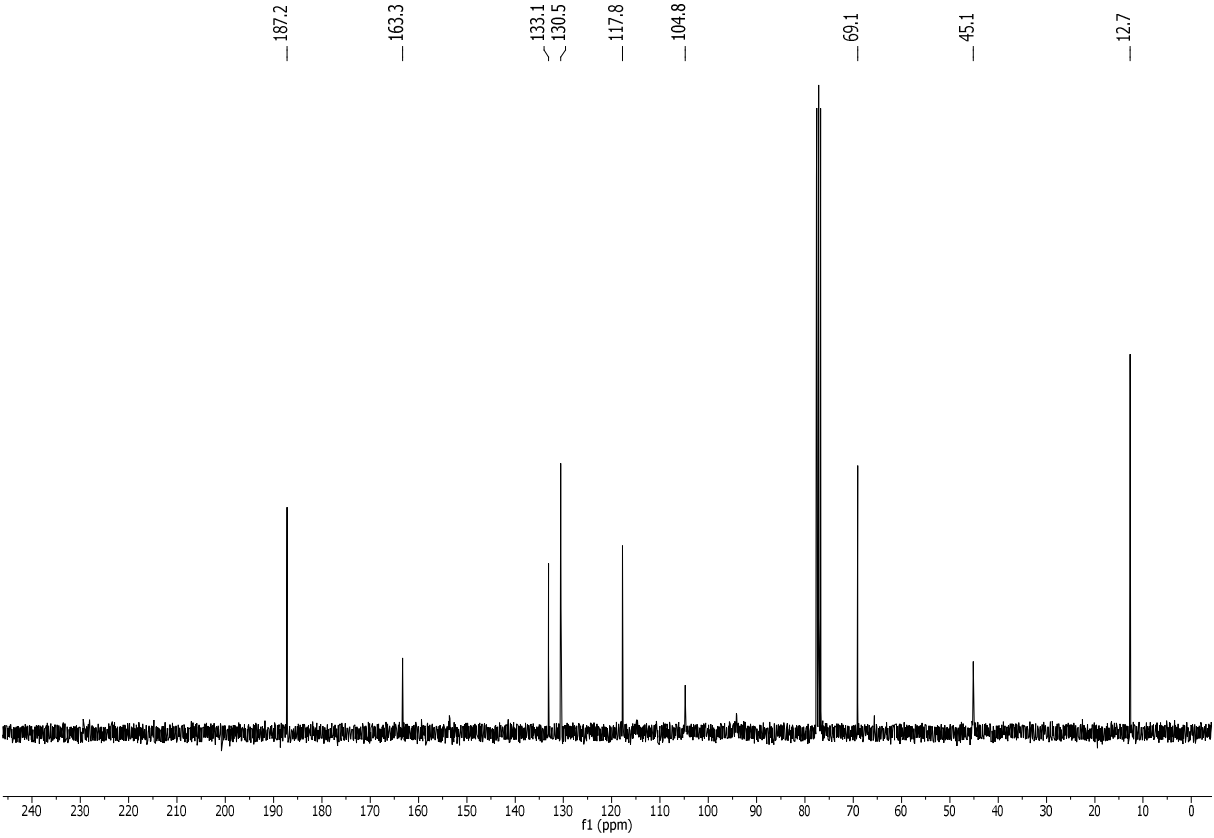

S58

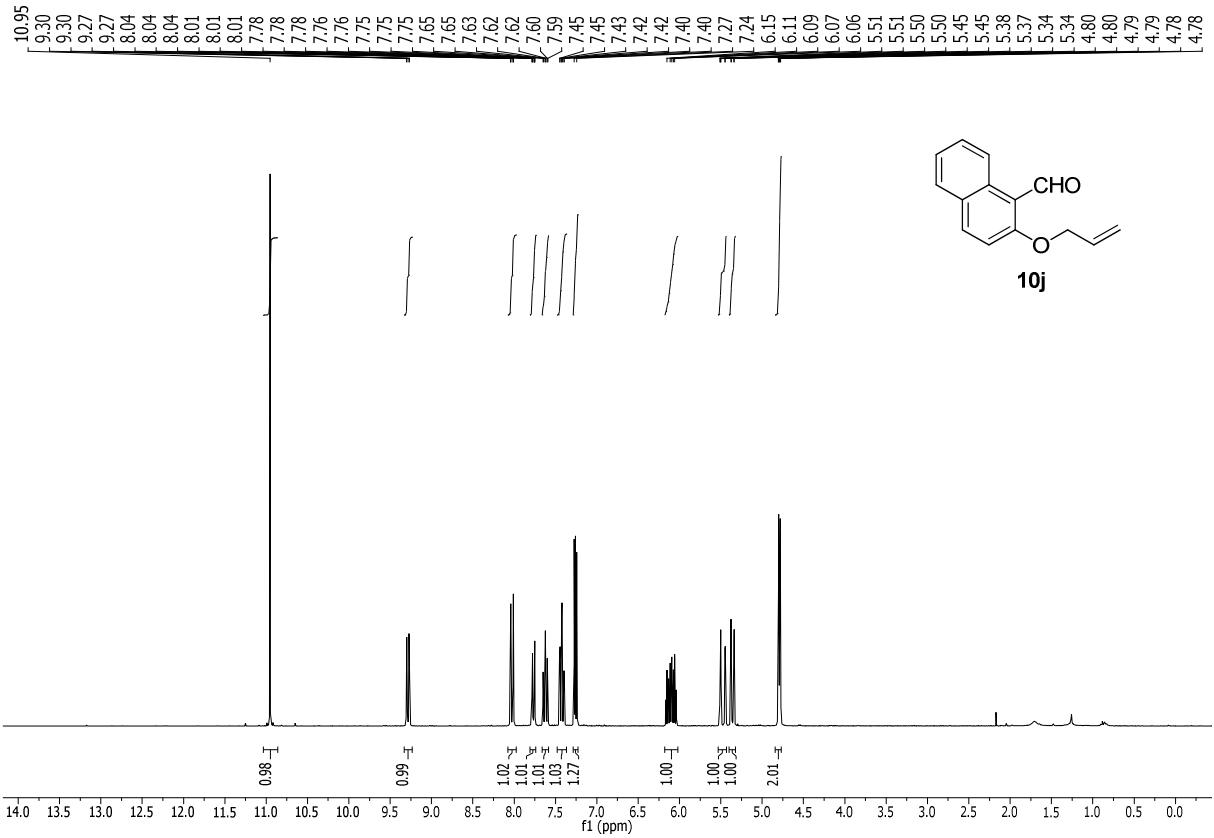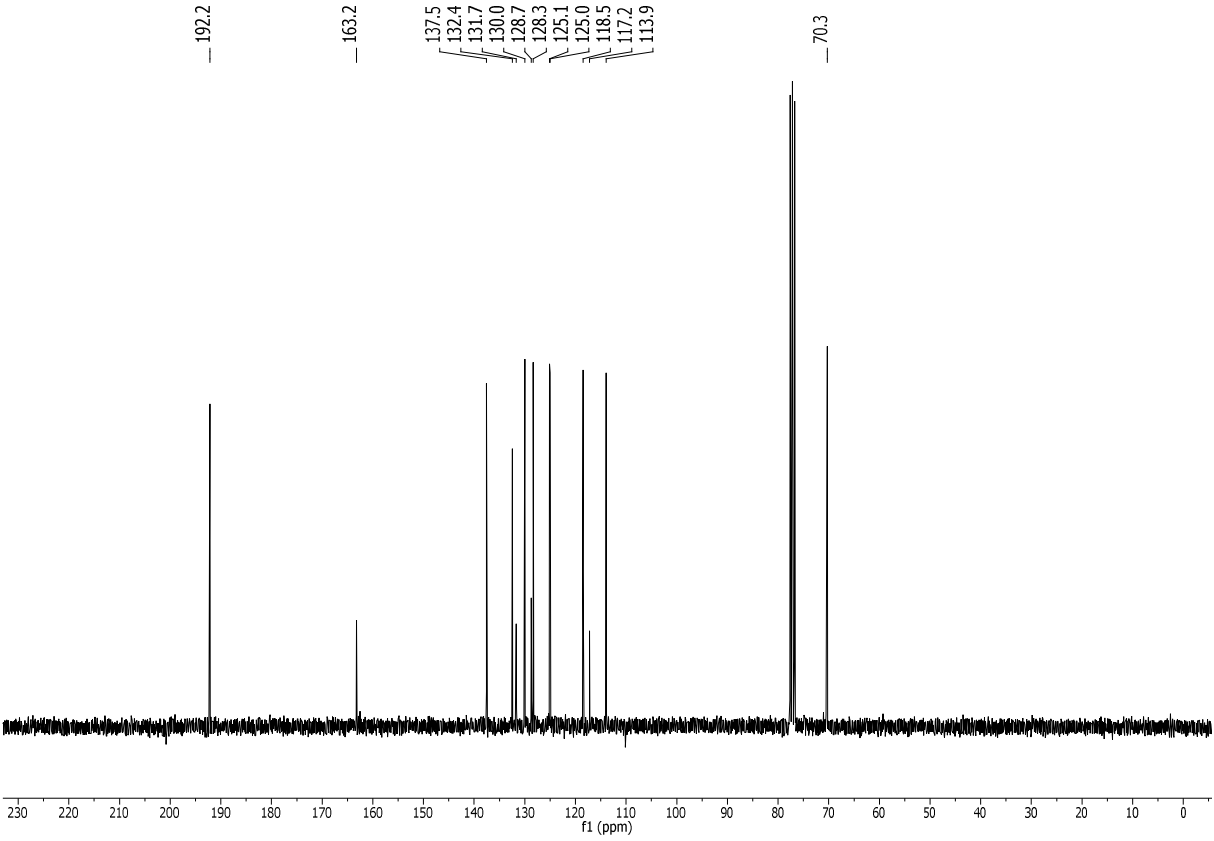

S59

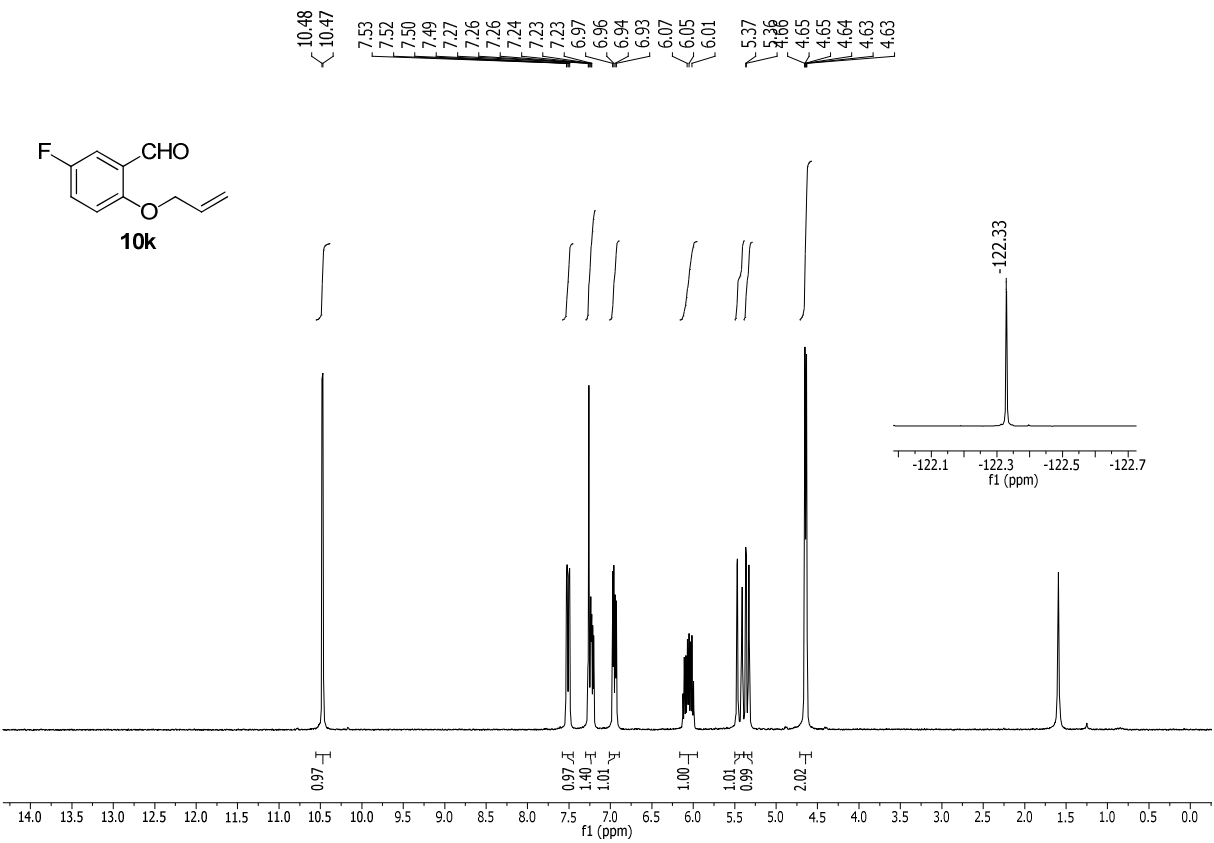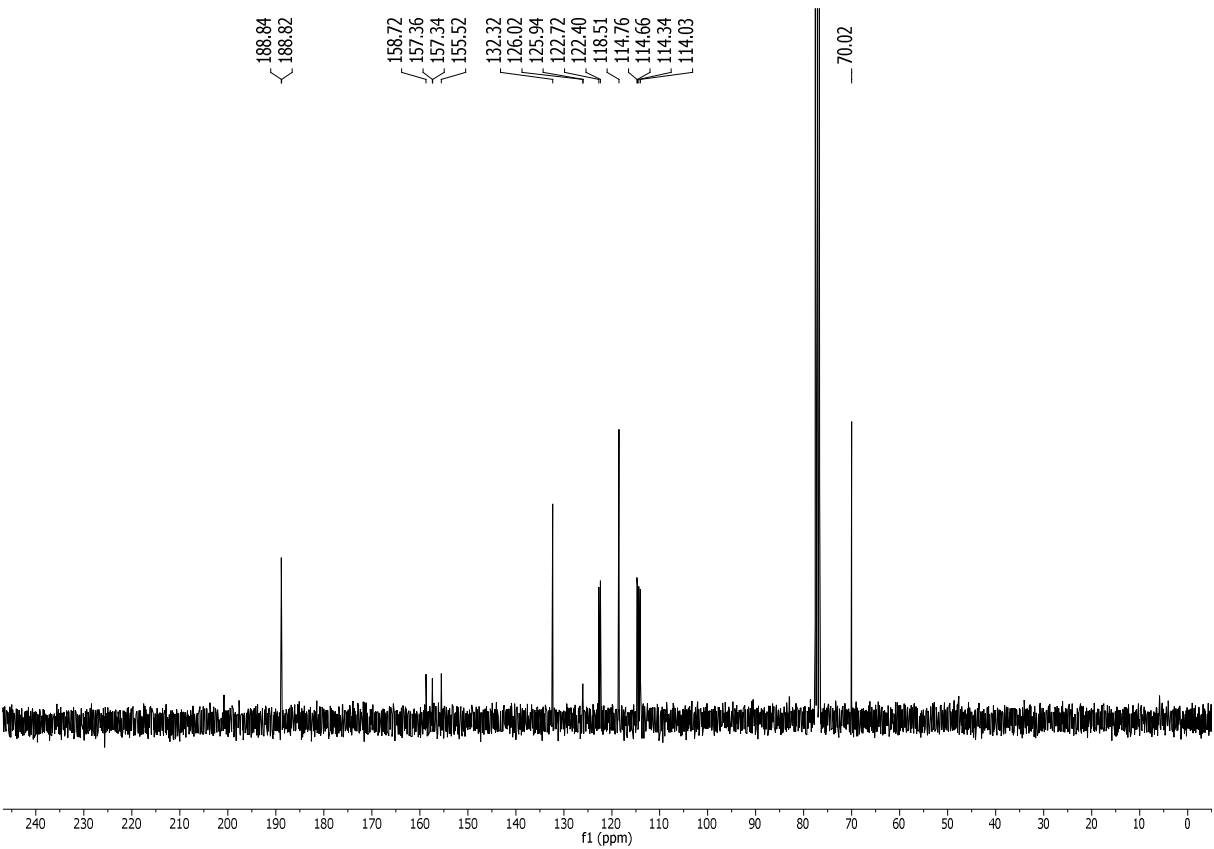

S60

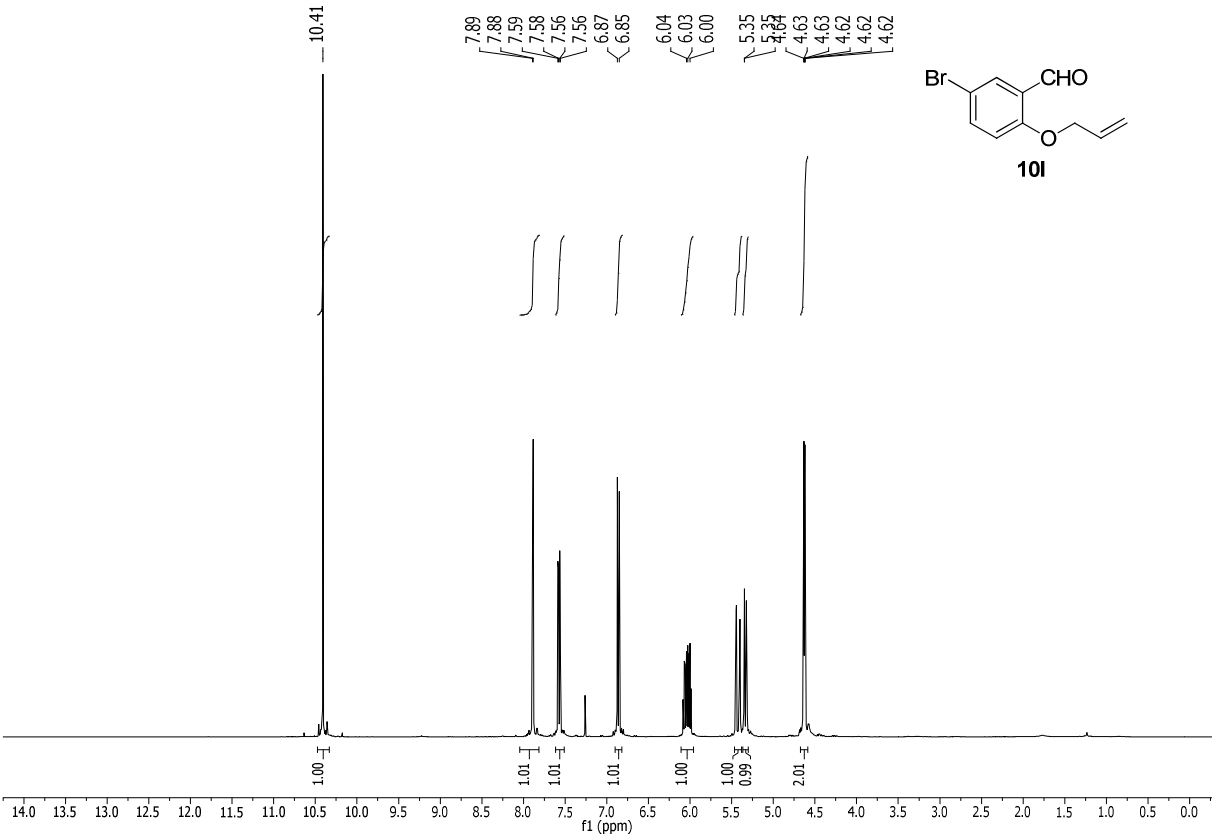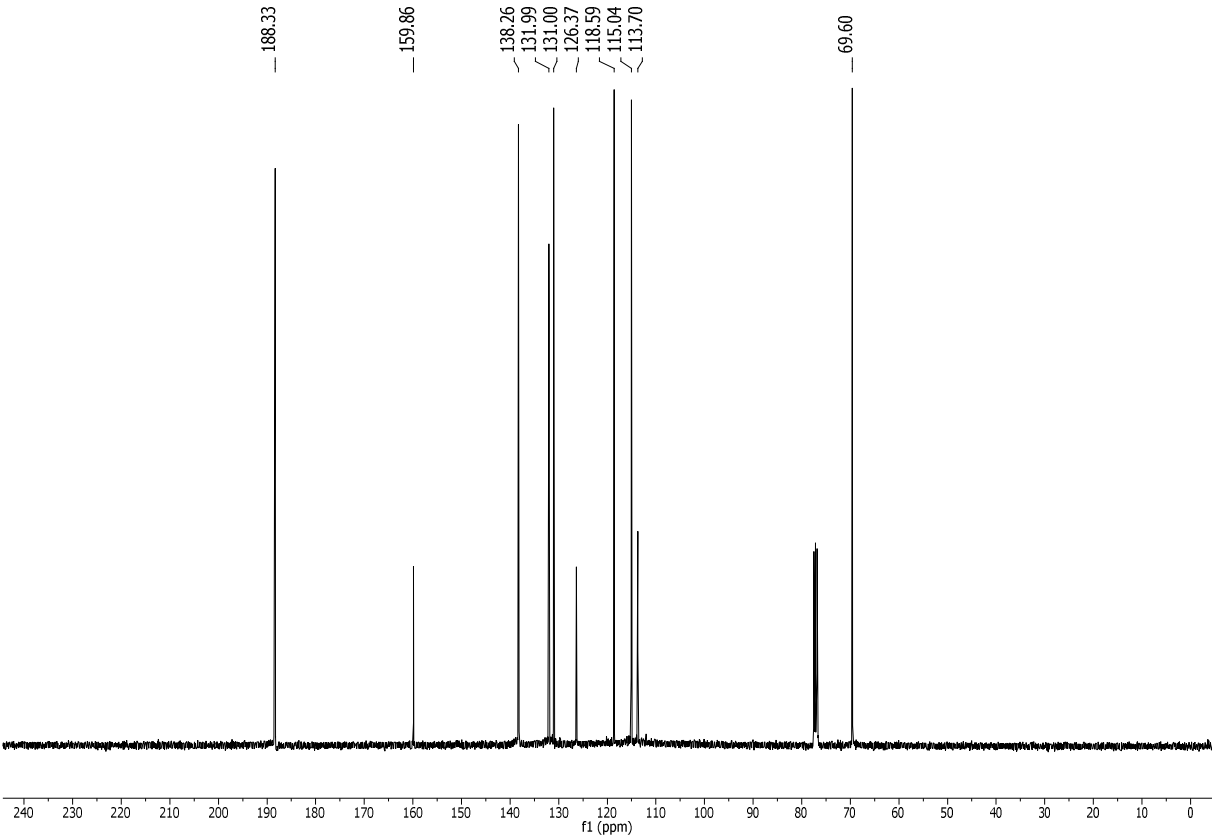



S61

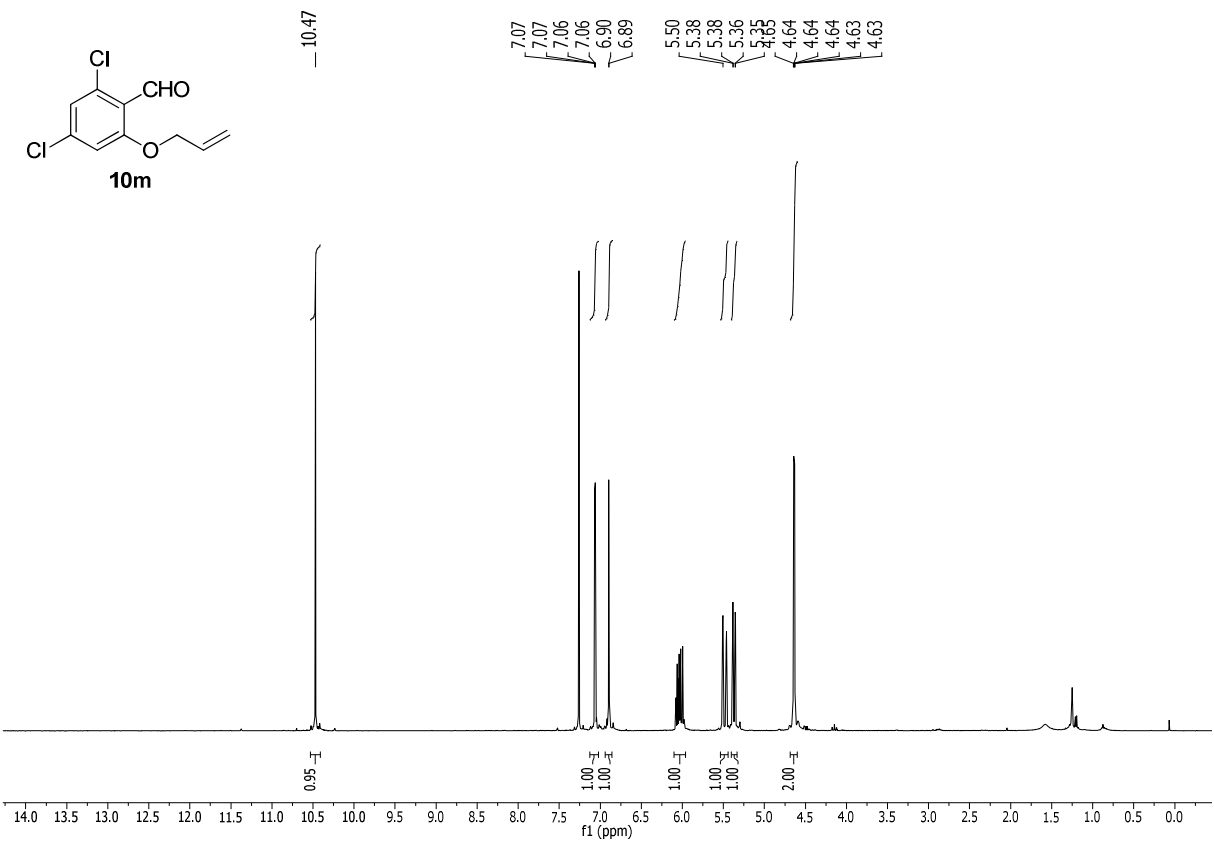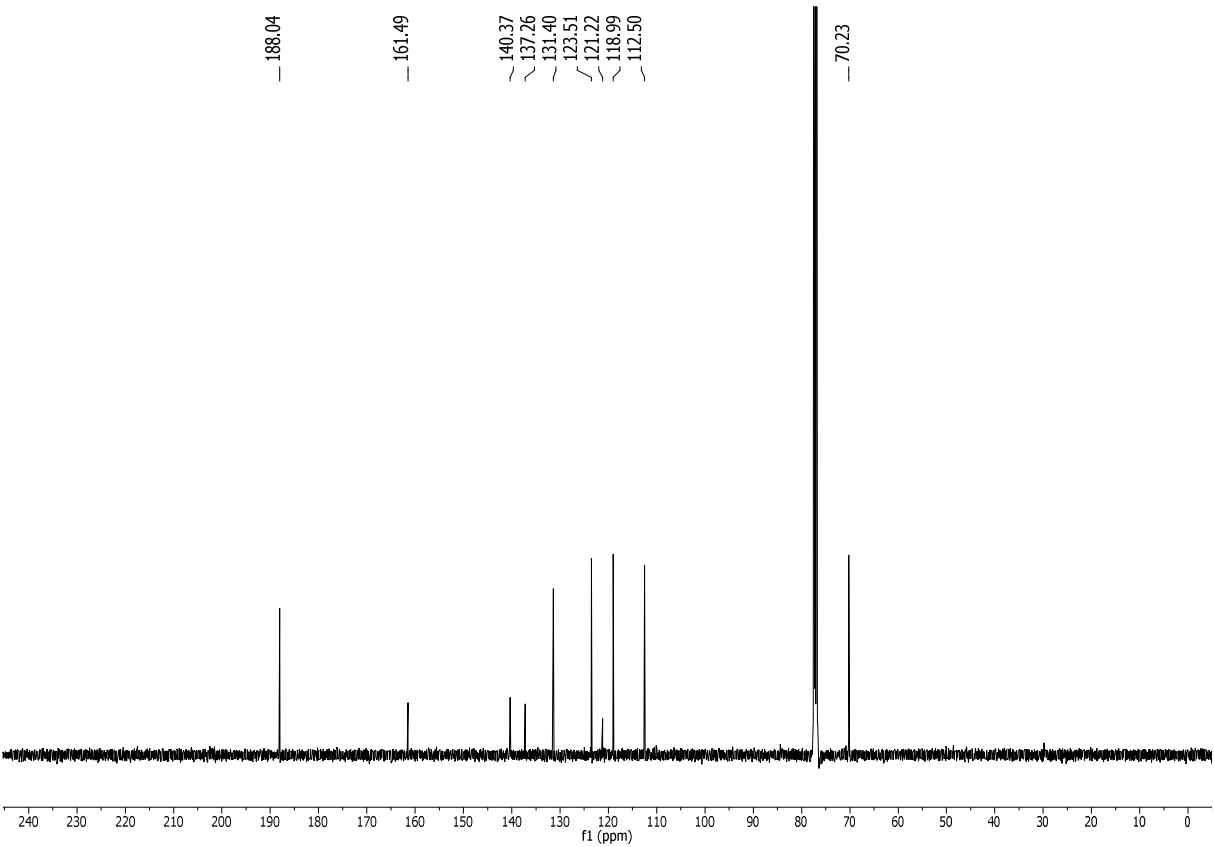

S62

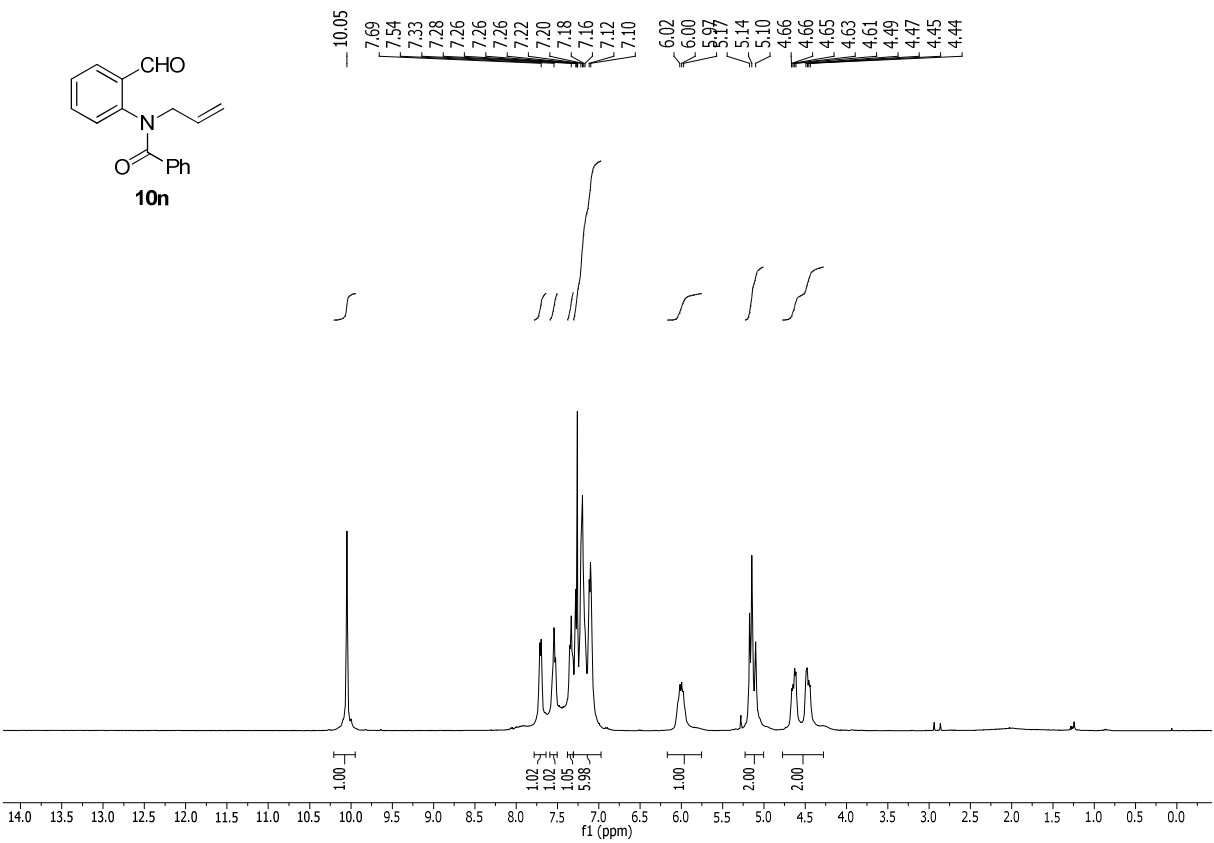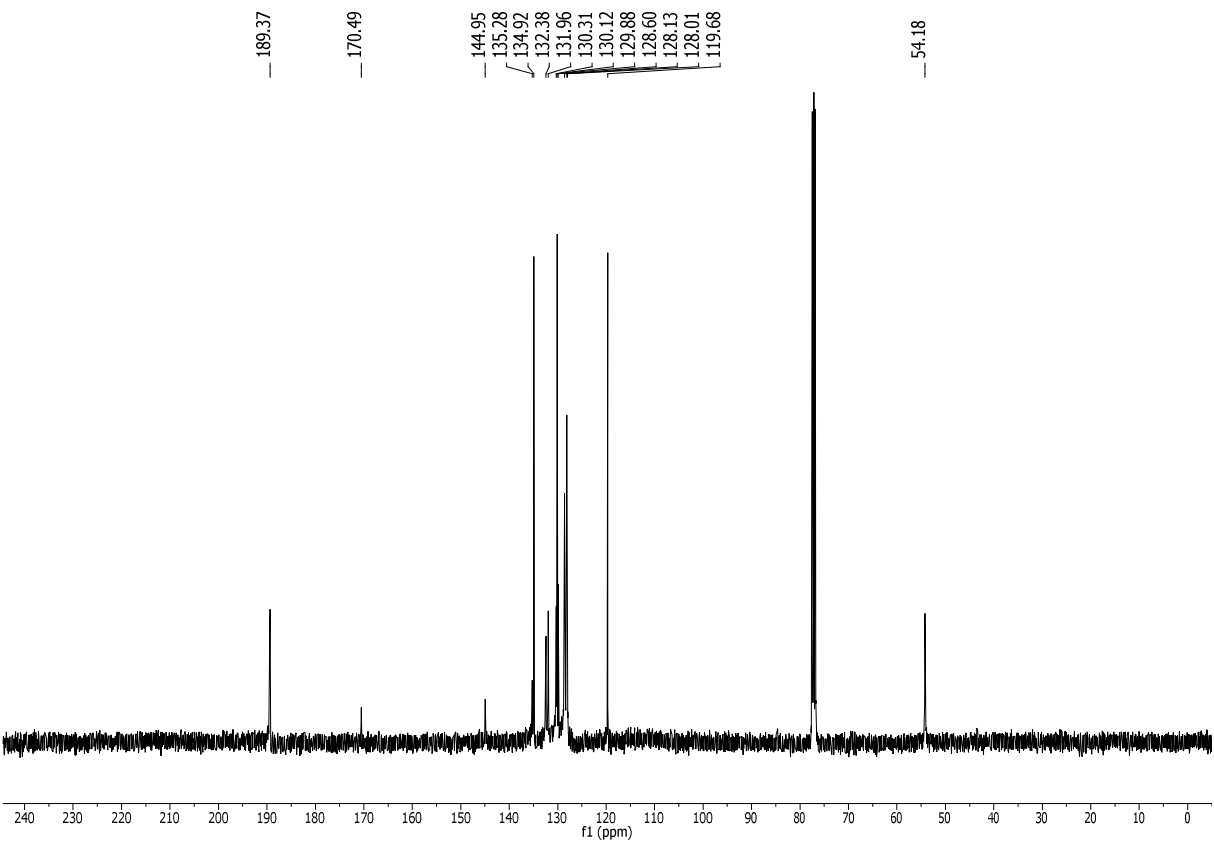

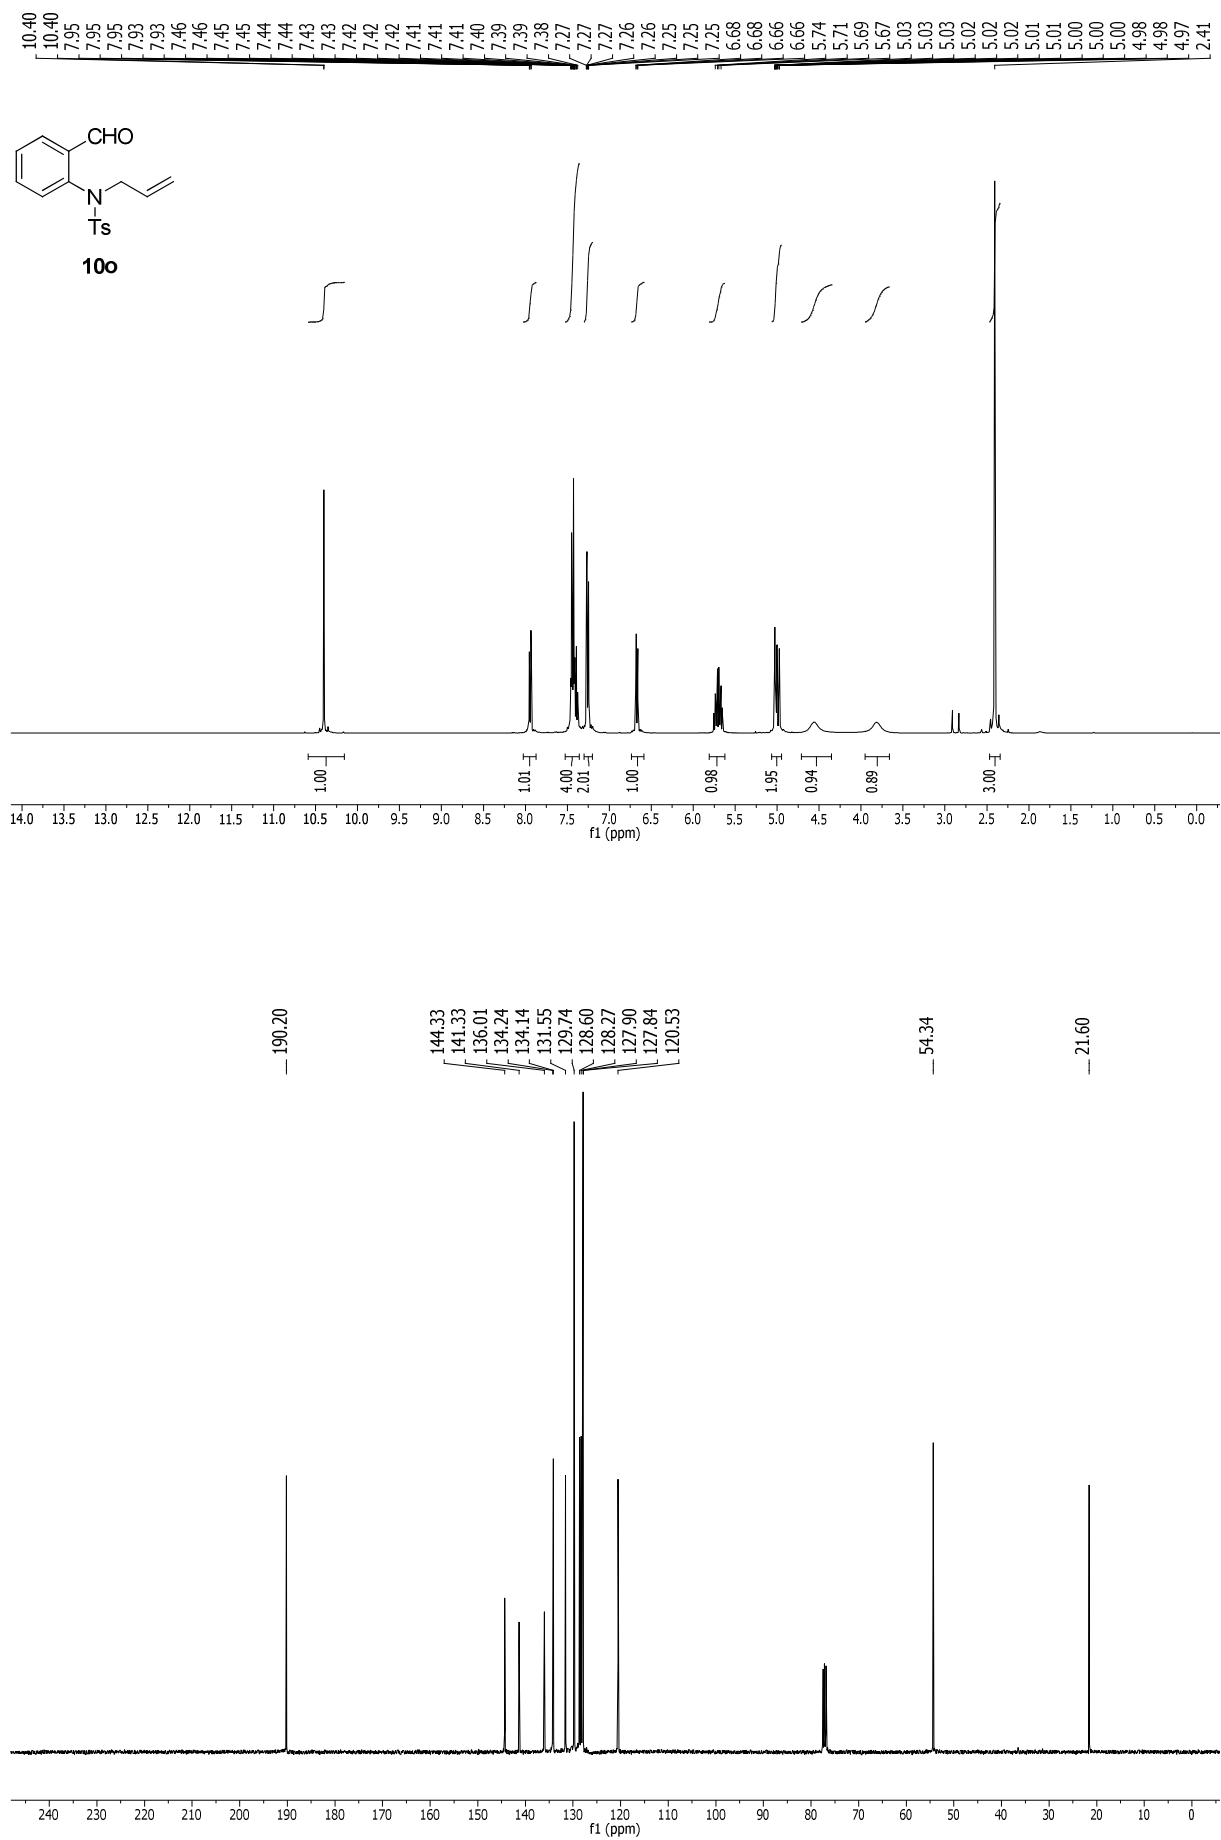

S64

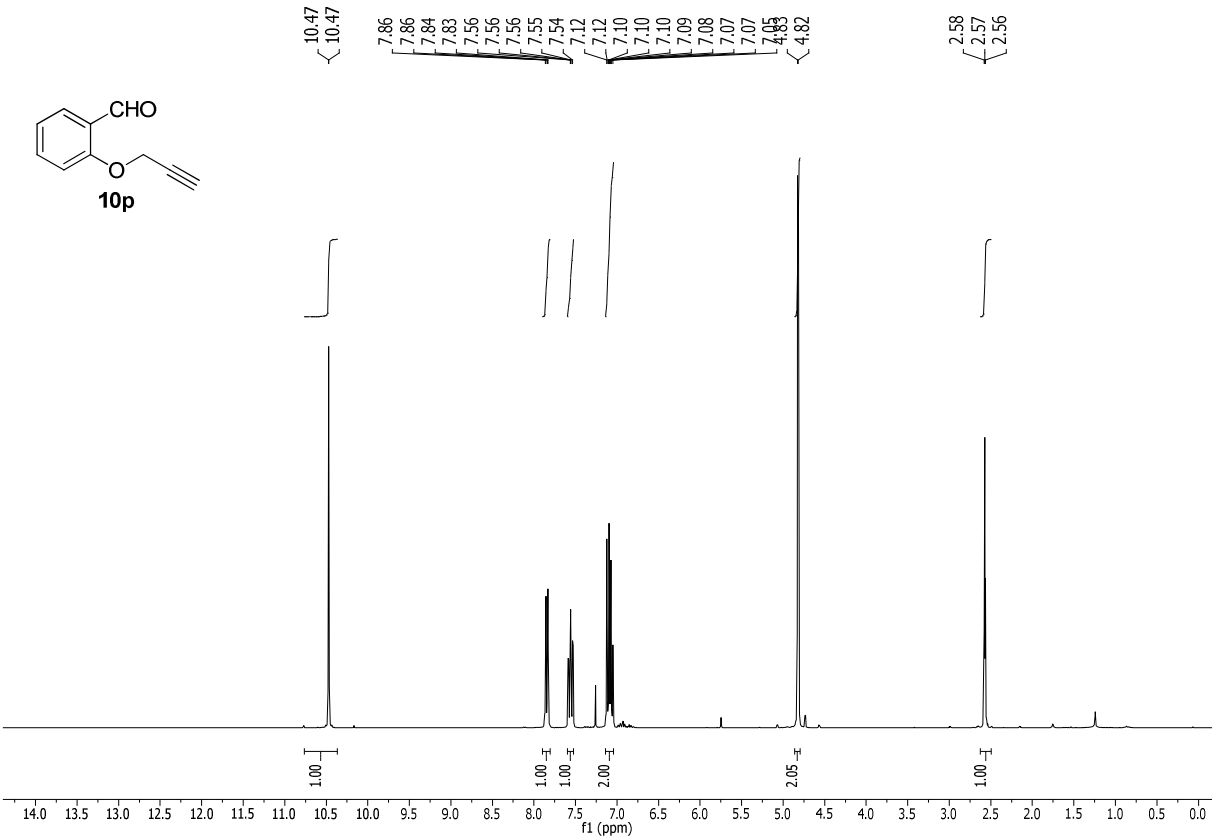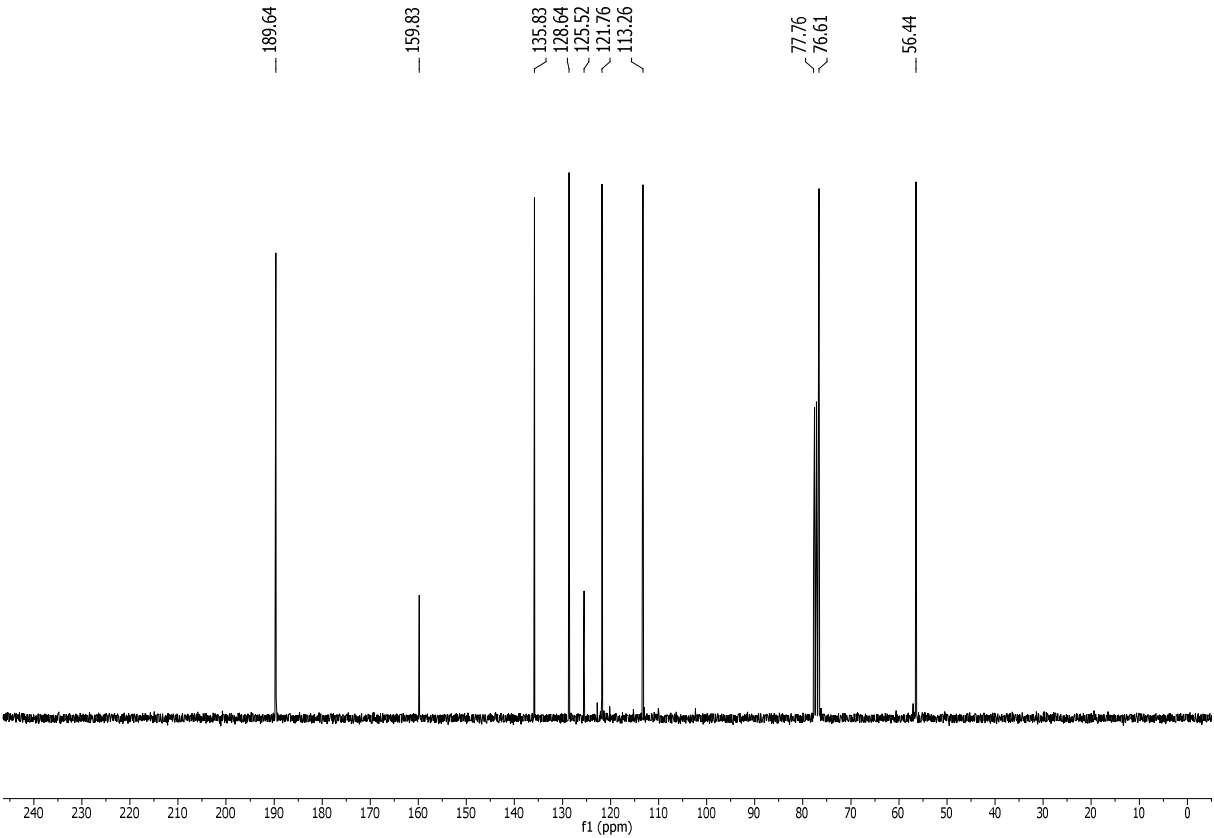

S65

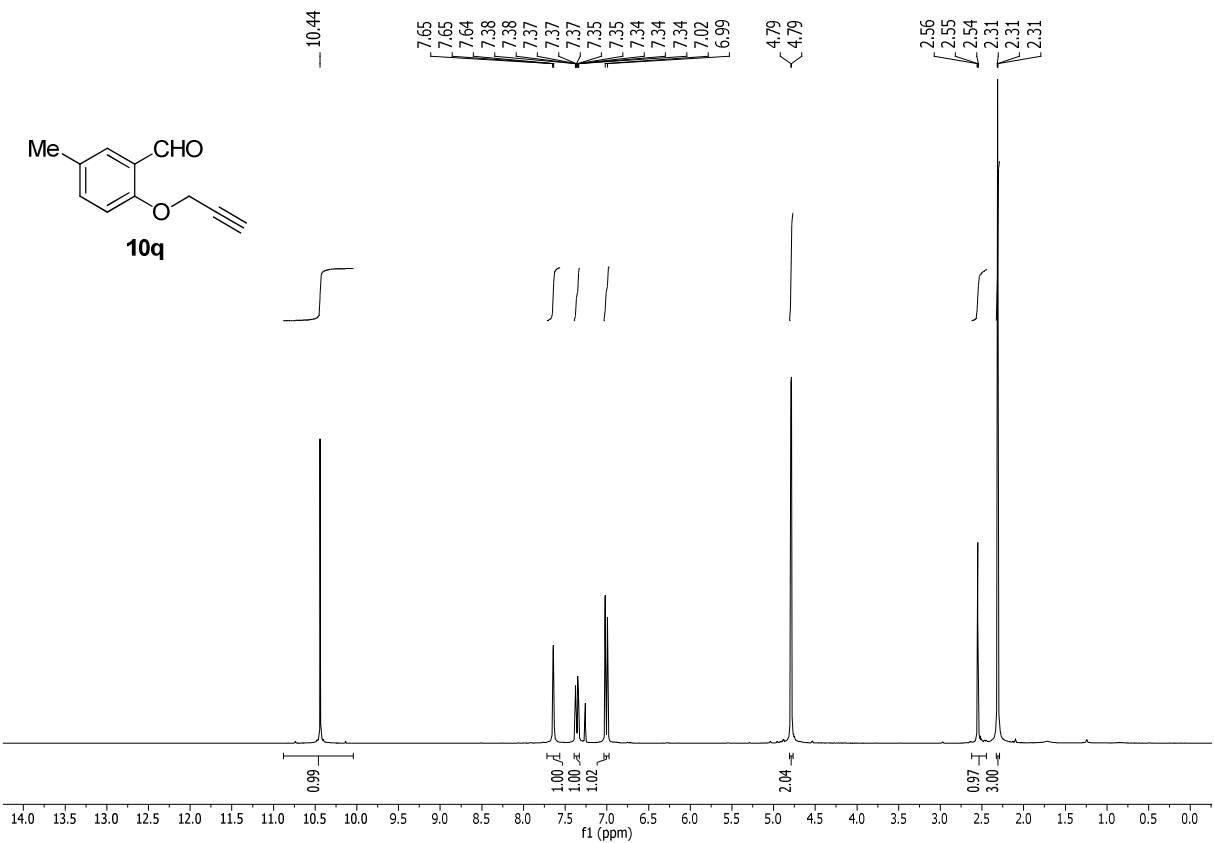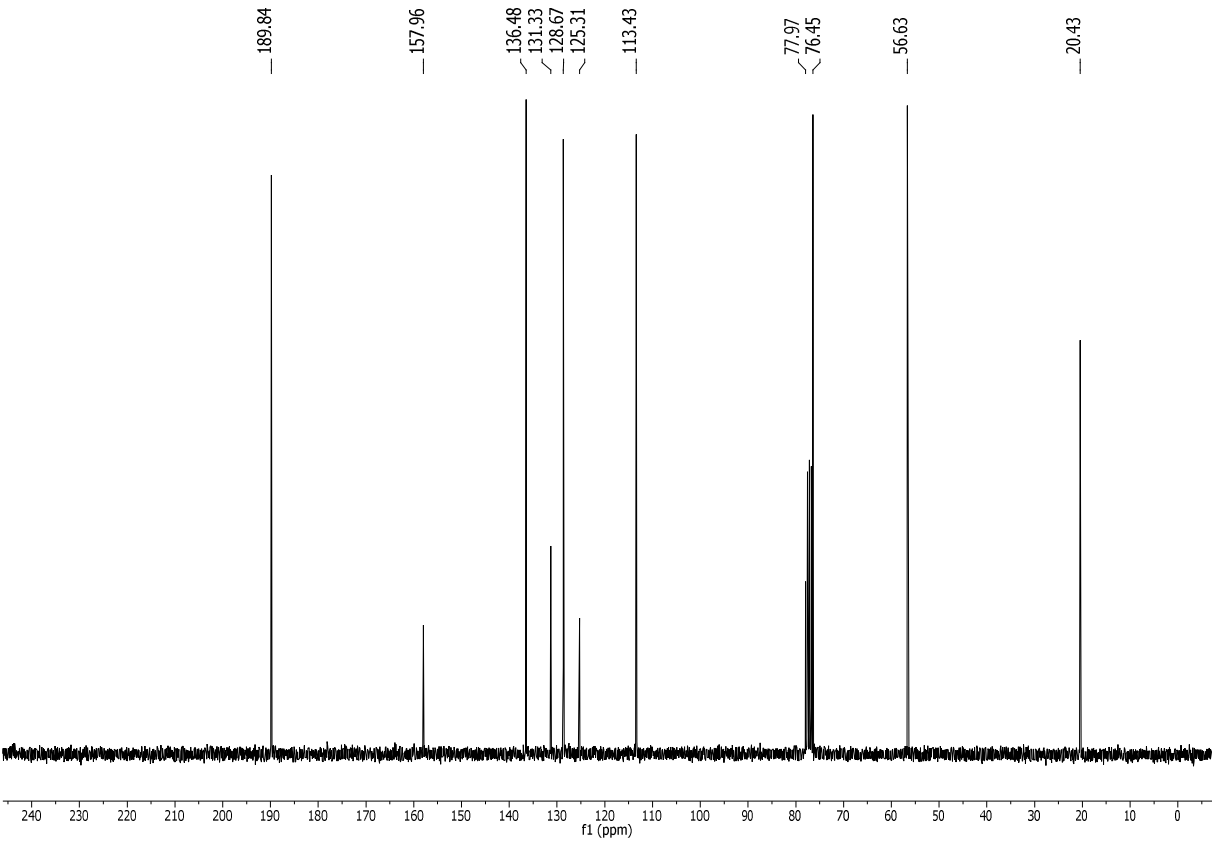

S66

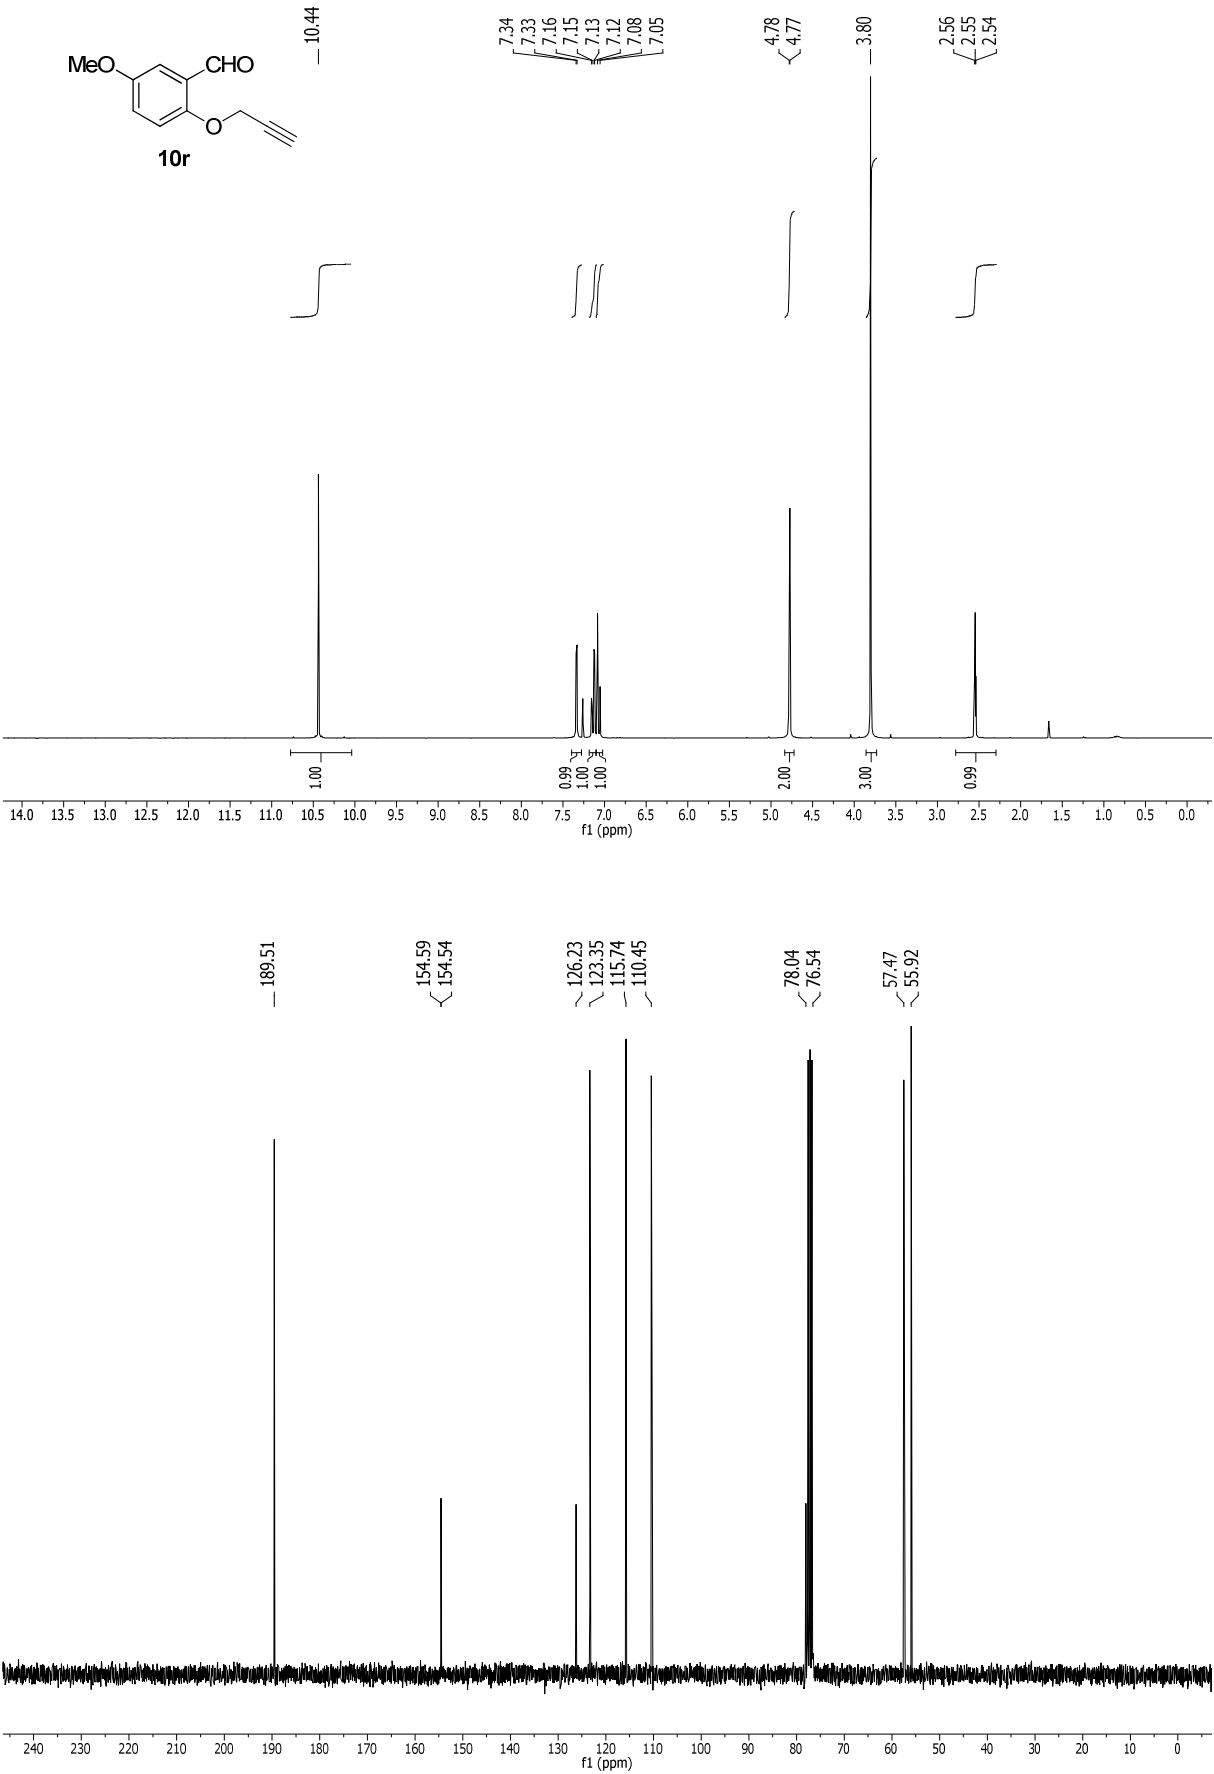

S67

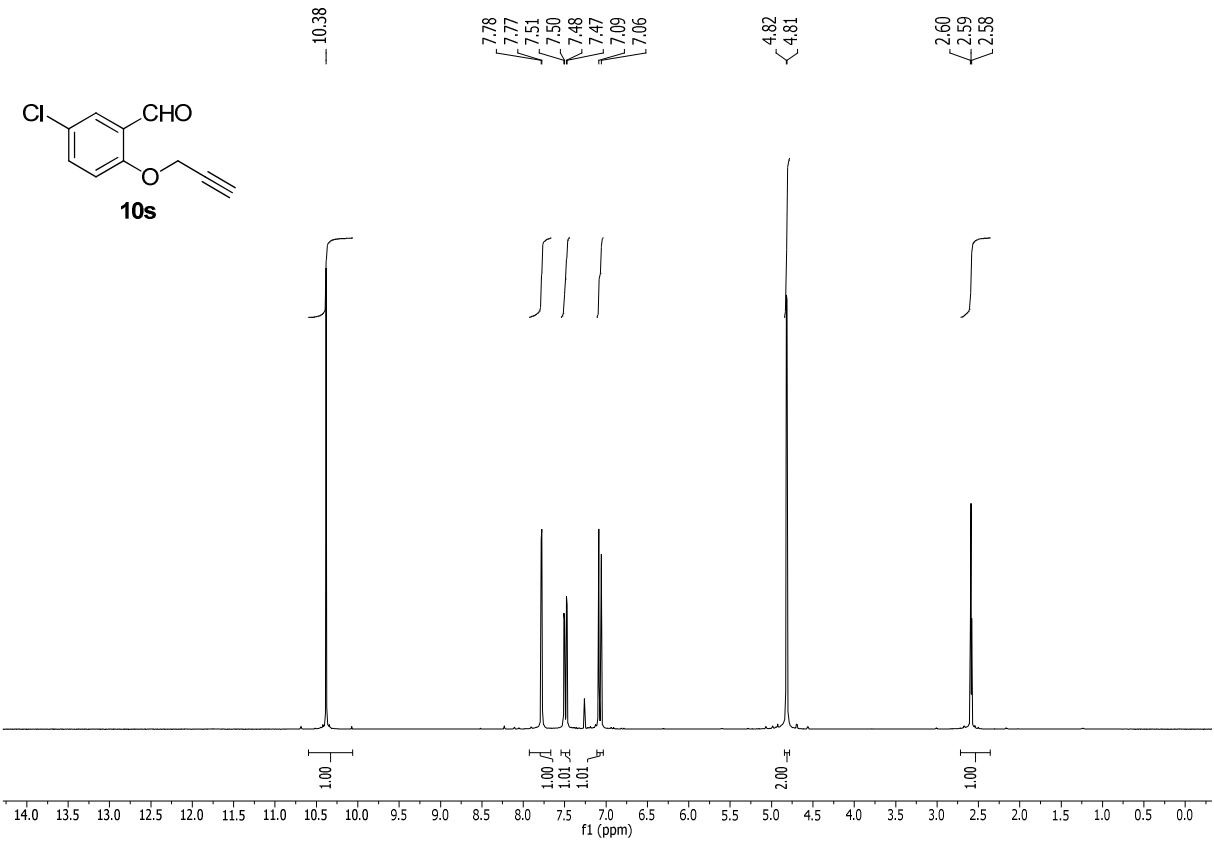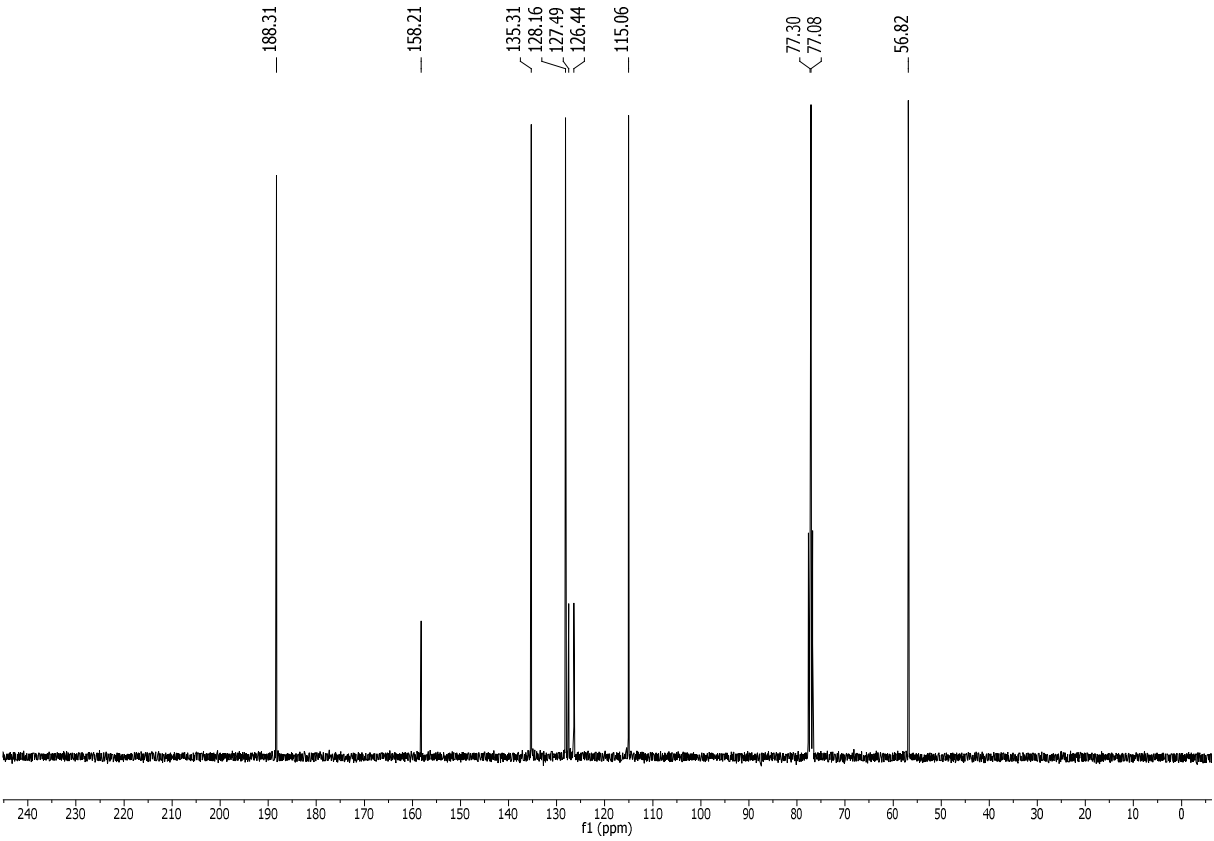

S68

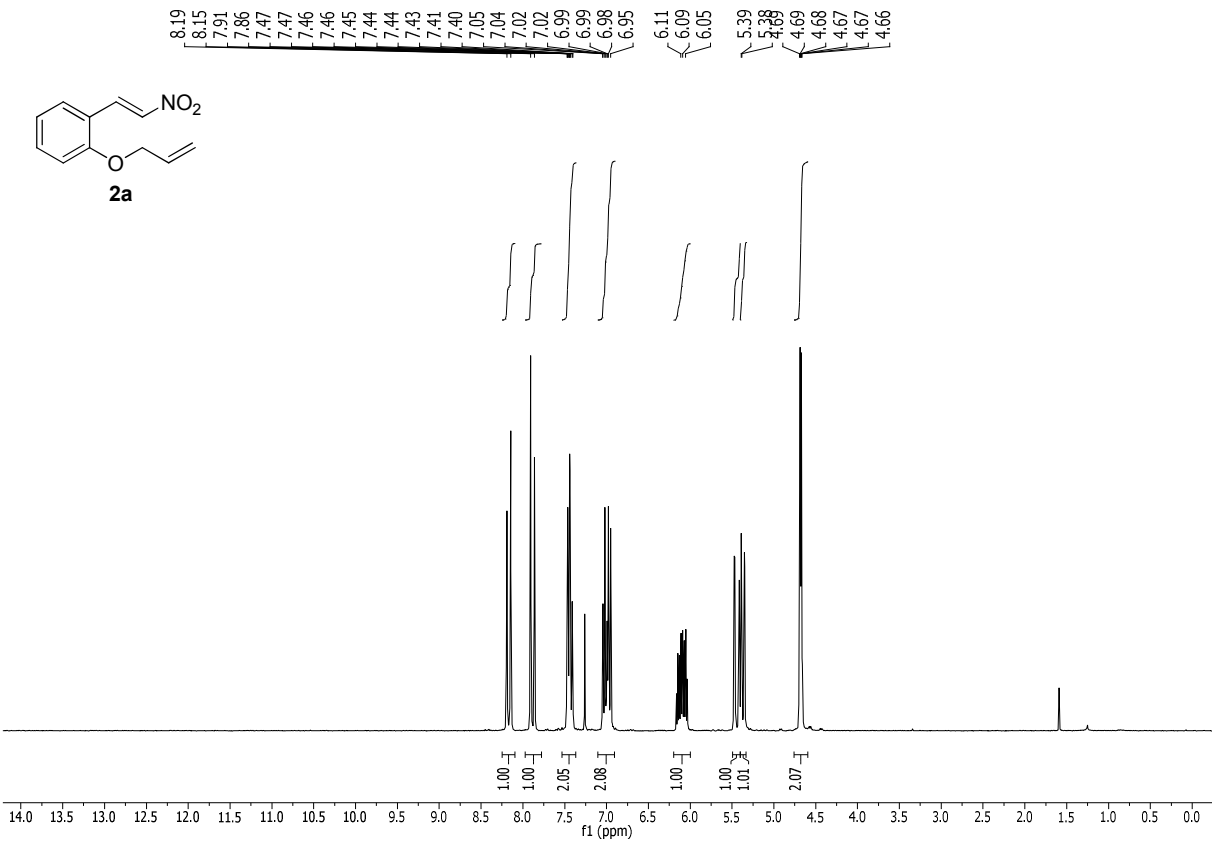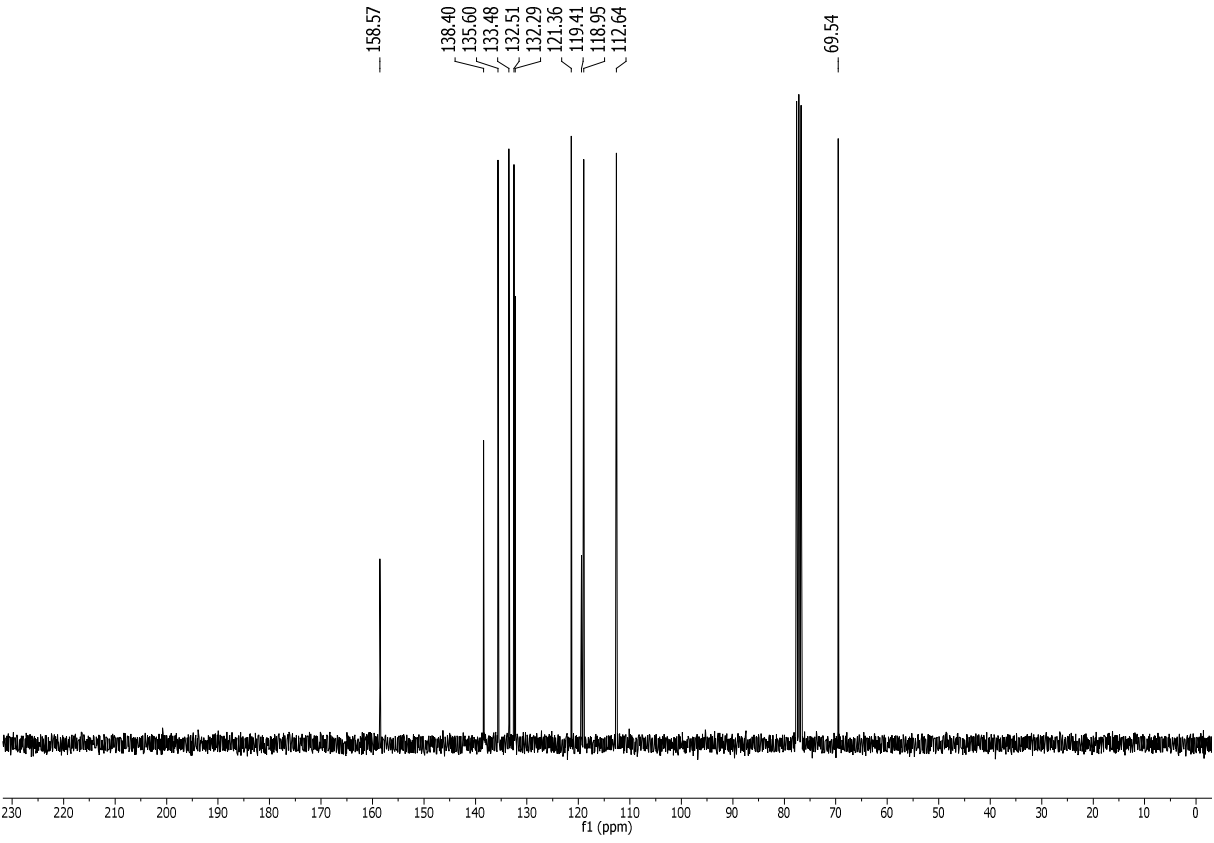



S69

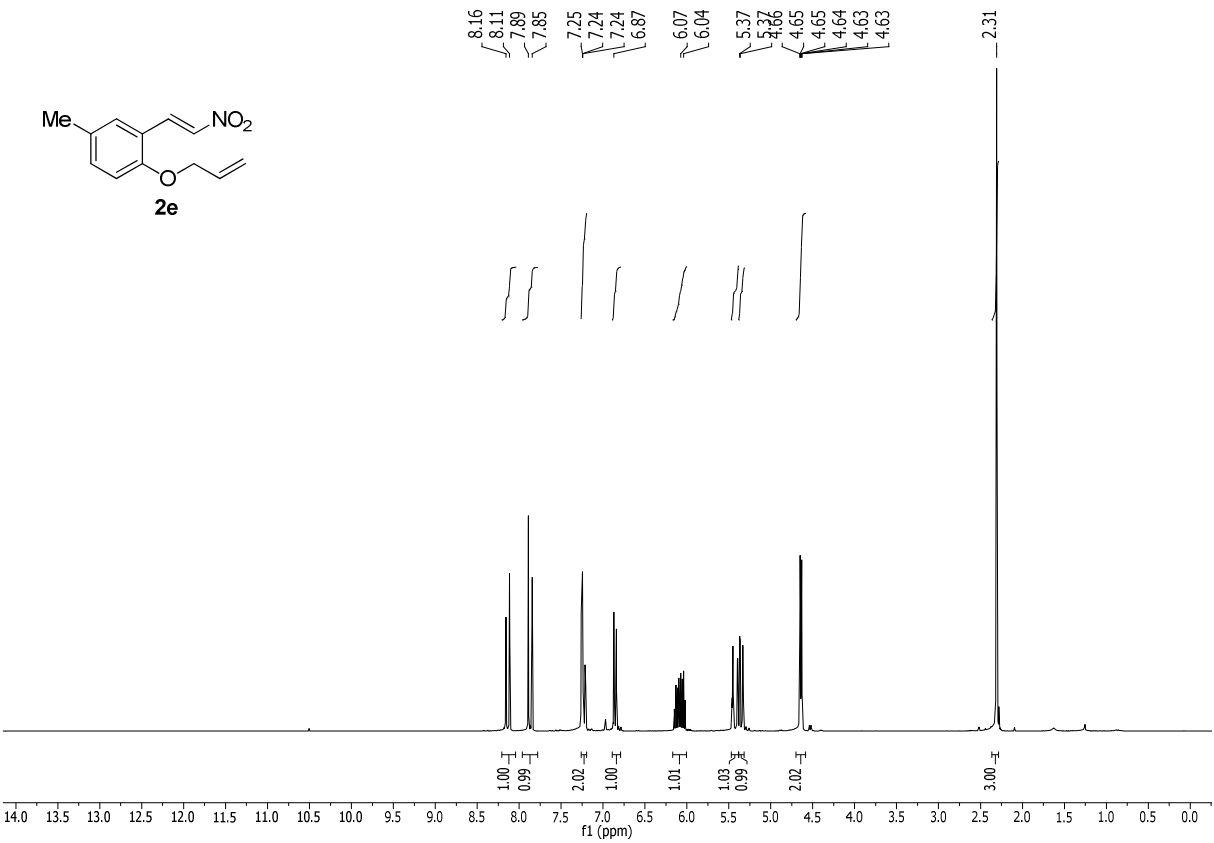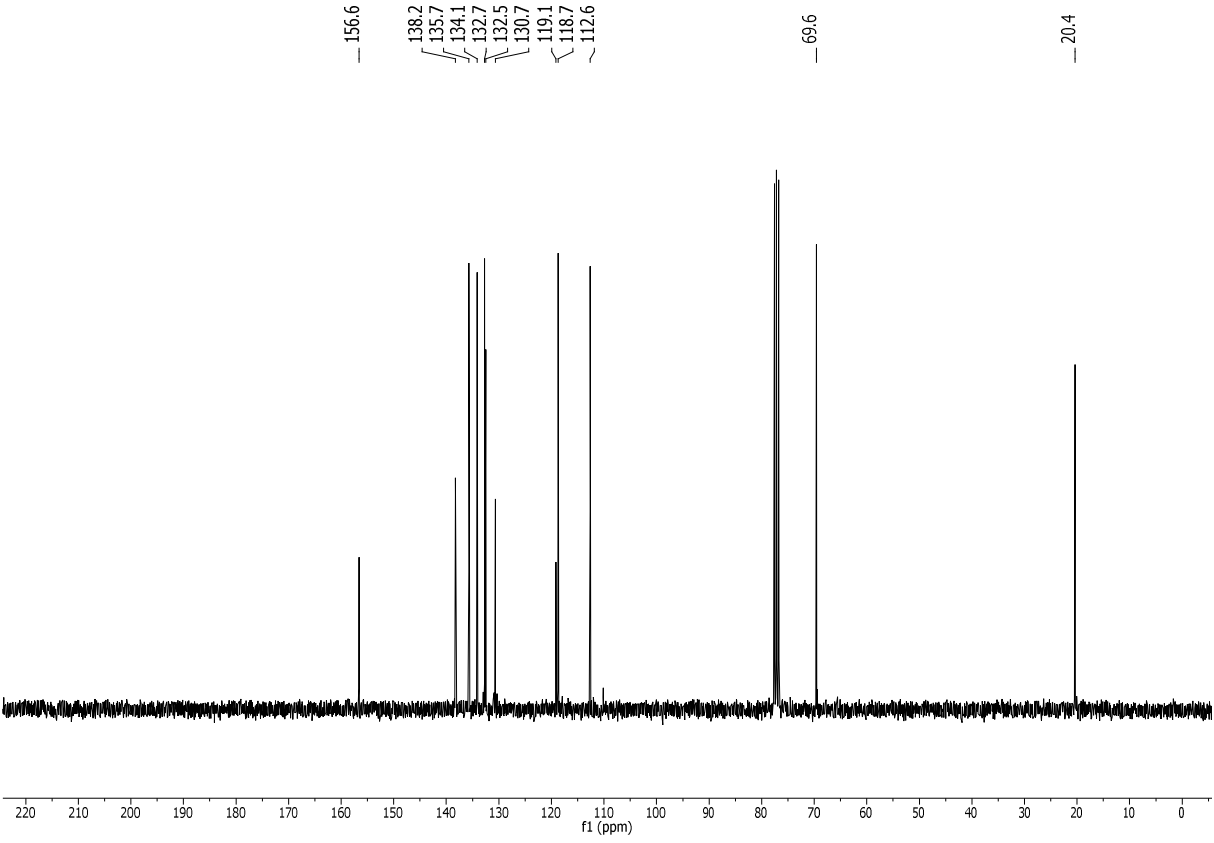

S70

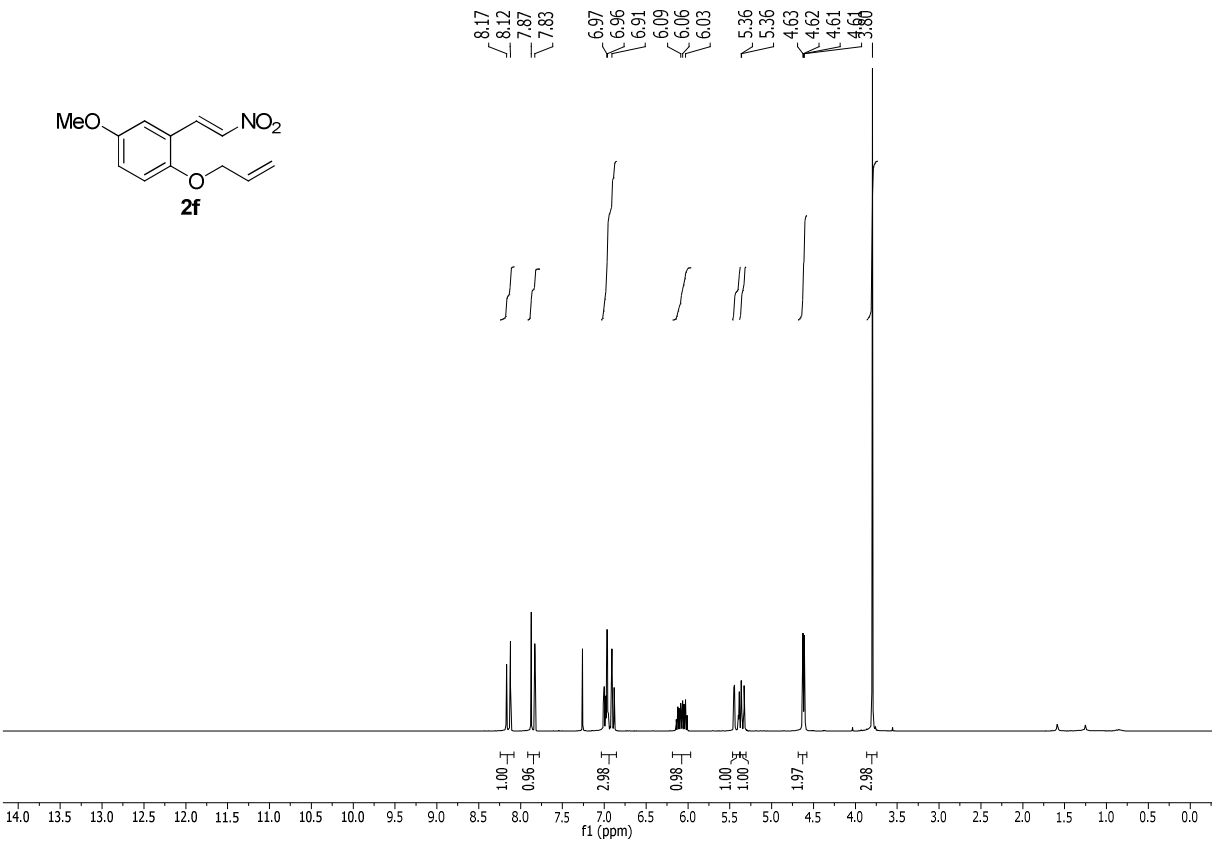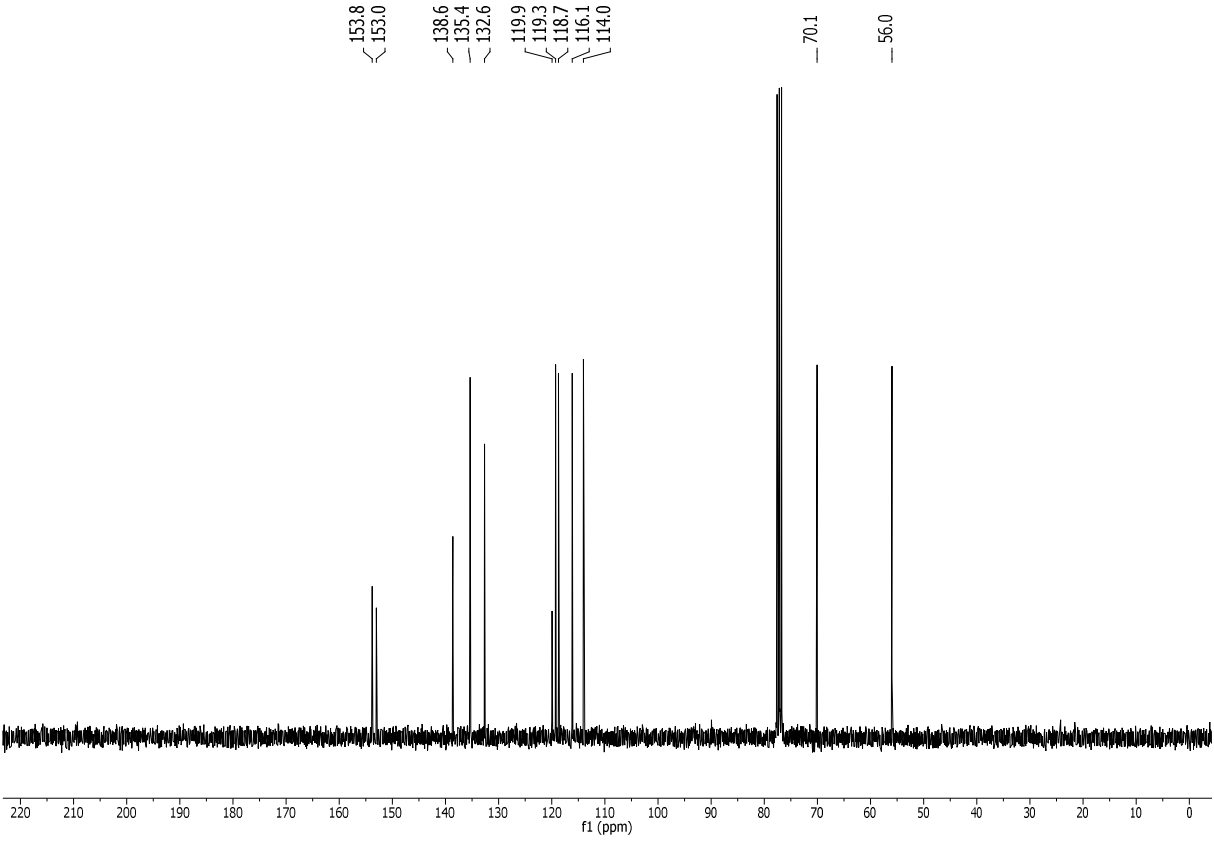

S71

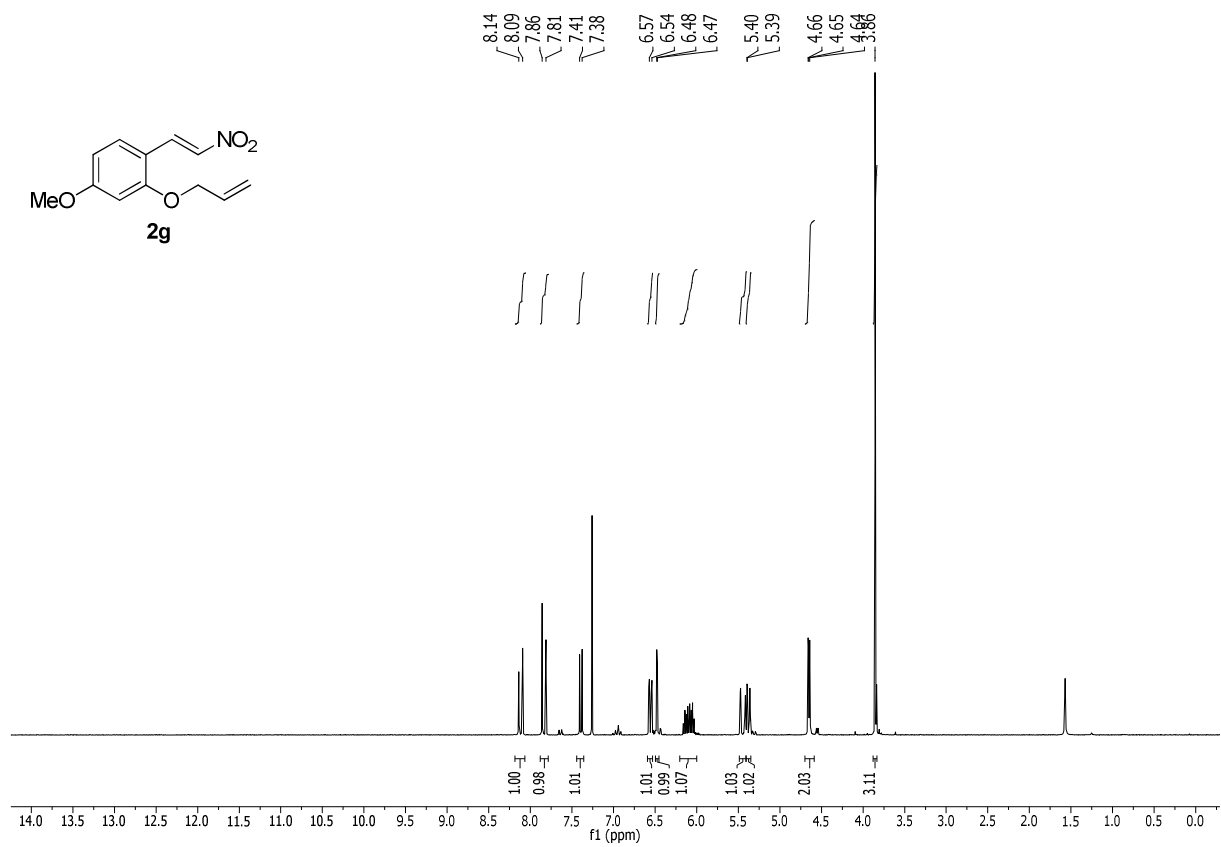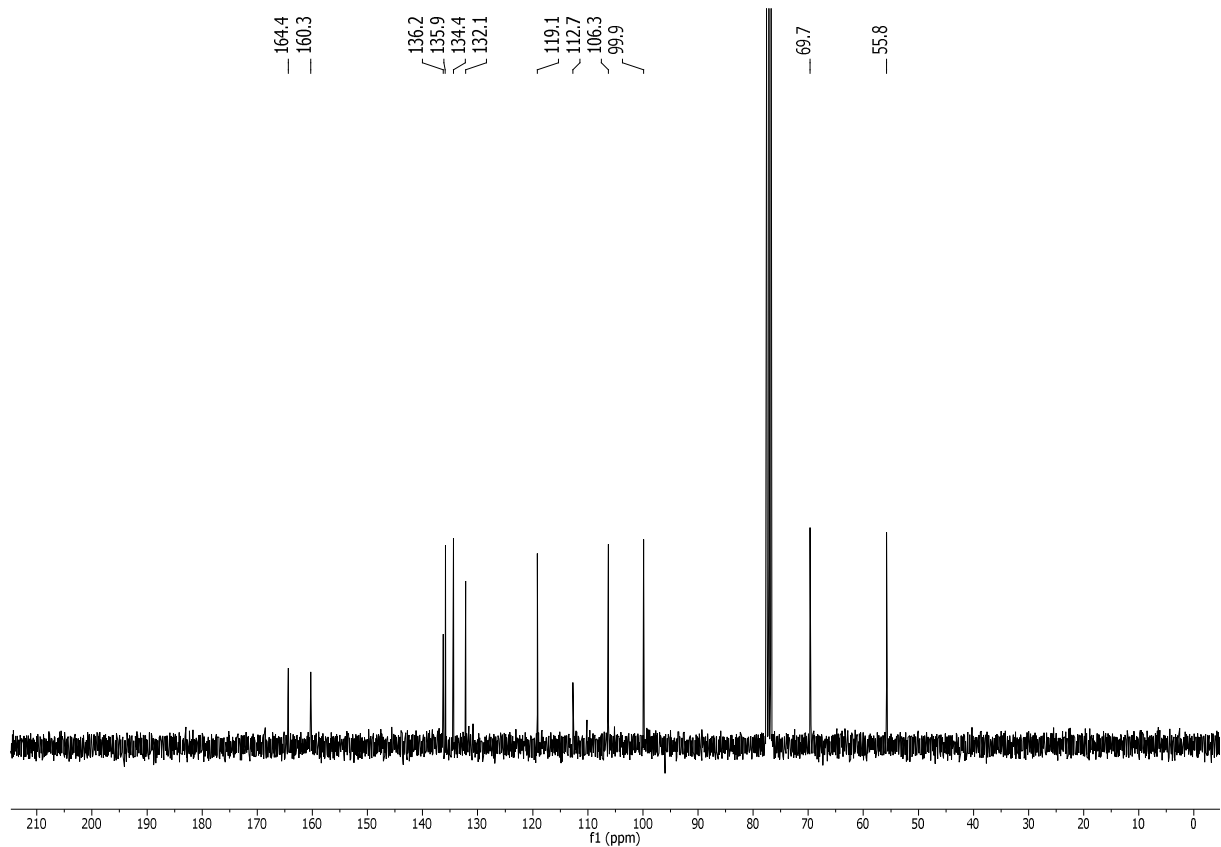

S72

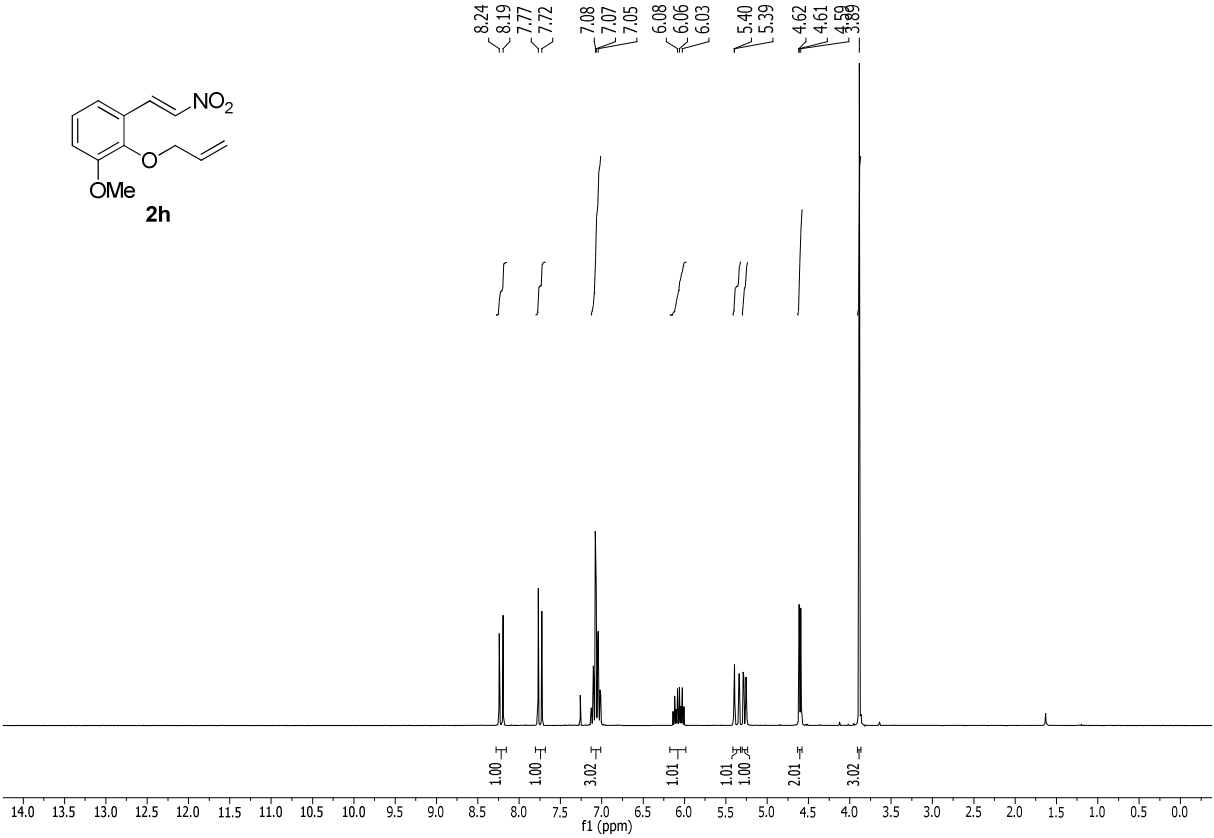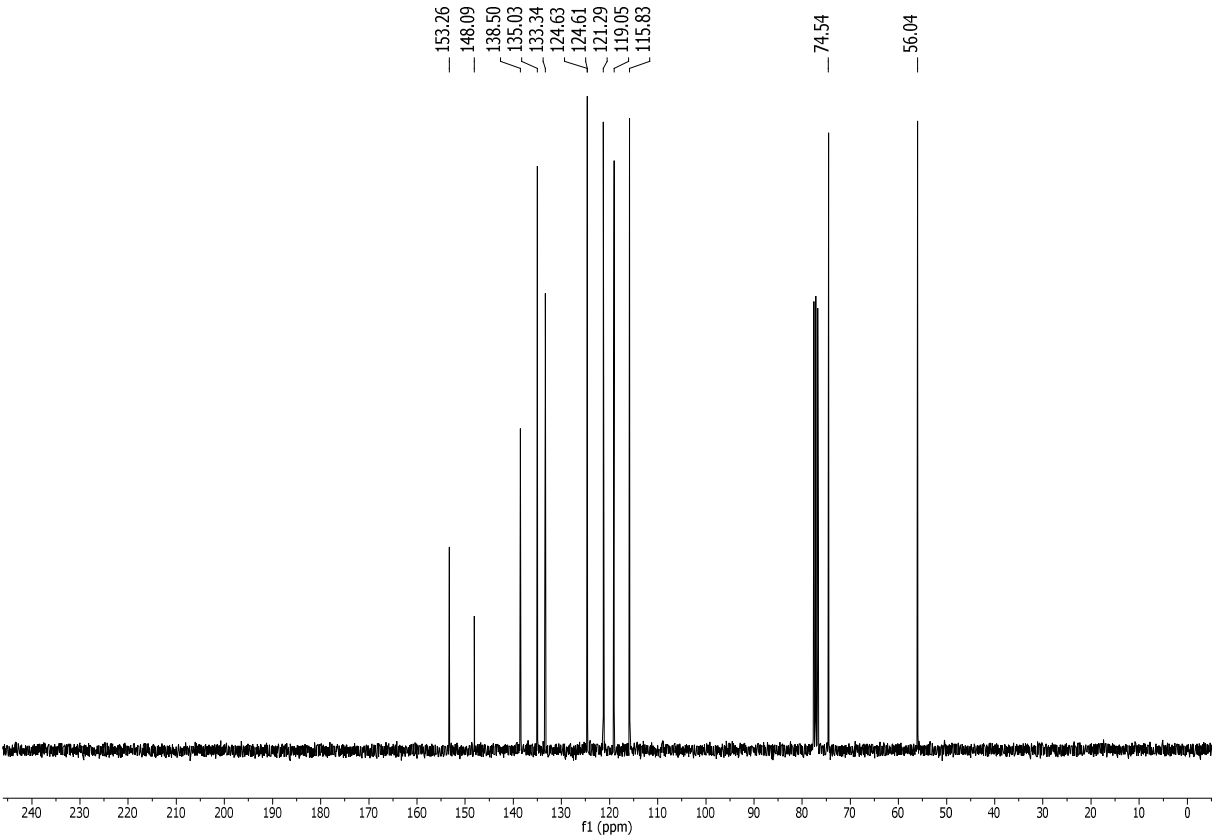

S73

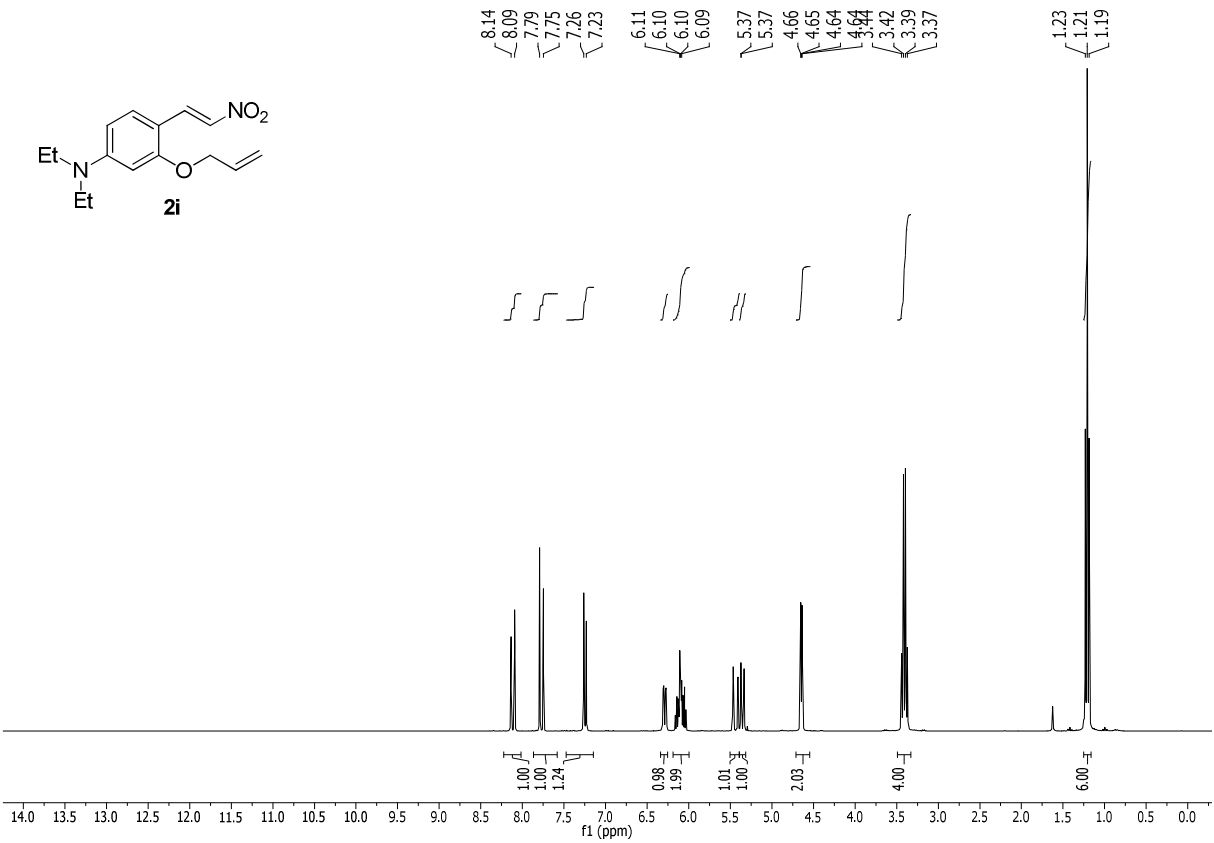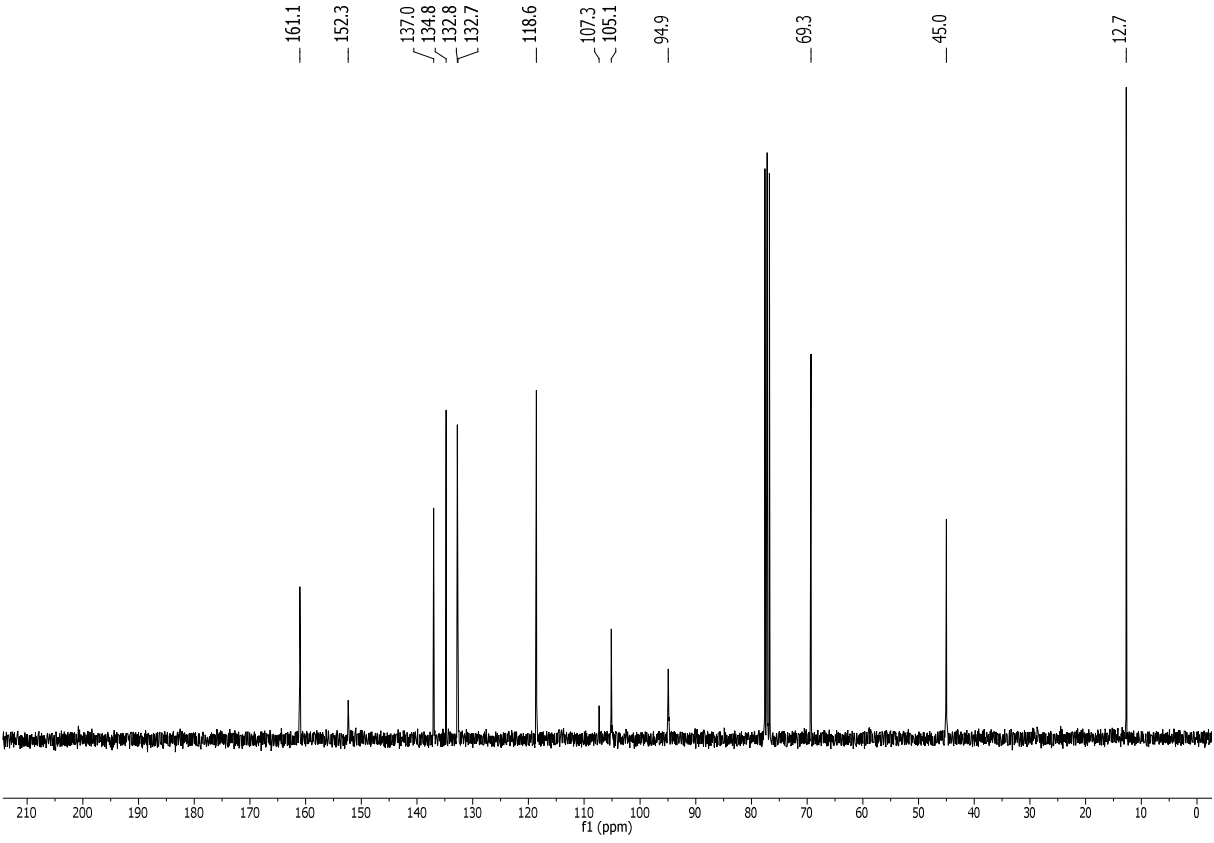

S74

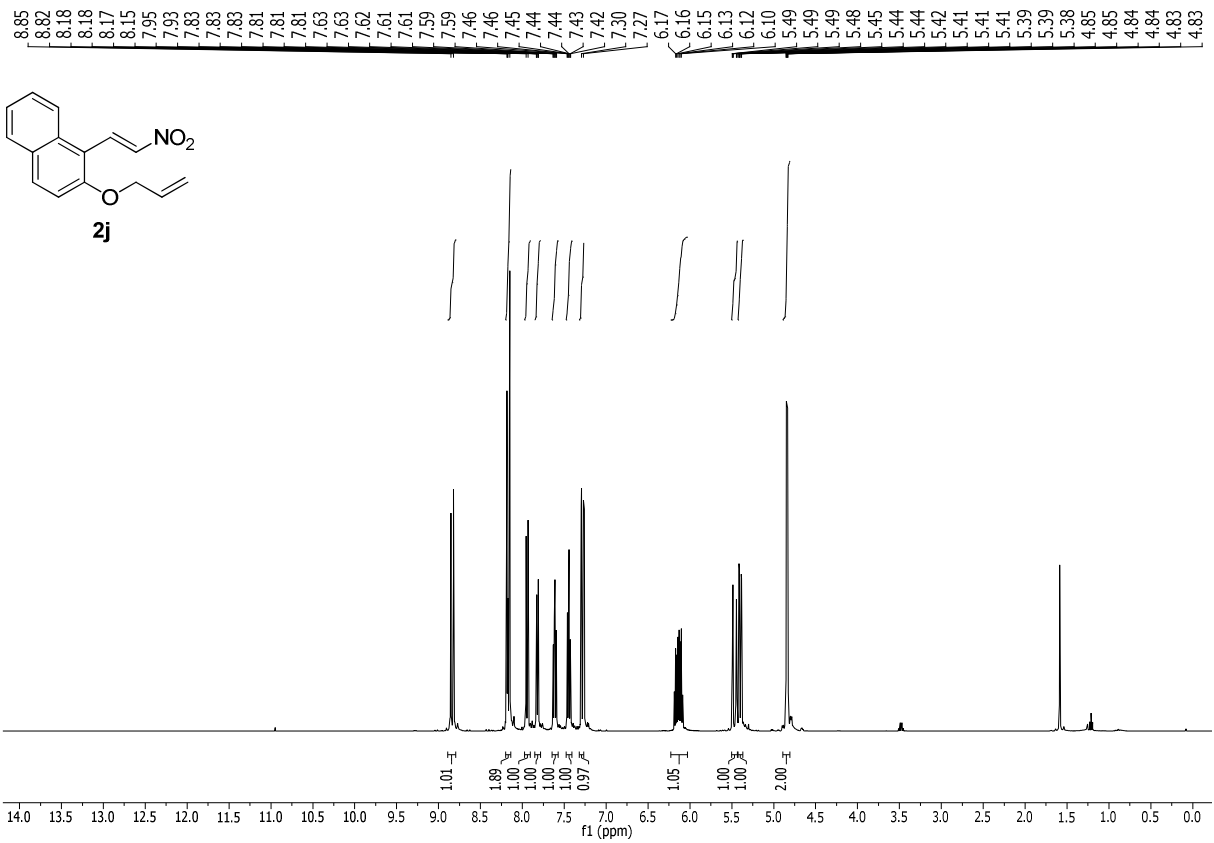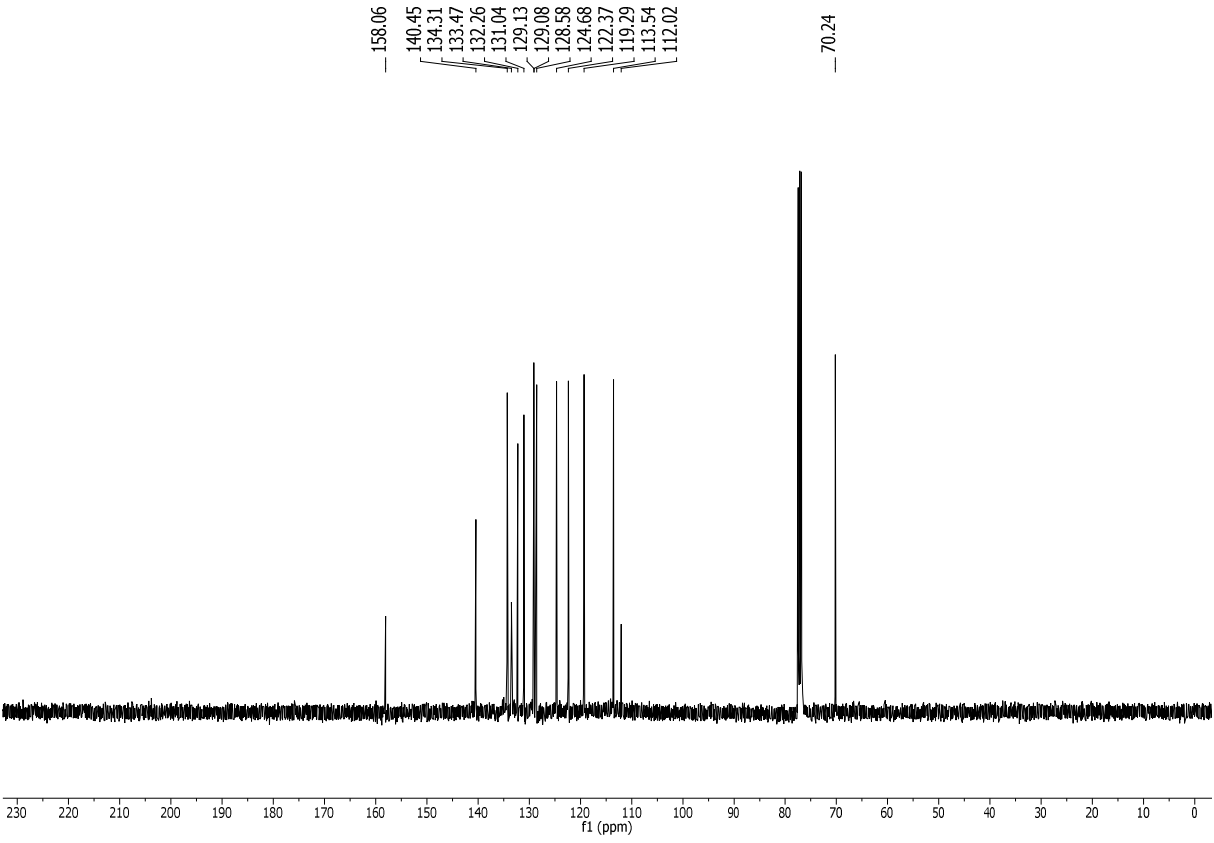

S75

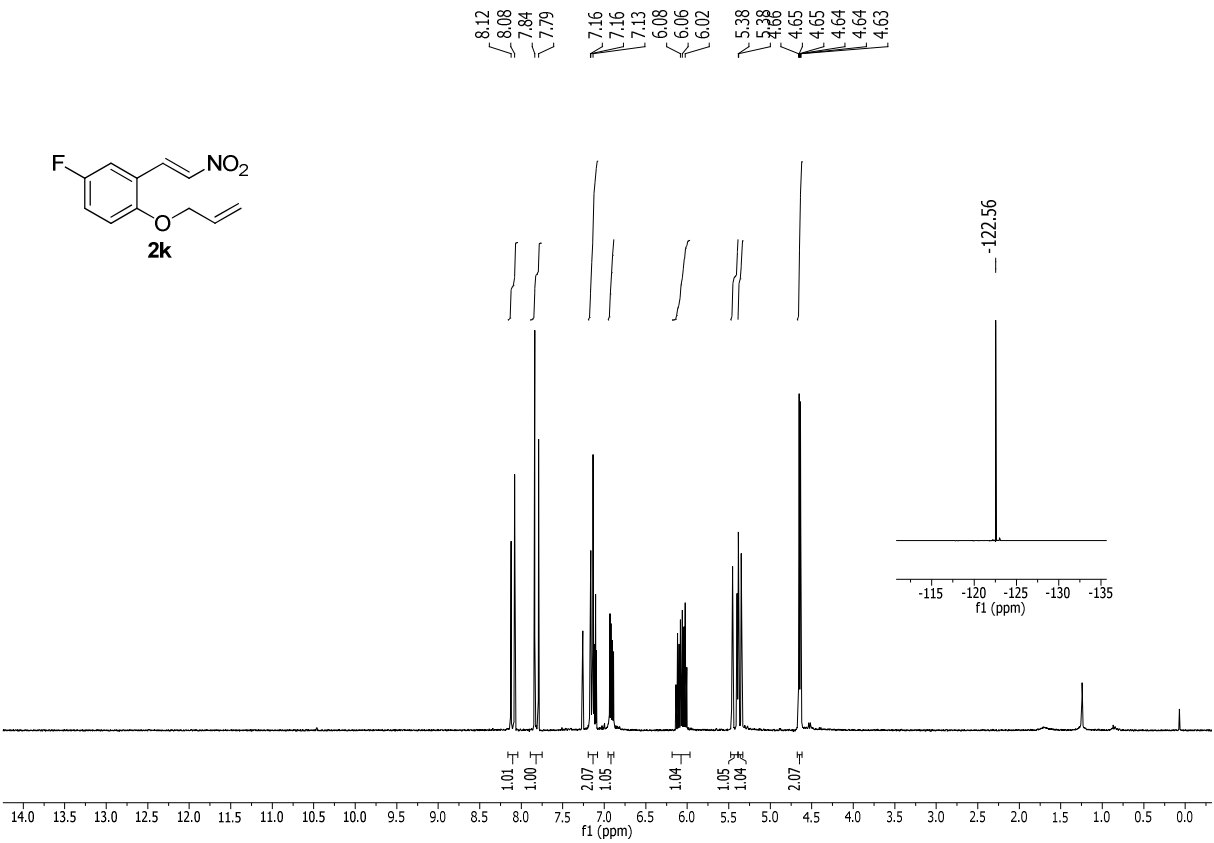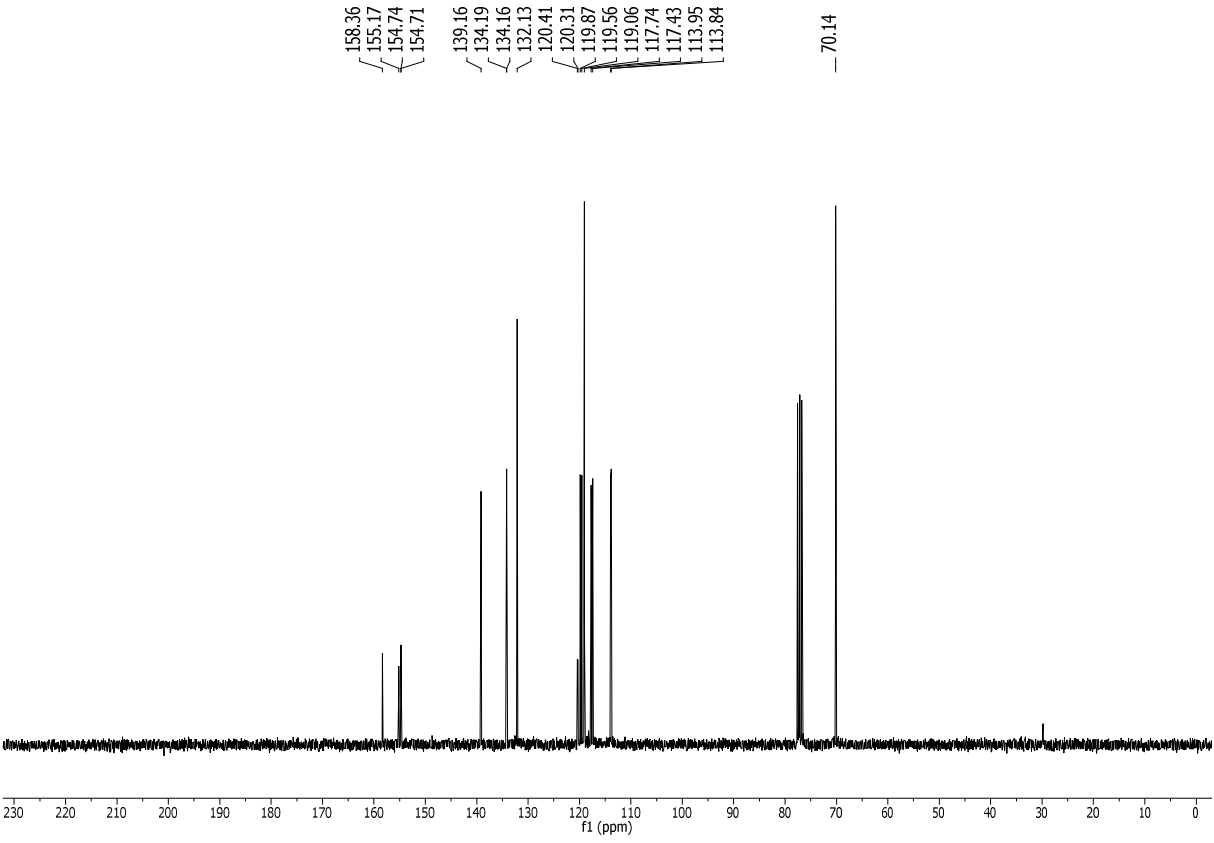

S76

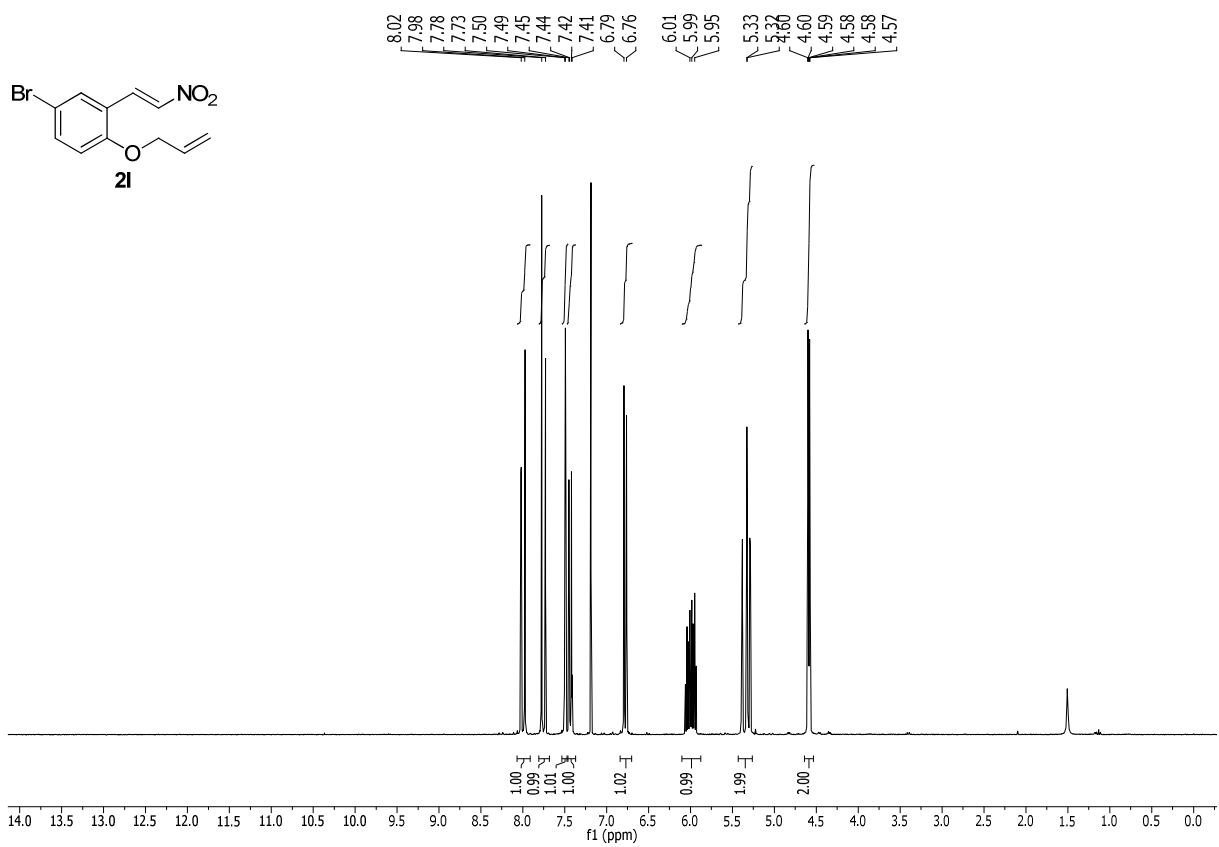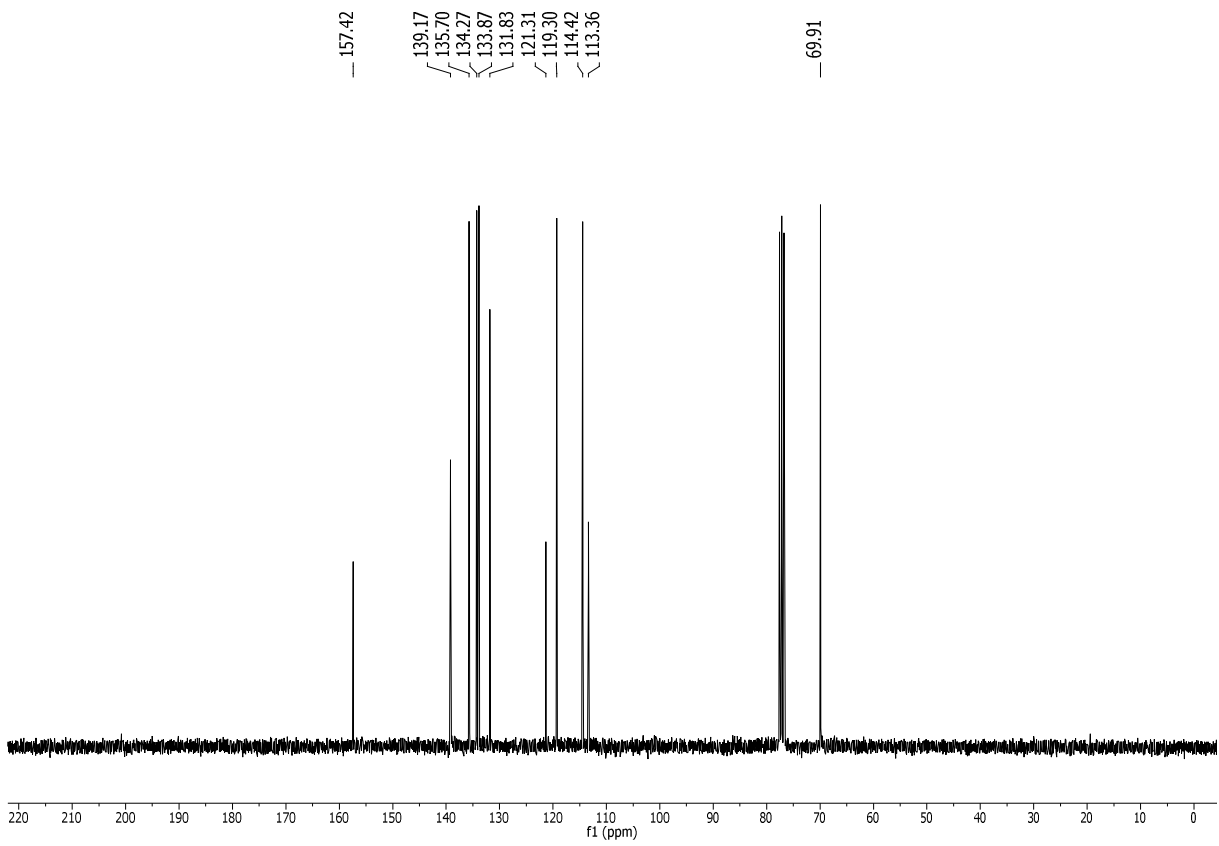



S77

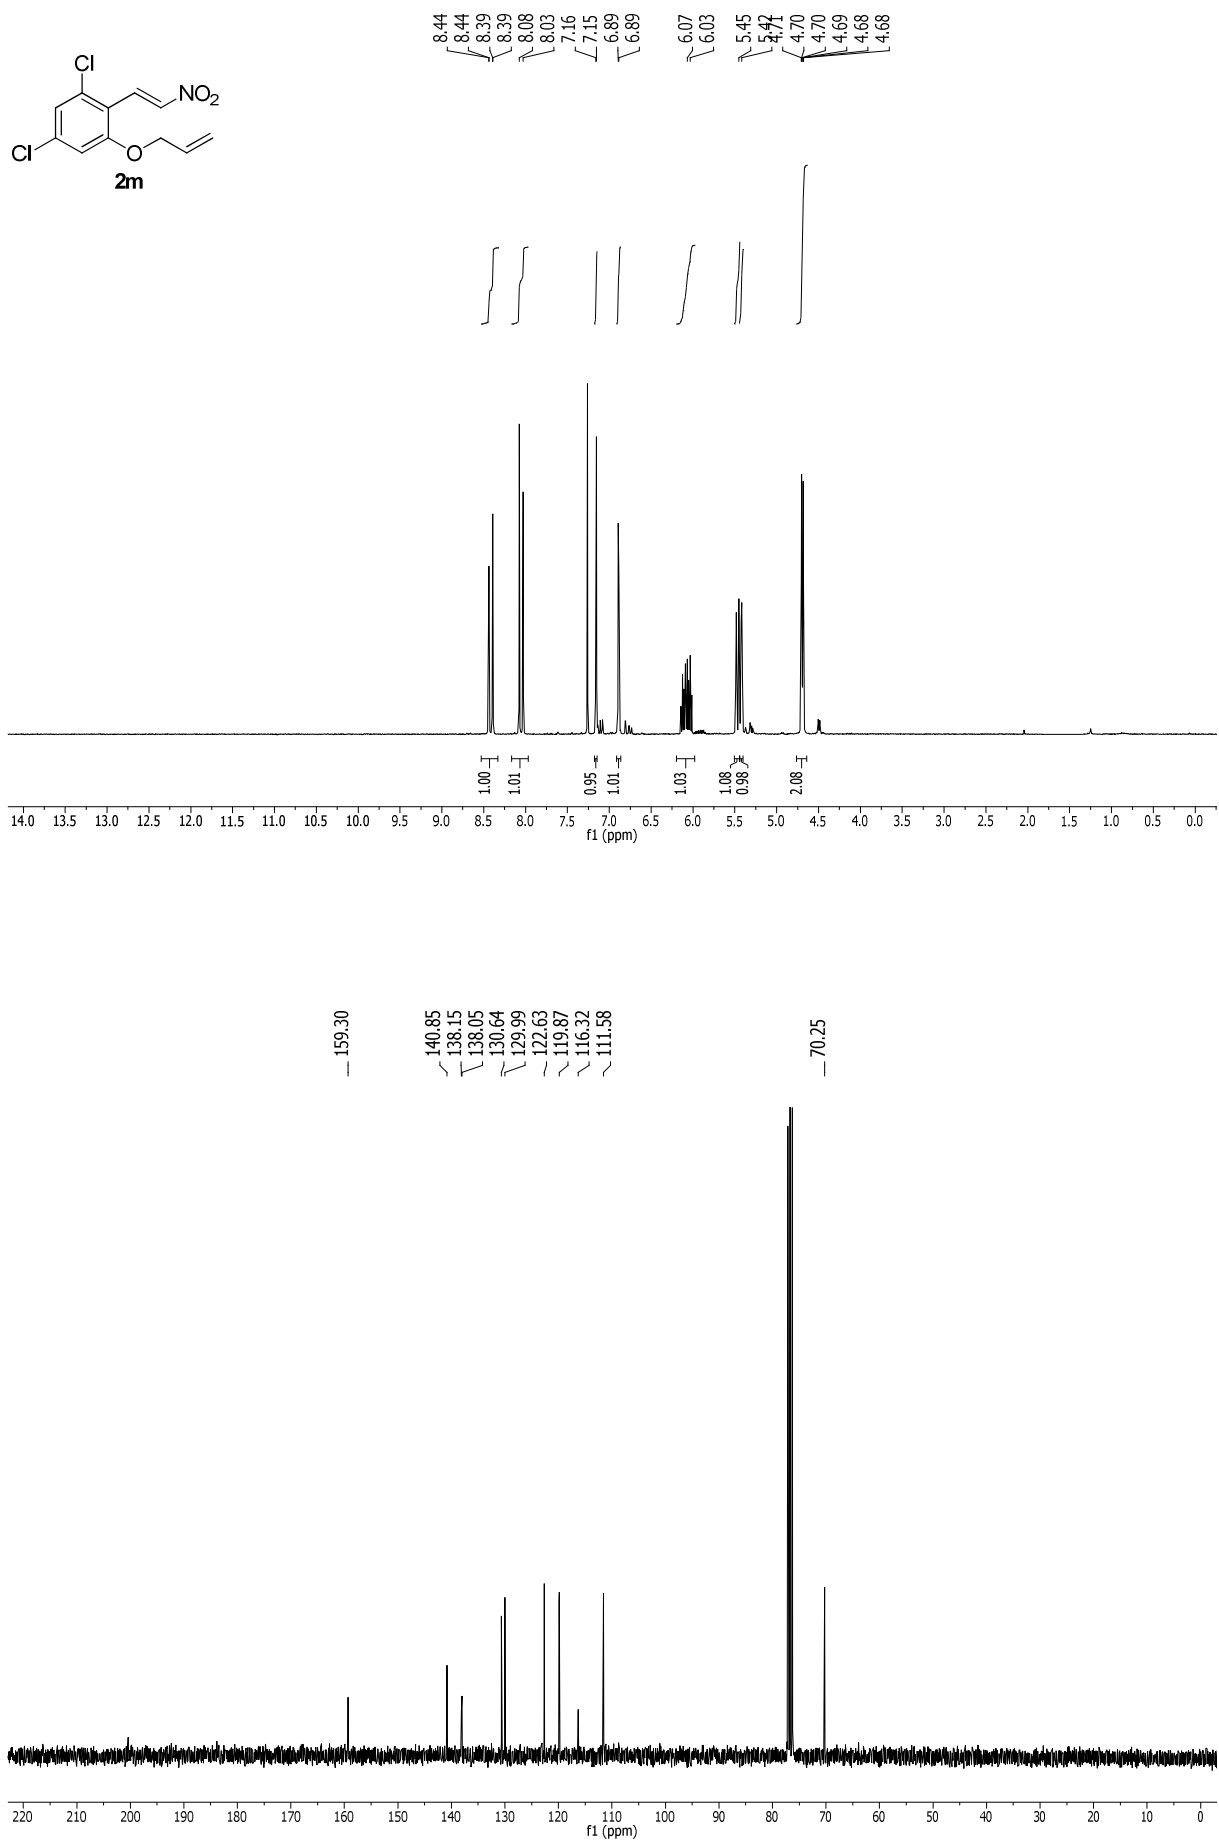

S78

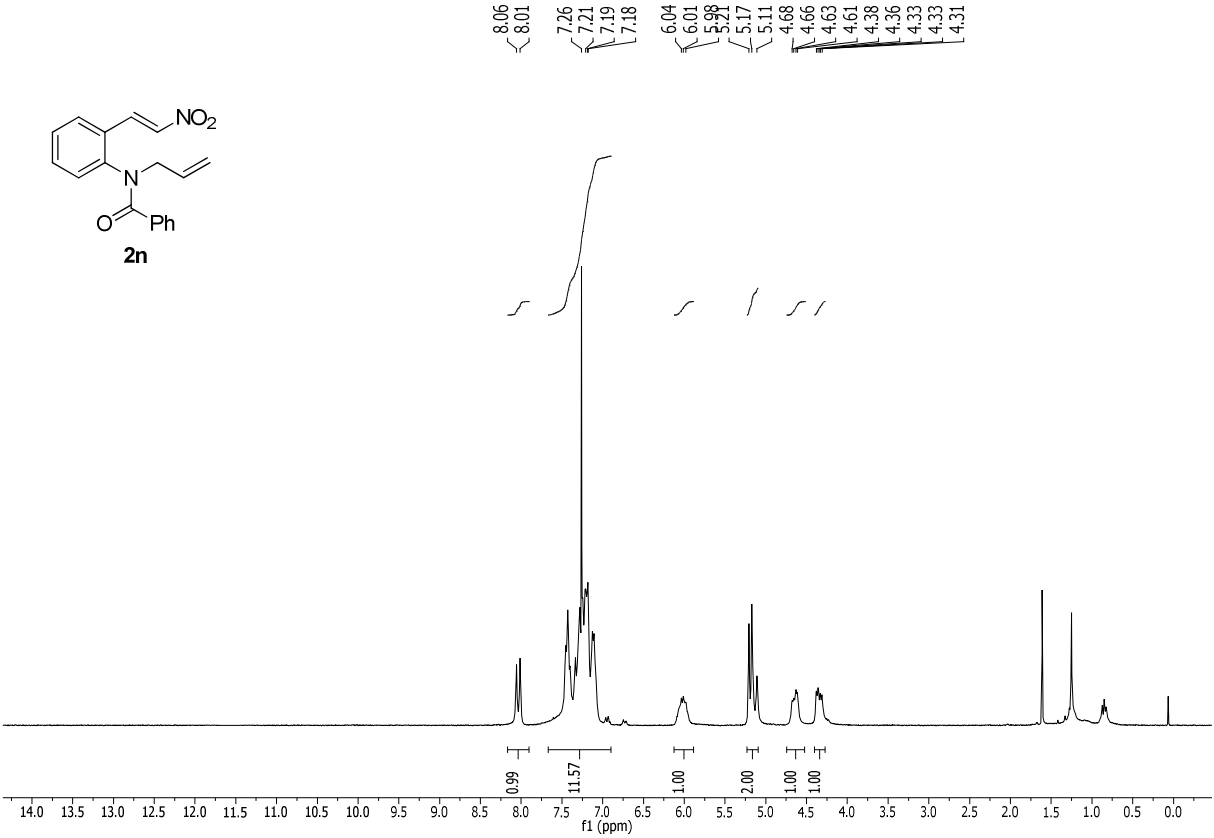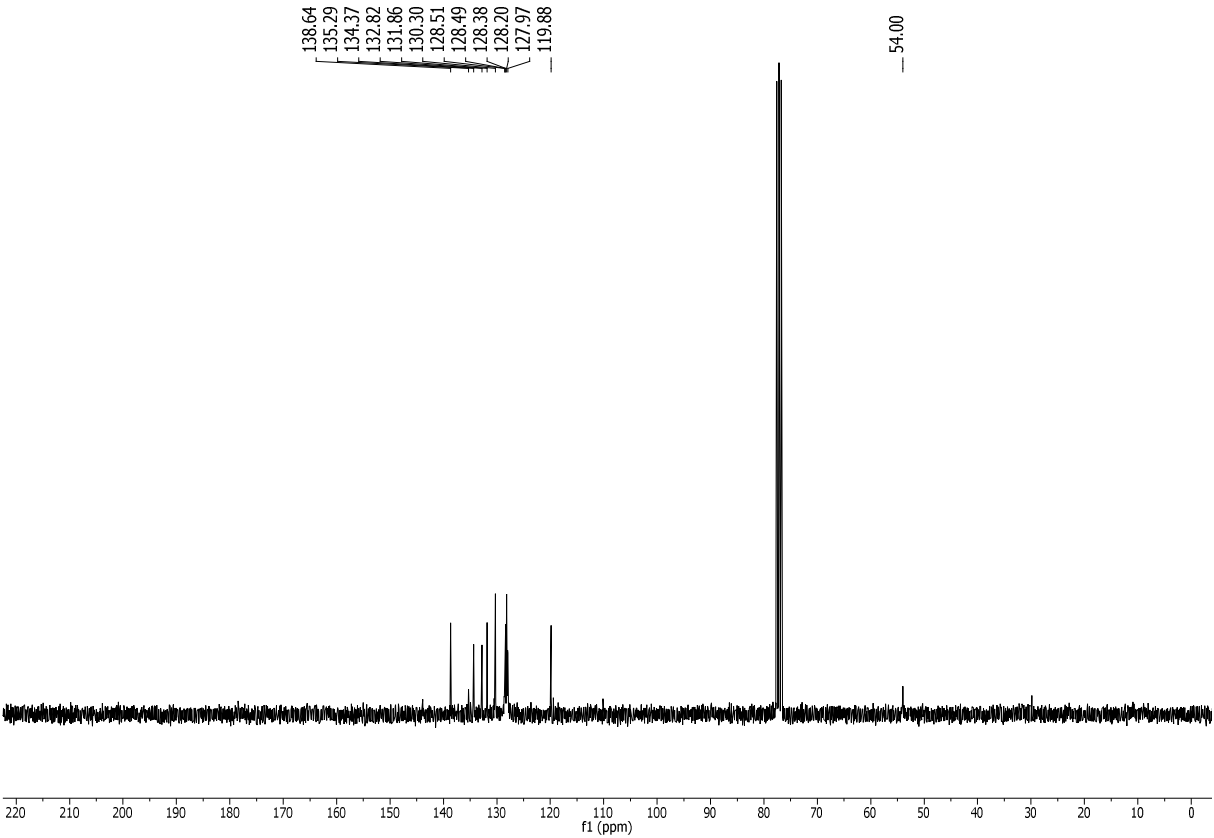

S79

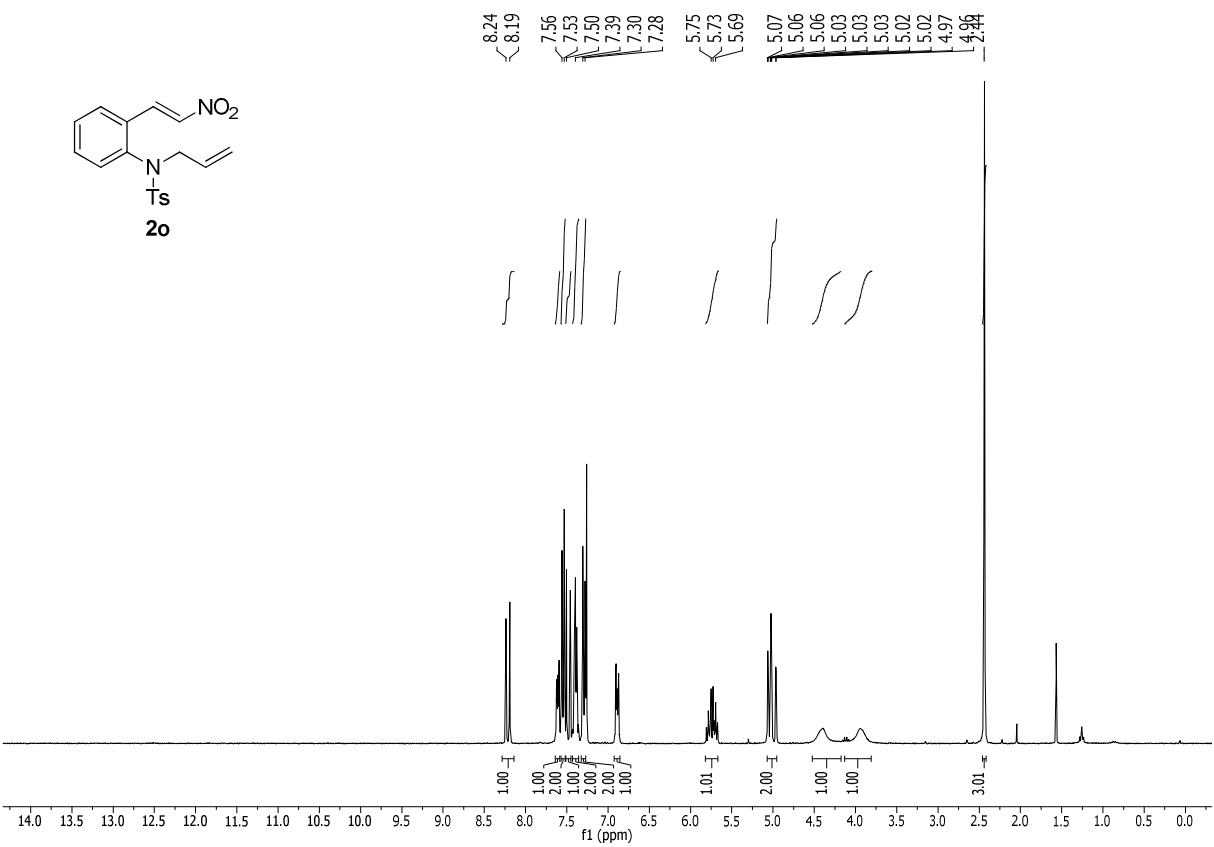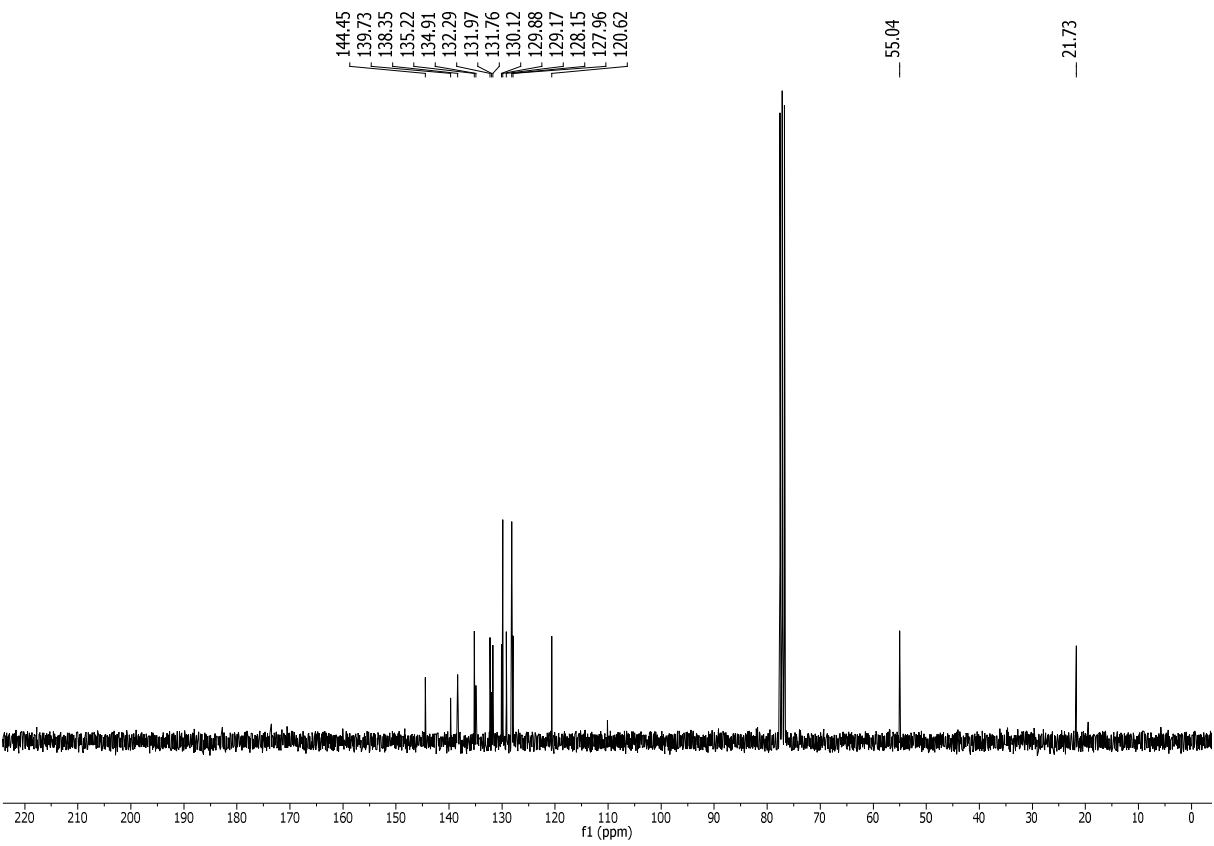

S80

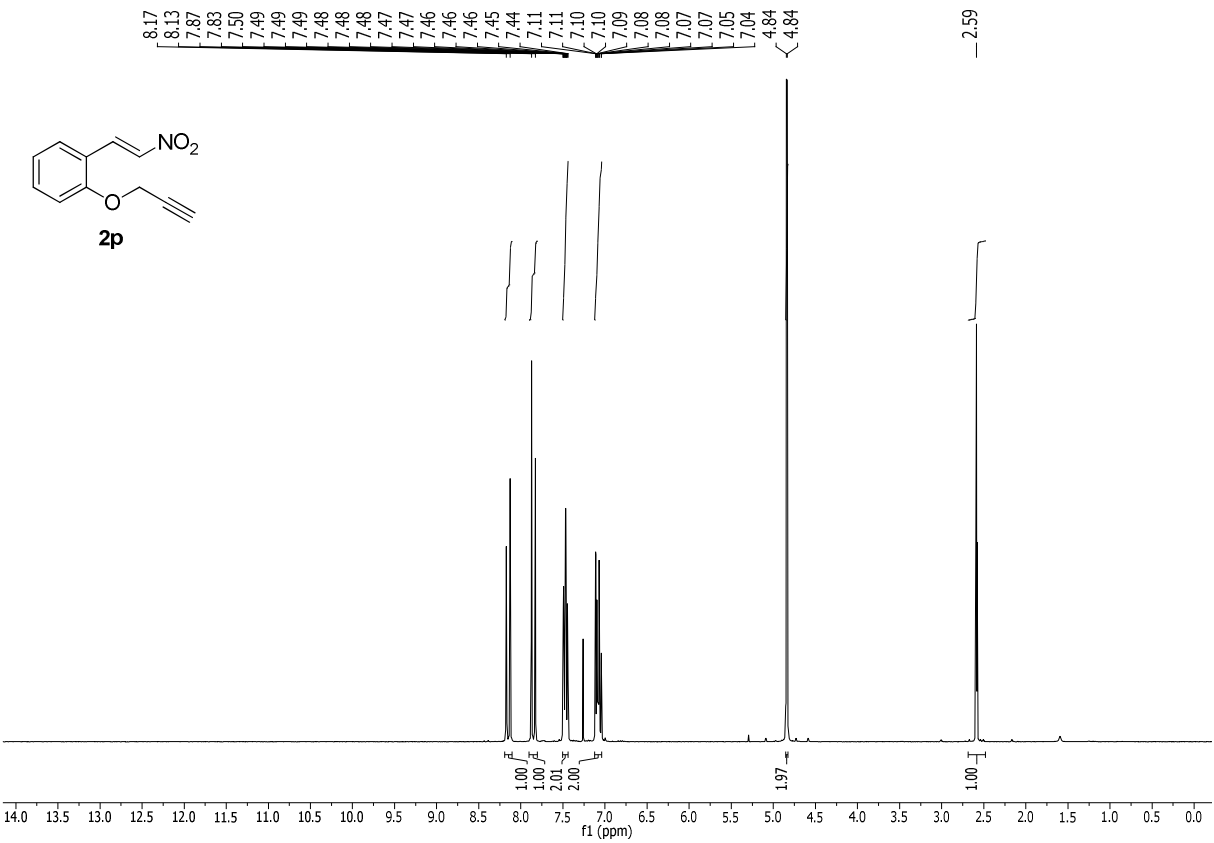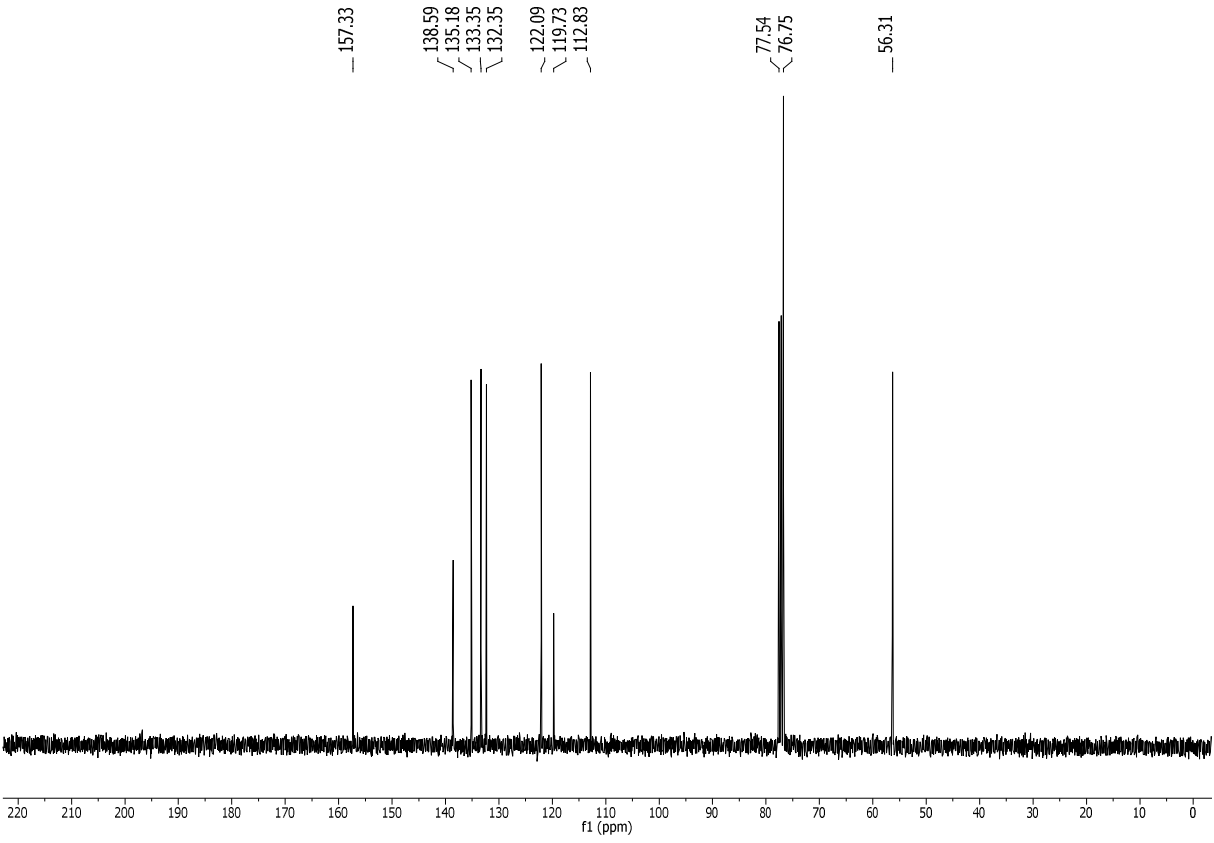

S81

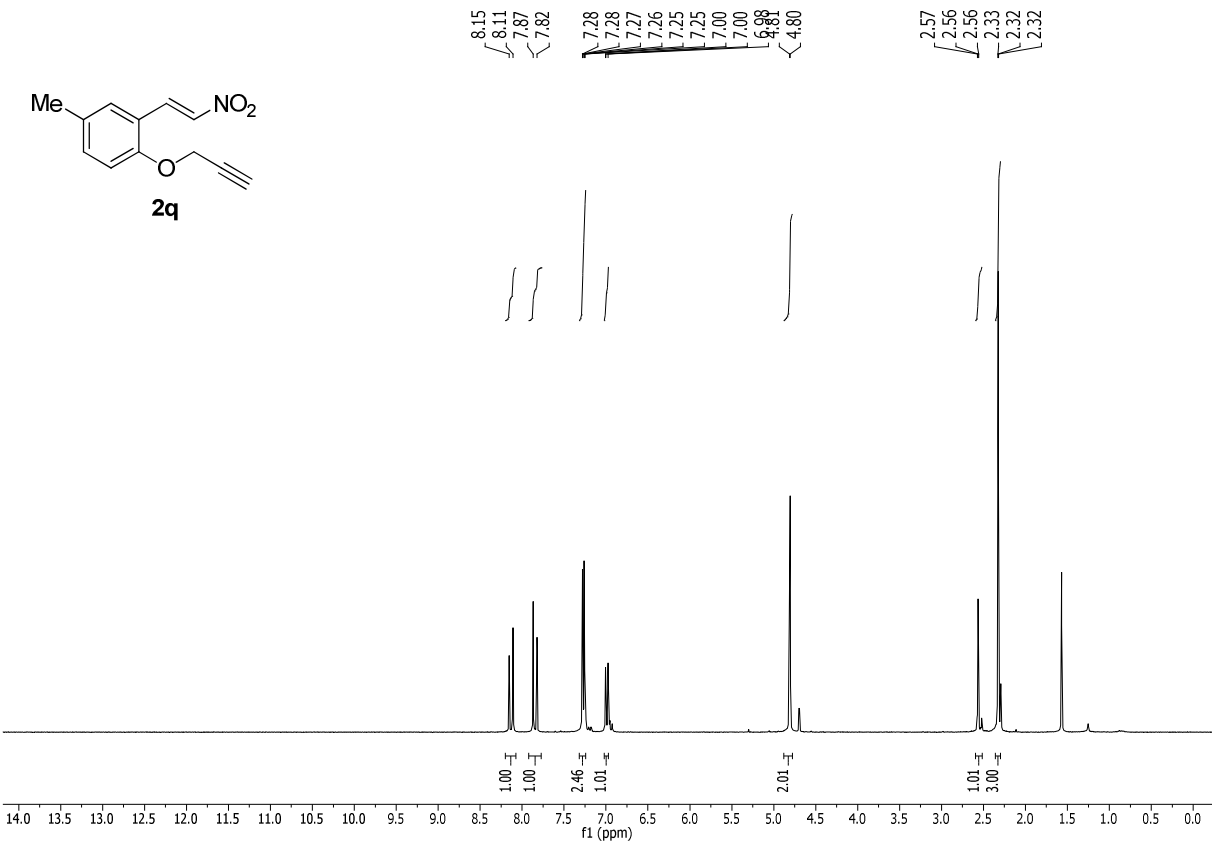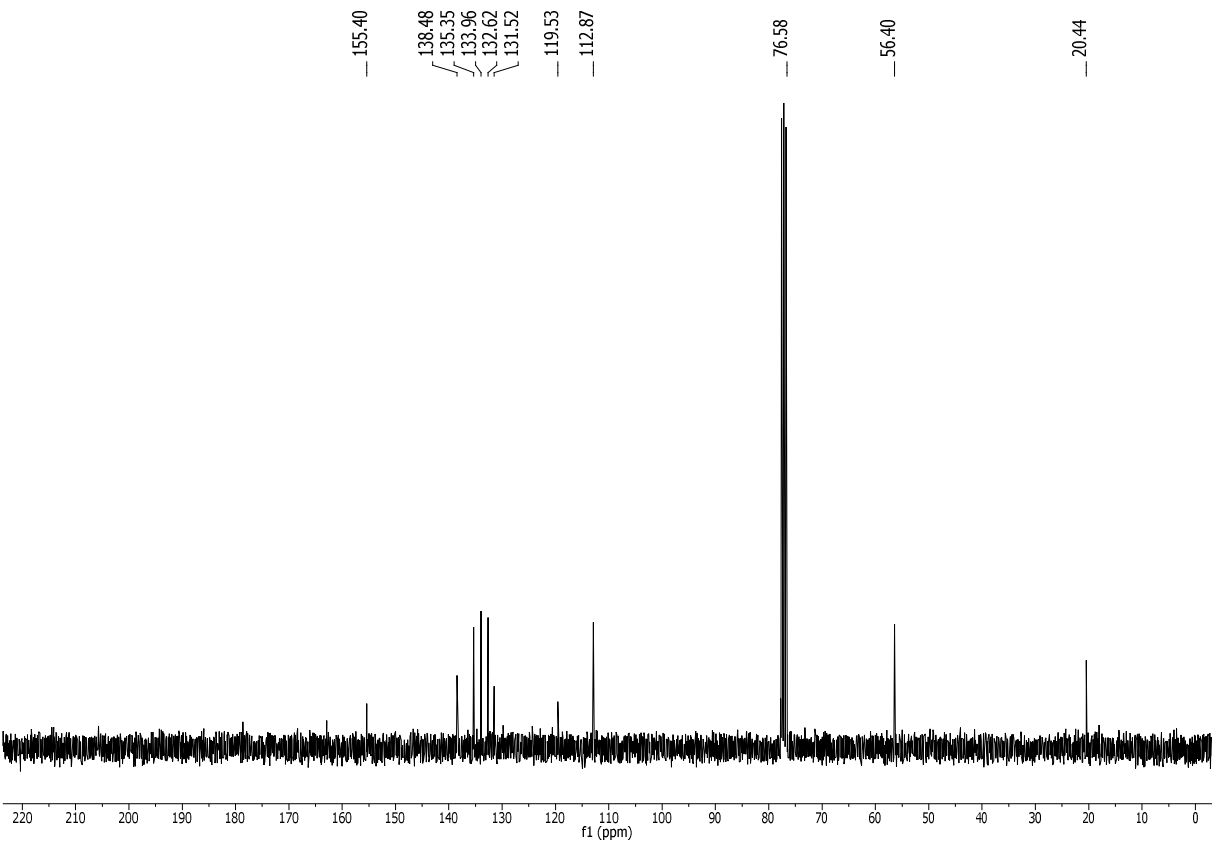

S82

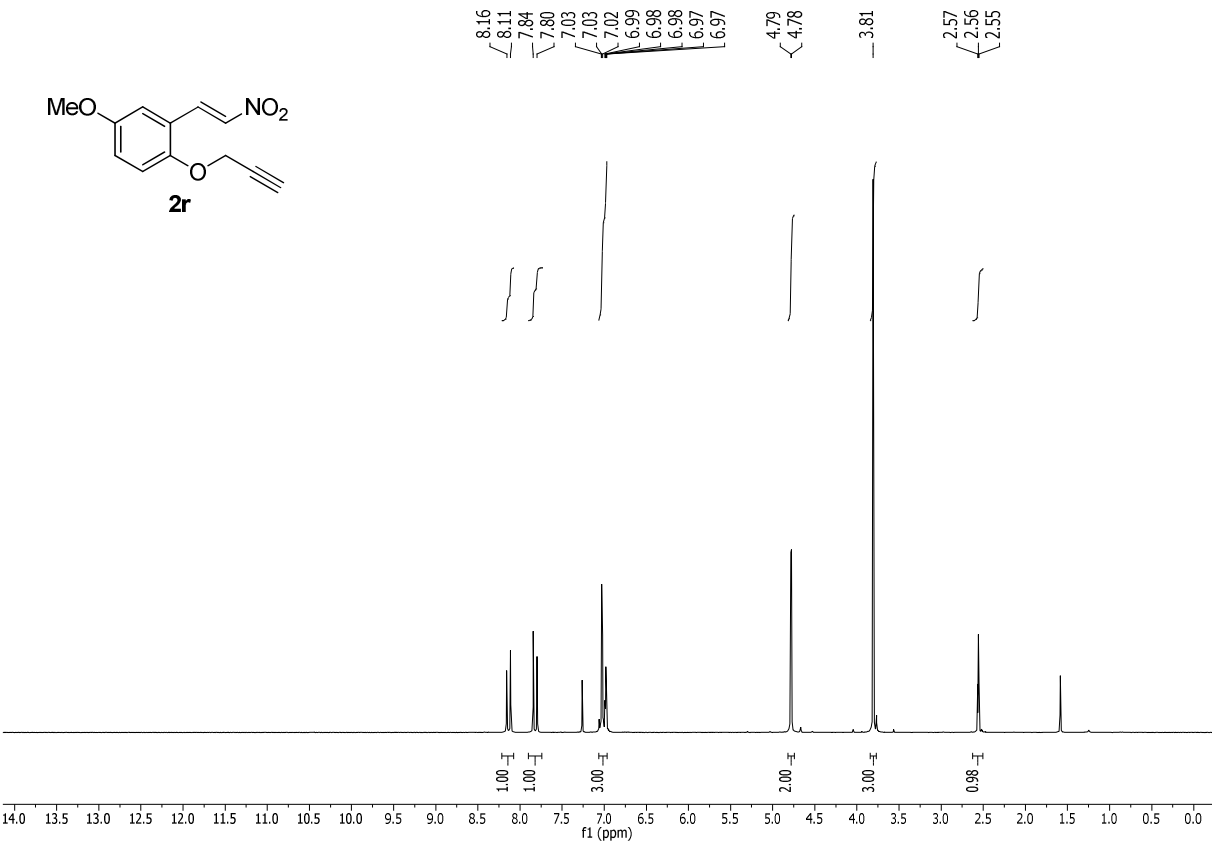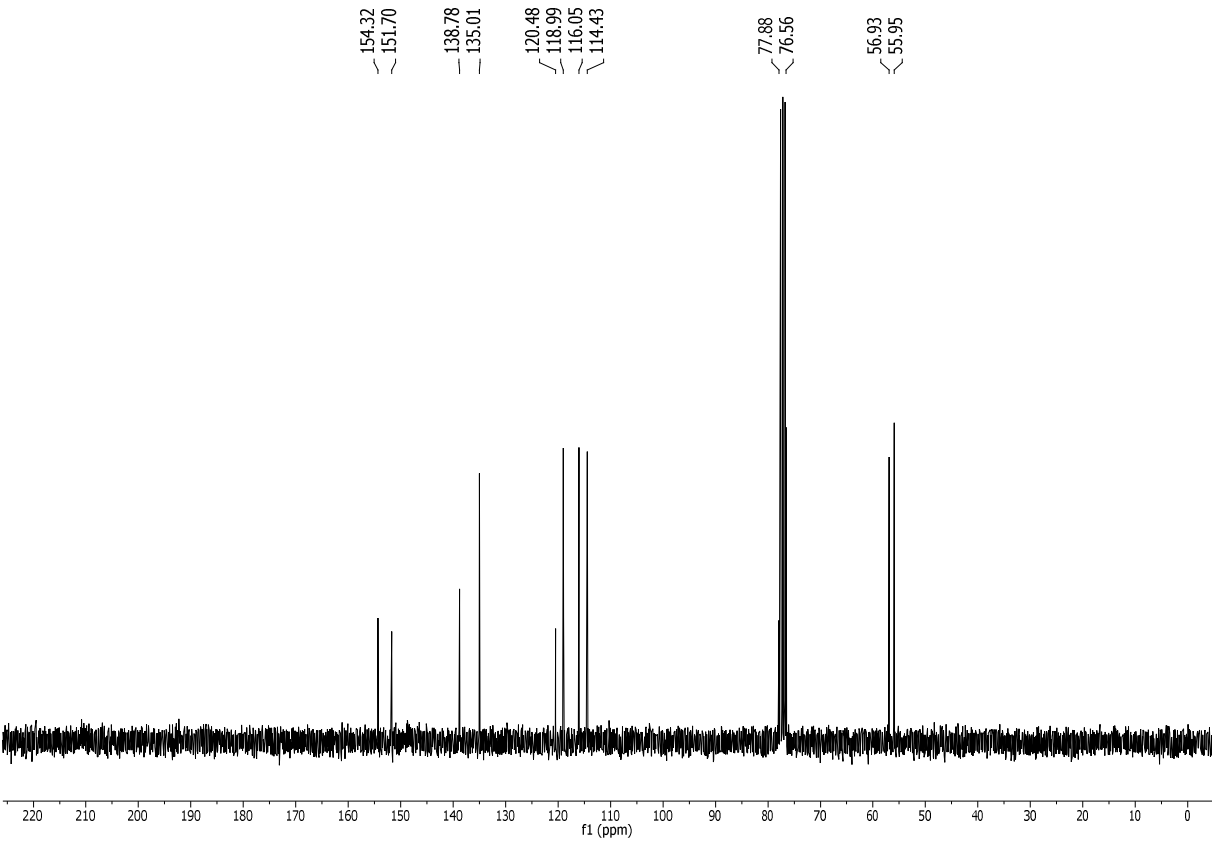

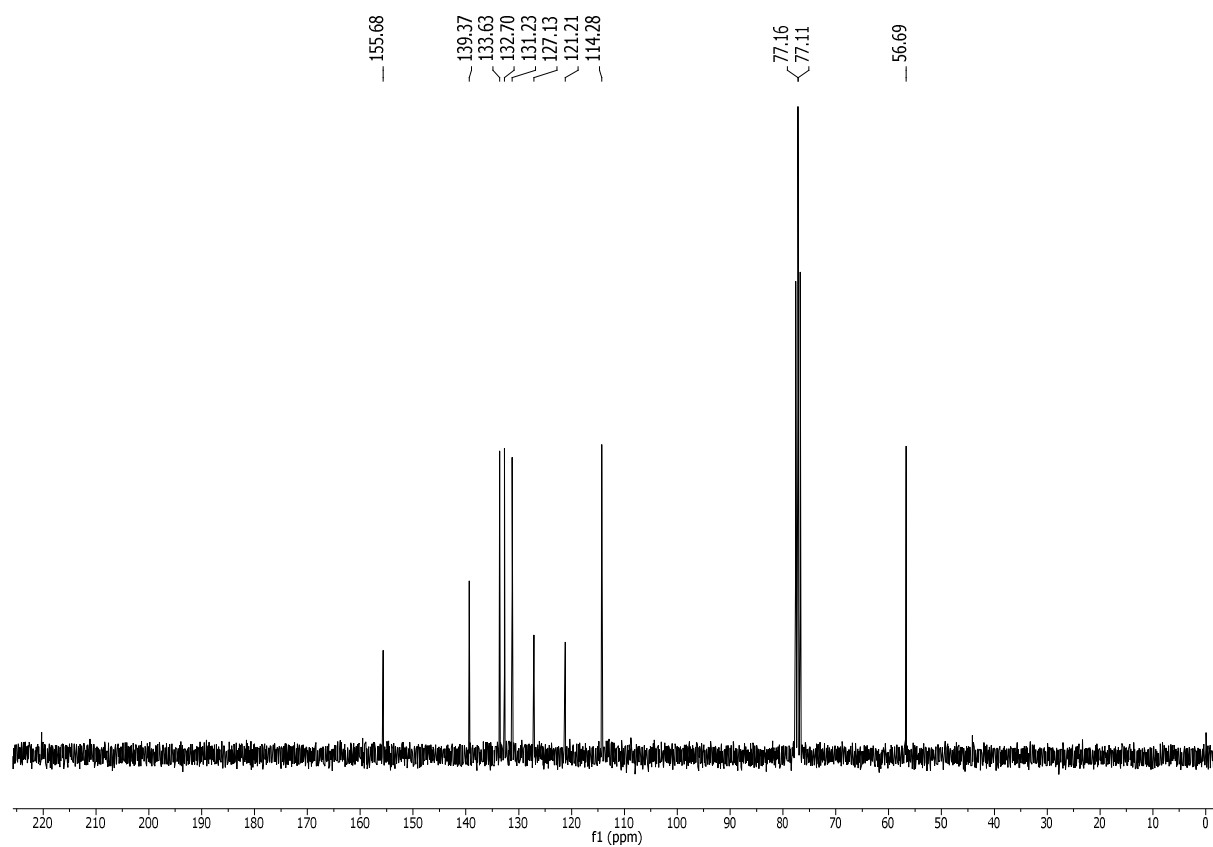

S84

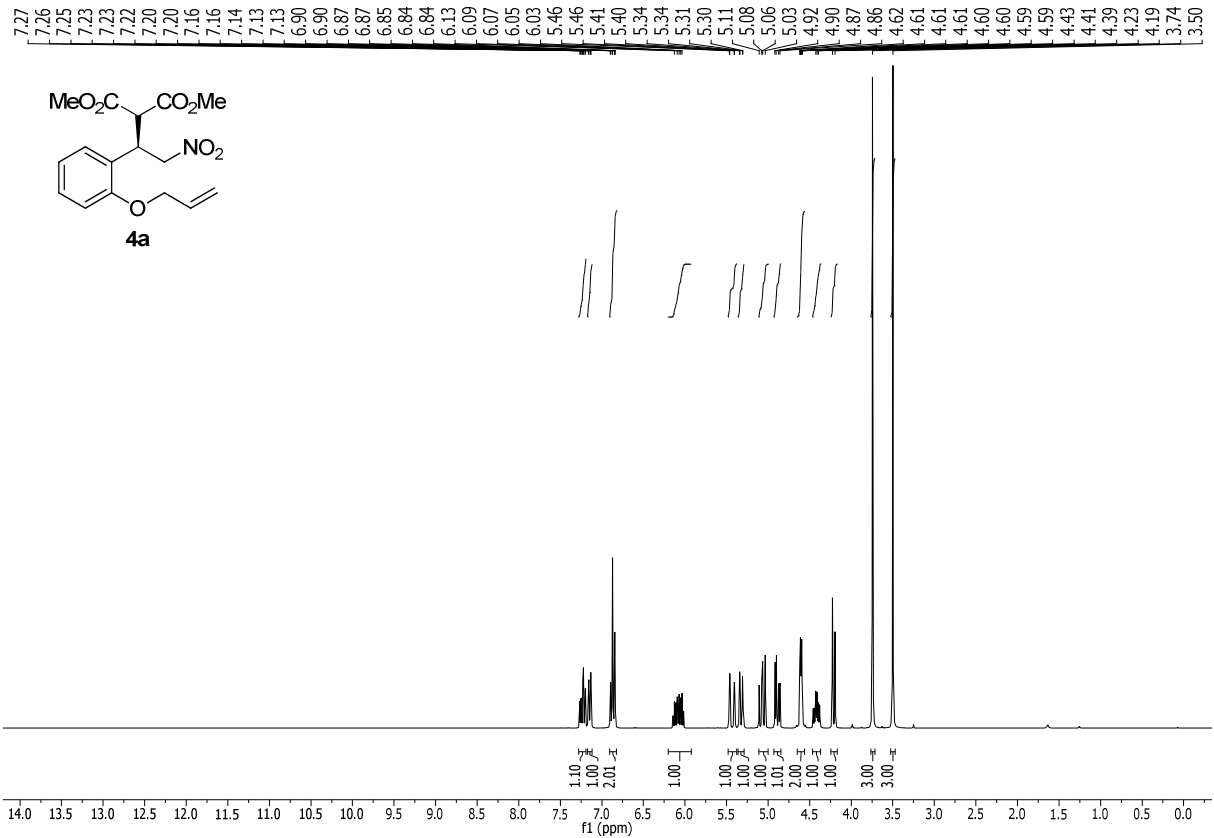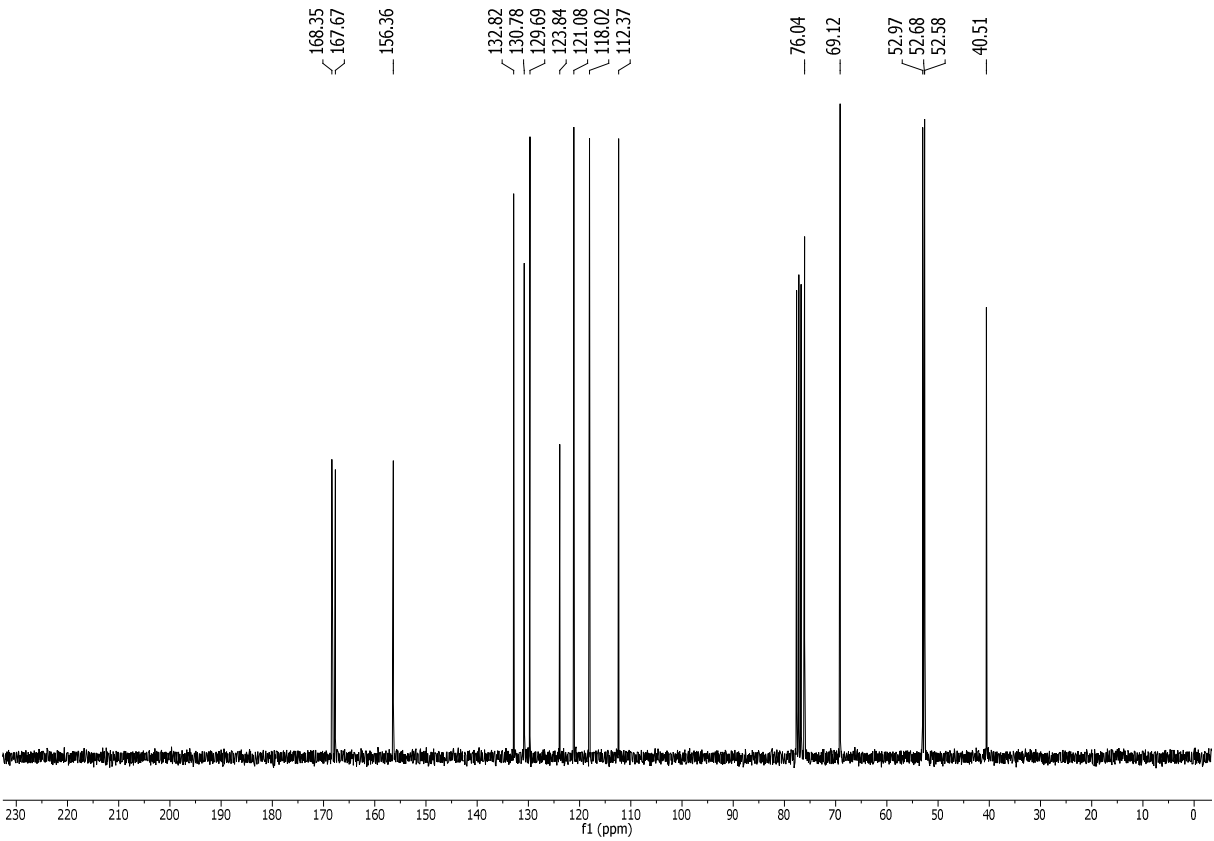



S85

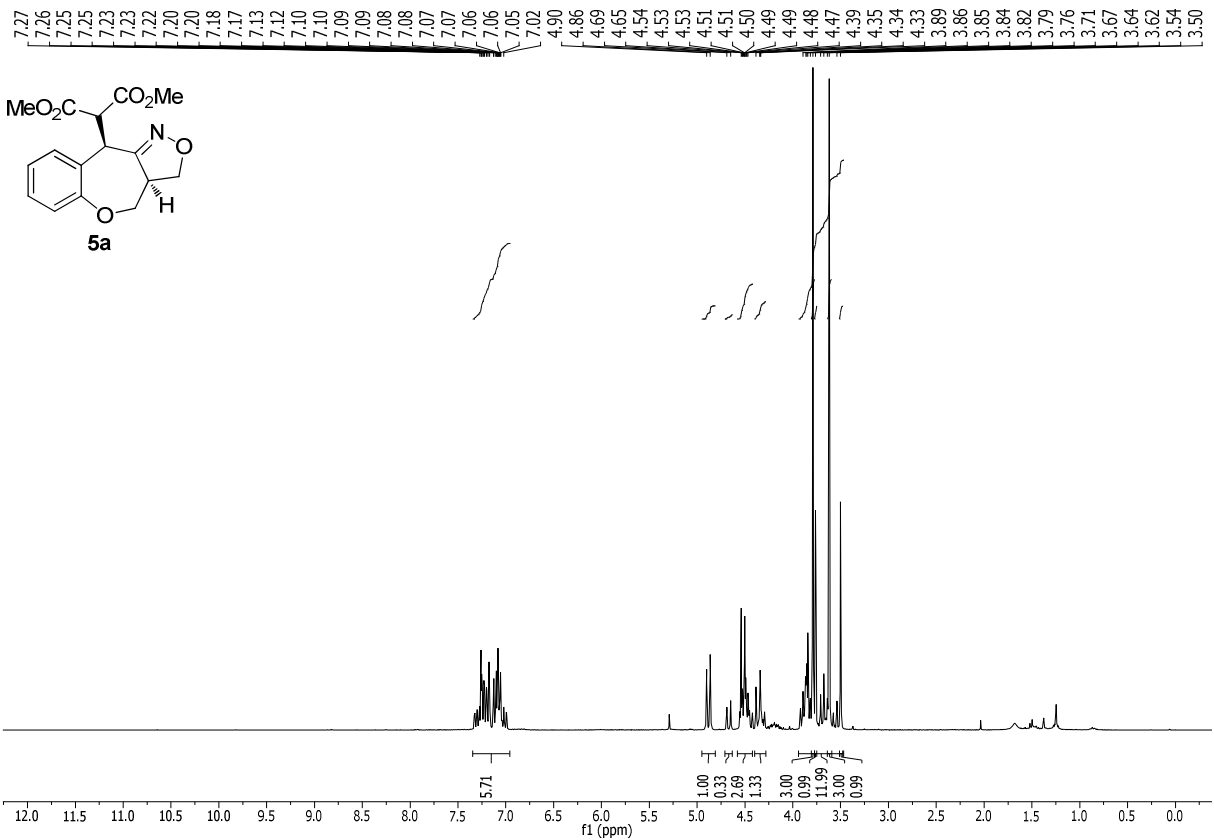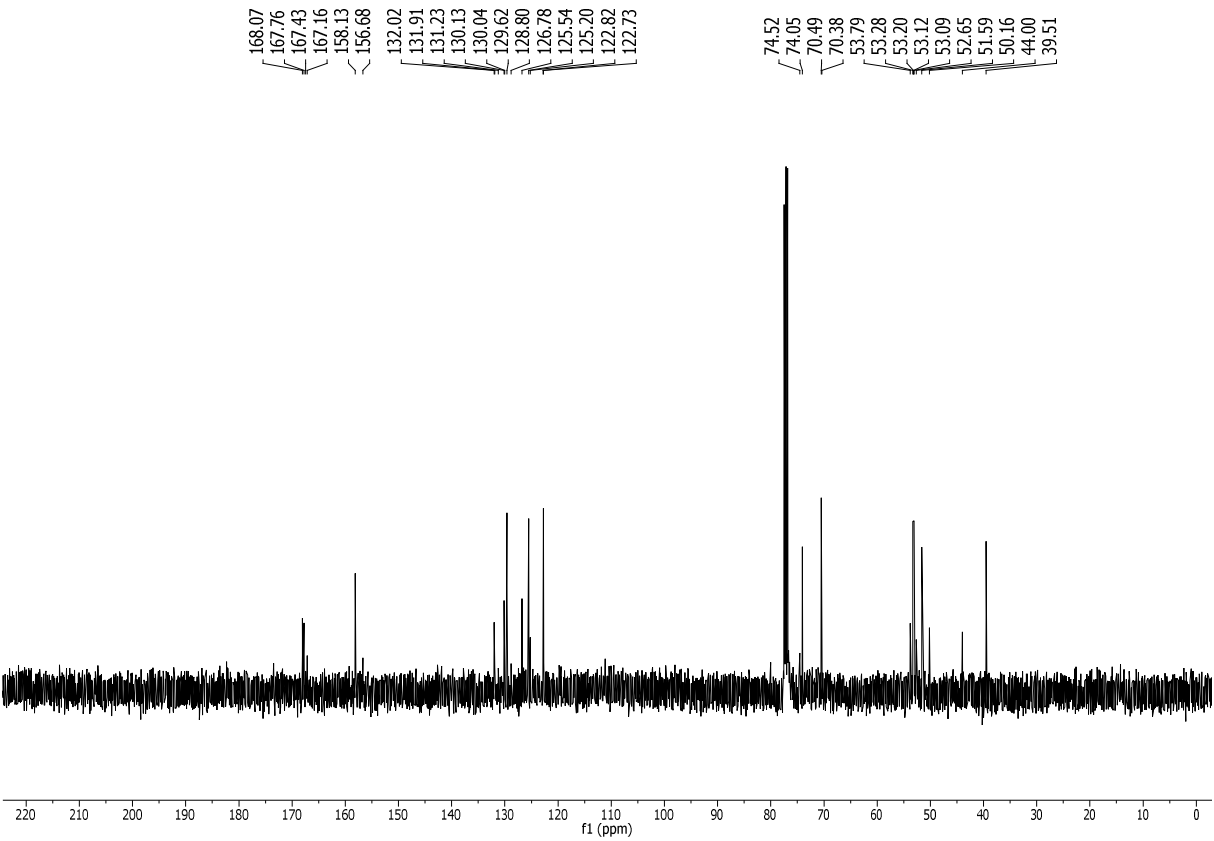

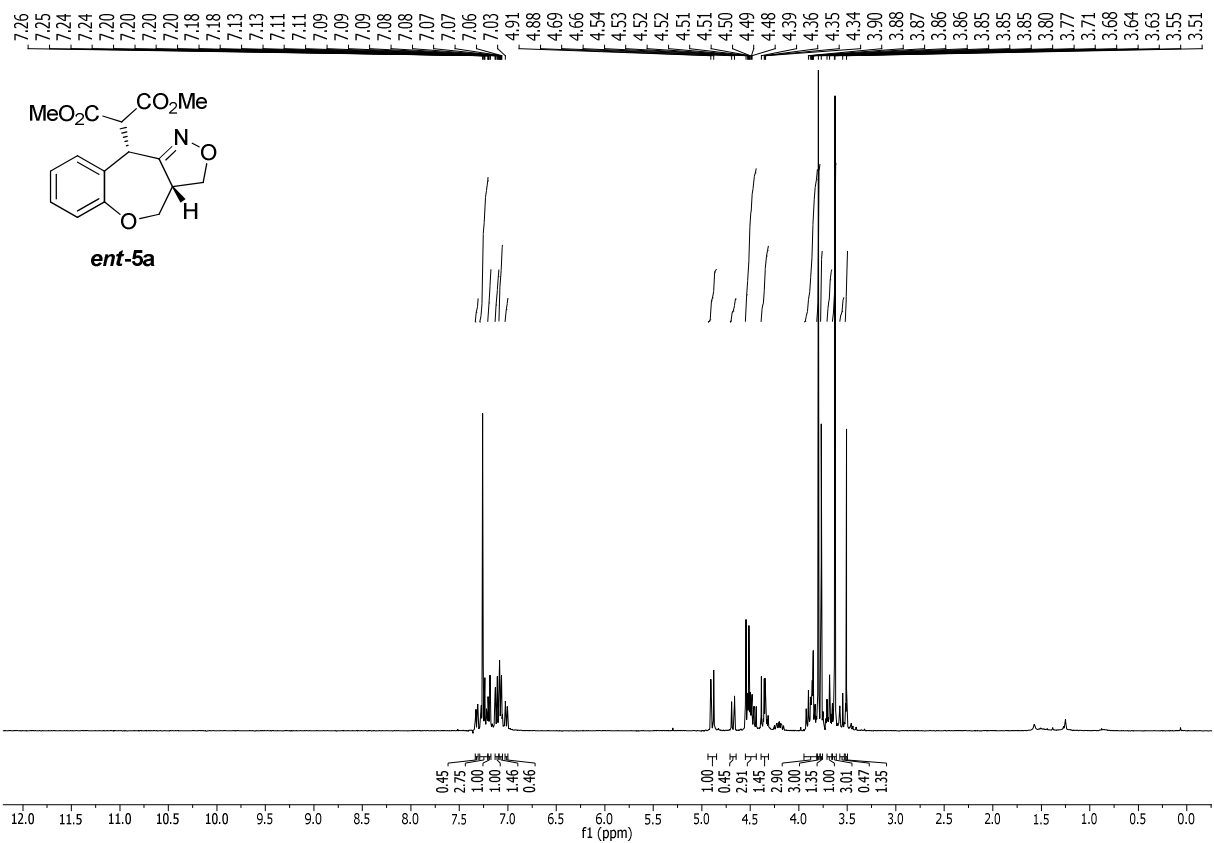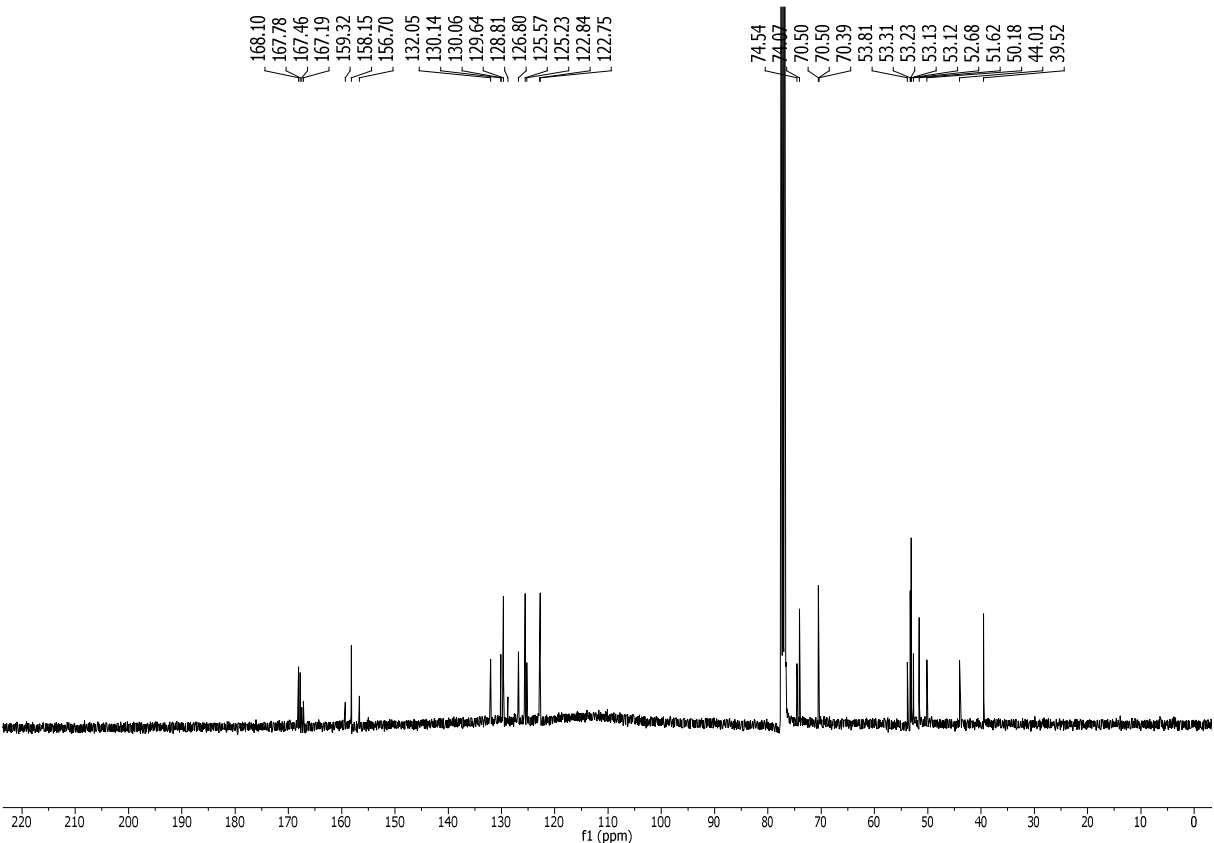

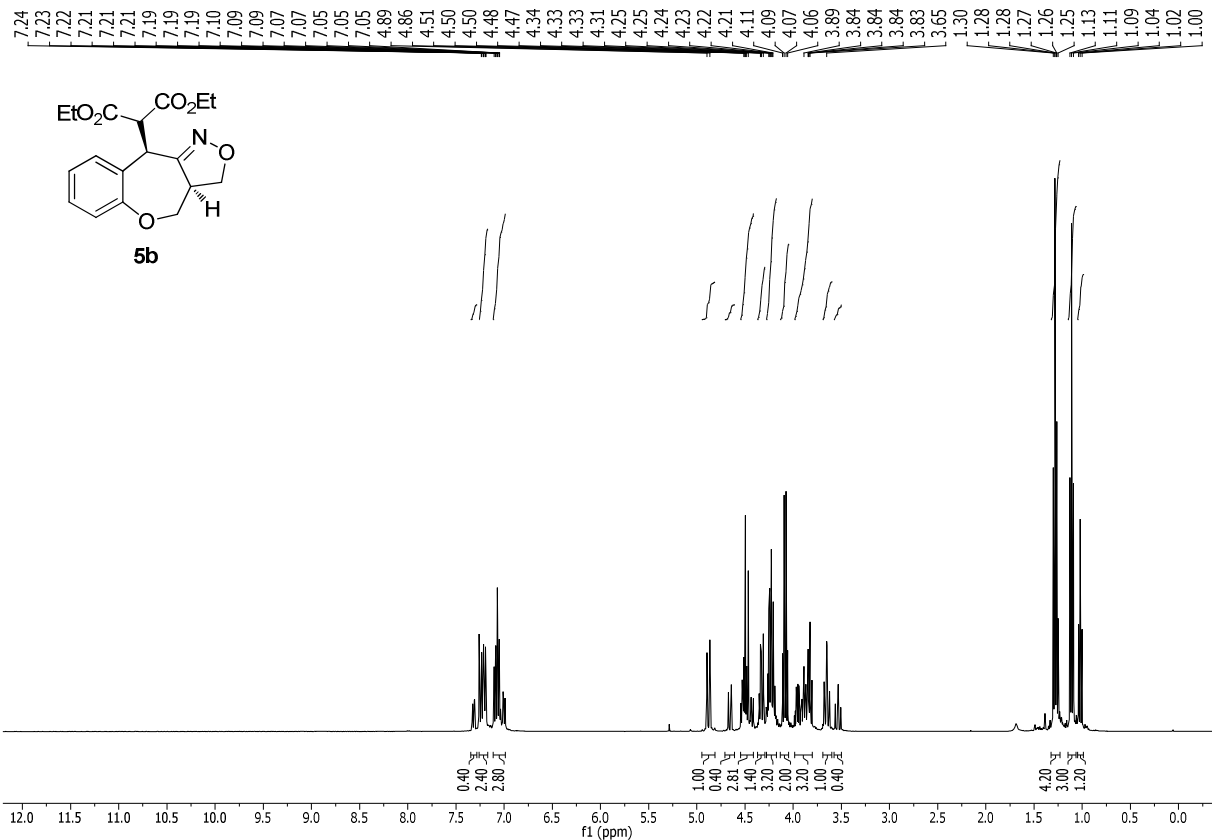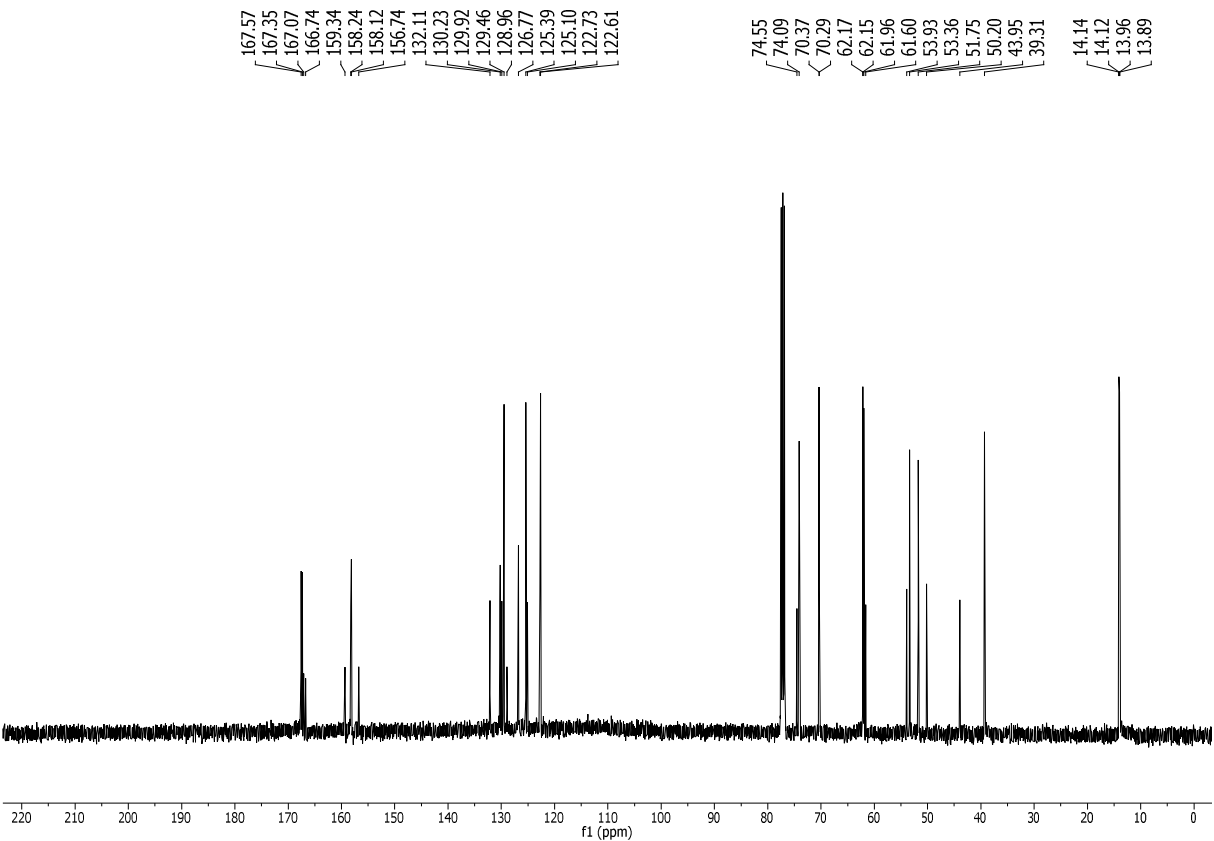

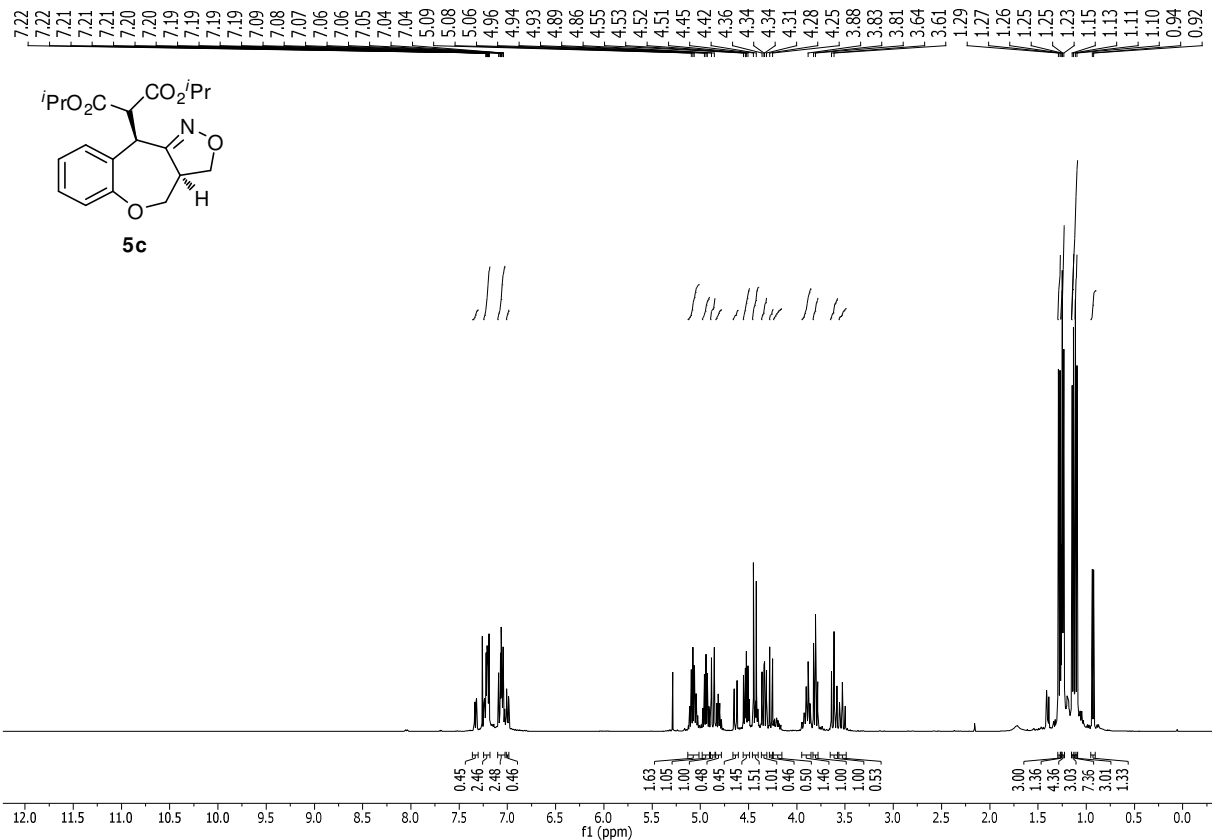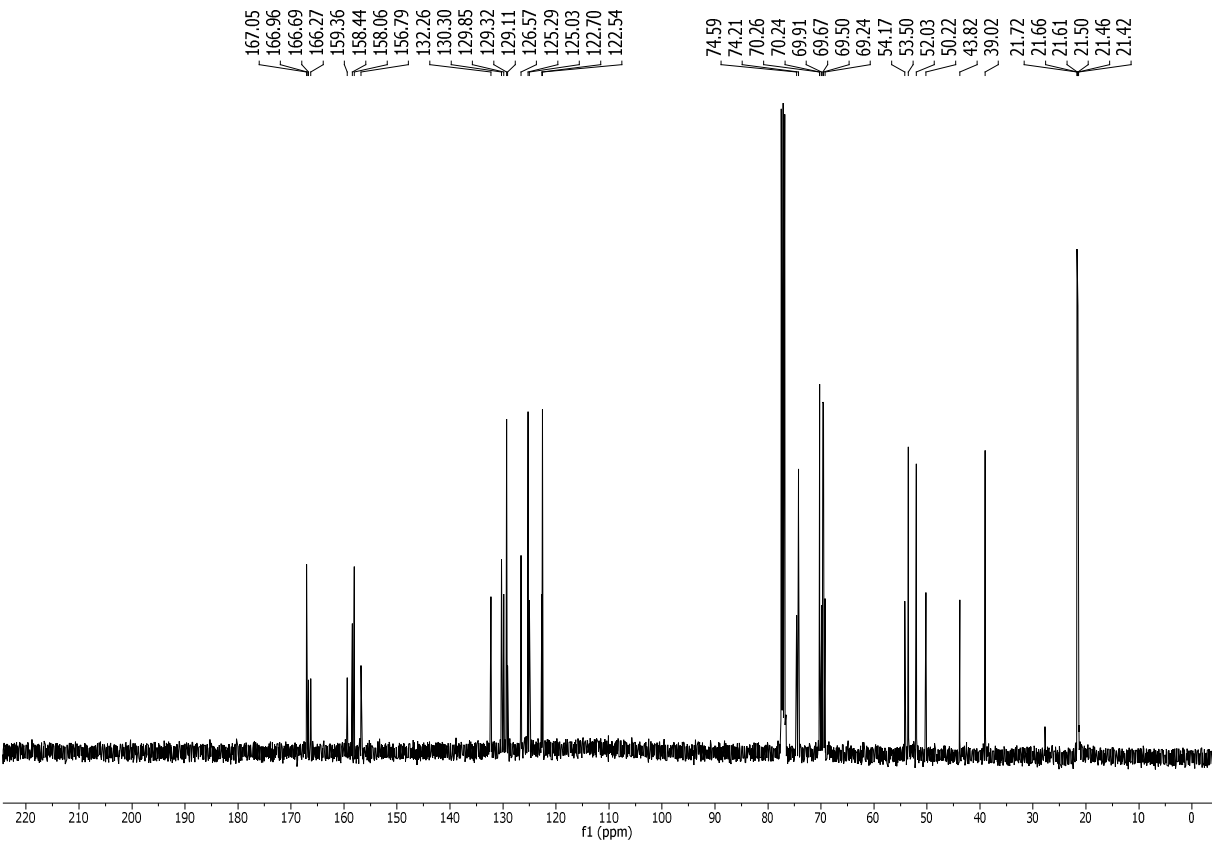

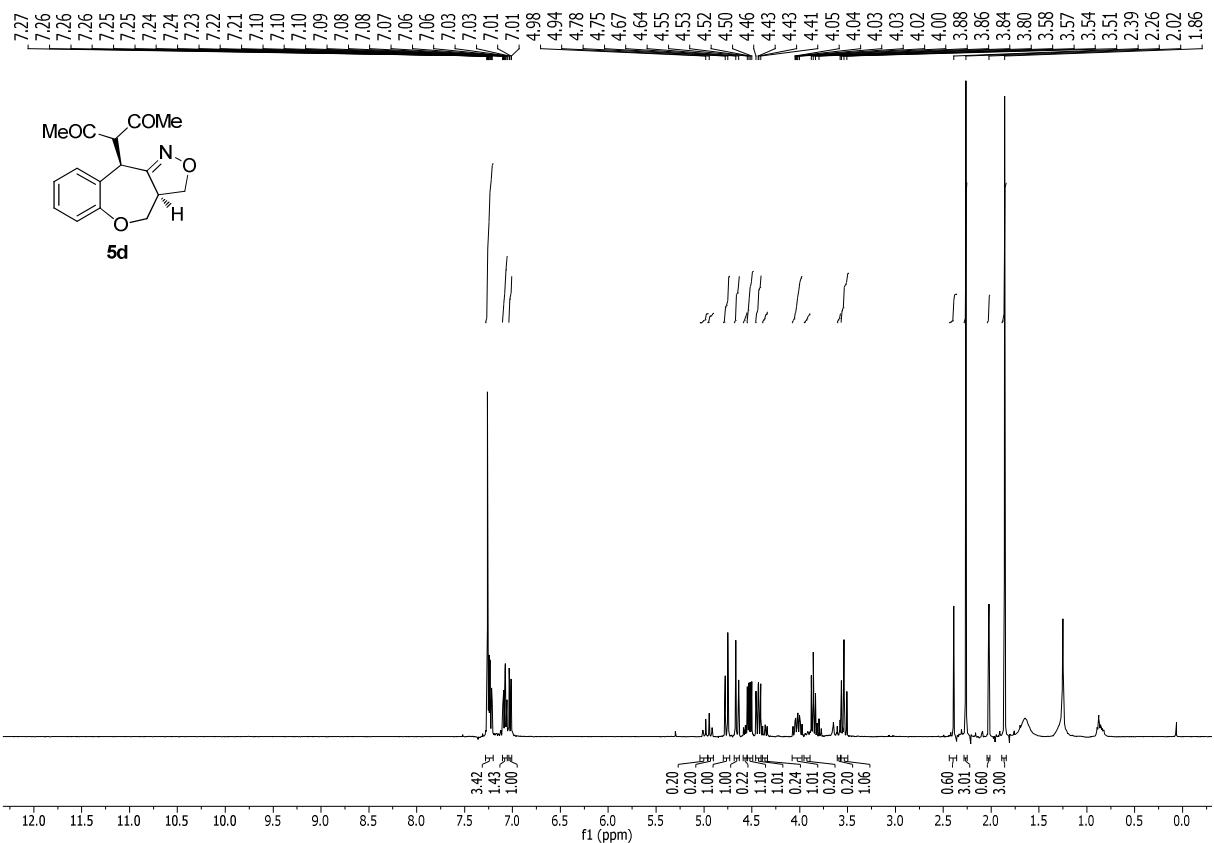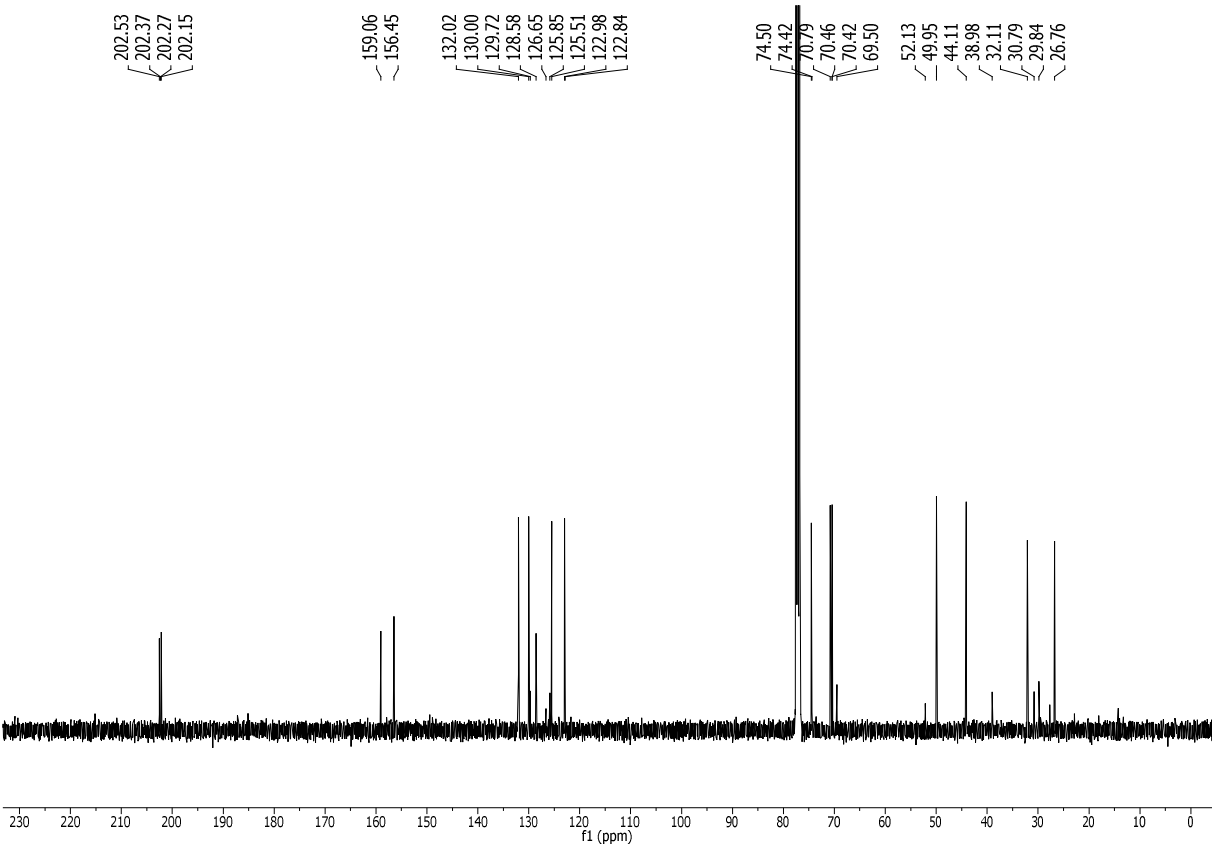

S90

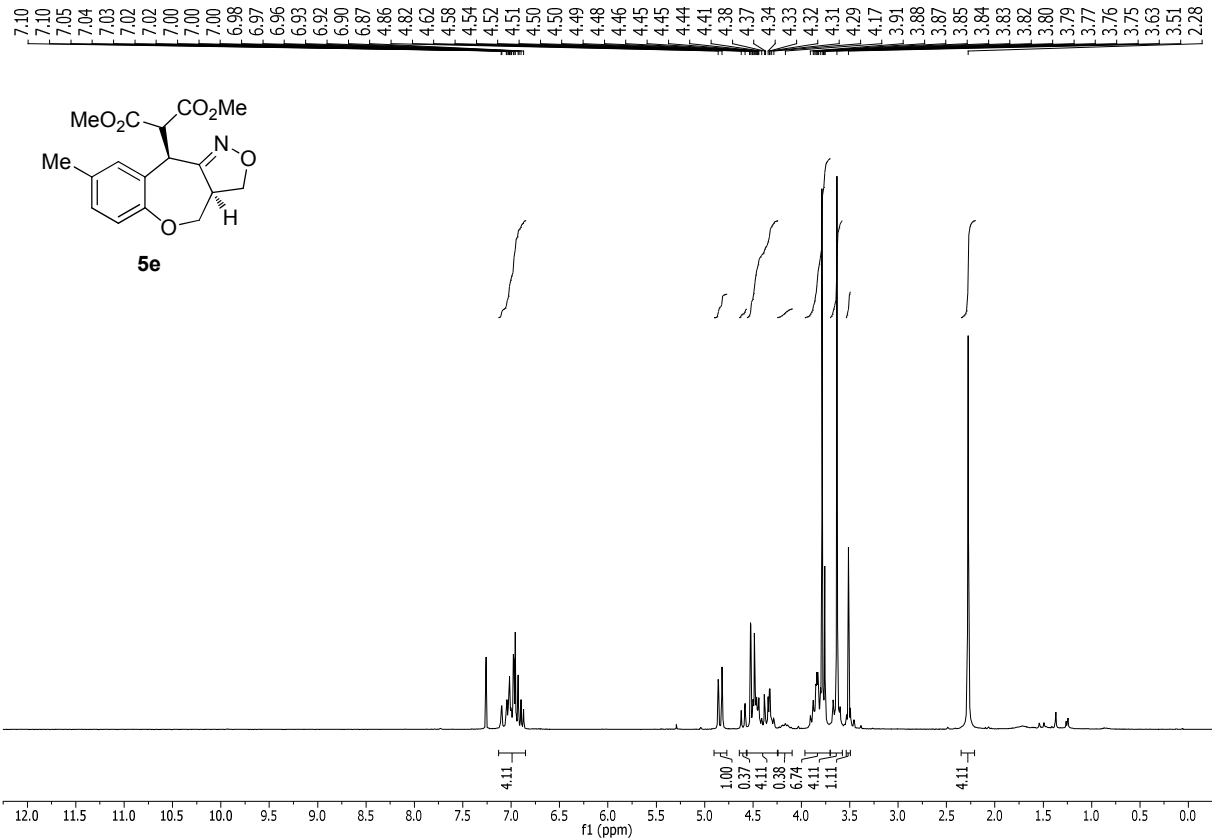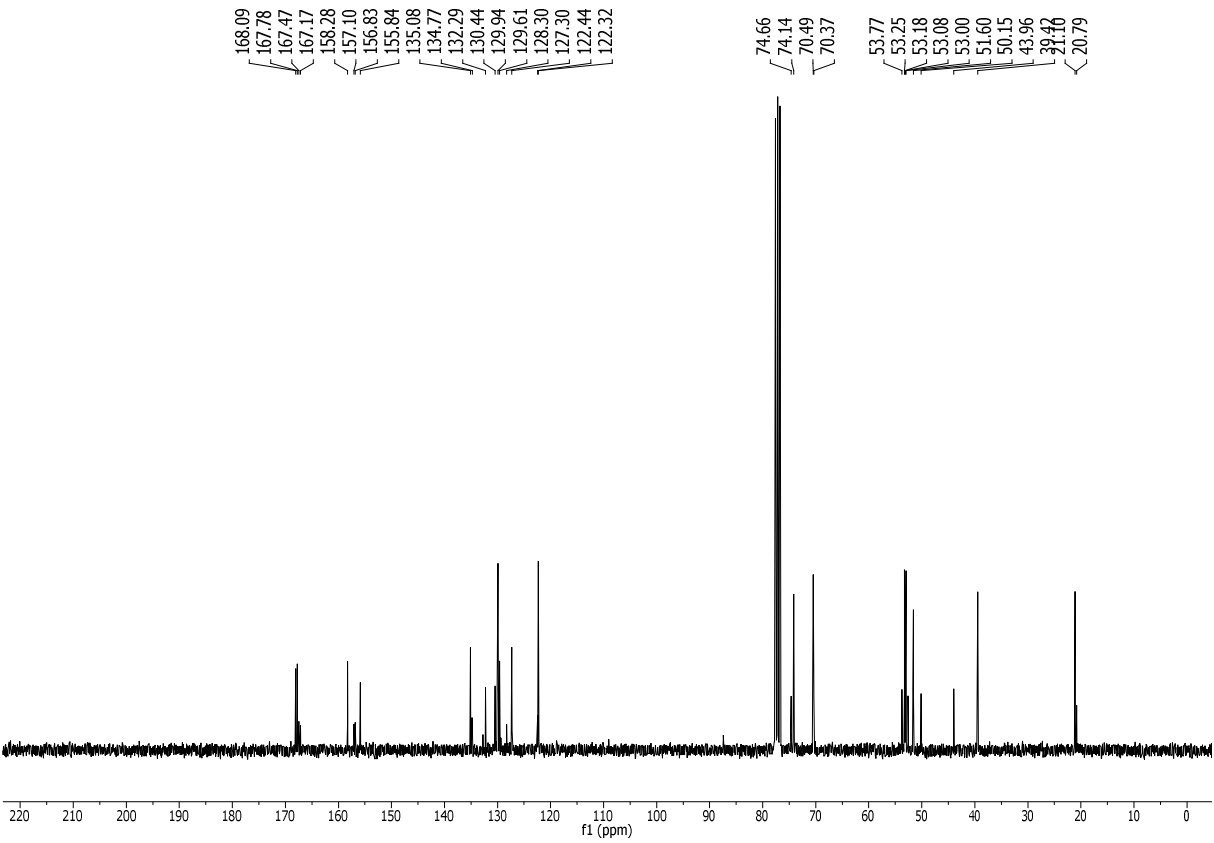

S91

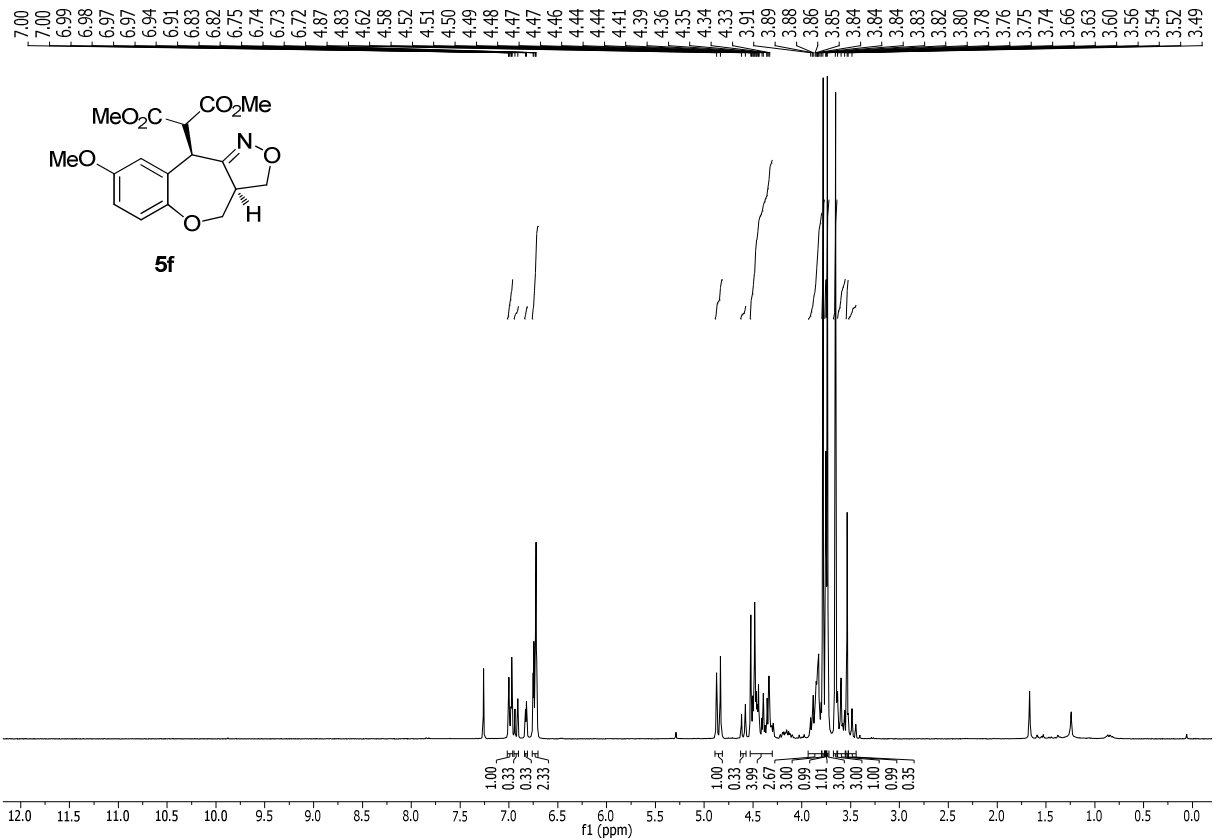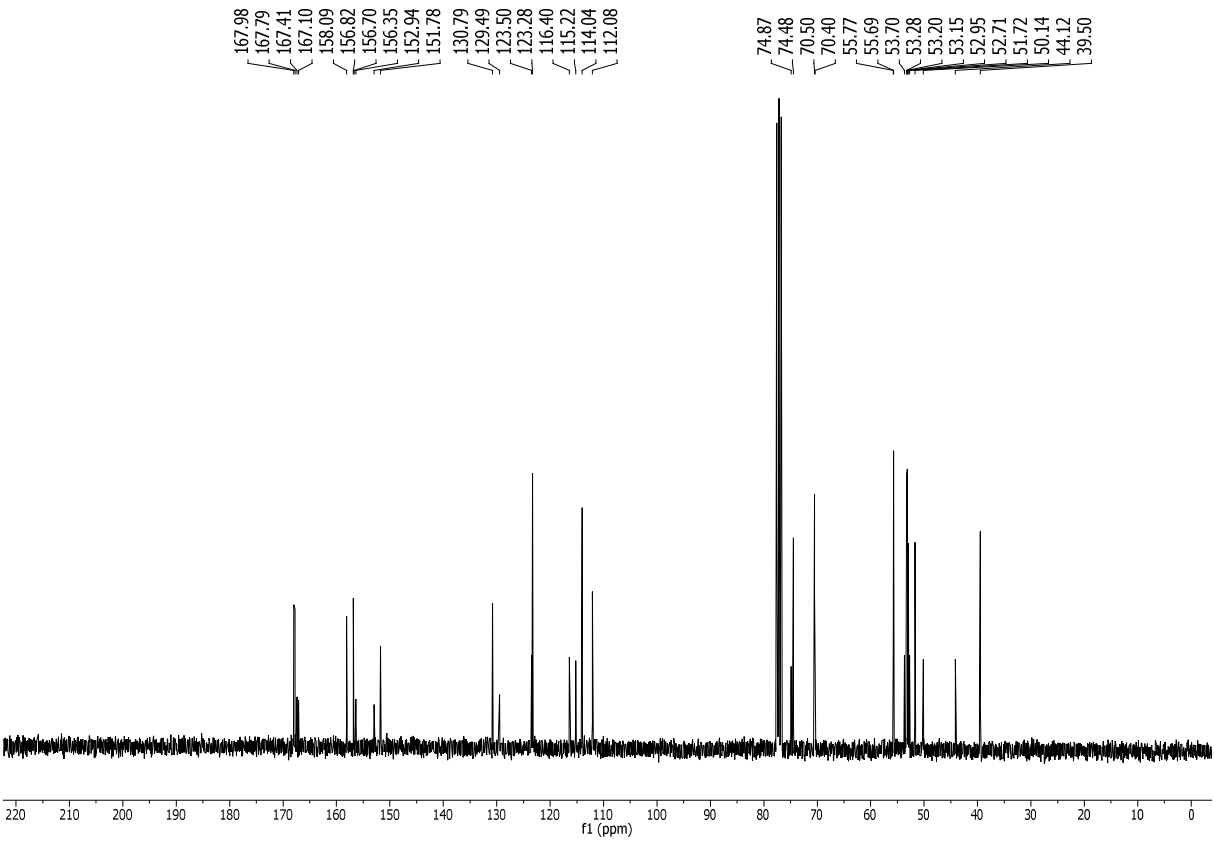

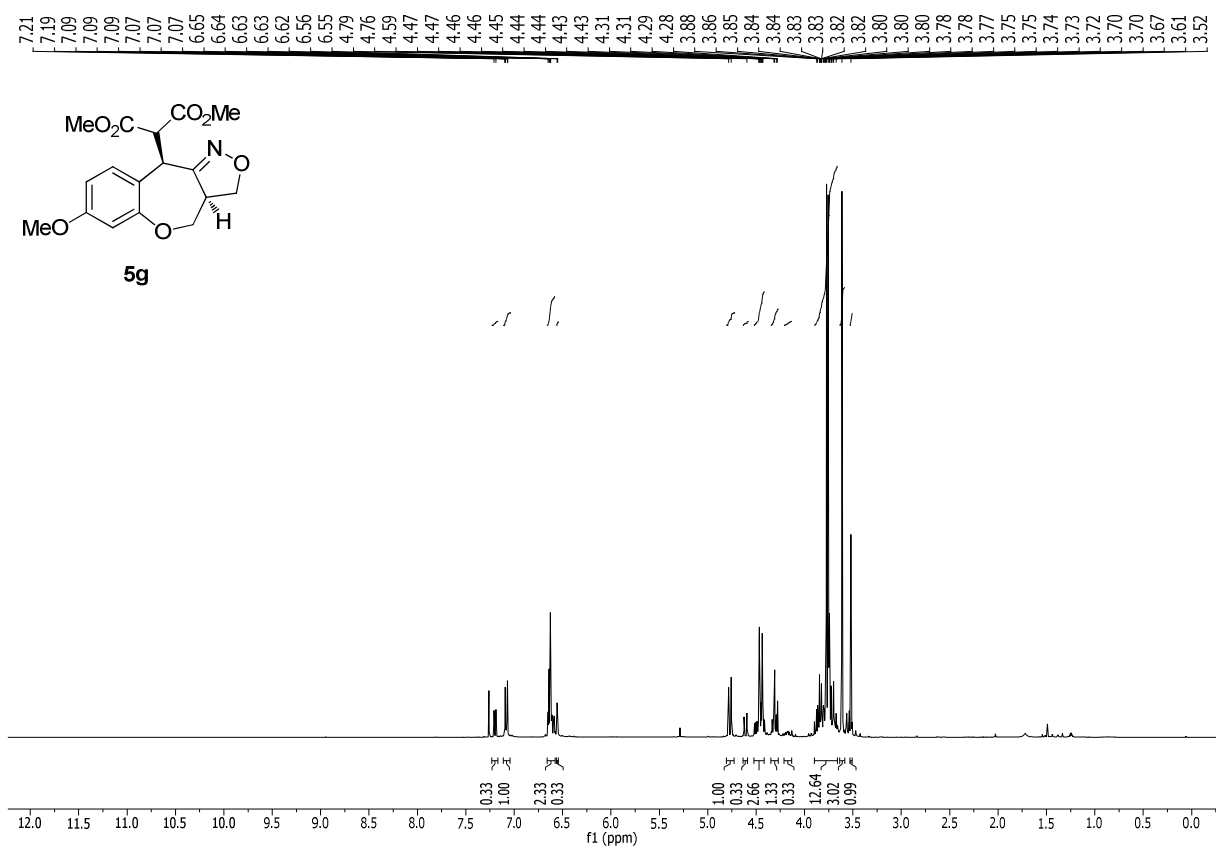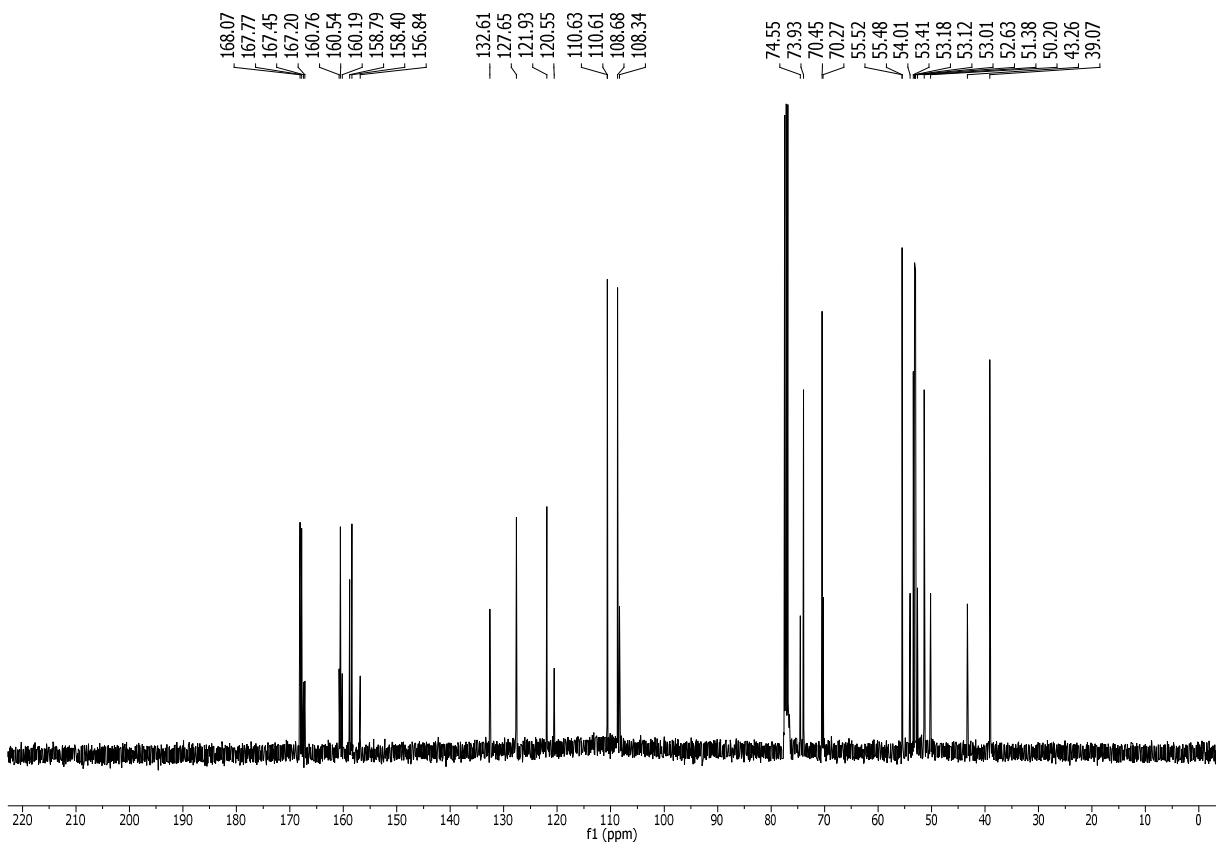



S93

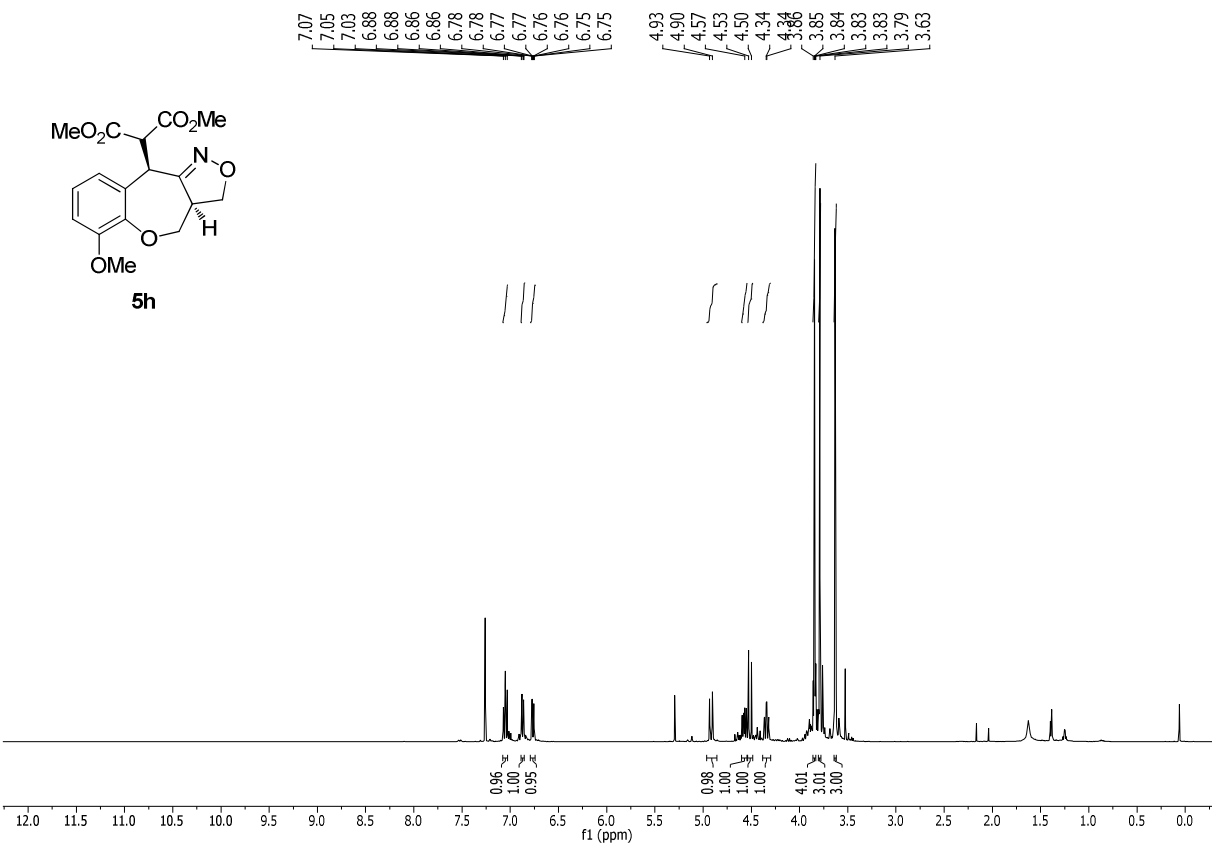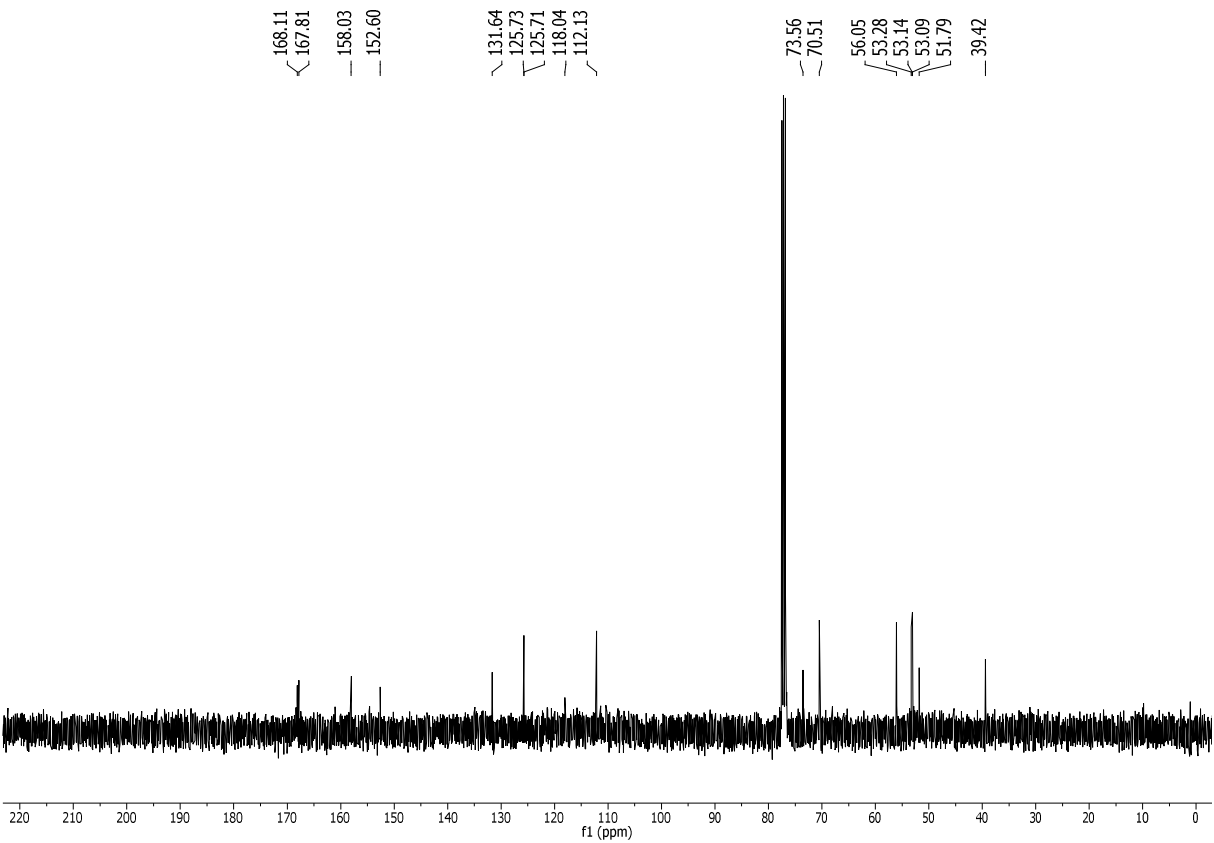

S94

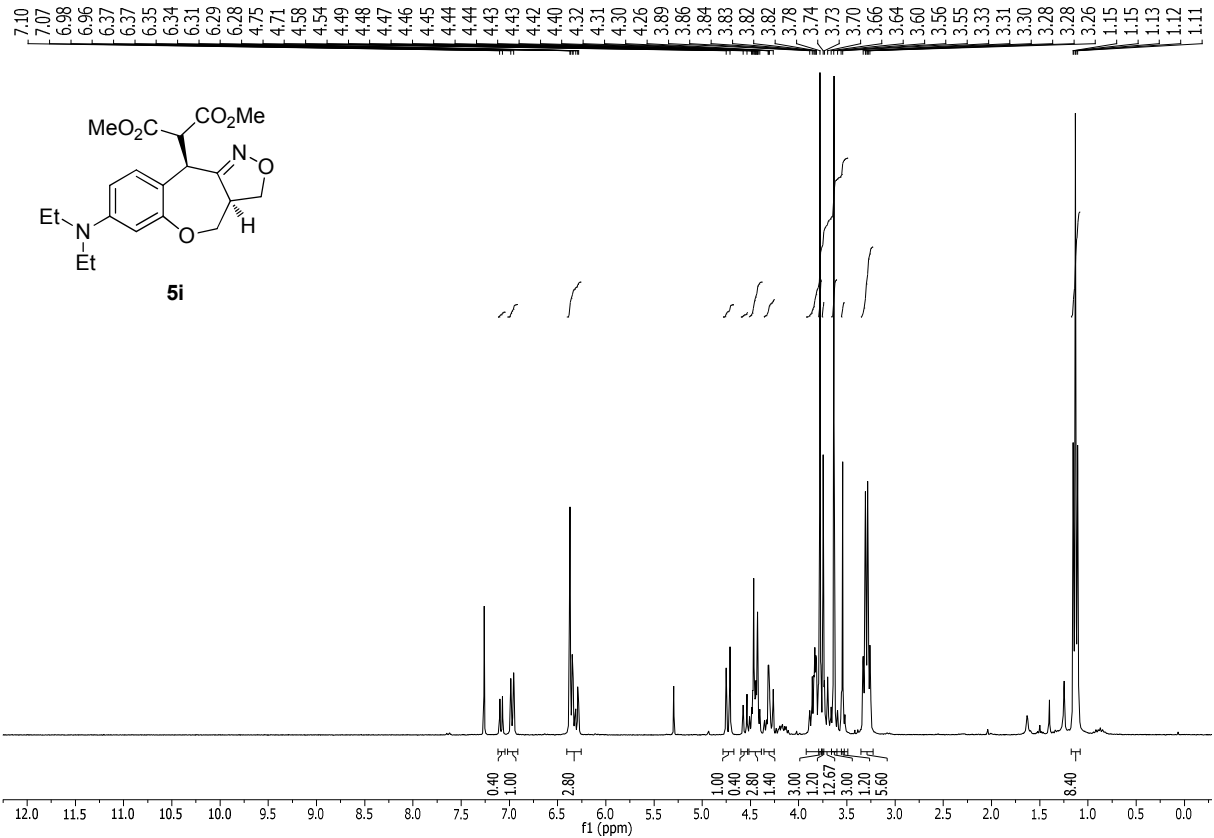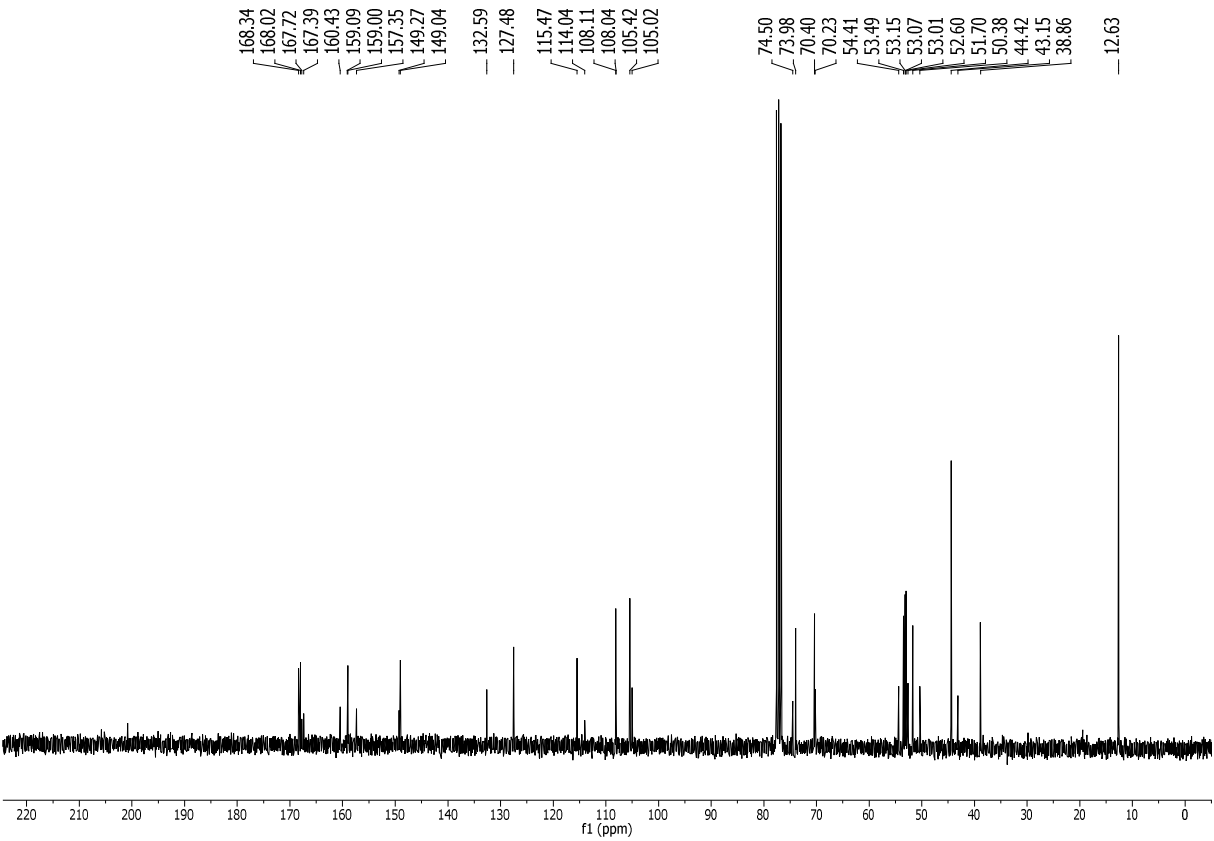

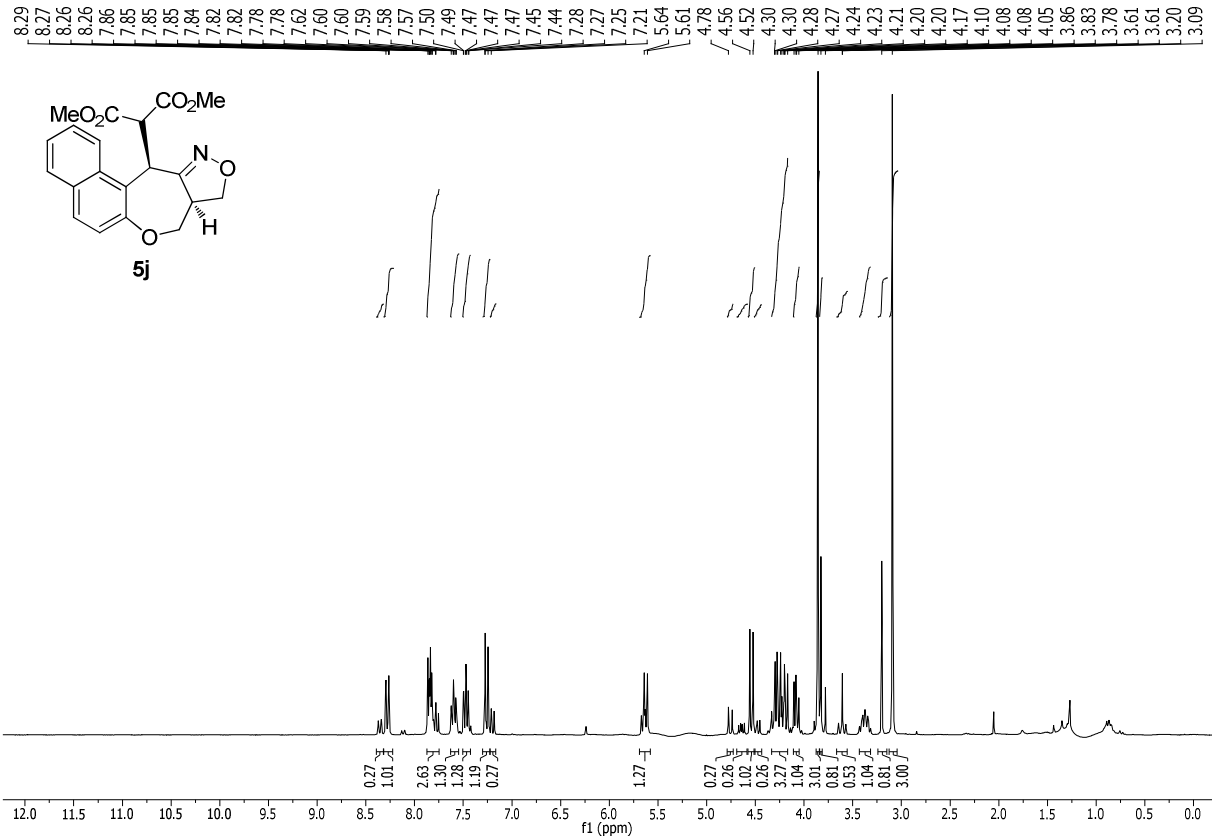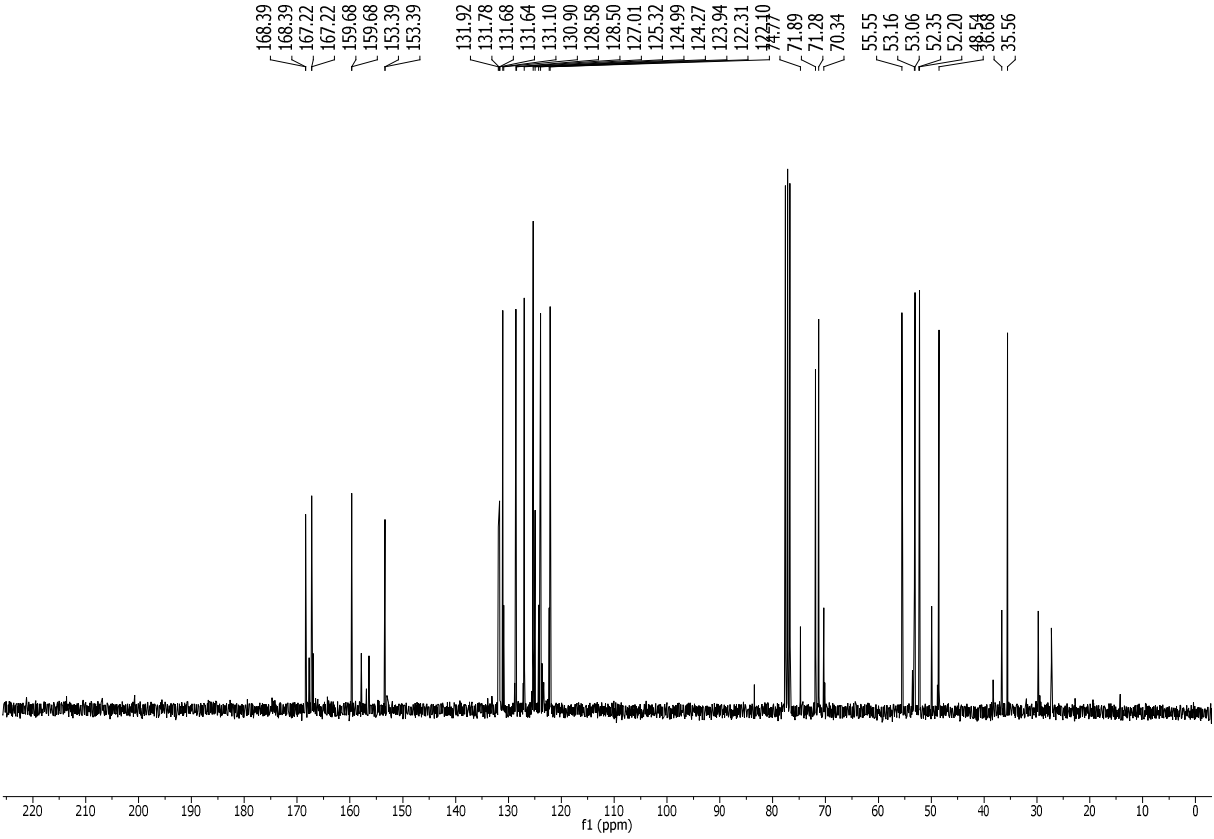

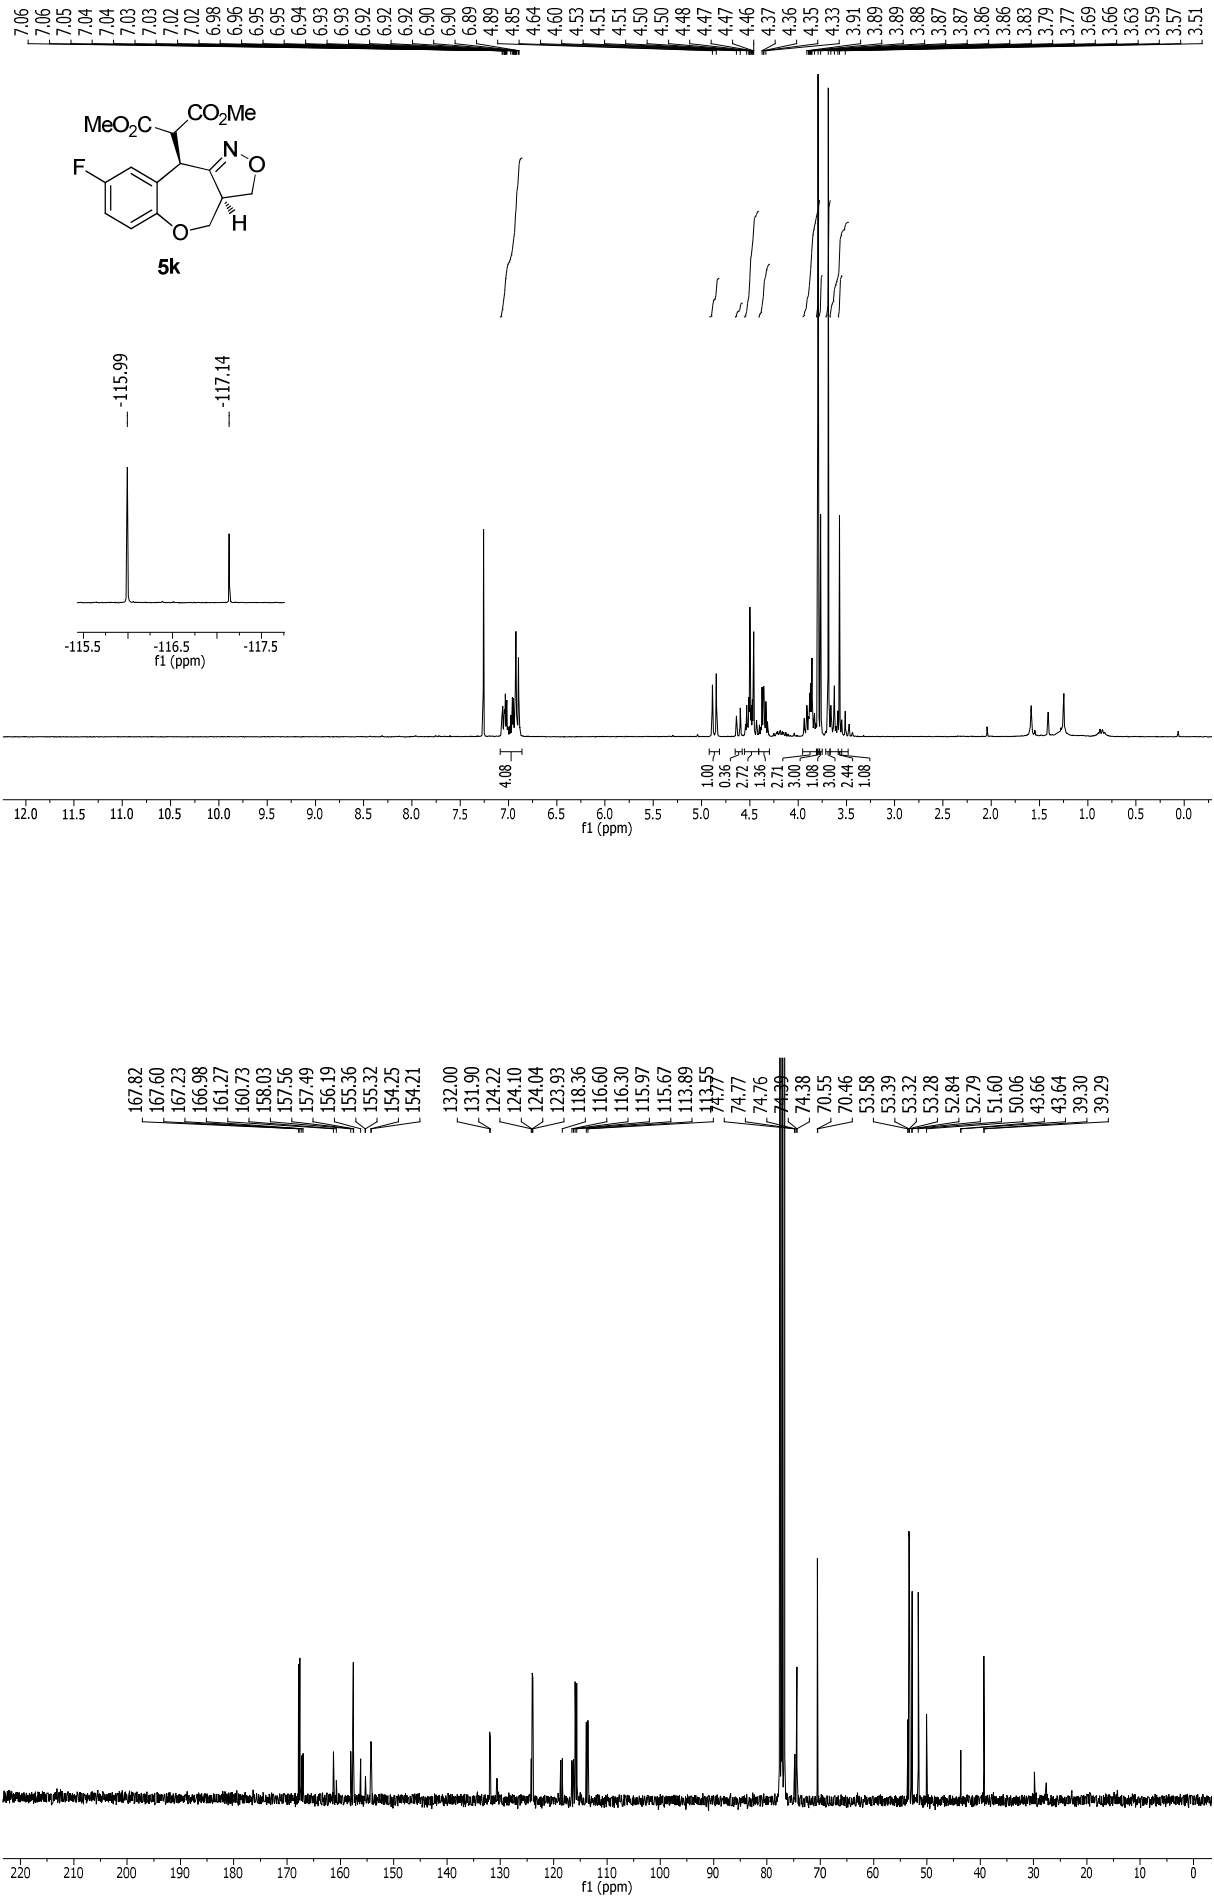

S97

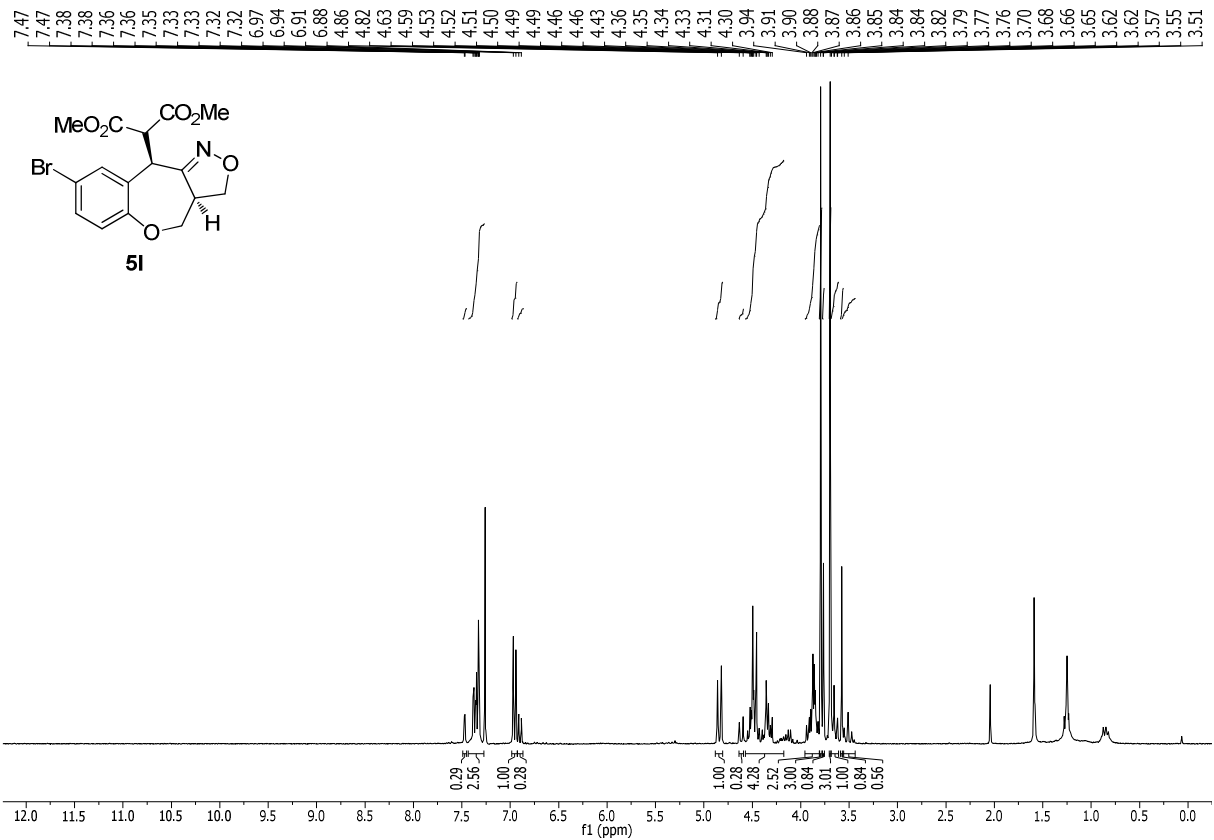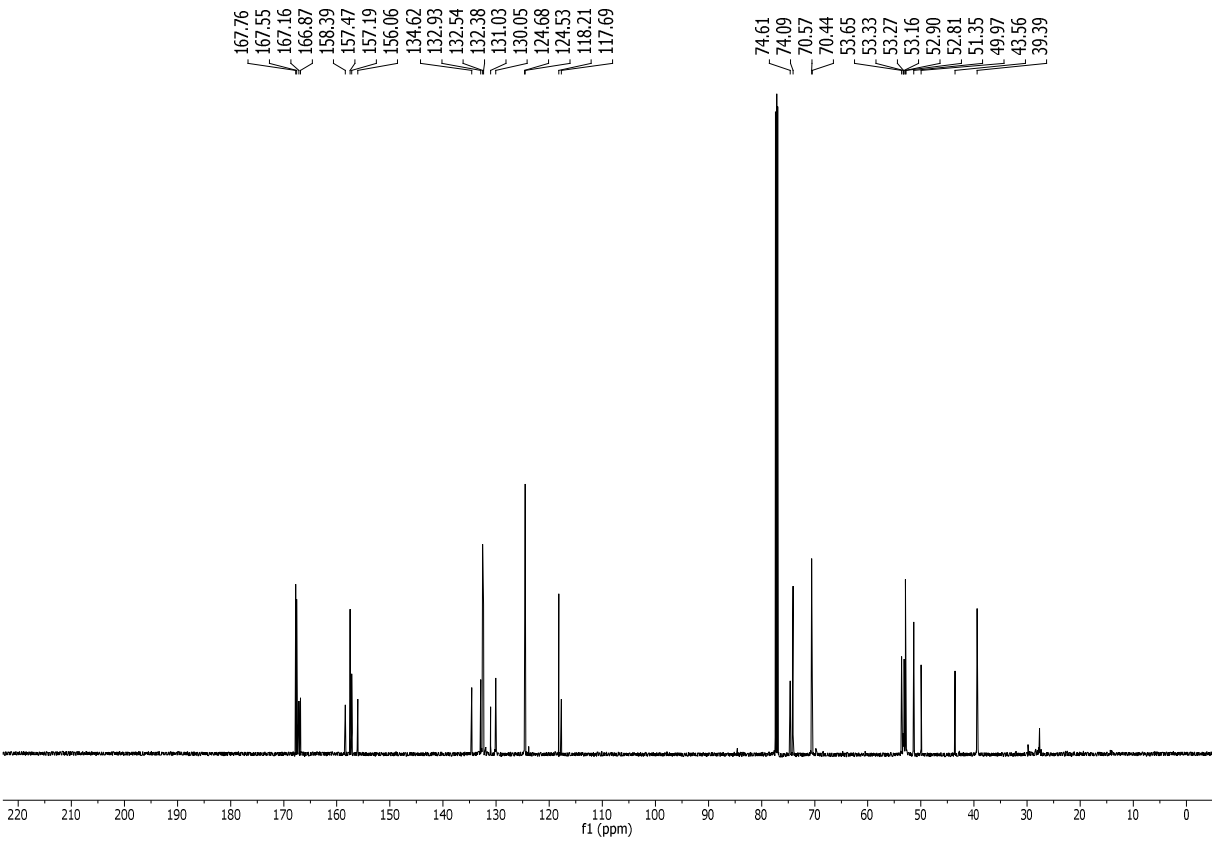

S98

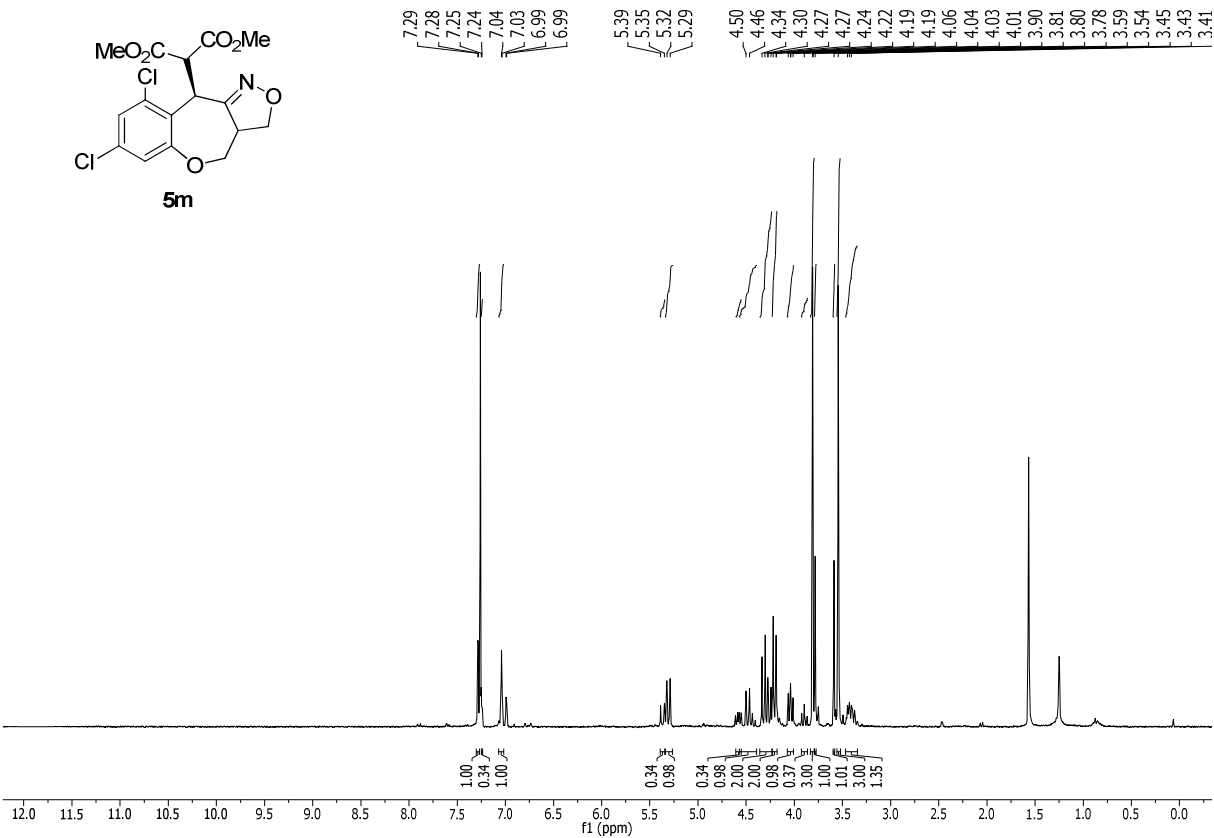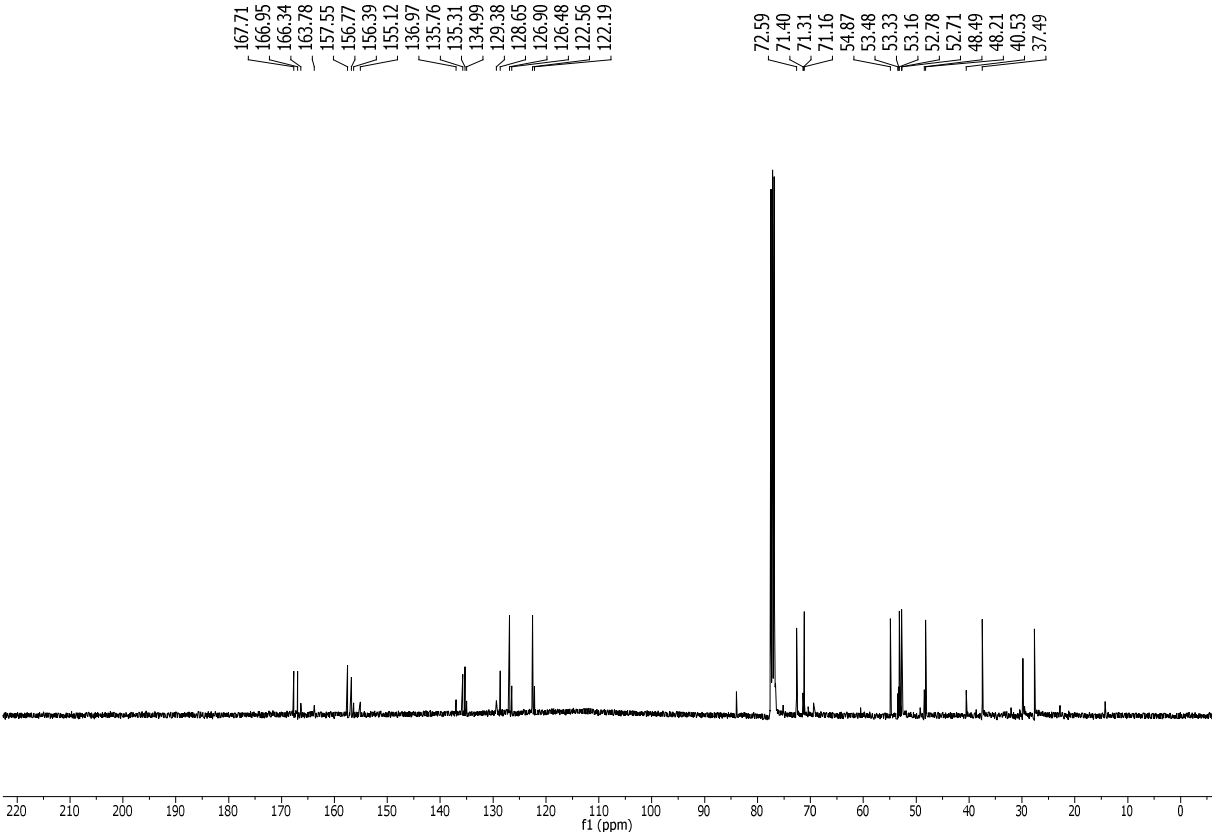

**5m** (major isomer):

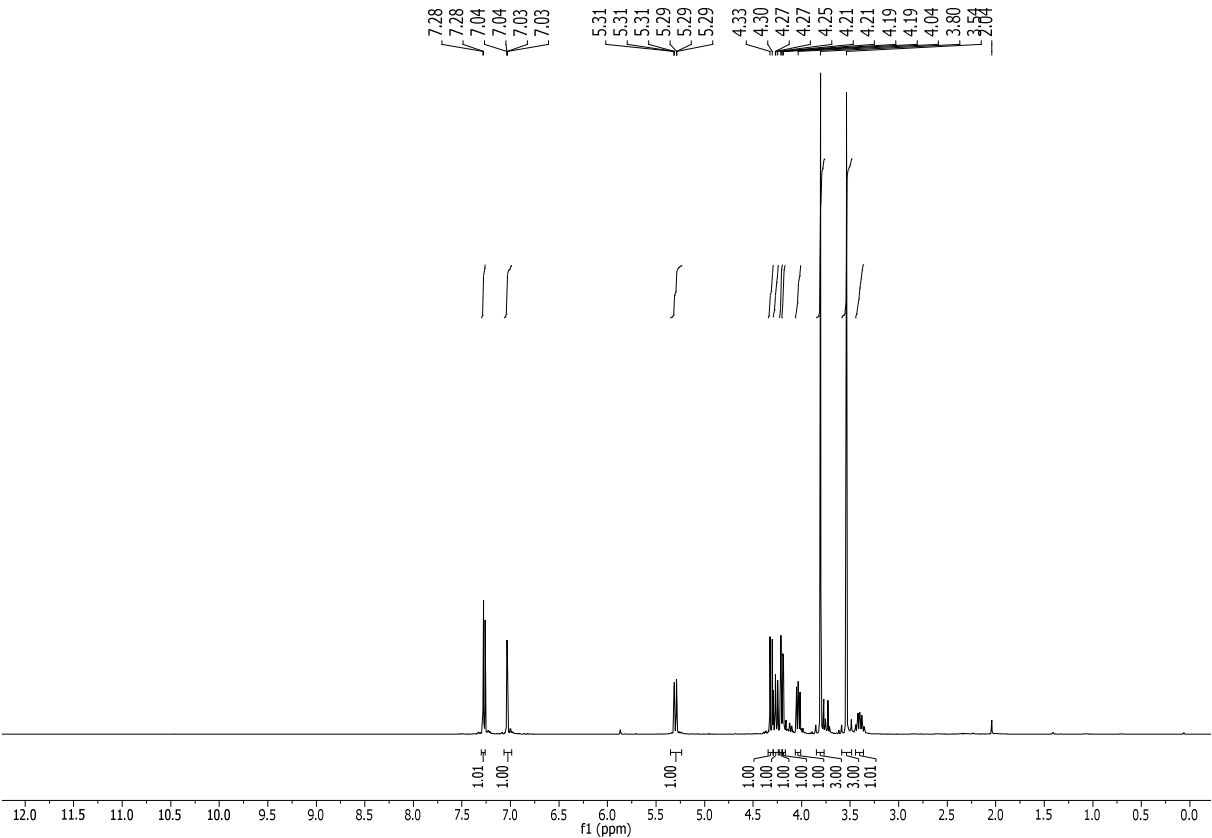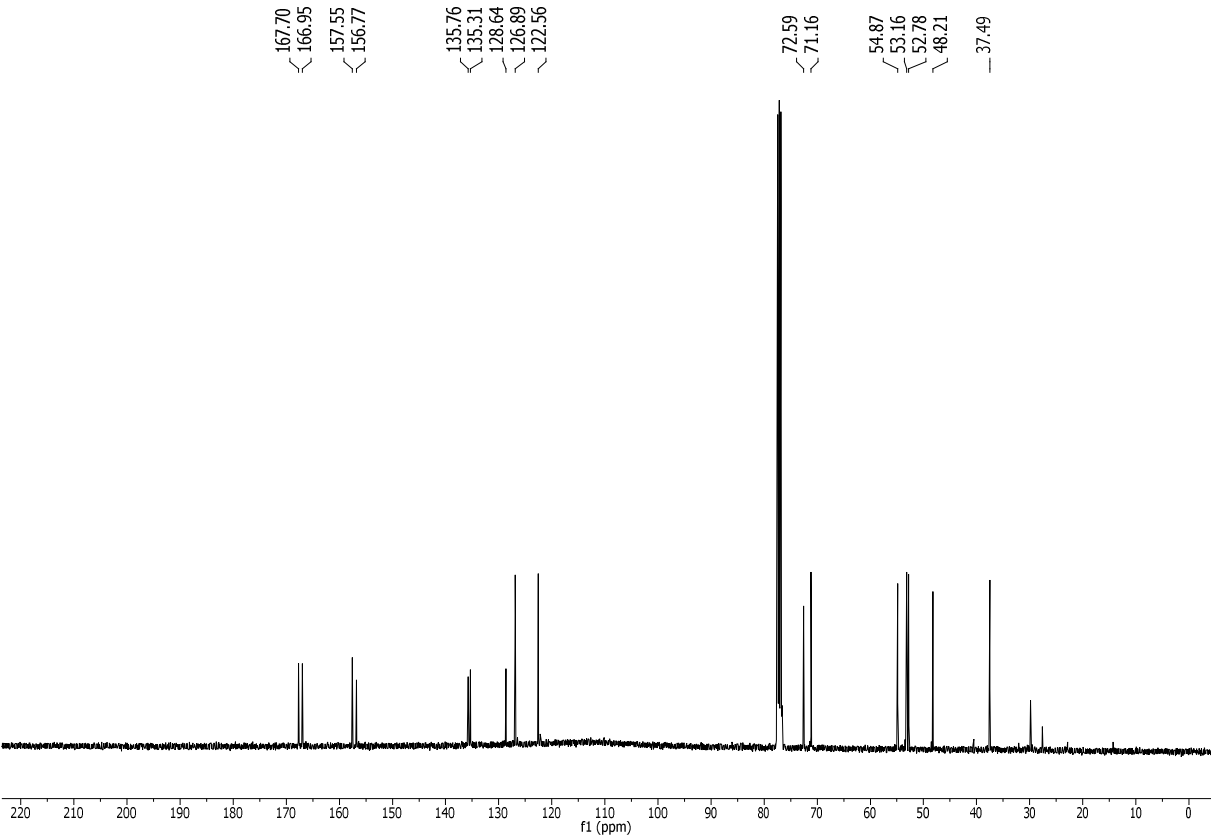

S100

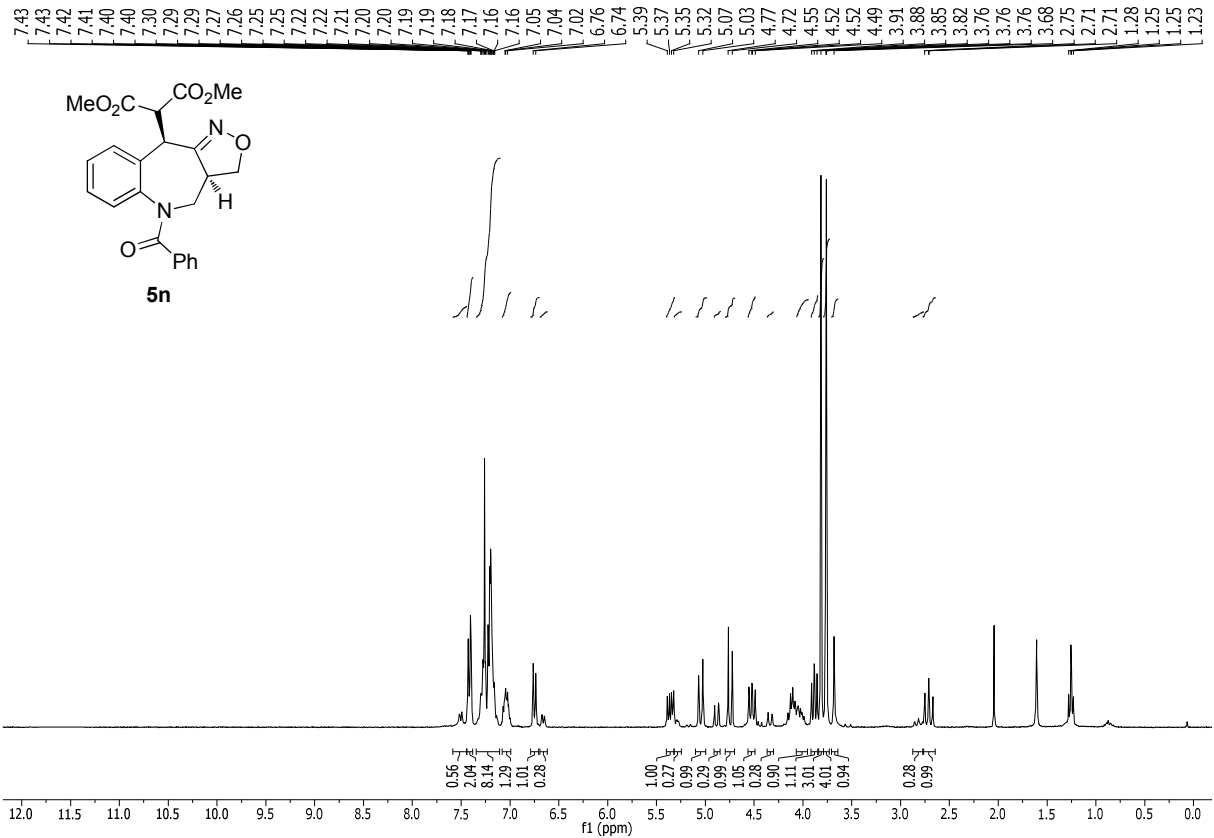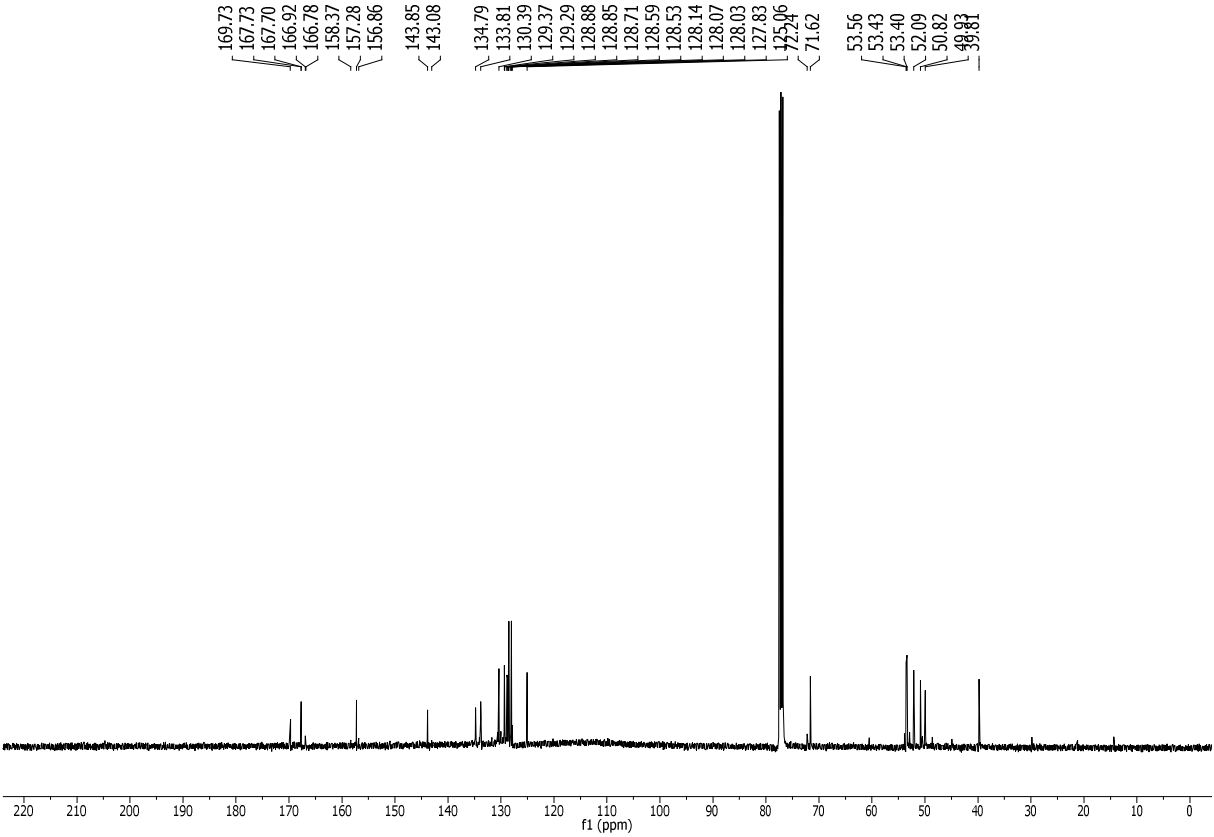



S101

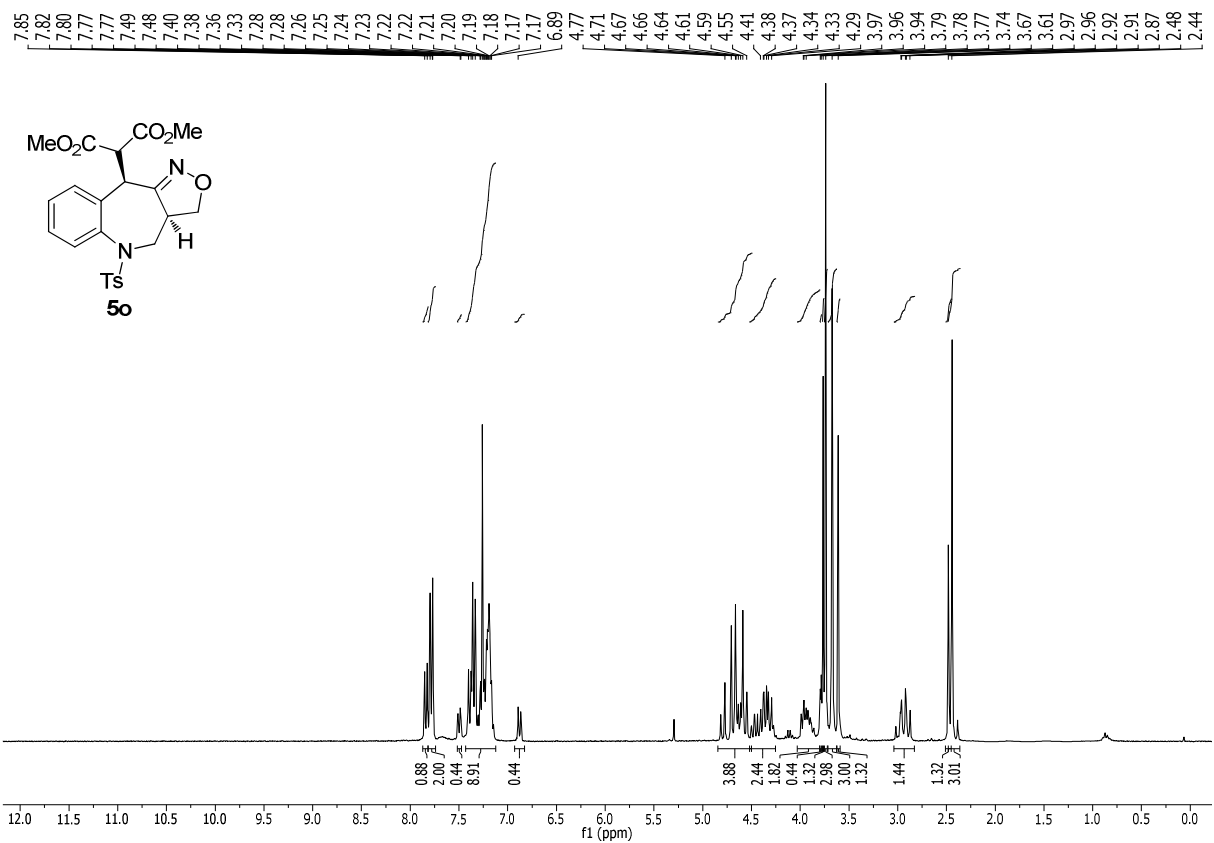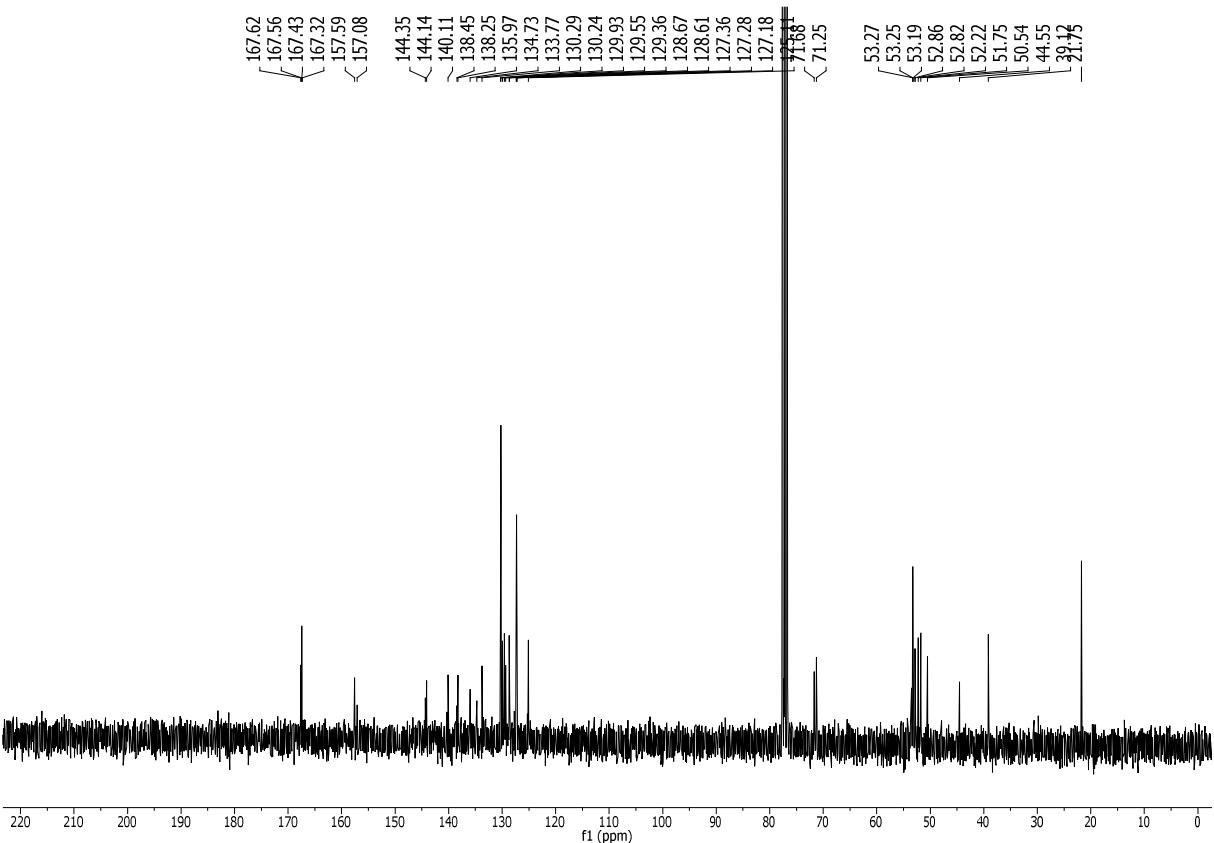

S102

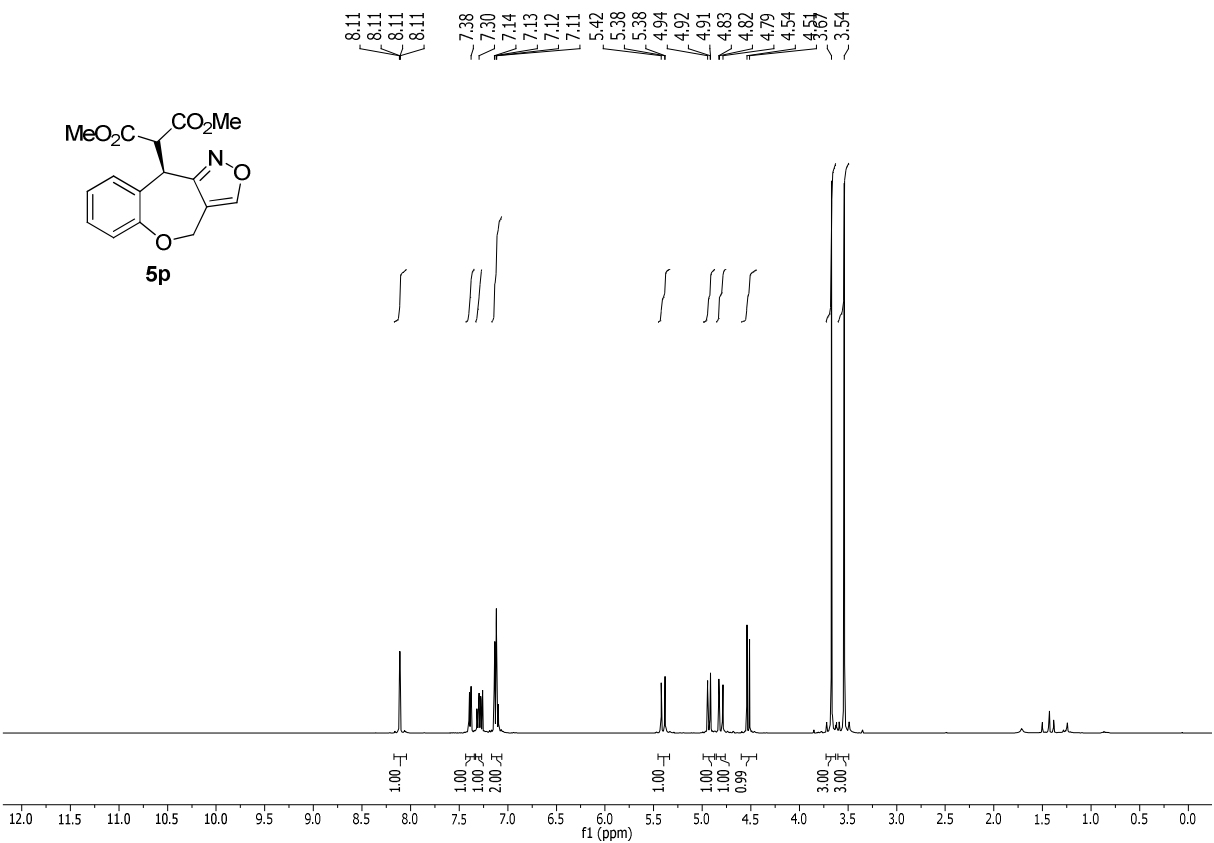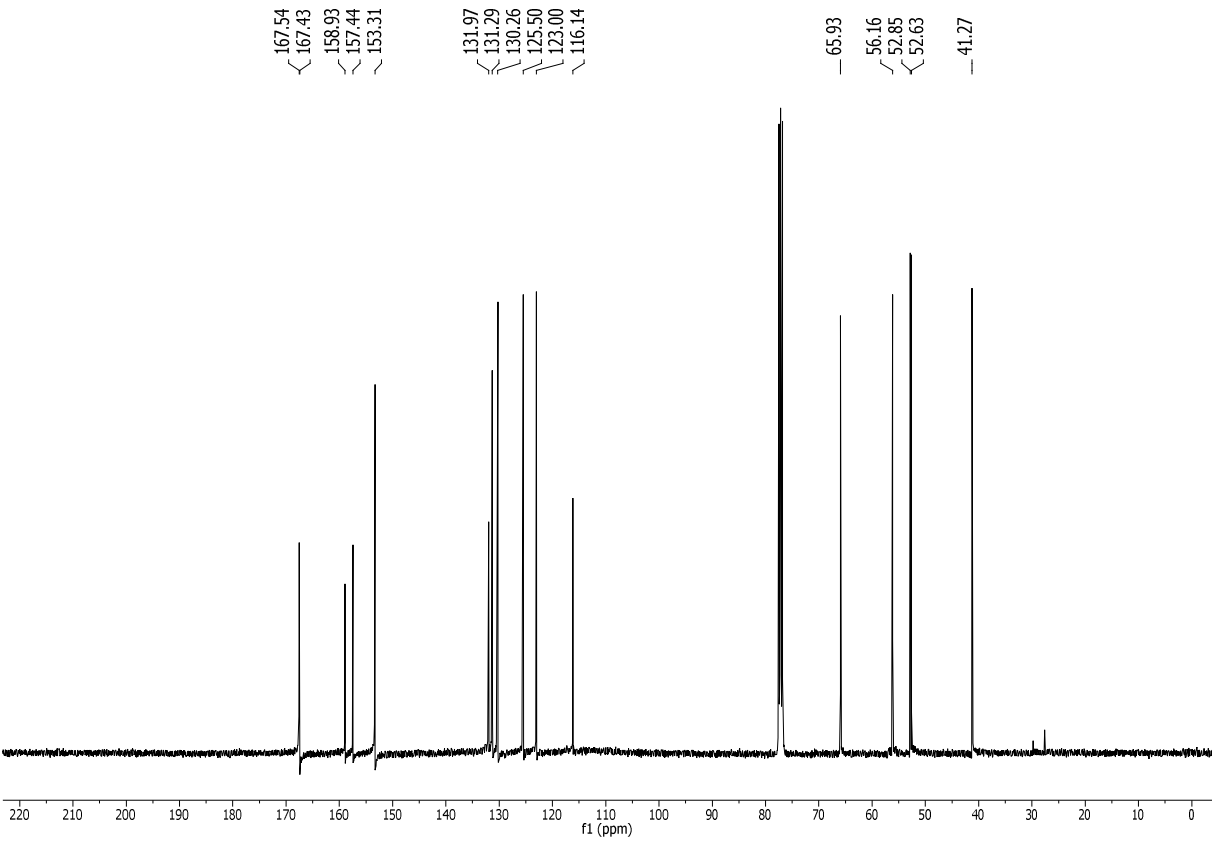

S103

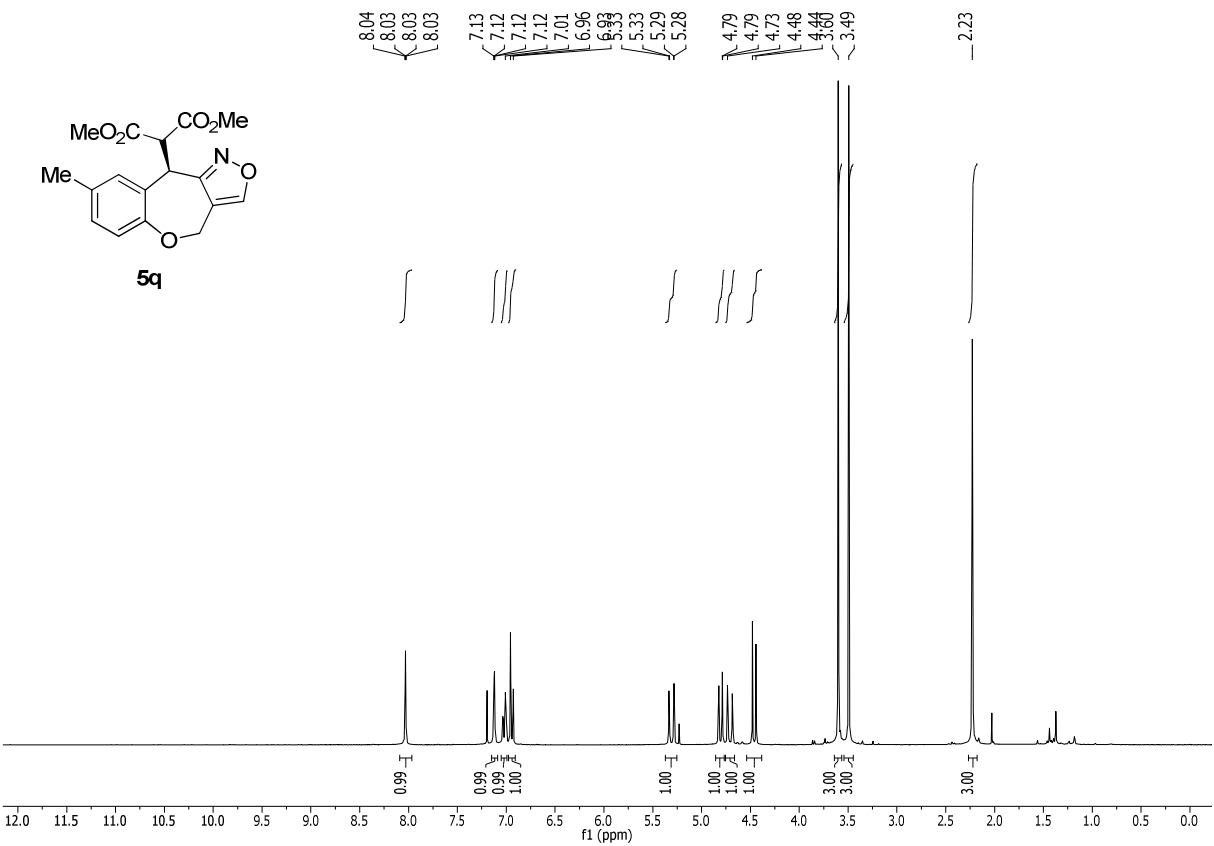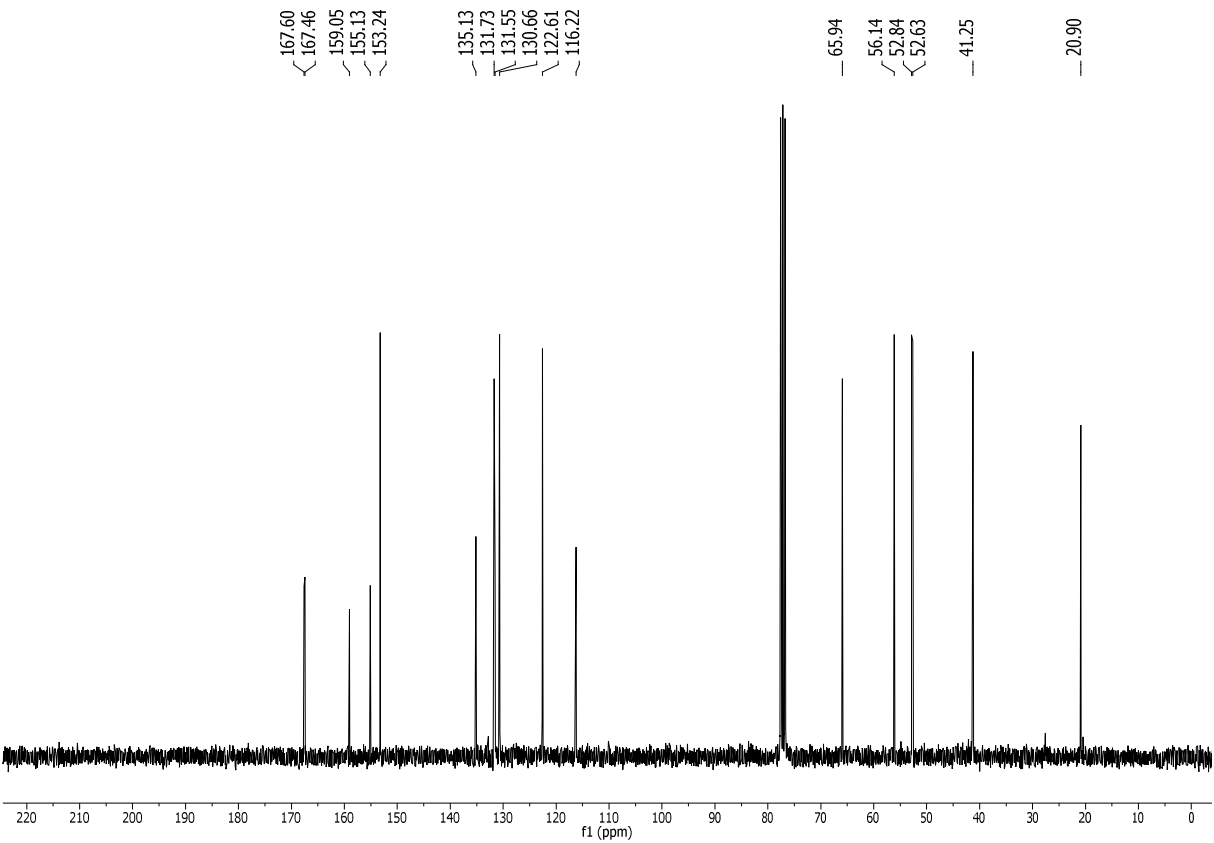

S104

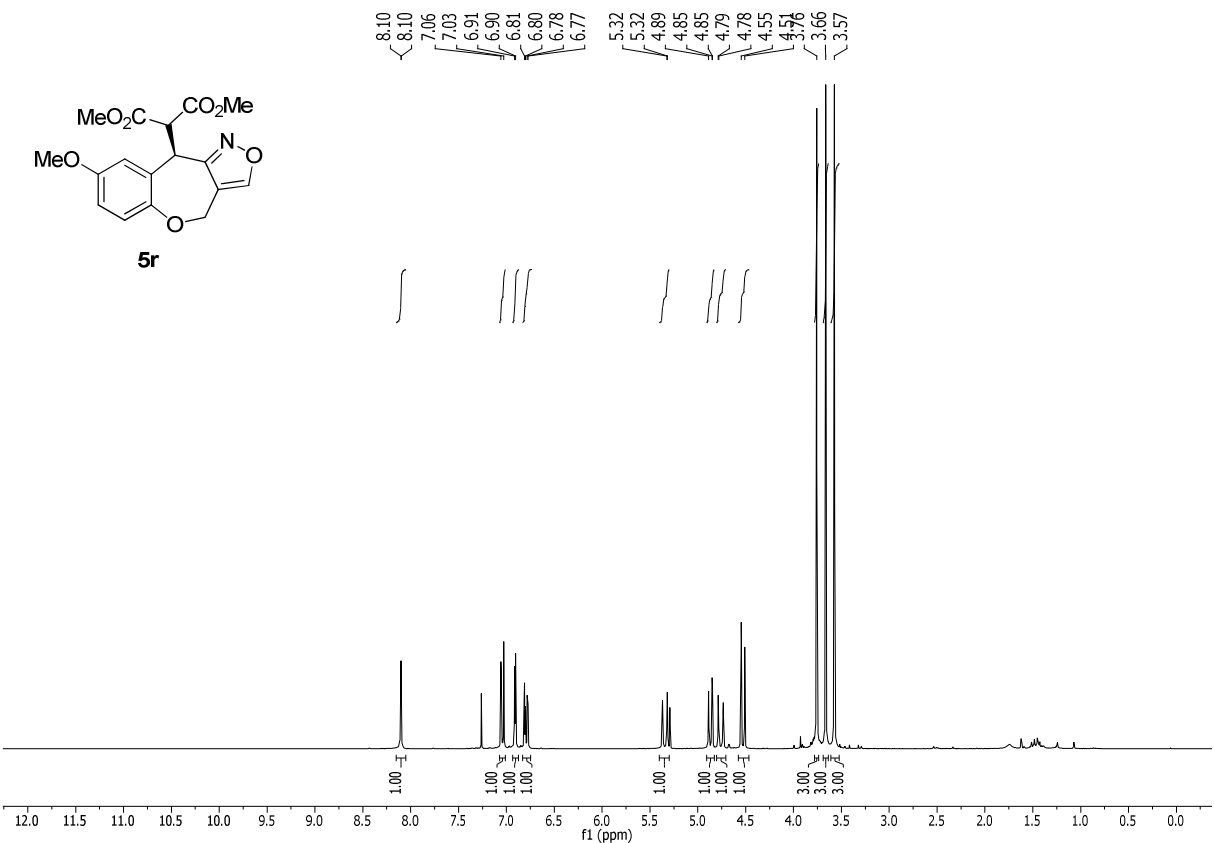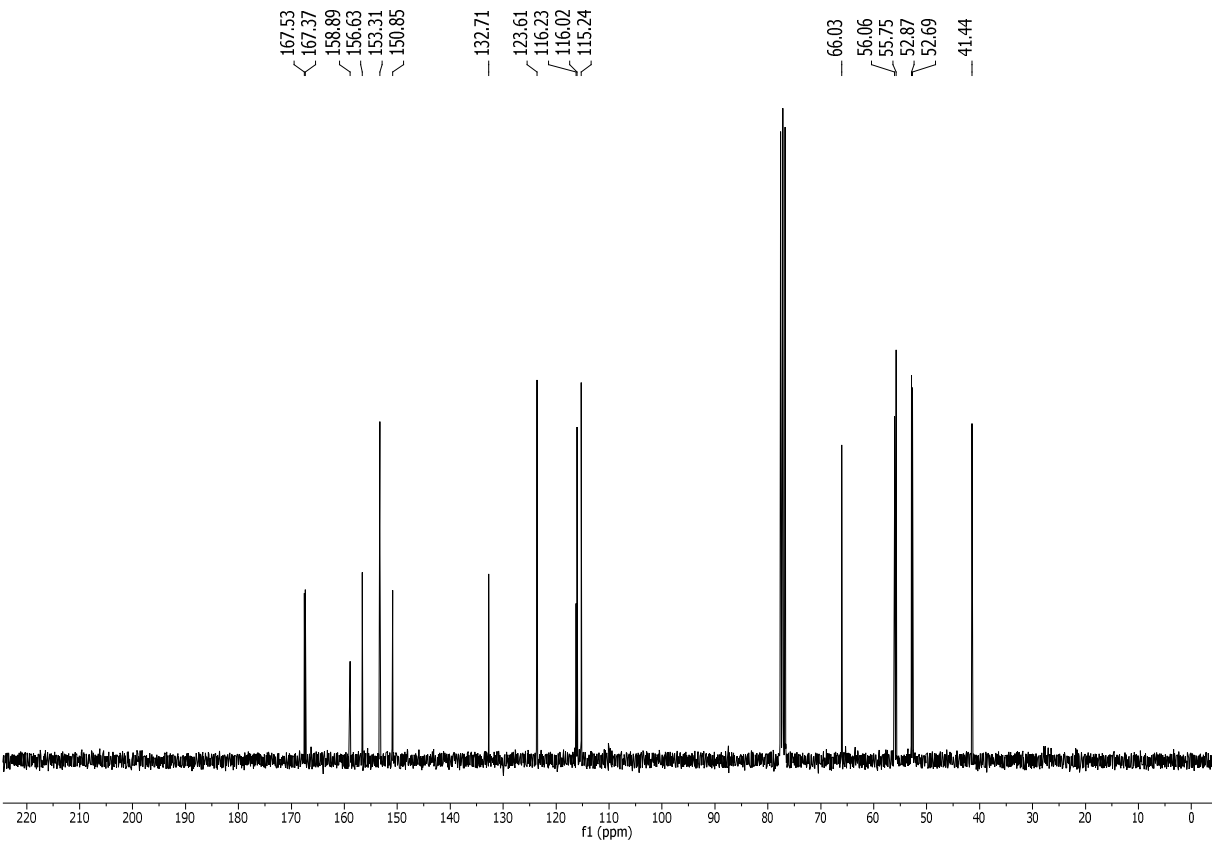

S105

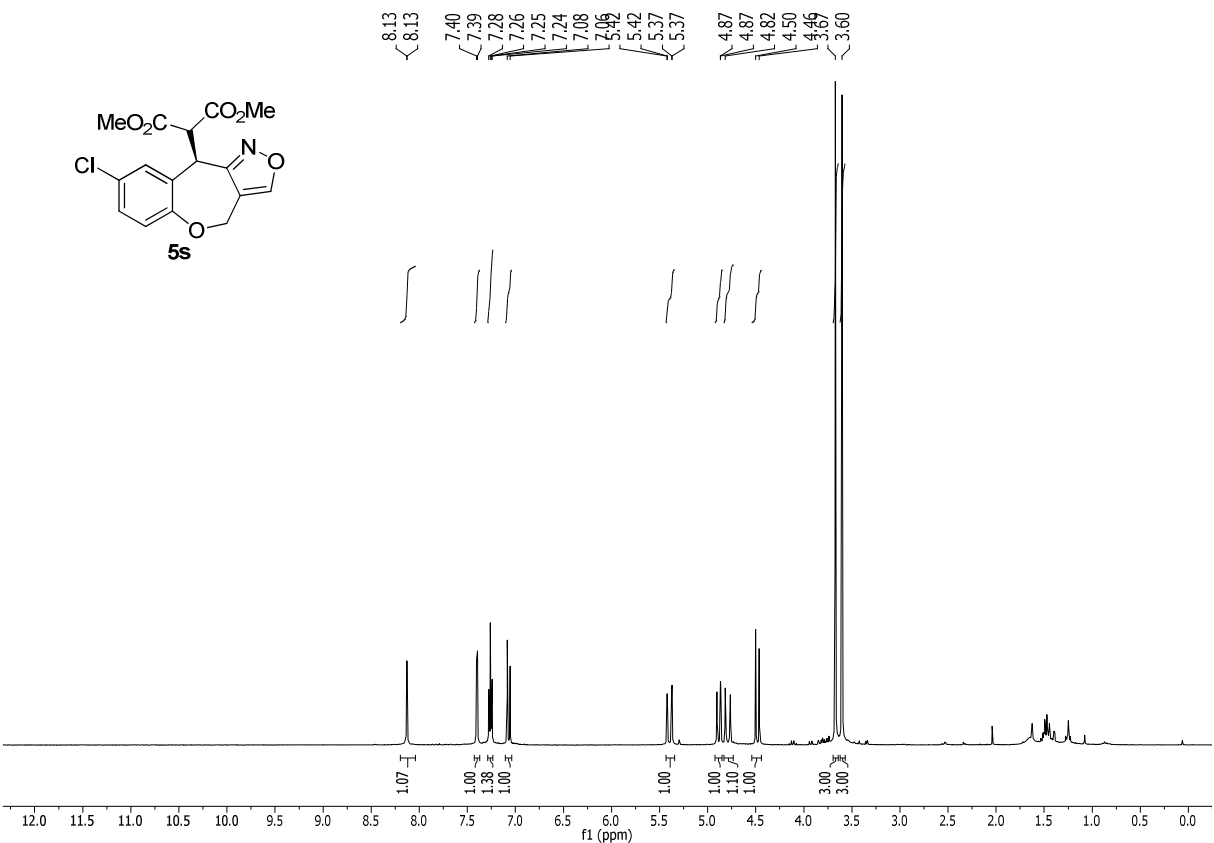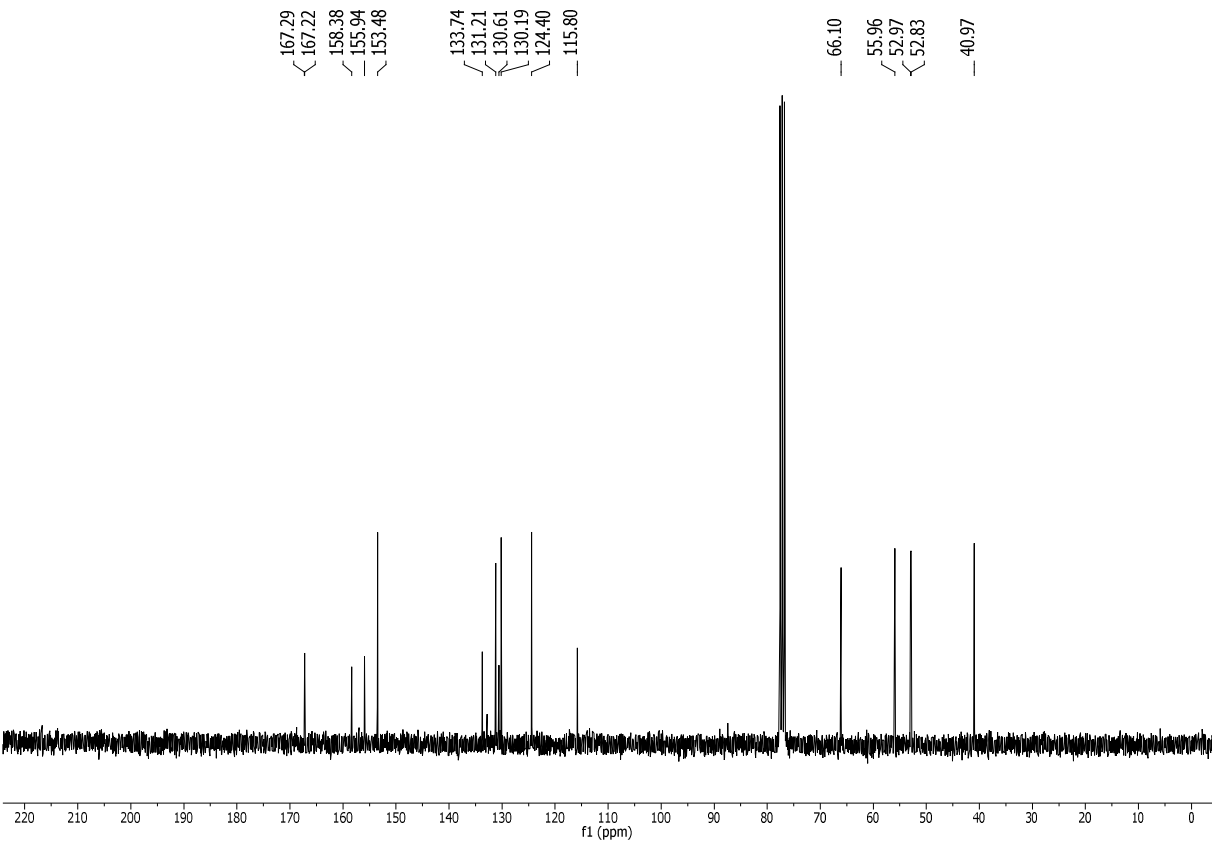

S106

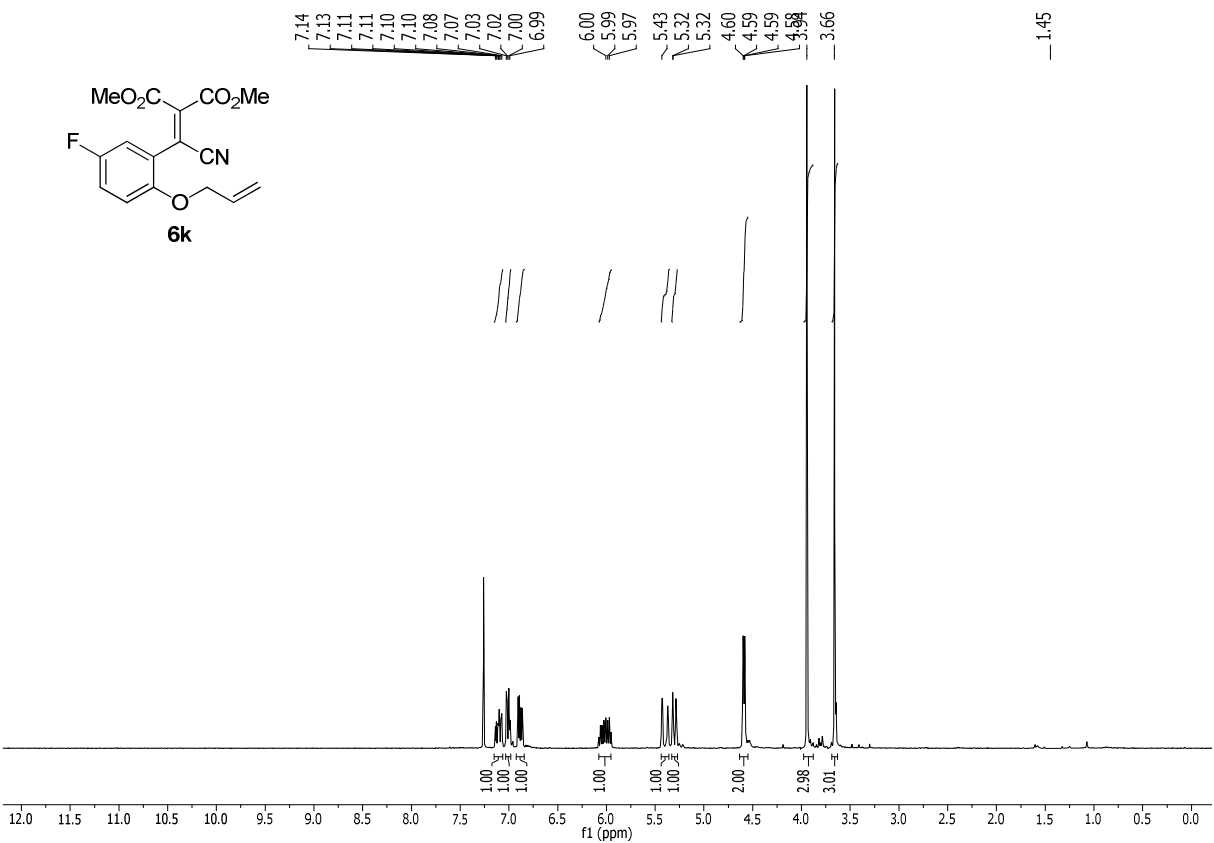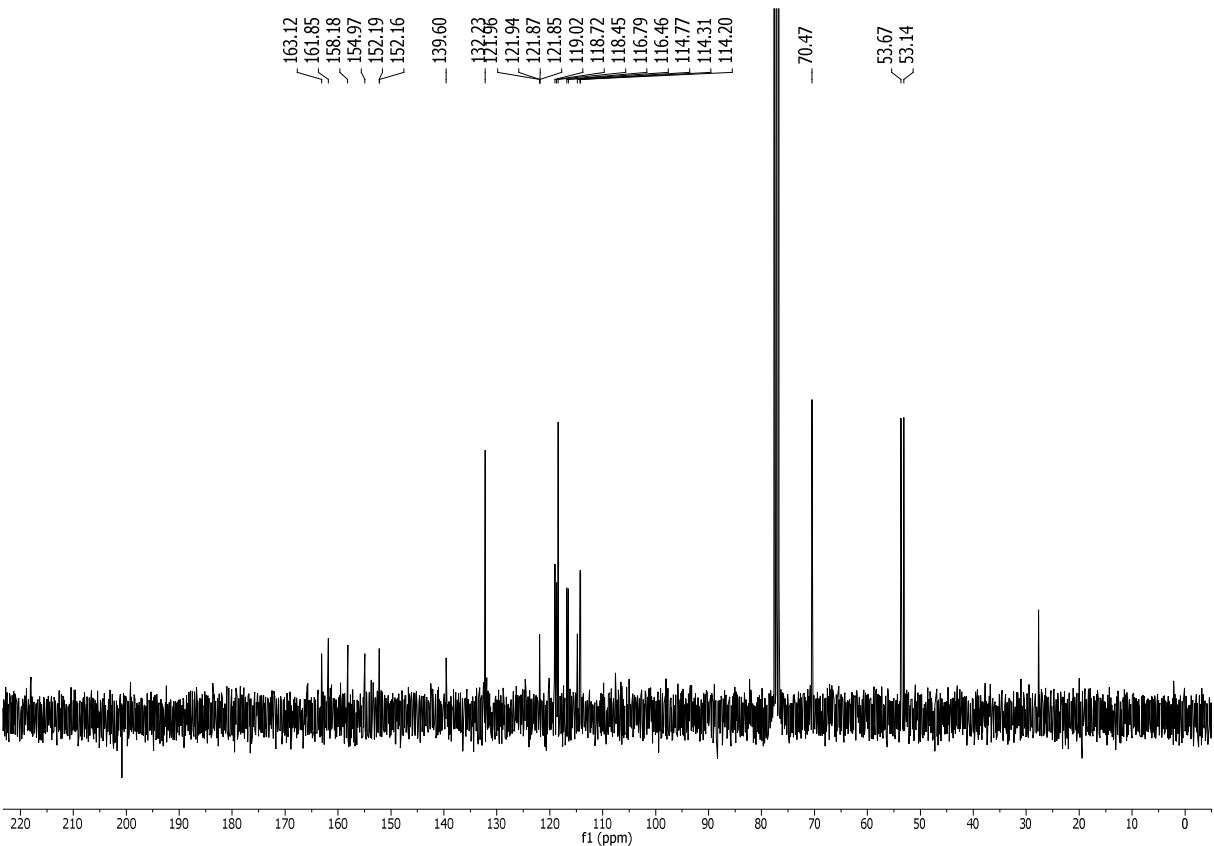

S107

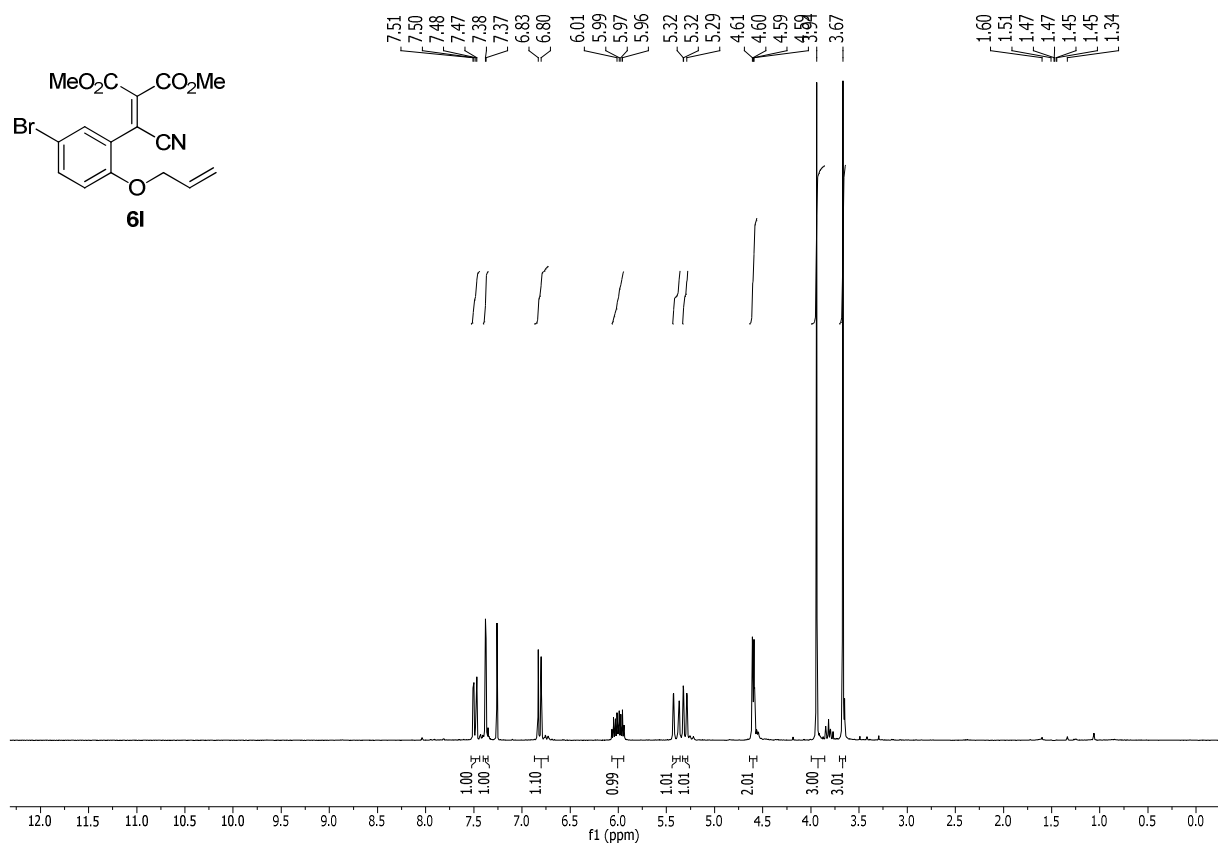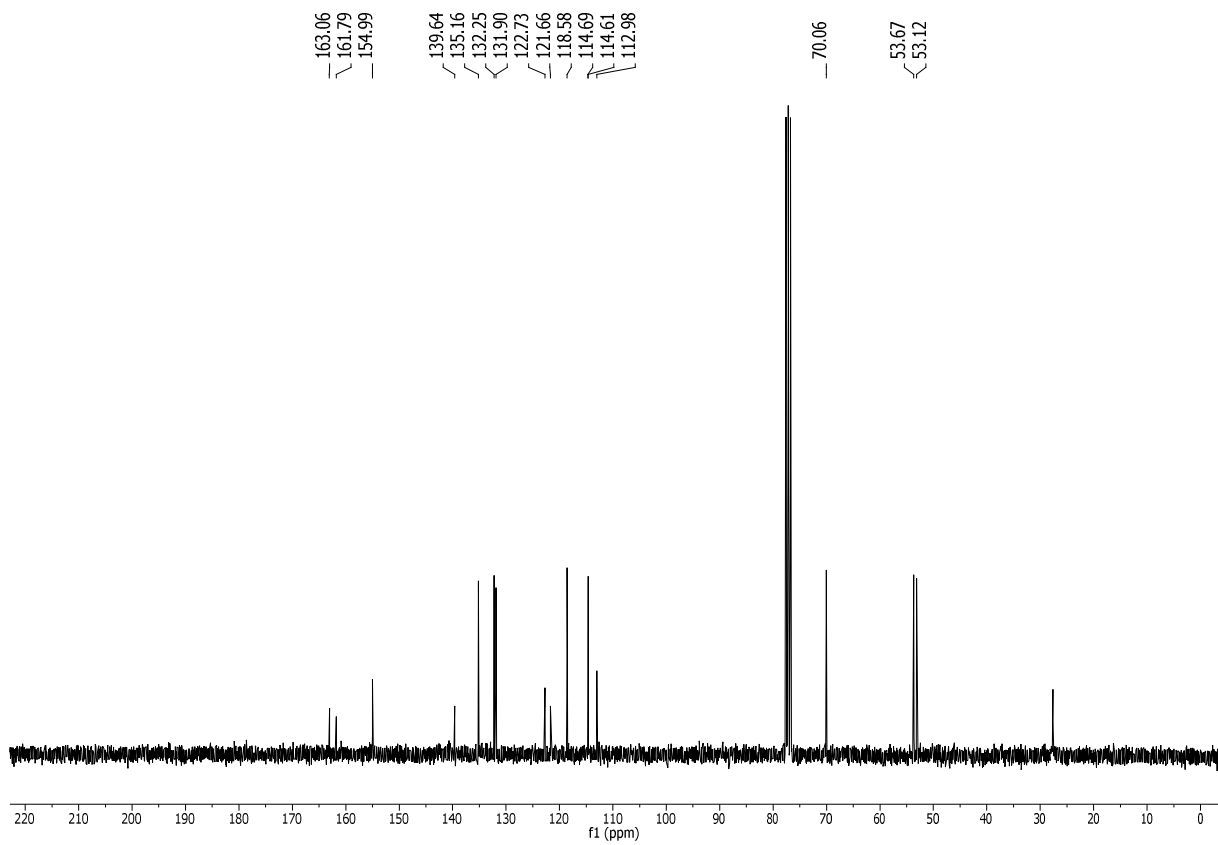

S108

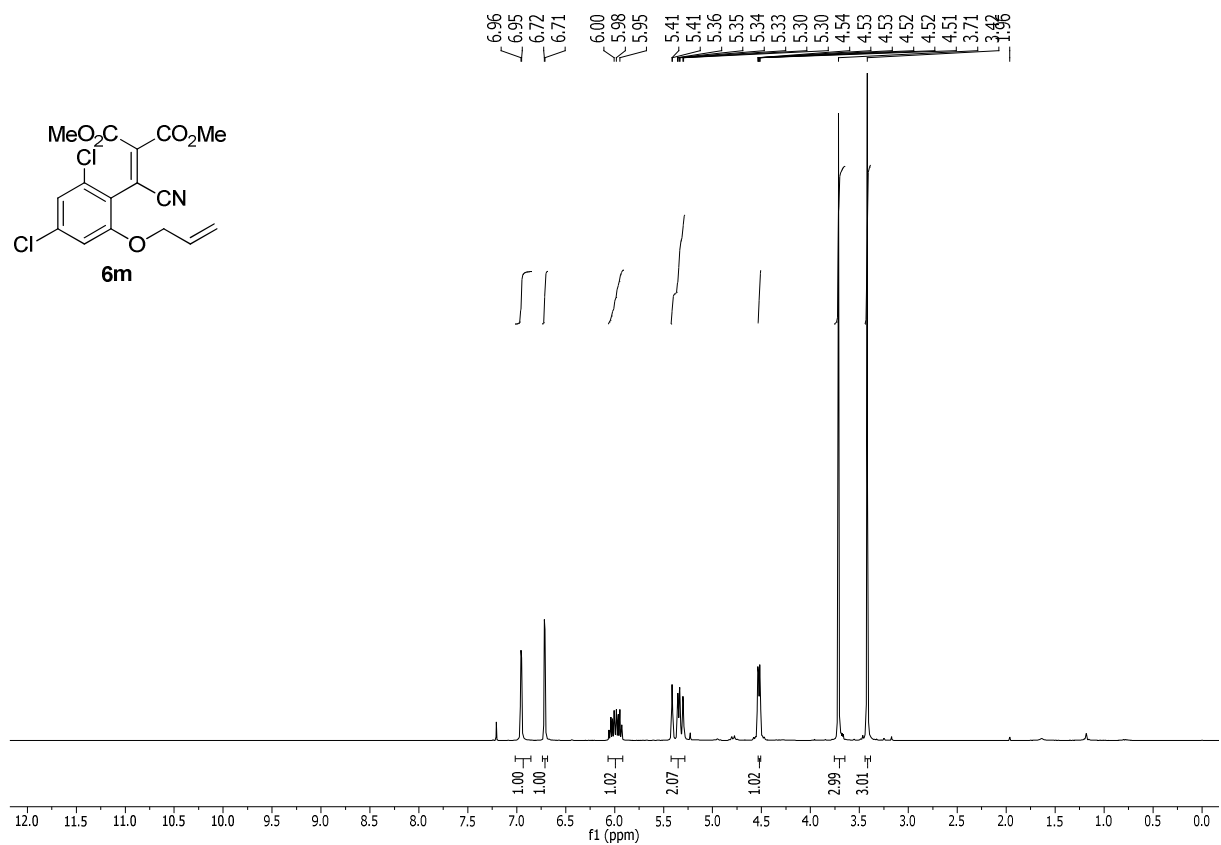



S109

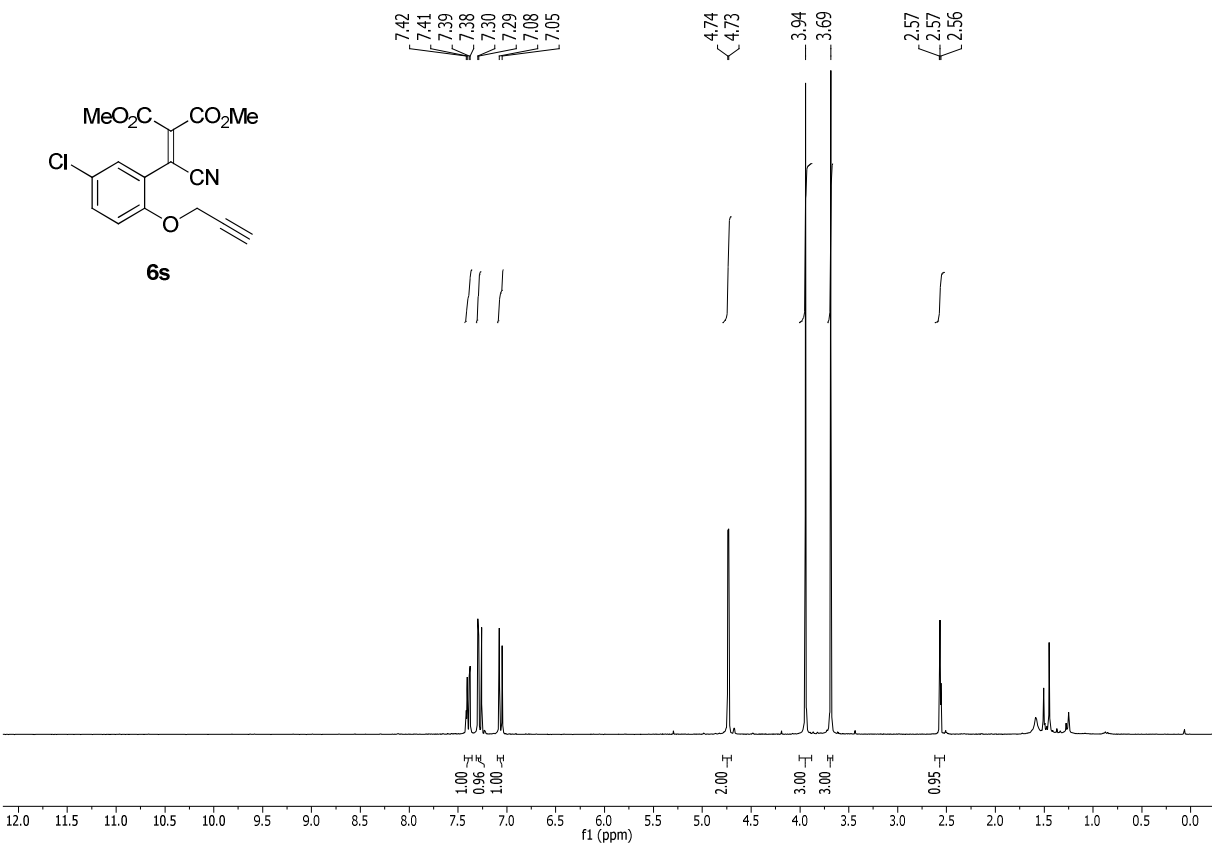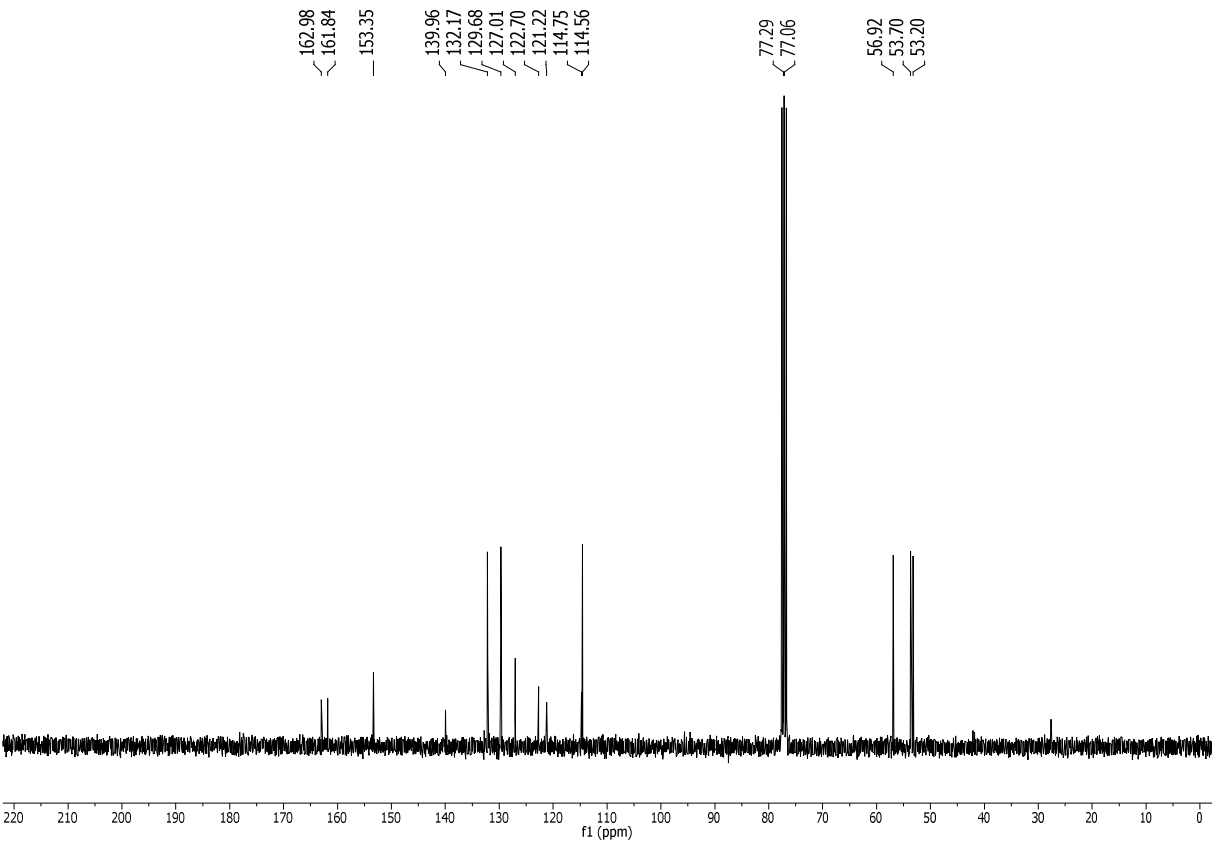

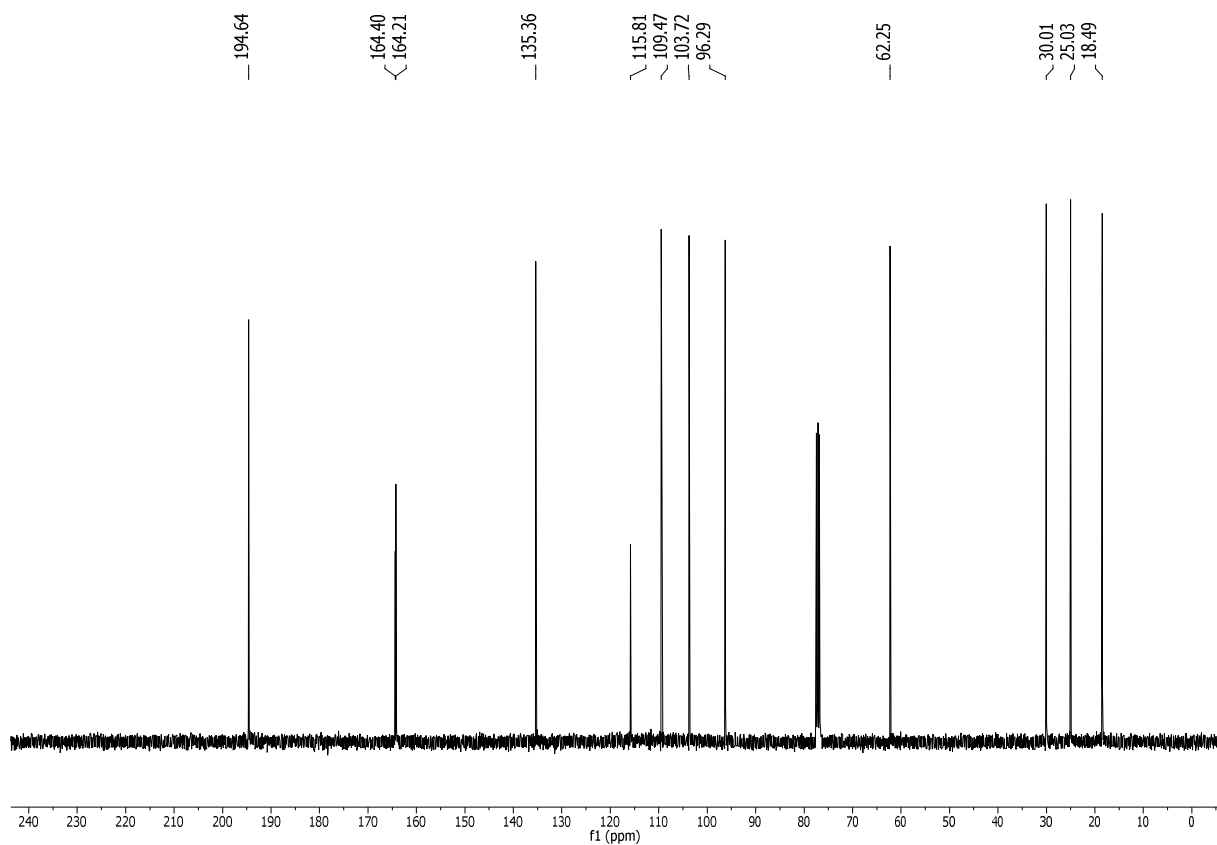

S111

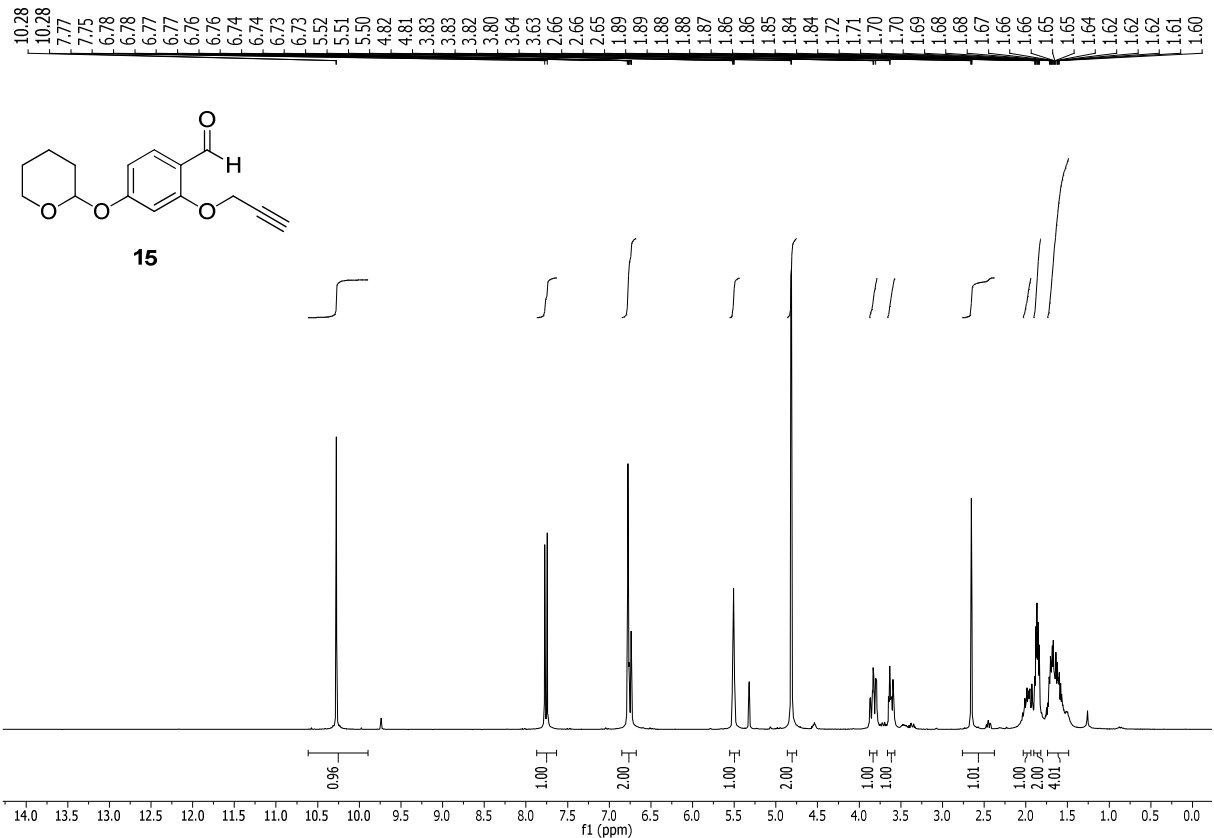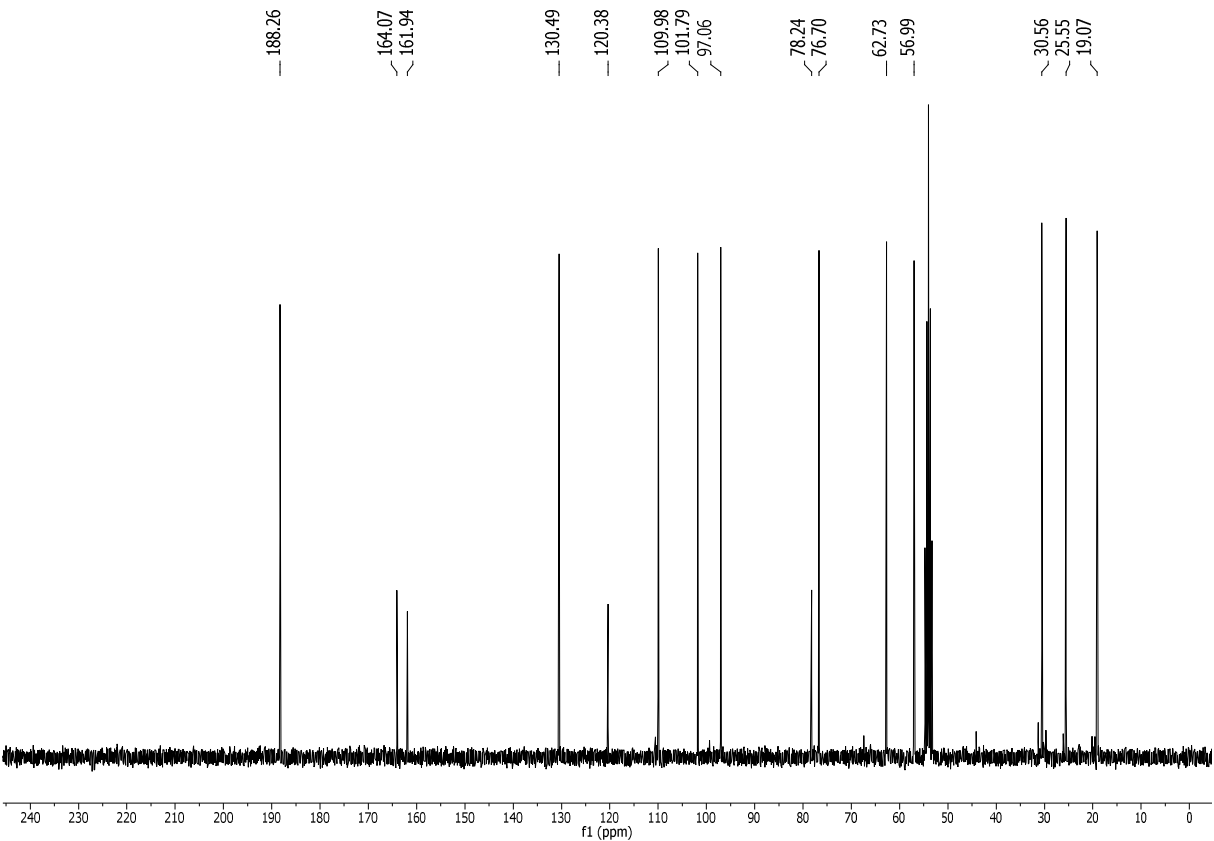

S112

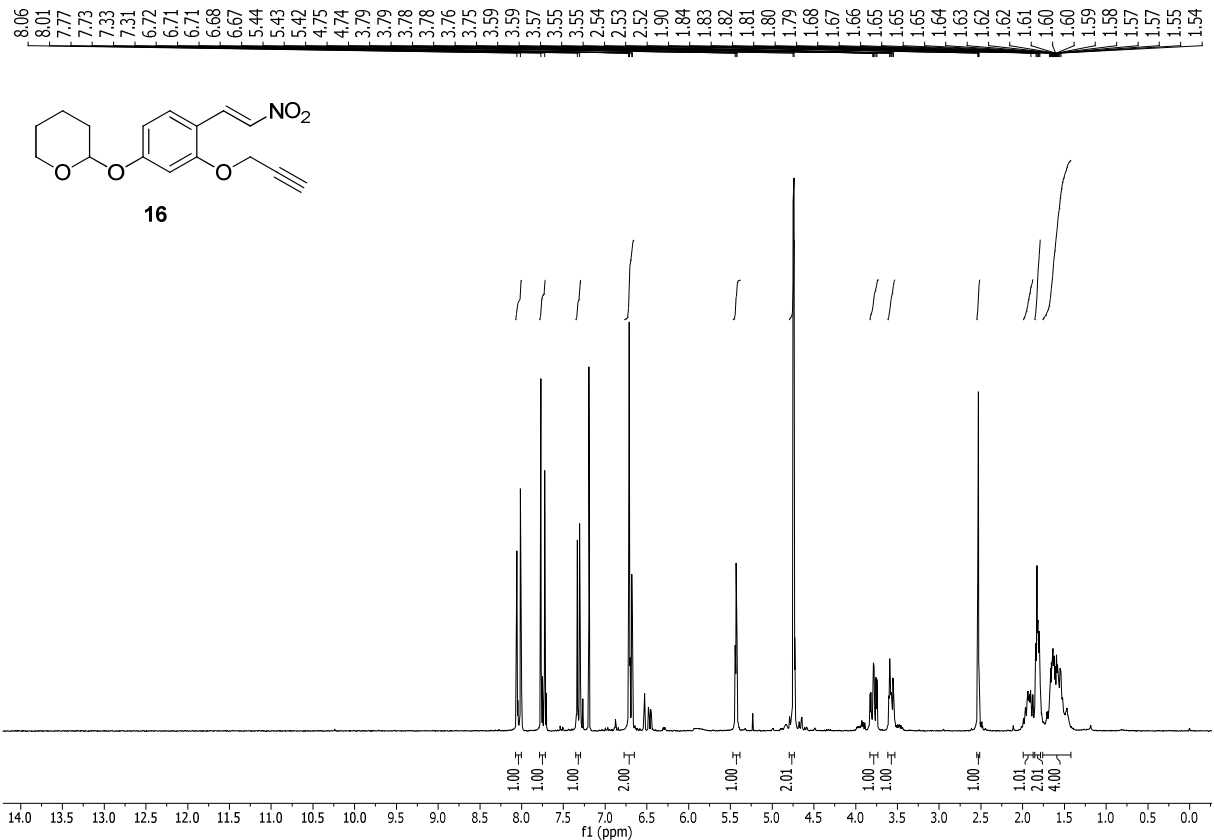

S113

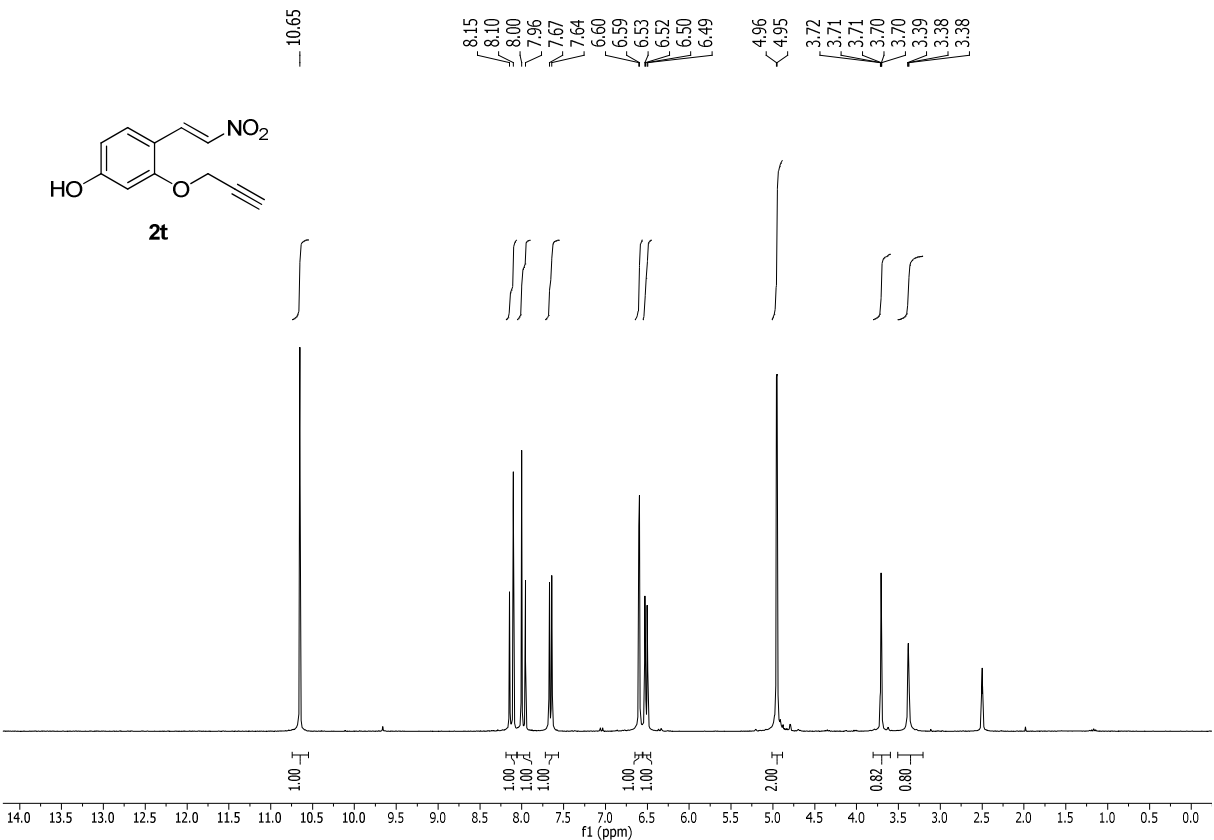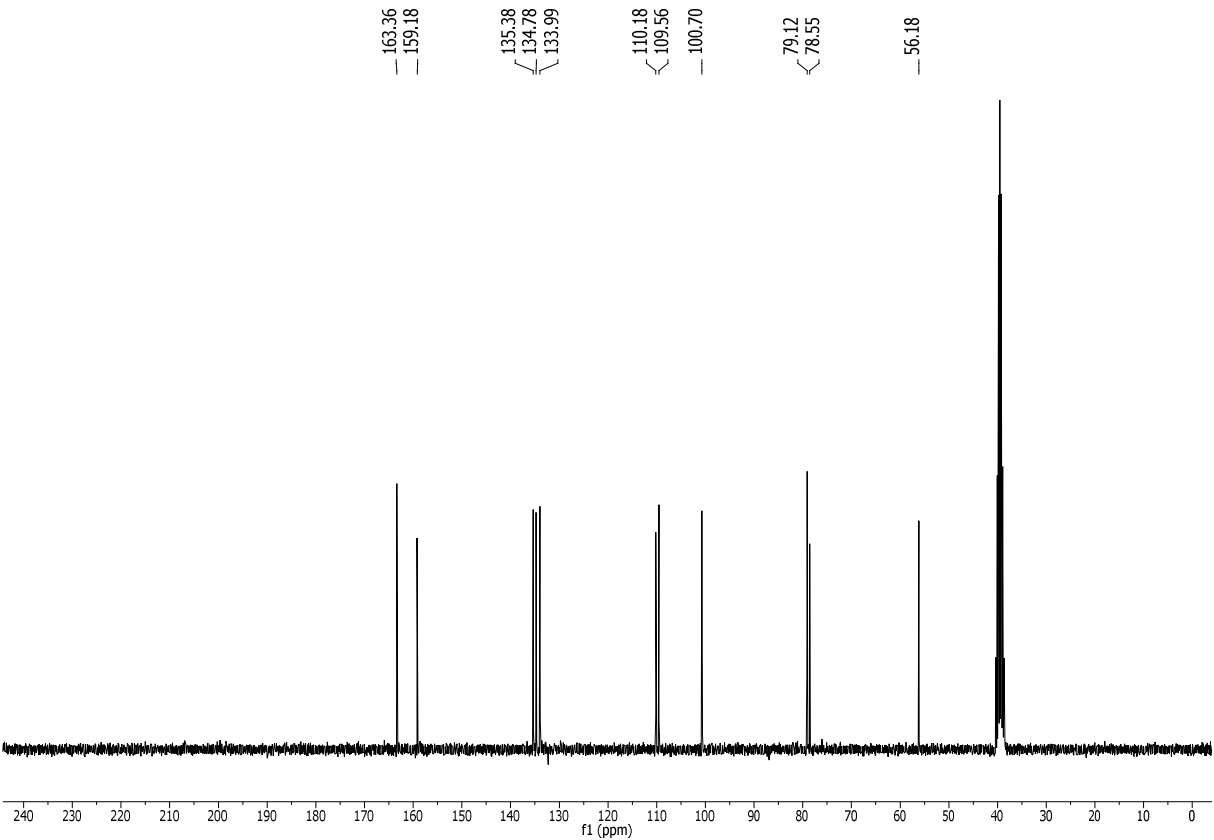

S114

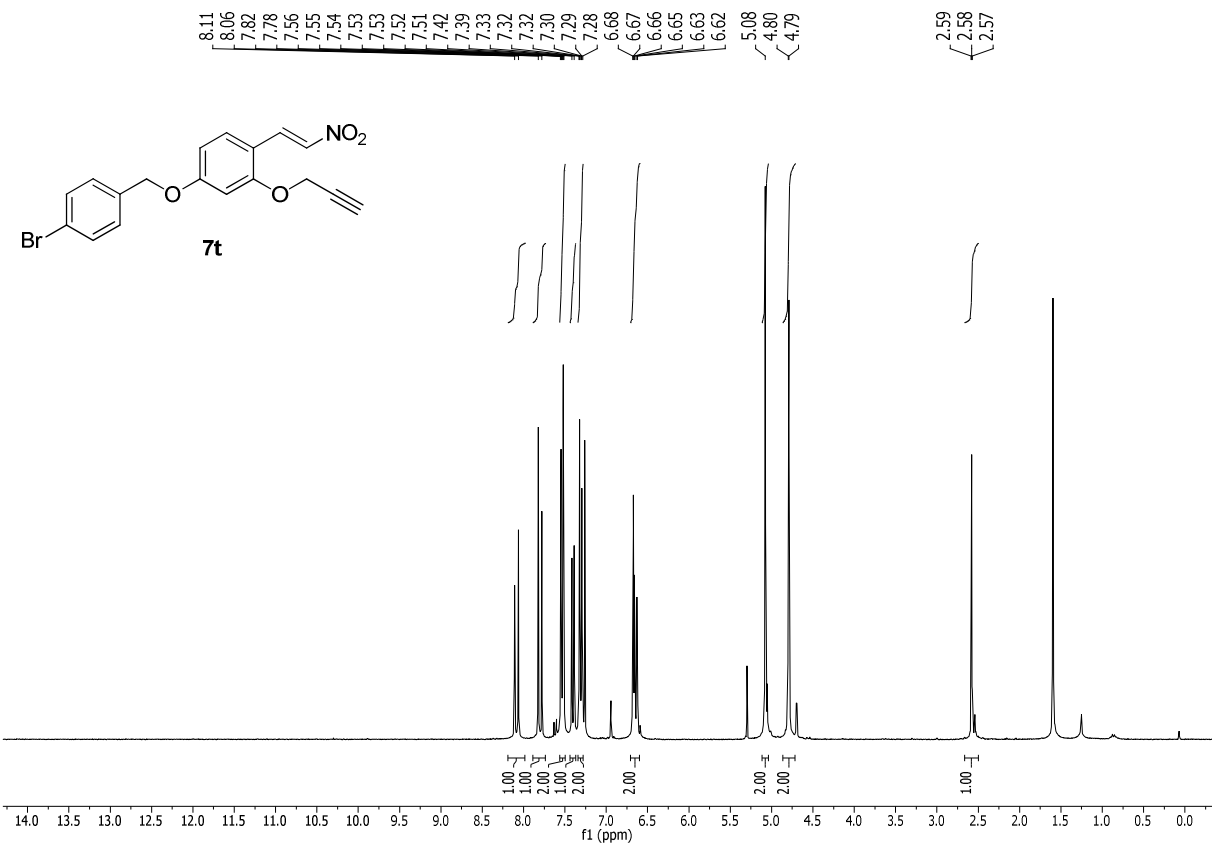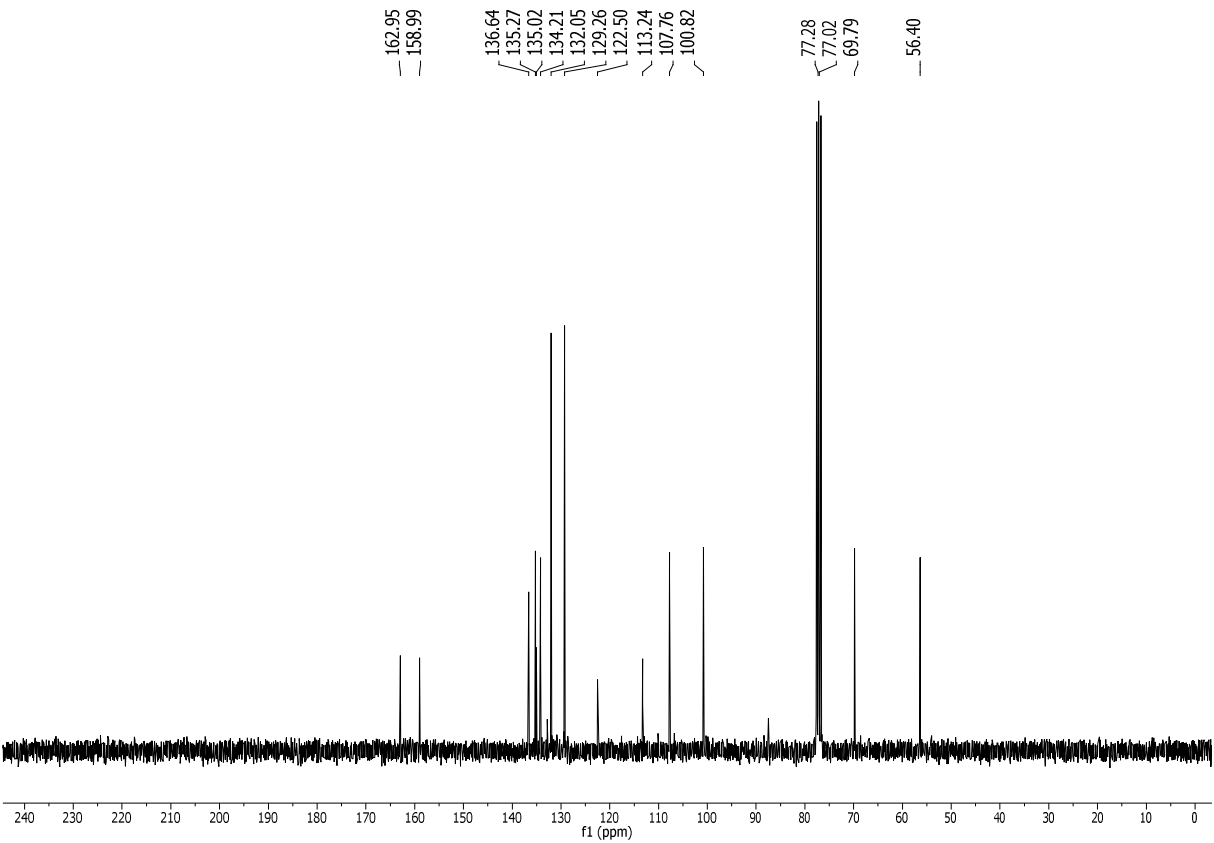

S115

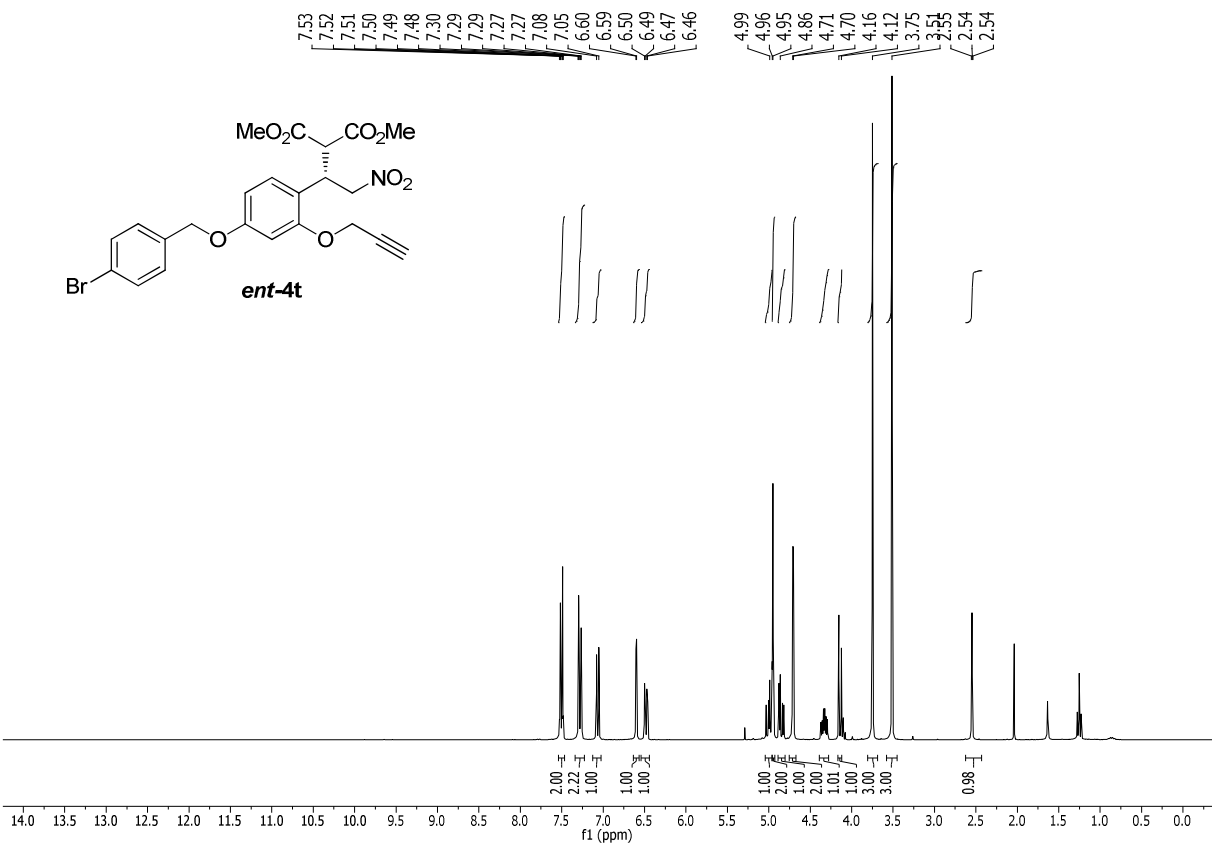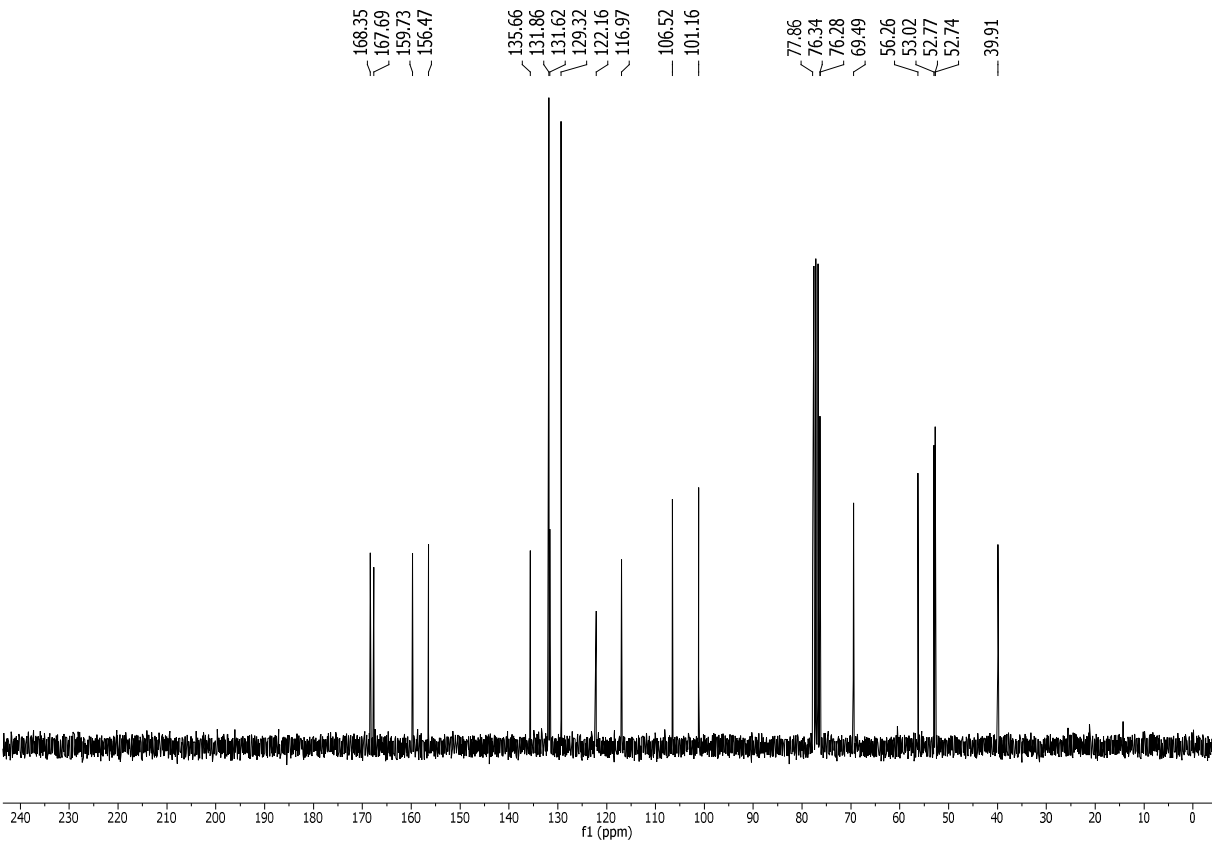

S116

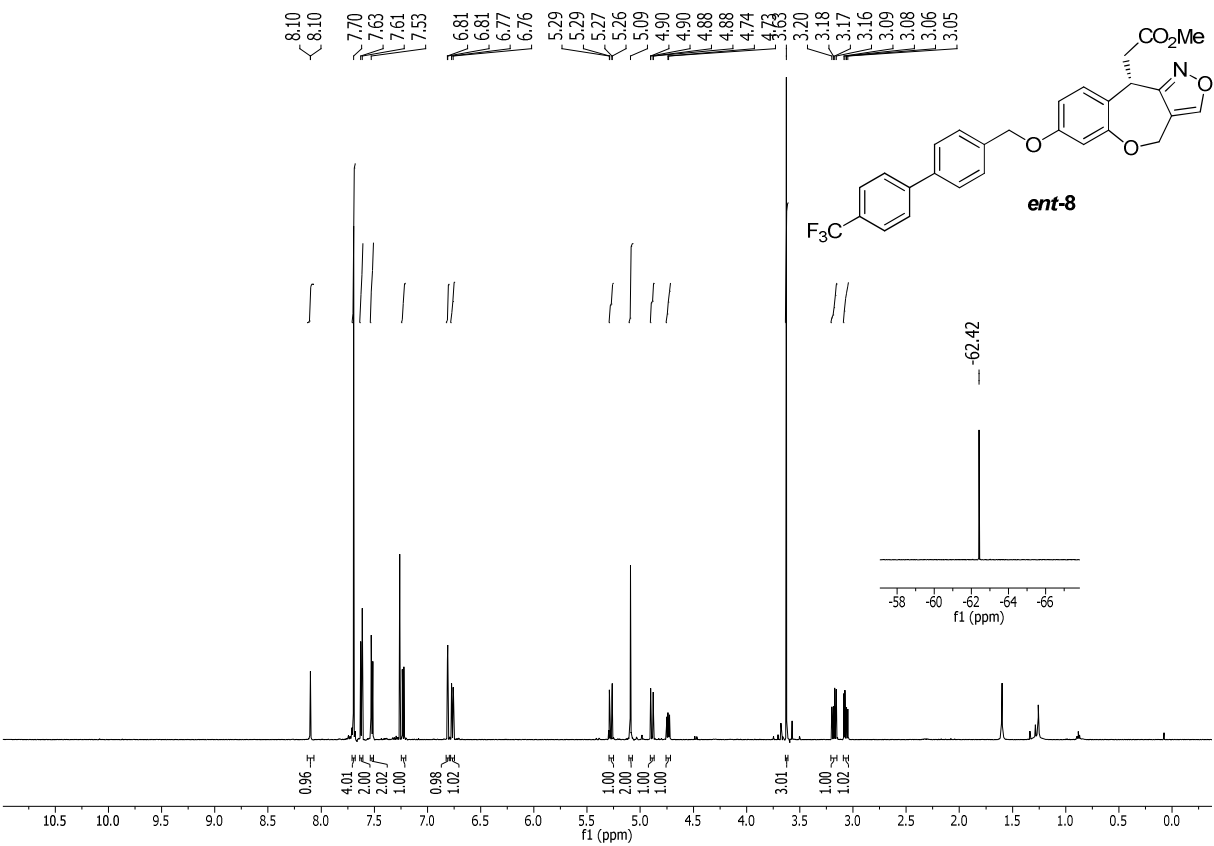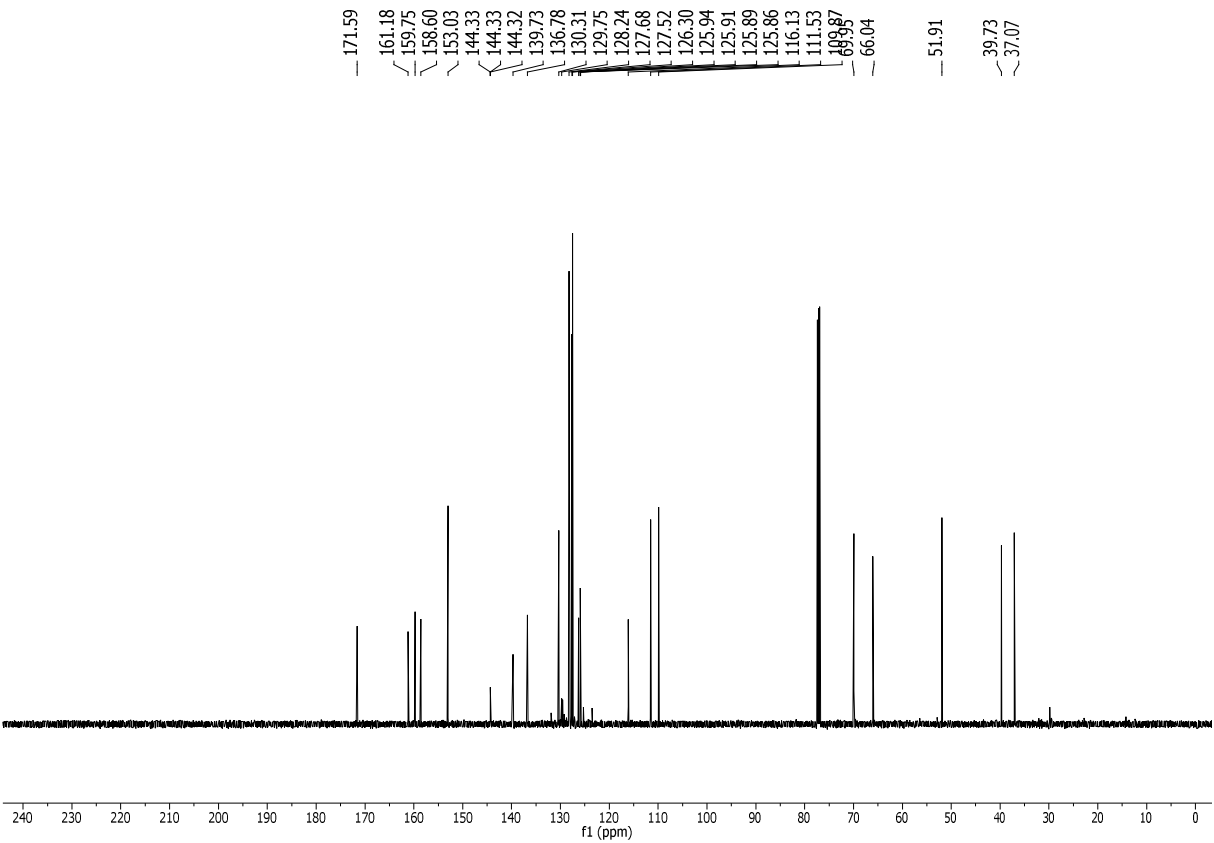

Supplement: c3cc47397j.pdf [file c3cc47397j.pdf]
